# Supplementary material for: Gene regulatory dynamics during craniofacial development in a carnivorous marsupial
Source: eLife. 2025 Oct 28;14:RP103592. doi: 10.7554/eLife.103592 (PMC12563553; doi:10.7554/eLife.103592)
Supplement: Supplementary file 1. — (a) Annotated dunnart peak nearest gene ID conversions. (b) Enriched gene ontology terms for dunnart genes near promoters. (c) Enriched gene ontology terms for dunnart genes near enhancers. (d) Dunnart enhancers and nearest gene expression (TPM). (e) Dunnart promoters and nearest gene expression (TPM). (f) Enriched GO terms for dunnart enhancers and promoters where nearest gene expression ≥10 TPM (FDR <1%). (g) Summary of mouse–dunnart conserved peak activity for a. high-confidence putative promoters and b. putative enhancers. (h) Enhancers with conserved activity in mouse and dunnart with incorporated stage and species gene expression values (TPM). (i) Gene ontology terms for biological processes enriched in genes expressed in mouse and dunnart (>1 TPM) near conserved enhancers. (j) Dunnart-specific enhancers where the nearest genes were highly expressed (>10 TPM) only in the dunnart with low to no activity in the mouse at any of the embryonic stages (E10.5–E15.5). (k) Highly expressed genes (TPM) in dunnart where expression is lower or absent in mouse. (l) Biological processes enrichment for highly expressed genes in dunnart where expression is lower or absent in mouse. (m) Dunnart facial prominence tissue samples. (n) qPCR primer sequences for ChIP enrichment validation. (o) Details of libraries used in genome assembly. (p) DNA fragments isolated after pull down were sequenced by GENEWIZ. Paired-end sequencing at an average depth of 57 million reads. a. Raw reads sequencing statistics, b. Read statistics after CutAdapt filtering. (q) ENCODE mouse embryonic facial prominence ChIP-seq and gene expression quantification file accession numbers and details used in study. (r) Read alignment quality metrics for H3K4me3 and H3K27ac dunnart ChIP-seq samples. (s) Read alignment quality metrics for mouse ENCODE ChIP-seq data. (t) Peak calling quality metrics for H3K4me3 and H3K27ac dunnart ChIP-seq samples. (u) Peak calling quality metrics for mouse ChIP-seq peaks after pea [file elife-103592-supp1.xlsx]

## Sheet: Supplementary File 1a
Supplementary File 1a: Annotated dunnart peak nearest gene ID conversions
	total peaks	annotated peaks RefSeq	converted to Tasmanian devil Ensembl v103	conserved to mouse Ensembl v103
enhancer-associated peaks	60626	60556	37708	35677
high confidence promoter-associated peaks	12295	12295	9024	8589

## Sheet: Supplementary File 1b
Supplementary File 1b: Enriched Gene Ontology terms for dunnart genes near promoters
ID	Description	GeneRatio	BgRatio	RichFactor	FoldEnrichment	zScore	pvalue	p.adjust	qvalue	geneID	Count
GO:0016055	Wnt signaling pathway	265/7747	396/16212	0.669192	1.40041	7.71715	5.99757e-15	3.7173e-11	2.63009e-11	ENSMUSG00000022905/ENSMUSG00000022812/ENSMUSG00000056342/ENSMUSG00000028926/ENSMUSG00000044674/ENSMUSG00000006932/ENSMUSG00000031616/ENSMUSG00000044548/ENSMUSG00000034574/ENSMUSG00000021096/ENSMUSG00000027358/ENSMUSG00000027356/ENSMUSG00000019850/ENSMUSG00000015133/ENSMUSG00000060450/ENSMUSG00000024576/ENSMUSG00000018583/ENSMUSG00000030201/ENSMUSG00000045962/ENSMUSG00000030170/ENSMUSG00000097084/…	265
GO:0010608	post-transcriptional regulation of gene expression	300/7747	461/16212	0.650759	1.36183	7.53982	2.57157e-14	7.96928e-11	5.6385e-11	ENSMUSG00000027770/ENSMUSG00000020464/ENSMUSG00000026728/ENSMUSG00000025962/ENSMUSG00000027993/ENSMUSG00000058355/ENSMUSG00000023087/ENSMUSG00000001729/ENSMUSG00000021282/ENSMUSG00000037526/ENSMUSG00000019977/ENSMUSG00000055652/ENSMUSG00000037058/ENSMUSG00000043991/ENSMUSG00000044595/ENSMUSG00000024608/ENSMUSG00000057666/ENSMUSG00000041477/ENSMUSG00000017478/ENSMUSG00000079036/ENSMUSG00000032265/…	300
GO:0007409	axonogenesis	295/7747	455/16212	0.648352	1.35679	7.38488	8.48534e-14	1.75307e-10	1.24035e-10	ENSMUSG00000025958/ENSMUSG00000026277/ENSMUSG00000022812/ENSMUSG00000022687/ENSMUSG00000051650/ENSMUSG00000000861/ENSMUSG00000020458/ENSMUSG00000026728/ENSMUSG00000032532/ENSMUSG00000032536/ENSMUSG00000031616/ENSMUSG00000021262/ENSMUSG00000048251/ENSMUSG00000005583/ENSMUSG00000028300/ENSMUSG00000070509/ENSMUSG00000024456/ENSMUSG00000024497/ENSMUSG00000024621/ENSMUSG00000038593/ENSMUSG00000049107/…	295
GO:0006402	mRNA catabolic process	158/7747	222/16212	0.711712	1.48939	7.02363	9.89088e-13	1.36588e-09	9.66399e-10	ENSMUSG00000027770/ENSMUSG00000020464/ENSMUSG00000026728/ENSMUSG00000025962/ENSMUSG00000023087/ENSMUSG00000019977/ENSMUSG00000044595/ENSMUSG00000041477/ENSMUSG00000109941/ENSMUSG00000032265/ENSMUSG00000032423/ENSMUSG00000027510/ENSMUSG00000022774/ENSMUSG00000062078/ENSMUSG00000024234/ENSMUSG00000024360/ENSMUSG00000068823/ENSMUSG00000002227/ENSMUSG00000022283/ENSMUSG00000033075/ENSMUSG00000020166/…	158
GO:0099003	vesicle-mediated transport in synapse	192/7747	280/16212	0.685714	1.43498	7.02381	1.10187e-12	1.36588e-09	9.66399e-10	ENSMUSG00000027765/ENSMUSG00000022829/ENSMUSG00000052459/ENSMUSG00000006932/ENSMUSG00000021057/ENSMUSG00000028300/ENSMUSG00000028577/ENSMUSG00000053025/ENSMUSG00000029468/ENSMUSG00000024456/ENSMUSG00000029467/ENSMUSG00000029465/ENSMUSG00000024617/ENSMUSG00000030337/ENSMUSG00000030172/ENSMUSG00000019210/ENSMUSG00000020961/ENSMUSG00000029608/ENSMUSG00000019969/ENSMUSG00000033419/ENSMUSG00000024127/…	192
GO:1990778	protein localization to cell periphery	245/7747	373/16212	0.656836	1.37455	7.00096	1.42107e-12	1.46797e-09	1.03863e-09	ENSMUSG00000027765/ENSMUSG00000022812/ENSMUSG00000036304/ENSMUSG00000022656/ENSMUSG00000051355/ENSMUSG00000020315/ENSMUSG00000049630/ENSMUSG00000040537/ENSMUSG00000045658/ENSMUSG00000025786/ENSMUSG00000029392/ENSMUSG00000029401/ENSMUSG00000037533/ENSMUSG00000001729/ENSMUSG00000021057/ENSMUSG00000047454/ENSMUSG00000049550/ENSMUSG00000019996/ENSMUSG00000019998/ENSMUSG00000019978/ENSMUSG00000024617/…	245
GO:0030111	regulation of Wnt signaling pathway	195/7747	286/16212	0.681818	1.42683	6.96692	1.68737e-12	1.49404e-09	1.05708e-09	ENSMUSG00000022905/ENSMUSG00000022812/ENSMUSG00000056342/ENSMUSG00000028926/ENSMUSG00000044674/ENSMUSG00000006932/ENSMUSG00000044548/ENSMUSG00000021096/ENSMUSG00000027358/ENSMUSG00000027356/ENSMUSG00000019850/ENSMUSG00000015133/ENSMUSG00000060450/ENSMUSG00000024576/ENSMUSG00000018583/ENSMUSG00000030201/ENSMUSG00000045962/ENSMUSG00000030170/ENSMUSG00000097084/ENSMUSG00000061048/ENSMUSG00000019969/…	195
GO:0072659	protein localization to plasma membrane	196/7747	288/16212	0.680556	1.42419	6.94839	1.93661e-12	1.50039e-09	1.06157e-09	ENSMUSG00000027765/ENSMUSG00000036304/ENSMUSG00000022656/ENSMUSG00000051355/ENSMUSG00000020315/ENSMUSG00000045658/ENSMUSG00000025786/ENSMUSG00000029392/ENSMUSG00000029401/ENSMUSG00000037533/ENSMUSG00000001729/ENSMUSG00000021057/ENSMUSG00000019996/ENSMUSG00000019998/ENSMUSG00000024617/ENSMUSG00000030201/ENSMUSG00000024101/ENSMUSG00000045962/ENSMUSG00000034112/ENSMUSG00000031823/ENSMUSG00000031959/…	196
GO:0009896	positive regulation of catabolic process	308/7747	489/16212	0.629857	1.31809	6.83273	4.9532e-12	3.4111e-09	2.41345e-09	ENSMUSG00000026280/ENSMUSG00000027761/ENSMUSG00000027770/ENSMUSG00000049502/ENSMUSG00000022812/ENSMUSG00000022708/ENSMUSG00000020464/ENSMUSG00000028082/ENSMUSG00000023087/ENSMUSG00000020402/ENSMUSG00000001729/ENSMUSG00000021270/ENSMUSG00000044548/ENSMUSG00000021109/ENSMUSG00000019850/ENSMUSG00000050473/ENSMUSG00000039089/ENSMUSG00000028300/ENSMUSG00000070509/ENSMUSG00000029468/ENSMUSG00000044595/…	308
GO:1903311	regulation of mRNA metabolic process	189/7747	280/16212	0.675	1.41256	6.66176	1.48551e-11	9.20721e-09	6.51437e-09	ENSMUSG00000027763/ENSMUSG00000027770/ENSMUSG00000020464/ENSMUSG00000026728/ENSMUSG00000025962/ENSMUSG00000023087/ENSMUSG00000022185/ENSMUSG00000064138/ENSMUSG00000044595/ENSMUSG00000041477/ENSMUSG00000021210/ENSMUSG00000010608/ENSMUSG00000032265/ENSMUSG00000032423/ENSMUSG00000027510/ENSMUSG00000060475/ENSMUSG00000062078/ENSMUSG00000068823/ENSMUSG00000002227/ENSMUSG00000027893/ENSMUSG00000022283/…	189
GO:0045927	positive regulation of growth	187/7747	278/16212	0.672662	1.40767	6.55879	3.02573e-11	1.62788e-08	1.15177e-08	ENSMUSG00000025958/ENSMUSG00000022812/ENSMUSG00000000861/ENSMUSG00000001729/ENSMUSG00000021944/ENSMUSG00000005583/ENSMUSG00000019970/ENSMUSG00000029475/ENSMUSG00000028577/ENSMUSG00000024486/ENSMUSG00000024431/ENSMUSG00000005069/ENSMUSG00000030189/ENSMUSG00000006519/ENSMUSG00000031729/ENSMUSG00000004788/ENSMUSG00000029602/ENSMUSG00000052397/ENSMUSG00000025810/ENSMUSG00000027859/ENSMUSG00000014599/…	187
GO:0006401	RNA catabolic process	176/7747	259/16212	0.679537	1.42205	6.5502	3.15175e-11	1.62788e-08	1.15177e-08	ENSMUSG00000027770/ENSMUSG00000020464/ENSMUSG00000026728/ENSMUSG00000025962/ENSMUSG00000023087/ENSMUSG00000019977/ENSMUSG00000044595/ENSMUSG00000041477/ENSMUSG00000017478/ENSMUSG00000109941/ENSMUSG00000032265/ENSMUSG00000032423/ENSMUSG00000027510/ENSMUSG00000022774/ENSMUSG00000062078/ENSMUSG00000024234/ENSMUSG00000024360/ENSMUSG00000068823/ENSMUSG00000002227/ENSMUSG00000022283/ENSMUSG00000033075/…	176
GO:0043087	regulation of GTPase activity	146/7747	208/16212	0.701923	1.4689	6.51114	3.84117e-11	1.7668e-08	1.25006e-08	ENSMUSG00000022508/ENSMUSG00000022812/ENSMUSG00000026727/ENSMUSG00000037533/ENSMUSG00000028300/ENSMUSG00000070509/ENSMUSG00000024451/ENSMUSG00000024493/ENSMUSG00000049107/ENSMUSG00000045962/ENSMUSG00000021215/ENSMUSG00000042700/ENSMUSG00000002365/ENSMUSG00000024277/ENSMUSG00000033721/ENSMUSG00000033763/ENSMUSG00000052920/ENSMUSG00000022469/ENSMUSG00000020130/ENSMUSG00000022114/ENSMUSG00000019920/…	146
GO:0048638	regulation of developmental growth	227/7747	349/16212	0.65043	1.36114	6.52464	3.99084e-11	1.7668e-08	1.25006e-08	ENSMUSG00000025958/ENSMUSG00000022812/ENSMUSG00000000861/ENSMUSG00000020458/ENSMUSG00000001729/ENSMUSG00000051367/ENSMUSG00000021944/ENSMUSG00000005583/ENSMUSG00000039910/ENSMUSG00000028577/ENSMUSG00000070509/ENSMUSG00000024454/ENSMUSG00000024431/ENSMUSG00000005069/ENSMUSG00000003031/ENSMUSG00000030189/ENSMUSG00000042605/ENSMUSG00000031729/ENSMUSG00000004788/ENSMUSG00000029602/ENSMUSG00000027523/…	227
GO:0016049	cell growth	304/7747	488/16212	0.622951	1.30364	6.51541	4.39506e-11	1.81604e-08	1.2849e-08	ENSMUSG00000022508/ENSMUSG00000026283/ENSMUSG00000022812/ENSMUSG00000020160/ENSMUSG00000038845/ENSMUSG00000049800/ENSMUSG00000000861/ENSMUSG00000020458/ENSMUSG00000006932/ENSMUSG00000031616/ENSMUSG00000001729/ENSMUSG00000021294/ENSMUSG00000021944/ENSMUSG00000019970/ENSMUSG00000029475/ENSMUSG00000028300/ENSMUSG00000028577/ENSMUSG00000066406/ENSMUSG00000025789/ENSMUSG00000070509/ENSMUSG00000024486/…	304
GO:0043488	regulation of mRNA stability	110/7747	150/16212	0.733333	1.53463	6.29303	1.47777e-10	5.7245e-08	4.05025e-08	ENSMUSG00000027770/ENSMUSG00000020464/ENSMUSG00000026728/ENSMUSG00000025962/ENSMUSG00000023087/ENSMUSG00000044595/ENSMUSG00000041477/ENSMUSG00000032265/ENSMUSG00000032423/ENSMUSG00000027510/ENSMUSG00000062078/ENSMUSG00000068823/ENSMUSG00000002227/ENSMUSG00000022283/ENSMUSG00000033075/ENSMUSG00000020166/ENSMUSG00000038542/ENSMUSG00000029423/ENSMUSG00000042650/ENSMUSG00000035960/ENSMUSG00000024472/…	110
GO:0061013	regulation of mRNA catabolic process	119/7747	165/16212	0.721212	1.50927	6.28997	1.58079e-10	5.76336e-08	4.07775e-08	ENSMUSG00000027770/ENSMUSG00000020464/ENSMUSG00000026728/ENSMUSG00000025962/ENSMUSG00000023087/ENSMUSG00000044595/ENSMUSG00000041477/ENSMUSG00000032265/ENSMUSG00000032423/ENSMUSG00000027510/ENSMUSG00000062078/ENSMUSG00000068823/ENSMUSG00000002227/ENSMUSG00000022283/ENSMUSG00000033075/ENSMUSG00000020166/ENSMUSG00000038542/ENSMUSG00000038398/ENSMUSG00000029423/ENSMUSG00000042650/ENSMUSG00000006288/…	119
GO:0007264	small GTPase-mediated signal transduction	254/7747	402/16212	0.631841	1.32224	6.25873	2.35814e-10	8.11987e-08	5.74504e-08	ENSMUSG00000022508/ENSMUSG00000034066/ENSMUSG00000036894/ENSMUSG00000022799/ENSMUSG00000020458/ENSMUSG00000026727/ENSMUSG00000031616/ENSMUSG00000037533/ENSMUSG00000021062/ENSMUSG00000030265/ENSMUSG00000019852/ENSMUSG00000039031/ENSMUSG00000066406/ENSMUSG00000024347/ENSMUSG00000024427/ENSMUSG00000024576/ENSMUSG00000024620/ENSMUSG00000020375/ENSMUSG00000001517/ENSMUSG00000040797/ENSMUSG00000021215/…	254
GO:0032956	regulation of actin cytoskeleton organization	209/7747	322/16212	0.649068	1.35829	6.21244	3.11919e-10	1.01751e-07	7.1992e-08	ENSMUSG00000036885/ENSMUSG00000033149/ENSMUSG00000020315/ENSMUSG00000074513/ENSMUSG00000020388/ENSMUSG00000021262/ENSMUSG00000000915/ENSMUSG00000021061/ENSMUSG00000026778/ENSMUSG00000005583/ENSMUSG00000019997/ENSMUSG00000039031/ENSMUSG00000028300/ENSMUSG00000066406/ENSMUSG00000030516/ENSMUSG00000038524/ENSMUSG00000024451/ENSMUSG00000029465/ENSMUSG00000024621/ENSMUSG00000024620/ENSMUSG00000043079/…	209
GO:0034655	nucleobase-containing compound catabolic process	293/7747	474/16212	0.618143	1.29358	6.20576	3.34262e-10	1.03588e-07	7.32913e-08	ENSMUSG00000027770/ENSMUSG00000022708/ENSMUSG00000020128/ENSMUSG00000020464/ENSMUSG00000026728/ENSMUSG00000025962/ENSMUSG00000023087/ENSMUSG00000021109/ENSMUSG00000026773/ENSMUSG00000019990/ENSMUSG00000019977/ENSMUSG00000037440/ENSMUSG00000029468/ENSMUSG00000044595/ENSMUSG00000057666/ENSMUSG00000004267/ENSMUSG00000041477/ENSMUSG00000009112/ENSMUSG00000017478/ENSMUSG00000109941/ENSMUSG00000019969/…	293
GO:0099504	synaptic vesicle cycle	157/7747	231/16212	0.679654	1.4223	6.18417	3.55153e-10	1.04821e-07	7.41638e-08	ENSMUSG00000027765/ENSMUSG00000022829/ENSMUSG00000052459/ENSMUSG00000006932/ENSMUSG00000028300/ENSMUSG00000028577/ENSMUSG00000053025/ENSMUSG00000029468/ENSMUSG00000024456/ENSMUSG00000029467/ENSMUSG00000029465/ENSMUSG00000024617/ENSMUSG00000030337/ENSMUSG00000030172/ENSMUSG00000019210/ENSMUSG00000020961/ENSMUSG00000029608/ENSMUSG00000019969/ENSMUSG00000033419/ENSMUSG00000024127/ENSMUSG00000002365/…	157
GO:0032970	regulation of actin filament-based process	231/7747	362/16212	0.638122	1.33538	6.17364	4.04722e-10	1.14021e-07	8.06734e-08	ENSMUSG00000036885/ENSMUSG00000033149/ENSMUSG00000020315/ENSMUSG00000003161/ENSMUSG00000074513/ENSMUSG00000020388/ENSMUSG00000021262/ENSMUSG00000000915/ENSMUSG00000021061/ENSMUSG00000021944/ENSMUSG00000026778/ENSMUSG00000005583/ENSMUSG00000078453/ENSMUSG00000019997/ENSMUSG00000039031/ENSMUSG00000028300/ENSMUSG00000066406/ENSMUSG00000030516/ENSMUSG00000038524/ENSMUSG00000024451/ENSMUSG00000029467/…	231
GO:0060070	canonical Wnt signaling pathway	180/7747	272/16212	0.661765	1.38486	6.12356	5.4064e-10	1.37662e-07	9.73998e-08	ENSMUSG00000022905/ENSMUSG00000022812/ENSMUSG00000056342/ENSMUSG00000028926/ENSMUSG00000044674/ENSMUSG00000006932/ENSMUSG00000031616/ENSMUSG00000044548/ENSMUSG00000021096/ENSMUSG00000027358/ENSMUSG00000027356/ENSMUSG00000015133/ENSMUSG00000060450/ENSMUSG00000024576/ENSMUSG00000018583/ENSMUSG00000030201/ENSMUSG00000045962/ENSMUSG00000030170/ENSMUSG00000061048/ENSMUSG00000019969/ENSMUSG00000035274/…	180
GO:0048193	Golgi vesicle transport	176/7747	265/16212	0.664151	1.38986	6.12133	5.46309e-10	1.37662e-07	9.73998e-08	ENSMUSG00000022829/ENSMUSG00000020149/ENSMUSG00000020128/ENSMUSG00000051355/ENSMUSG00000020315/ENSMUSG00000015653/ENSMUSG00000031684/ENSMUSG00000030245/ENSMUSG00000024487/ENSMUSG00000029462/ENSMUSG00000020375/ENSMUSG00000010154/ENSMUSG00000031916/ENSMUSG00000031731/ENSMUSG00000031950/ENSMUSG00000029616/ENSMUSG00000021248/ENSMUSG00000034973/ENSMUSG00000054455/ENSMUSG00000024247/ENSMUSG00000024127/…	176
GO:0043487	regulation of RNA stability	116/7747	162/16212	0.716049	1.49846	6.09974	5.55268e-10	1.37662e-07	9.73998e-08	ENSMUSG00000027770/ENSMUSG00000020464/ENSMUSG00000026728/ENSMUSG00000025962/ENSMUSG00000023087/ENSMUSG00000044595/ENSMUSG00000041477/ENSMUSG00000017478/ENSMUSG00000032265/ENSMUSG00000032423/ENSMUSG00000027510/ENSMUSG00000062078/ENSMUSG00000068823/ENSMUSG00000002227/ENSMUSG00000022283/ENSMUSG00000033075/ENSMUSG00000020166/ENSMUSG00000038542/ENSMUSG00000029423/ENSMUSG00000042650/ENSMUSG00000035960/…	116
GO:0141188	nucleic acid catabolic process	186/7747	283/16212	0.657244	1.3754	6.09471	6.53315e-10	1.5574e-07	1.10191e-07	ENSMUSG00000027770/ENSMUSG00000020128/ENSMUSG00000020464/ENSMUSG00000026728/ENSMUSG00000025962/ENSMUSG00000023087/ENSMUSG00000019977/ENSMUSG00000044595/ENSMUSG00000041477/ENSMUSG00000017478/ENSMUSG00000109941/ENSMUSG00000032265/ENSMUSG00000032423/ENSMUSG00000027510/ENSMUSG00000022774/ENSMUSG00000062078/ENSMUSG00000024234/ENSMUSG00000024360/ENSMUSG00000068823/ENSMUSG00000002227/ENSMUSG00000022283/…	186
GO:0060828	regulation of canonical Wnt signaling pathway	151/7747	222/16212	0.68018	1.4234	6.07661	7.04923e-10	1.61819e-07	1.14492e-07	ENSMUSG00000022905/ENSMUSG00000022812/ENSMUSG00000056342/ENSMUSG00000028926/ENSMUSG00000044674/ENSMUSG00000006932/ENSMUSG00000044548/ENSMUSG00000021096/ENSMUSG00000027358/ENSMUSG00000027356/ENSMUSG00000015133/ENSMUSG00000060450/ENSMUSG00000024576/ENSMUSG00000018583/ENSMUSG00000045962/ENSMUSG00000030170/ENSMUSG00000061048/ENSMUSG00000019969/ENSMUSG00000035274/ENSMUSG00000032419/ENSMUSG00000061130/…	151
GO:0001558	regulation of cell growth	249/7747	397/16212	0.627204	1.31254	6.03145	9.99145e-10	2.21168e-07	1.56483e-07	ENSMUSG00000022508/ENSMUSG00000026283/ENSMUSG00000022812/ENSMUSG00000038845/ENSMUSG00000049800/ENSMUSG00000000861/ENSMUSG00000020458/ENSMUSG00000001729/ENSMUSG00000021294/ENSMUSG00000019970/ENSMUSG00000029475/ENSMUSG00000028577/ENSMUSG00000070509/ENSMUSG00000024486/ENSMUSG00000024431/ENSMUSG00000030330/ENSMUSG00000008153/ENSMUSG00000003031/ENSMUSG00000030168/ENSMUSG00000006519/ENSMUSG00000031729/…	249
GO:0006417	regulation of translation	210/7747	327/16212	0.642202	1.34392	6.01036	1.12741e-09	2.40955e-07	1.70482e-07	ENSMUSG00000027770/ENSMUSG00000025962/ENSMUSG00000027993/ENSMUSG00000058355/ENSMUSG00000001729/ENSMUSG00000021282/ENSMUSG00000019977/ENSMUSG00000055652/ENSMUSG00000037058/ENSMUSG00000043991/ENSMUSG00000024608/ENSMUSG00000057666/ENSMUSG00000079036/ENSMUSG00000032423/ENSMUSG00000022774/ENSMUSG00000062078/ENSMUSG00000026740/ENSMUSG00000024360/ENSMUSG00000068823/ENSMUSG00000068739/ENSMUSG00000022283/…	210
GO:0051493	regulation of cytoskeleton organization	298/7747	490/16212	0.608163	1.27269	5.86373	2.8072e-09	5.62463e-07	3.97959e-07	ENSMUSG00000036885/ENSMUSG00000022812/ENSMUSG00000033149/ENSMUSG00000020315/ENSMUSG00000074513/ENSMUSG00000020388/ENSMUSG00000018707/ENSMUSG00000021262/ENSMUSG00000000915/ENSMUSG00000021061/ENSMUSG00000049550/ENSMUSG00000026778/ENSMUSG00000005583/ENSMUSG00000019970/ENSMUSG00000019997/ENSMUSG00000039031/ENSMUSG00000028300/ENSMUSG00000066406/ENSMUSG00000030516/ENSMUSG00000029468/ENSMUSG00000024456/…	298
GO:0030307	positive regulation of cell growth	125/7747	180/16212	0.694444	1.45325	5.84977	2.81322e-09	5.62463e-07	3.97959e-07	ENSMUSG00000022812/ENSMUSG00000000861/ENSMUSG00000001729/ENSMUSG00000019970/ENSMUSG00000029475/ENSMUSG00000028577/ENSMUSG00000024486/ENSMUSG00000024431/ENSMUSG00000006519/ENSMUSG00000031729/ENSMUSG00000004788/ENSMUSG00000029602/ENSMUSG00000025810/ENSMUSG00000027859/ENSMUSG00000020476/ENSMUSG00000057329/ENSMUSG00000067336/ENSMUSG00000036023/ENSMUSG00000059363/ENSMUSG00000018820/ENSMUSG00000026965/…	125
GO:0090287	regulation of cellular response to growth factor stimulus	189/7747	292/16212	0.64726	1.35451	5.84798	3.04317e-09	5.89424e-07	4.17034e-07	ENSMUSG00000022816/ENSMUSG00000045671/ENSMUSG00000026768/ENSMUSG00000044674/ENSMUSG00000006932/ENSMUSG00000064325/ENSMUSG00000048118/ENSMUSG00000021096/ENSMUSG00000021109/ENSMUSG00000027358/ENSMUSG00000027356/ENSMUSG00000021944/ENSMUSG00000039910/ENSMUSG00000070509/ENSMUSG00000024427/ENSMUSG00000036585/ENSMUSG00000061048/ENSMUSG00000003316/ENSMUSG00000021253/ENSMUSG00000033960/ENSMUSG00000024238/…	189
GO:0060537	muscle tissue development	280/7747	458/16212	0.611354	1.27937	5.80193	4.07238e-09	7.64867e-07	5.41166e-07	ENSMUSG00000025958/ENSMUSG00000027763/ENSMUSG00000022812/ENSMUSG00000034064/ENSMUSG00000022687/ENSMUSG00000020160/ENSMUSG00000020128/ENSMUSG00000026768/ENSMUSG00000006932/ENSMUSG00000031616/ENSMUSG00000031681/ENSMUSG00000051367/ENSMUSG00000027966/ENSMUSG00000027358/ENSMUSG00000027346/ENSMUSG00000021944/ENSMUSG00000030247/ENSMUSG00000030249/ENSMUSG00000030265/ENSMUSG00000005583/ENSMUSG00000039910/…	280
GO:0043161	proteasome-mediated ubiquitin-dependent protein catabolic process	252/7747	407/16212	0.619165	1.29571	5.78003	4.64104e-09	8.46034e-07	5.98593e-07	ENSMUSG00000026308/ENSMUSG00000022812/ENSMUSG00000051355/ENSMUSG00000020290/ENSMUSG00000006932/ENSMUSG00000027993/ENSMUSG00000038250/ENSMUSG00000001729/ENSMUSG00000037904/ENSMUSG00000017843/ENSMUSG00000020948/ENSMUSG00000060073/ENSMUSG00000021694/ENSMUSG00000021589/ENSMUSG00000028577/ENSMUSG00000029474/ENSMUSG00000020794/ENSMUSG00000029472/ENSMUSG00000057719/ENSMUSG00000029466/ENSMUSG00000024576/…	252
GO:0006892	post-Golgi vesicle-mediated transport	75/7747	98/16212	0.765306	1.60154	5.71393	5.23135e-09	9.26397e-07	6.55452e-07	ENSMUSG00000022829/ENSMUSG00000020128/ENSMUSG00000051355/ENSMUSG00000020315/ENSMUSG00000015653/ENSMUSG00000029462/ENSMUSG00000031731/ENSMUSG00000034973/ENSMUSG00000024247/ENSMUSG00000024127/ENSMUSG00000068747/ENSMUSG00000073002/ENSMUSG00000069601/ENSMUSG00000031447/ENSMUSG00000020536/ENSMUSG00000024480/ENSMUSG00000027799/ENSMUSG00000026672/ENSMUSG00000038671/ENSMUSG00000024065/ENSMUSG00000024069/…	75
GO:1901987	regulation of cell cycle phase transition	252/7747	408/16212	0.617647	1.29254	5.72516	6.43183e-09	1.10735e-06	7.8348e-07	ENSMUSG00000032409/ENSMUSG00000022510/ENSMUSG00000049502/ENSMUSG00000016984/ENSMUSG00000063275/ENSMUSG00000028926/ENSMUSG00000040274/ENSMUSG00000032555/ENSMUSG00000020380/ENSMUSG00000001729/ENSMUSG00000017843/ENSMUSG00000044548/ENSMUSG00000059970/ENSMUSG00000029414/ENSMUSG00000029438/ENSMUSG00000026778/ENSMUSG00000029472/ENSMUSG00000029466/ENSMUSG00000024621/ENSMUSG00000030330/ENSMUSG00000004266/…	252
GO:0044770	cell cycle phase transition	300/7747	497/16212	0.603622	1.26319	5.70092	7.40777e-09	1.2409e-06	8.77974e-07	ENSMUSG00000032409/ENSMUSG00000022510/ENSMUSG00000049502/ENSMUSG00000016984/ENSMUSG00000063275/ENSMUSG00000028926/ENSMUSG00000040274/ENSMUSG00000032555/ENSMUSG00000020380/ENSMUSG00000001729/ENSMUSG00000017843/ENSMUSG00000044548/ENSMUSG00000059970/ENSMUSG00000029414/ENSMUSG00000029438/ENSMUSG00000026778/ENSMUSG00000019982/ENSMUSG00000029472/ENSMUSG00000029466/ENSMUSG00000024621/ENSMUSG00000024617/…	300
GO:0048568	embryonic organ development	291/7747	481/16212	0.60499	1.26605	5.66652	9.06809e-09	1.47905e-06	1.04647e-06	ENSMUSG00000005917/ENSMUSG00000020467/ENSMUSG00000026768/ENSMUSG00000006932/ENSMUSG00000031616/ENSMUSG00000031714/ENSMUSG00000018395/ENSMUSG00000001729/ENSMUSG00000051367/ENSMUSG00000021109/ENSMUSG00000027966/ENSMUSG00000021944/ENSMUSG00000005583/ENSMUSG00000039910/ENSMUSG00000019982/ENSMUSG00000045680/ENSMUSG00000010461/ENSMUSG00000029475/ENSMUSG00000015134/ENSMUSG00000024497/ENSMUSG00000024620/…	291
GO:0080135	regulation of cellular response to stress	295/7747	489/16212	0.603272	1.26246	5.63769	1.07241e-08	1.70431e-06	1.20585e-06	ENSMUSG00000032409/ENSMUSG00000026278/ENSMUSG00000026277/ENSMUSG00000034206/ENSMUSG00000016984/ENSMUSG00000045671/ENSMUSG00000020152/ENSMUSG00000051355/ENSMUSG00000020463/ENSMUSG00000020458/ENSMUSG00000027737/ENSMUSG00000040865/ENSMUSG00000029438/ENSMUSG00000021694/ENSMUSG00000010461/ENSMUSG00000070509/ENSMUSG00000075701/ENSMUSG00000024456/ENSMUSG00000030330/ENSMUSG00000004270/ENSMUSG00000030189/…	295
GO:0090100	positive regulation of transmembrane receptor protein serine/threonine kinase signaling pathway	73/7747	96/16212	0.760417	1.59131	5.55879	1.3604e-08	2.10794e-06	1.49143e-06	ENSMUSG00000026768/ENSMUSG00000027358/ENSMUSG00000027356/ENSMUSG00000021944/ENSMUSG00000039910/ENSMUSG00000021253/ENSMUSG00000008999/ENSMUSG00000067336/ENSMUSG00000025190/ENSMUSG00000056004/ENSMUSG00000061436/ENSMUSG00000020802/ENSMUSG00000023944/ENSMUSG00000026872/ENSMUSG00000005836/ENSMUSG00000042275/ENSMUSG00000048450/ENSMUSG00000048001/ENSMUSG00000030733/ENSMUSG00000000532/ENSMUSG00000000530/…	73
GO:0048562	embryonic organ morphogenesis	194/7747	305/16212	0.636066	1.33108	5.58406	1.46469e-08	2.18835e-06	1.54832e-06	ENSMUSG00000005917/ENSMUSG00000020467/ENSMUSG00000026768/ENSMUSG00000006932/ENSMUSG00000031616/ENSMUSG00000018395/ENSMUSG00000051367/ENSMUSG00000021109/ENSMUSG00000027966/ENSMUSG00000021944/ENSMUSG00000005583/ENSMUSG00000039910/ENSMUSG00000045680/ENSMUSG00000010461/ENSMUSG00000029475/ENSMUSG00000015134/ENSMUSG00000024497/ENSMUSG00000054008/ENSMUSG00000030201/ENSMUSG00000042812/ENSMUSG00000021253/…	194
GO:0048639	positive regulation of developmental growth	133/7747	197/16212	0.675127	1.41283	5.57692	1.48291e-08	2.18835e-06	1.54832e-06	ENSMUSG00000025958/ENSMUSG00000022812/ENSMUSG00000000861/ENSMUSG00000001729/ENSMUSG00000021944/ENSMUSG00000005583/ENSMUSG00000028577/ENSMUSG00000024431/ENSMUSG00000005069/ENSMUSG00000030189/ENSMUSG00000031729/ENSMUSG00000004788/ENSMUSG00000029602/ENSMUSG00000052397/ENSMUSG00000025810/ENSMUSG00000027859/ENSMUSG00000014599/ENSMUSG00000020476/ENSMUSG00000057329/ENSMUSG00000067336/ENSMUSG00000036023/…	133
GO:0031669	cellular response to nutrient levels	163/7747	250/16212	0.652	1.36443	5.55516	1.71831e-08	2.47676e-06	1.75238e-06	ENSMUSG00000026280/ENSMUSG00000051980/ENSMUSG00000035992/ENSMUSG00000037526/ENSMUSG00000059436/ENSMUSG00000071369/ENSMUSG00000024493/ENSMUSG00000024576/ENSMUSG00000030161/ENSMUSG00000001518/ENSMUSG00000022462/ENSMUSG00000040010/ENSMUSG00000031950/ENSMUSG00000031959/ENSMUSG00000042628/ENSMUSG00000028278/ENSMUSG00000027513/ENSMUSG00000026775/ENSMUSG00000027840/ENSMUSG00000040412/ENSMUSG00000031668/…	163
GO:0006914	autophagy	280/7747	463/16212	0.604752	1.26555	5.5459	1.82349e-08	2.51155e-06	1.77699e-06	ENSMUSG00000026280/ENSMUSG00000026278/ENSMUSG00000047443/ENSMUSG00000022812/ENSMUSG00000020149/ENSMUSG00000032557/ENSMUSG00000028080/ENSMUSG00000020402/ENSMUSG00000001729/ENSMUSG00000037526/ENSMUSG00000021109/ENSMUSG00000021944/ENSMUSG00000029434/ENSMUSG00000001630/ENSMUSG00000019850/ENSMUSG00000050473/ENSMUSG00000028300/ENSMUSG00000028577/ENSMUSG00000028165/ENSMUSG00000029467/ENSMUSG00000024442/…	280
GO:0061919	process utilizing autophagic mechanism	280/7747	463/16212	0.604752	1.26555	5.5459	1.82349e-08	2.51155e-06	1.77699e-06	ENSMUSG00000026280/ENSMUSG00000026278/ENSMUSG00000047443/ENSMUSG00000022812/ENSMUSG00000020149/ENSMUSG00000032557/ENSMUSG00000028080/ENSMUSG00000020402/ENSMUSG00000001729/ENSMUSG00000037526/ENSMUSG00000021109/ENSMUSG00000021944/ENSMUSG00000029434/ENSMUSG00000001630/ENSMUSG00000019850/ENSMUSG00000050473/ENSMUSG00000028300/ENSMUSG00000028577/ENSMUSG00000028165/ENSMUSG00000029467/ENSMUSG00000024442/…	280
GO:0032535	regulation of cellular component size	225/7747	362/16212	0.621547	1.3007	5.53517	1.94565e-08	2.62155e-06	1.85482e-06	ENSMUSG00000025958/ENSMUSG00000022812/ENSMUSG00000000861/ENSMUSG00000020458/ENSMUSG00000020315/ENSMUSG00000001729/ENSMUSG00000037679/ENSMUSG00000021270/ENSMUSG00000021262/ENSMUSG00000000915/ENSMUSG00000021061/ENSMUSG00000026317/ENSMUSG00000039031/ENSMUSG00000070509/ENSMUSG00000029468/ENSMUSG00000038524/ENSMUSG00000024493/ENSMUSG00000029465/ENSMUSG00000042992/ENSMUSG00000024101/ENSMUSG00000030109/…	225
GO:0006397	mRNA processing	272/7747	449/16212	0.605791	1.26773	5.50368	2.32179e-08	3.06179e-06	2.16631e-06	ENSMUSG00000027763/ENSMUSG00000027770/ENSMUSG00000020273/ENSMUSG00000020464/ENSMUSG00000029404/ENSMUSG00000060950/ENSMUSG00000035597/ENSMUSG00000027981/ENSMUSG00000029427/ENSMUSG00000022185/ENSMUSG00000037197/ENSMUSG00000064138/ENSMUSG00000030512/ENSMUSG00000001383/ENSMUSG00000024498/ENSMUSG00000024604/ENSMUSG00000030204/ENSMUSG00000021210/ENSMUSG00000010608/ENSMUSG00000032423/ENSMUSG00000028274/…	272
GO:0042692	muscle cell differentiation	264/7747	435/16212	0.606897	1.27004	5.4616	2.949e-08	3.80789e-06	2.69419e-06	ENSMUSG00000022812/ENSMUSG00000020160/ENSMUSG00000063275/ENSMUSG00000026768/ENSMUSG00000006932/ENSMUSG00000031616/ENSMUSG00000031681/ENSMUSG00000001729/ENSMUSG00000051367/ENSMUSG00000027358/ENSMUSG00000021944/ENSMUSG00000030247/ENSMUSG00000030265/ENSMUSG00000005583/ENSMUSG00000066406/ENSMUSG00000030557/ENSMUSG00000024454/ENSMUSG00000029467/ENSMUSG00000024431/ENSMUSG00000024621/ENSMUSG00000024620/…	264
GO:0014706	striated muscle tissue development	265/7747	437/16212	0.606407	1.26902	5.45374	3.08243e-08	3.89897e-06	2.75863e-06	ENSMUSG00000025958/ENSMUSG00000027763/ENSMUSG00000022812/ENSMUSG00000022687/ENSMUSG00000020160/ENSMUSG00000020128/ENSMUSG00000006932/ENSMUSG00000031616/ENSMUSG00000031681/ENSMUSG00000051367/ENSMUSG00000027966/ENSMUSG00000027358/ENSMUSG00000027346/ENSMUSG00000021944/ENSMUSG00000030247/ENSMUSG00000030249/ENSMUSG00000030265/ENSMUSG00000005583/ENSMUSG00000039910/ENSMUSG00000045680/ENSMUSG00000066406/…	265
GO:0007389	pattern specification process	267/7747	441/16212	0.605442	1.267	5.4382	3.36333e-08	4.16918e-06	2.94982e-06	ENSMUSG00000022510/ENSMUSG00000034064/ENSMUSG00000020160/ENSMUSG00000005917/ENSMUSG00000006932/ENSMUSG00000031616/ENSMUSG00000031681/ENSMUSG00000064325/ENSMUSG00000018395/ENSMUSG00000051367/ENSMUSG00000021109/ENSMUSG00000027358/ENSMUSG00000021944/ENSMUSG00000069171/ENSMUSG00000005583/ENSMUSG00000039910/ENSMUSG00000029475/ENSMUSG00000028576/ENSMUSG00000032640/ENSMUSG00000030513/ENSMUSG00000036585/…	267
GO:0009267	cellular response to starvation	125/7747	185/16212	0.675676	1.41397	5.4174	3.70987e-08	4.50858e-06	3.18995e-06	ENSMUSG00000026280/ENSMUSG00000035992/ENSMUSG00000037526/ENSMUSG00000059436/ENSMUSG00000071369/ENSMUSG00000024493/ENSMUSG00000030161/ENSMUSG00000001518/ENSMUSG00000022462/ENSMUSG00000040010/ENSMUSG00000031950/ENSMUSG00000031959/ENSMUSG00000042628/ENSMUSG00000028278/ENSMUSG00000027513/ENSMUSG00000026775/ENSMUSG00000027840/ENSMUSG00000040412/ENSMUSG00000031668/ENSMUSG00000057329/ENSMUSG00000047496/…	125
GO:0003002	regionalization	244/7747	399/16212	0.611529	1.27973	5.41233	3.89821e-08	4.64636e-06	3.28744e-06	ENSMUSG00000022510/ENSMUSG00000034064/ENSMUSG00000005917/ENSMUSG00000006932/ENSMUSG00000031616/ENSMUSG00000064325/ENSMUSG00000018395/ENSMUSG00000051367/ENSMUSG00000021109/ENSMUSG00000027358/ENSMUSG00000021944/ENSMUSG00000069171/ENSMUSG00000005583/ENSMUSG00000039910/ENSMUSG00000029475/ENSMUSG00000028576/ENSMUSG00000032640/ENSMUSG00000030513/ENSMUSG00000036585/ENSMUSG00000038593/ENSMUSG00000030201/…	244
GO:0016050	vesicle organization	209/7747	335/16212	0.623881	1.30558	5.40662	4.035e-08	4.71866e-06	3.33859e-06	ENSMUSG00000025958/ENSMUSG00000052459/ENSMUSG00000020149/ENSMUSG00000026718/ENSMUSG00000032560/ENSMUSG00000018398/ENSMUSG00000050473/ENSMUSG00000071359/ENSMUSG00000019998/ENSMUSG00000029468/ENSMUSG00000024487/ENSMUSG00000020375/ENSMUSG00000030337/ENSMUSG00000072770/ENSMUSG00000024101/ENSMUSG00000030172/ENSMUSG00000019210/ENSMUSG00000031731/ENSMUSG00000029608/ENSMUSG00000021248/ENSMUSG00000033419/…	209
GO:0071826	protein-RNA complex organization	115/7747	168/16212	0.684524	1.43249	5.39054	4.27851e-08	4.91078e-06	3.47452e-06	ENSMUSG00000032409/ENSMUSG00000027763/ENSMUSG00000025962/ENSMUSG00000021288/ENSMUSG00000021282/ENSMUSG00000021270/ENSMUSG00000035597/ENSMUSG00000023106/ENSMUSG00000024608/ENSMUSG00000058006/ENSMUSG00000001767/ENSMUSG00000006740/ENSMUSG00000027905/ENSMUSG00000056305/ENSMUSG00000028484/ENSMUSG00000028495/ENSMUSG00000018974/ENSMUSG00000002455/ENSMUSG00000029823/ENSMUSG00000036376/ENSMUSG00000057322/…	115
GO:0031329	regulation of cellular catabolic process	226/7747	367/16212	0.615804	1.28868	5.35135	5.48508e-08	6.18119e-06	4.37337e-06	ENSMUSG00000026278/ENSMUSG00000037936/ENSMUSG00000047443/ENSMUSG00000027761/ENSMUSG00000049502/ENSMUSG00000022812/ENSMUSG00000022708/ENSMUSG00000028082/ENSMUSG00000020402/ENSMUSG00000001729/ENSMUSG00000037526/ENSMUSG00000021109/ENSMUSG00000021944/ENSMUSG00000001630/ENSMUSG00000019850/ENSMUSG00000050473/ENSMUSG00000028300/ENSMUSG00000070509/ENSMUSG00000028165/ENSMUSG00000029468/ENSMUSG00000024442/…	226
GO:0050807	regulation of synapse organization	215/7747	347/16212	0.619597	1.29662	5.34319	5.74459e-08	6.35803e-06	4.49849e-06	ENSMUSG00000022514/ENSMUSG00000014602/ENSMUSG00000027770/ENSMUSG00000022812/ENSMUSG00000022790/ENSMUSG00000022656/ENSMUSG00000020152/ENSMUSG00000020458/ENSMUSG00000049630/ENSMUSG00000044674/ENSMUSG00000006932/ENSMUSG00000027737/ENSMUSG00000001729/ENSMUSG00000044548/ENSMUSG00000051367/ENSMUSG00000005583/ENSMUSG00000025789/ENSMUSG00000060275/ENSMUSG00000063870/ENSMUSG00000008153/ENSMUSG00000030350/…	215
GO:0021915	neural tube development	121/7747	179/16212	0.675978	1.41461	5.33596	5.8682e-08	6.38089e-06	4.51466e-06	ENSMUSG00000018395/ENSMUSG00000044548/ENSMUSG00000021109/ENSMUSG00000021048/ENSMUSG00000039910/ENSMUSG00000029475/ENSMUSG00000070509/ENSMUSG00000038593/ENSMUSG00000030201/ENSMUSG00000019969/ENSMUSG00000028284/ENSMUSG00000008999/ENSMUSG00000026739/ENSMUSG00000060733/ENSMUSG00000021466/ENSMUSG00000001052/ENSMUSG00000023972/ENSMUSG00000040506/ENSMUSG00000038122/ENSMUSG00000035247/ENSMUSG00000026872/…	121
GO:0090092	regulation of transmembrane receptor protein serine/threonine kinase signaling pathway	156/7747	241/16212	0.647303	1.3546	5.30564	7.06554e-08	7.55039e-06	5.34211e-06	ENSMUSG00000022816/ENSMUSG00000045671/ENSMUSG00000026768/ENSMUSG00000044674/ENSMUSG00000048118/ENSMUSG00000021096/ENSMUSG00000027358/ENSMUSG00000027356/ENSMUSG00000021944/ENSMUSG00000039910/ENSMUSG00000070509/ENSMUSG00000061048/ENSMUSG00000003316/ENSMUSG00000021253/ENSMUSG00000008999/ENSMUSG00000024238/ENSMUSG00000033014/ENSMUSG00000039985/ENSMUSG00000022114/ENSMUSG00000066900/ENSMUSG00000045969/…	156
GO:0007015	actin filament organization	258/7747	427/16212	0.604215	1.26443	5.29738	7.35469e-08	7.71025e-06	5.45522e-06	ENSMUSG00000033149/ENSMUSG00000020152/ENSMUSG00000020315/ENSMUSG00000050530/ENSMUSG00000041842/ENSMUSG00000074513/ENSMUSG00000020388/ENSMUSG00000037679/ENSMUSG00000021262/ENSMUSG00000000915/ENSMUSG00000021061/ENSMUSG00000026778/ENSMUSG00000019997/ENSMUSG00000039031/ENSMUSG00000028300/ENSMUSG00000030516/ENSMUSG00000024456/ENSMUSG00000038524/ENSMUSG00000029465/ENSMUSG00000024501/ENSMUSG00000033871/…	258
GO:0010638	positive regulation of organelle organization	295/7747	496/16212	0.594758	1.24464	5.29363	7.46394e-08	7.71025e-06	5.45522e-06	ENSMUSG00000032409/ENSMUSG00000026278/ENSMUSG00000027770/ENSMUSG00000022812/ENSMUSG00000007739/ENSMUSG00000006932/ENSMUSG00000020388/ENSMUSG00000020380/ENSMUSG00000064326/ENSMUSG00000018707/ENSMUSG00000021262/ENSMUSG00000040865/ENSMUSG00000000915/ENSMUSG00000021109/ENSMUSG00000049550/ENSMUSG00000026778/ENSMUSG00000019997/ENSMUSG00000029472/ENSMUSG00000029468/ENSMUSG00000038524/ENSMUSG00000029466/…	295
GO:0030177	positive regulation of Wnt signaling pathway	92/7747	130/16212	0.707692	1.48097	5.26722	8.28987e-08	8.42305e-06	5.95955e-06	ENSMUSG00000056342/ENSMUSG00000044548/ENSMUSG00000021096/ENSMUSG00000027358/ENSMUSG00000019850/ENSMUSG00000015133/ENSMUSG00000045962/ENSMUSG00000030170/ENSMUSG00000061048/ENSMUSG00000061130/ENSMUSG00000030309/ENSMUSG00000033952/ENSMUSG00000032702/ENSMUSG00000021464/ENSMUSG00000078202/ENSMUSG00000028017/ENSMUSG00000023972/ENSMUSG00000028871/ENSMUSG00000021754/ENSMUSG00000026872/ENSMUSG00000024121/…	92
GO:0050803	regulation of synapse structure or activity	218/7747	354/16212	0.615819	1.28871	5.25415	9.36585e-08	9.2484e-06	6.54351e-06	ENSMUSG00000022514/ENSMUSG00000014602/ENSMUSG00000027770/ENSMUSG00000022812/ENSMUSG00000022790/ENSMUSG00000022656/ENSMUSG00000020152/ENSMUSG00000020458/ENSMUSG00000049630/ENSMUSG00000044674/ENSMUSG00000006932/ENSMUSG00000027737/ENSMUSG00000001729/ENSMUSG00000044548/ENSMUSG00000051367/ENSMUSG00000005583/ENSMUSG00000025789/ENSMUSG00000060275/ENSMUSG00000063870/ENSMUSG00000008153/ENSMUSG00000030350/…	218
GO:0141091	transforming growth factor beta receptor superfamily signaling pathway	195/7747	312/16212	0.625	1.30793	5.25391	9.4006e-08	9.2484e-06	6.54351e-06	ENSMUSG00000025958/ENSMUSG00000022816/ENSMUSG00000045671/ENSMUSG00000026768/ENSMUSG00000044674/ENSMUSG00000031681/ENSMUSG00000048118/ENSMUSG00000021096/ENSMUSG00000027358/ENSMUSG00000027356/ENSMUSG00000021944/ENSMUSG00000039910/ENSMUSG00000070509/ENSMUSG00000061048/ENSMUSG00000003316/ENSMUSG00000021253/ENSMUSG00000028284/ENSMUSG00000008999/ENSMUSG00000024238/ENSMUSG00000038418/ENSMUSG00000033014/…	195
GO:0007178	cell surface receptor protein serine/threonine kinase signaling pathway	207/7747	335/16212	0.61791	1.29309	5.18557	1.35963e-07	1.31672e-05	9.31616e-06	ENSMUSG00000025958/ENSMUSG00000022816/ENSMUSG00000045671/ENSMUSG00000020315/ENSMUSG00000026768/ENSMUSG00000044674/ENSMUSG00000031681/ENSMUSG00000048118/ENSMUSG00000021096/ENSMUSG00000027358/ENSMUSG00000027356/ENSMUSG00000021944/ENSMUSG00000039910/ENSMUSG00000039166/ENSMUSG00000070509/ENSMUSG00000061048/ENSMUSG00000003316/ENSMUSG00000021253/ENSMUSG00000028284/ENSMUSG00000008999/ENSMUSG00000024238/…	207
GO:0022618	protein-RNA complex assembly	110/7747	162/16212	0.679012	1.42096	5.15128	1.61804e-07	1.54286e-05	1.09162e-05	ENSMUSG00000032409/ENSMUSG00000027763/ENSMUSG00000025962/ENSMUSG00000021282/ENSMUSG00000021270/ENSMUSG00000035597/ENSMUSG00000023106/ENSMUSG00000024608/ENSMUSG00000058006/ENSMUSG00000001767/ENSMUSG00000027905/ENSMUSG00000056305/ENSMUSG00000028484/ENSMUSG00000028495/ENSMUSG00000018974/ENSMUSG00000002455/ENSMUSG00000029823/ENSMUSG00000036376/ENSMUSG00000057322/ENSMUSG00000046756/ENSMUSG00000040140/…	110
GO:0009895	negative regulation of catabolic process	205/7747	332/16212	0.61747	1.29217	5.14557	1.68526e-07	1.58262e-05	1.11975e-05	ENSMUSG00000047443/ENSMUSG00000027770/ENSMUSG00000038845/ENSMUSG00000001467/ENSMUSG00000038250/ENSMUSG00000023087/ENSMUSG00000001729/ENSMUSG00000049241/ENSMUSG00000045502/ENSMUSG00000021944/ENSMUSG00000001630/ENSMUSG00000019850/ENSMUSG00000044595/ENSMUSG00000024101/ENSMUSG00000045962/ENSMUSG00000031823/ENSMUSG00000040010/ENSMUSG00000025316/ENSMUSG00000003849/ENSMUSG00000031950/ENSMUSG00000019969/…	205
GO:0001667	ameboidal-type cell migration	159/7747	249/16212	0.638554	1.33629	5.11582	1.98513e-07	1.80938e-05	1.28019e-05	ENSMUSG00000020458/ENSMUSG00000026728/ENSMUSG00000031616/ENSMUSG00000001729/ENSMUSG00000021262/ENSMUSG00000021109/ENSMUSG00000027356/ENSMUSG00000024486/ENSMUSG00000055333/ENSMUSG00000030201/ENSMUSG00000030168/ENSMUSG00000001672/ENSMUSG00000043733/ENSMUSG00000035274/ENSMUSG00000027524/ENSMUSG00000008999/ENSMUSG00000024277/ENSMUSG00000022783/ENSMUSG00000025810/ENSMUSG00000019947/ENSMUSG00000038894/…	159
GO:0034976	response to endoplasmic reticulum stress	159/7747	249/16212	0.638554	1.33629	5.11582	1.98513e-07	1.80938e-05	1.28019e-05	ENSMUSG00000026278/ENSMUSG00000022812/ENSMUSG00000032557/ENSMUSG00000002190/ENSMUSG00000049470/ENSMUSG00000005078/ENSMUSG00000030247/ENSMUSG00000071369/ENSMUSG00000075701/ENSMUSG00000004270/ENSMUSG00000004446/ENSMUSG00000029616/ENSMUSG00000020964/ENSMUSG00000028277/ENSMUSG00000054455/ENSMUSG00000031668/ENSMUSG00000052656/ENSMUSG00000075000/ENSMUSG00000057329/ENSMUSG00000022789/ENSMUSG00000053334/…	159
GO:0007411	axon guidance	145/7747	224/16212	0.647321	1.35464	5.11293	2.0155e-07	1.81045e-05	1.28094e-05	ENSMUSG00000022687/ENSMUSG00000051650/ENSMUSG00000031616/ENSMUSG00000021262/ENSMUSG00000048251/ENSMUSG00000005583/ENSMUSG00000024456/ENSMUSG00000024497/ENSMUSG00000024621/ENSMUSG00000049107/ENSMUSG00000055003/ENSMUSG00000027524/ENSMUSG00000008999/ENSMUSG00000006740/ENSMUSG00000025810/ENSMUSG00000024366/ENSMUSG00000037868/ENSMUSG00000069601/ENSMUSG00000055022/ENSMUSG00000067336/ENSMUSG00000021466/…	145
GO:0043547	positive regulation of GTPase activity	101/7747	147/16212	0.687075	1.43783	5.1013	2.1056e-07	1.86435e-05	1.31908e-05	ENSMUSG00000022812/ENSMUSG00000026727/ENSMUSG00000037533/ENSMUSG00000028300/ENSMUSG00000070509/ENSMUSG00000024451/ENSMUSG00000024493/ENSMUSG00000049107/ENSMUSG00000021215/ENSMUSG00000042700/ENSMUSG00000002365/ENSMUSG00000024277/ENSMUSG00000033763/ENSMUSG00000022469/ENSMUSG00000019920/ENSMUSG00000049323/ENSMUSG00000026024/ENSMUSG00000039046/ENSMUSG00000004530/ENSMUSG00000052632/ENSMUSG00000062232/…	101
GO:0006260	DNA replication	156/7747	244/16212	0.639344	1.33794	5.08829	2.29871e-07	2.00668e-05	1.41978e-05	ENSMUSG00000032409/ENSMUSG00000068428/ENSMUSG00000026283/ENSMUSG00000026309/ENSMUSG00000034206/ENSMUSG00000016984/ENSMUSG00000032555/ENSMUSG00000020380/ENSMUSG00000055884/ENSMUSG00000040865/ENSMUSG00000027353/ENSMUSG00000043991/ENSMUSG00000035842/ENSMUSG00000006585/ENSMUSG00000033596/ENSMUSG00000040044/ENSMUSG00000027502/ENSMUSG00000022673/ENSMUSG00000031669/ENSMUSG00000037855/ENSMUSG00000029363/…	156
GO:0019827	stem cell population maintenance	125/7747	189/16212	0.661376	1.38405	5.08046	2.38943e-07	2.0569e-05	1.45532e-05	ENSMUSG00000022510/ENSMUSG00000002679/ENSMUSG00000048118/ENSMUSG00000029438/ENSMUSG00000041133/ENSMUSG00000030291/ENSMUSG00000029475/ENSMUSG00000030353/ENSMUSG00000008999/ENSMUSG00000028640/ENSMUSG00000026775/ENSMUSG00000018604/ENSMUSG00000040389/ENSMUSG00000031671/ENSMUSG00000026976/ENSMUSG00000053470/ENSMUSG00000055799/ENSMUSG00000039985/ENSMUSG00000020166/ENSMUSG00000066900/ENSMUSG00000049717/…	125
GO:1903829	positive regulation of protein localization	293/7747	497/16212	0.589537	1.23371	5.06247	2.57111e-07	2.16368e-05	1.53086e-05	ENSMUSG00000049502/ENSMUSG00000051980/ENSMUSG00000022812/ENSMUSG00000051355/ENSMUSG00000007739/ENSMUSG00000020458/ENSMUSG00000020315/ENSMUSG00000040537/ENSMUSG00000003161/ENSMUSG00000018395/ENSMUSG00000001729/ENSMUSG00000021270/ENSMUSG00000021096/ENSMUSG00000034435/ENSMUSG00000021109/ENSMUSG00000021057/ENSMUSG00000045502/ENSMUSG00000040234/ENSMUSG00000026778/ENSMUSG00000021587/ENSMUSG00000050473/…	293
GO:0007346	regulation of mitotic cell cycle	269/7747	452/16212	0.595133	1.24542	5.06249	2.58329e-07	2.16368e-05	1.53086e-05	ENSMUSG00000032409/ENSMUSG00000016984/ENSMUSG00000063275/ENSMUSG00000040274/ENSMUSG00000006932/ENSMUSG00000032555/ENSMUSG00000037544/ENSMUSG00000020380/ENSMUSG00000001729/ENSMUSG00000017843/ENSMUSG00000044548/ENSMUSG00000059970/ENSMUSG00000029414/ENSMUSG00000029438/ENSMUSG00000026778/ENSMUSG00000029472/ENSMUSG00000006050/ENSMUSG00000024454/ENSMUSG00000029466/ENSMUSG00000024620/ENSMUSG00000004266/…	269
GO:0051056	regulation of small GTPase mediated signal transduction	145/7747	225/16212	0.644444	1.34862	5.03749	3.00828e-07	2.45333e-05	1.7358e-05	ENSMUSG00000022508/ENSMUSG00000020458/ENSMUSG00000030265/ENSMUSG00000019852/ENSMUSG00000039031/ENSMUSG00000066406/ENSMUSG00000024347/ENSMUSG00000024427/ENSMUSG00000024576/ENSMUSG00000024620/ENSMUSG00000001517/ENSMUSG00000040797/ENSMUSG00000021215/ENSMUSG00000042700/ENSMUSG00000029602/ENSMUSG00000095677/ENSMUSG00000024277/ENSMUSG00000041225/ENSMUSG00000025810/ENSMUSG00000027859/ENSMUSG00000014599/…	145
GO:0097485	neuron projection guidance	145/7747	225/16212	0.644444	1.34862	5.03749	3.00828e-07	2.45333e-05	1.7358e-05	ENSMUSG00000022687/ENSMUSG00000051650/ENSMUSG00000031616/ENSMUSG00000021262/ENSMUSG00000048251/ENSMUSG00000005583/ENSMUSG00000024456/ENSMUSG00000024497/ENSMUSG00000024621/ENSMUSG00000049107/ENSMUSG00000055003/ENSMUSG00000027524/ENSMUSG00000008999/ENSMUSG00000006740/ENSMUSG00000025810/ENSMUSG00000024366/ENSMUSG00000037868/ENSMUSG00000069601/ENSMUSG00000055022/ENSMUSG00000067336/ENSMUSG00000021466/…	145
GO:0006979	response to oxidative stress	238/7747	395/16212	0.602532	1.26091	5.02203	3.21174e-07	2.52438e-05	1.78607e-05	ENSMUSG00000026277/ENSMUSG00000020283/ENSMUSG00000064090/ENSMUSG00000020464/ENSMUSG00000031616/ENSMUSG00000031714/ENSMUSG00000027737/ENSMUSG00000001729/ENSMUSG00000021109/ENSMUSG00000042808/ENSMUSG00000041671/ENSMUSG00000030249/ENSMUSG00000021694/ENSMUSG00000019850/ENSMUSG00000071369/ENSMUSG00000075701/ENSMUSG00000029467/ENSMUSG00000033871/ENSMUSG00000024620/ENSMUSG00000005069/ENSMUSG00000030166/…	238
GO:0000375	RNA splicing, via transesterification reactions	171/7747	272/16212	0.628676	1.31562	5.02183	3.25831e-07	2.52438e-05	1.78607e-05	ENSMUSG00000027763/ENSMUSG00000035597/ENSMUSG00000027981/ENSMUSG00000022185/ENSMUSG00000037197/ENSMUSG00000064138/ENSMUSG00000030512/ENSMUSG00000001383/ENSMUSG00000024604/ENSMUSG00000021210/ENSMUSG00000010608/ENSMUSG00000022774/ENSMUSG00000060475/ENSMUSG00000062078/ENSMUSG00000001767/ENSMUSG00000048222/ENSMUSG00000005687/ENSMUSG00000027905/ENSMUSG00000056305/ENSMUSG00000022120/ENSMUSG00000038398/…	171
GO:0000377	RNA splicing, via transesterification reactions with bulged adenosine as nucleophile	171/7747	272/16212	0.628676	1.31562	5.02183	3.25831e-07	2.52438e-05	1.78607e-05	ENSMUSG00000027763/ENSMUSG00000035597/ENSMUSG00000027981/ENSMUSG00000022185/ENSMUSG00000037197/ENSMUSG00000064138/ENSMUSG00000030512/ENSMUSG00000001383/ENSMUSG00000024604/ENSMUSG00000021210/ENSMUSG00000010608/ENSMUSG00000022774/ENSMUSG00000060475/ENSMUSG00000062078/ENSMUSG00000001767/ENSMUSG00000048222/ENSMUSG00000005687/ENSMUSG00000027905/ENSMUSG00000056305/ENSMUSG00000022120/ENSMUSG00000038398/…	171
GO:0000398	mRNA splicing, via spliceosome	171/7747	272/16212	0.628676	1.31562	5.02183	3.25831e-07	2.52438e-05	1.78607e-05	ENSMUSG00000027763/ENSMUSG00000035597/ENSMUSG00000027981/ENSMUSG00000022185/ENSMUSG00000037197/ENSMUSG00000064138/ENSMUSG00000030512/ENSMUSG00000001383/ENSMUSG00000024604/ENSMUSG00000021210/ENSMUSG00000010608/ENSMUSG00000022774/ENSMUSG00000060475/ENSMUSG00000062078/ENSMUSG00000001767/ENSMUSG00000048222/ENSMUSG00000005687/ENSMUSG00000027905/ENSMUSG00000056305/ENSMUSG00000022120/ENSMUSG00000038398/…	171
GO:0031346	positive regulation of cell projection organization	250/7747	418/16212	0.598086	1.2516	4.98559	3.86922e-07	2.96067e-05	2.09476e-05	ENSMUSG00000026277/ENSMUSG00000027770/ENSMUSG00000022812/ENSMUSG00000020152/ENSMUSG00000000861/ENSMUSG00000020467/ENSMUSG00000044674/ENSMUSG00000032536/ENSMUSG00000021270/ENSMUSG00000021057/ENSMUSG00000049550/ENSMUSG00000026778/ENSMUSG00000019970/ENSMUSG00000070509/ENSMUSG00000029468/ENSMUSG00000024501/ENSMUSG00000030201/ENSMUSG00000042589/ENSMUSG00000052934/ENSMUSG00000001482/ENSMUSG00000031729/…	250
GO:0001503	ossification	237/7747	394/16212	0.601523	1.2588	4.97493	4.1001e-07	3.06402e-05	2.16788e-05	ENSMUSG00000022510/ENSMUSG00000047443/ENSMUSG00000027770/ENSMUSG00000051980/ENSMUSG00000022812/ENSMUSG00000044674/ENSMUSG00000040274/ENSMUSG00000006932/ENSMUSG00000031681/ENSMUSG00000023087/ENSMUSG00000001729/ENSMUSG00000021136/ENSMUSG00000021109/ENSMUSG00000027966/ENSMUSG00000027358/ENSMUSG00000005583/ENSMUSG00000020003/ENSMUSG00000019997/ENSMUSG00000032640/ENSMUSG00000029468/ENSMUSG00000033871/…	237
GO:0042594	response to starvation	144/7747	224/16212	0.642857	1.34529	4.97823	4.10316e-07	3.06402e-05	2.16788e-05	ENSMUSG00000026280/ENSMUSG00000029388/ENSMUSG00000035992/ENSMUSG00000037526/ENSMUSG00000059436/ENSMUSG00000071369/ENSMUSG00000024442/ENSMUSG00000024493/ENSMUSG00000030161/ENSMUSG00000001518/ENSMUSG00000022462/ENSMUSG00000040010/ENSMUSG00000031950/ENSMUSG00000031959/ENSMUSG00000042628/ENSMUSG00000028278/ENSMUSG00000027513/ENSMUSG00000026775/ENSMUSG00000027840/ENSMUSG00000040412/ENSMUSG00000031668/…	144
GO:0010506	regulation of autophagy	171/7747	273/16212	0.626374	1.3108	4.95439	4.62559e-07	3.38219e-05	2.393e-05	ENSMUSG00000026278/ENSMUSG00000047443/ENSMUSG00000022812/ENSMUSG00000020402/ENSMUSG00000001729/ENSMUSG00000037526/ENSMUSG00000021109/ENSMUSG00000021944/ENSMUSG00000001630/ENSMUSG00000019850/ENSMUSG00000050473/ENSMUSG00000028300/ENSMUSG00000028165/ENSMUSG00000024442/ENSMUSG00000024101/ENSMUSG00000045962/ENSMUSG00000004446/ENSMUSG00000031826/ENSMUSG00000040010/ENSMUSG00000028278/ENSMUSG00000028284/…	171
GO:0090263	positive regulation of canonical Wnt signaling pathway	70/7747	96/16212	0.729167	1.52591	4.94401	4.63837e-07	3.38219e-05	2.393e-05	ENSMUSG00000056342/ENSMUSG00000044548/ENSMUSG00000021096/ENSMUSG00000015133/ENSMUSG00000045962/ENSMUSG00000061048/ENSMUSG00000061130/ENSMUSG00000030309/ENSMUSG00000033952/ENSMUSG00000032702/ENSMUSG00000021464/ENSMUSG00000078202/ENSMUSG00000028017/ENSMUSG00000023972/ENSMUSG00000028871/ENSMUSG00000021754/ENSMUSG00000026872/ENSMUSG00000028476/ENSMUSG00000001506/ENSMUSG00000029755/ENSMUSG00000026411/…	70
GO:0060560	developmental growth involved in morphogenesis	167/7747	266/16212	0.62782	1.31383	4.93699	5.06344e-07	3.64921e-05	2.58192e-05	ENSMUSG00000022812/ENSMUSG00000000861/ENSMUSG00000020458/ENSMUSG00000006932/ENSMUSG00000031616/ENSMUSG00000051367/ENSMUSG00000028300/ENSMUSG00000028577/ENSMUSG00000025789/ENSMUSG00000070509/ENSMUSG00000036585/ENSMUSG00000024497/ENSMUSG00000024621/ENSMUSG00000008153/ENSMUSG00000030201/ENSMUSG00000031729/ENSMUSG00000004788/ENSMUSG00000029602/ENSMUSG00000027524/ENSMUSG00000028640/ENSMUSG00000022783/…	167
GO:0070646	protein modification by small protein removal	74/7747	103/16212	0.718447	1.50348	4.90371	5.81415e-07	4.14208e-05	2.93064e-05	ENSMUSG00000056342/ENSMUSG00000026767/ENSMUSG00000036990/ENSMUSG00000038250/ENSMUSG00000019850/ENSMUSG00000030127/ENSMUSG00000030107/ENSMUSG00000031826/ENSMUSG00000056305/ENSMUSG00000033075/ENSMUSG00000022111/ENSMUSG00000019373/ENSMUSG00000029592/ENSMUSG00000006906/ENSMUSG00000090115/ENSMUSG00000040550/ENSMUSG00000047879/ENSMUSG00000034252/ENSMUSG00000021203/ENSMUSG00000034235/ENSMUSG00000030965/…	74
GO:0110053	regulation of actin filament organization	159/7747	252/16212	0.630952	1.32038	4.90355	6.02049e-07	4.24034e-05	3.00017e-05	ENSMUSG00000033149/ENSMUSG00000020315/ENSMUSG00000074513/ENSMUSG00000020388/ENSMUSG00000021262/ENSMUSG00000000915/ENSMUSG00000021061/ENSMUSG00000026778/ENSMUSG00000019997/ENSMUSG00000039031/ENSMUSG00000028300/ENSMUSG00000030516/ENSMUSG00000038524/ENSMUSG00000029465/ENSMUSG00000043079/ENSMUSG00000024101/ENSMUSG00000031827/ENSMUSG00000021253/ENSMUSG00000040852/ENSMUSG00000002365/ENSMUSG00000024236/…	159
GO:0042176	regulation of protein catabolic process	206/7747	338/16212	0.609467	1.27542	4.8952	6.2133e-07	4.32697e-05	3.06146e-05	ENSMUSG00000026280/ENSMUSG00000022812/ENSMUSG00000038845/ENSMUSG00000051355/ENSMUSG00000020290/ENSMUSG00000001467/ENSMUSG00000028082/ENSMUSG00000038250/ENSMUSG00000001729/ENSMUSG00000021270/ENSMUSG00000044548/ENSMUSG00000019850/ENSMUSG00000070509/ENSMUSG00000024425/ENSMUSG00000057719/ENSMUSG00000024576/ENSMUSG00000003031/ENSMUSG00000025316/ENSMUSG00000003849/ENSMUSG00000031950/ENSMUSG00000019969/…	206
GO:0008380	RNA splicing	241/7747	403/16212	0.598015	1.25145	4.8901	6.32038e-07	4.35264e-05	3.07962e-05	ENSMUSG00000027763/ENSMUSG00000029404/ENSMUSG00000035597/ENSMUSG00000027981/ENSMUSG00000029427/ENSMUSG00000022185/ENSMUSG00000037197/ENSMUSG00000064138/ENSMUSG00000030512/ENSMUSG00000001383/ENSMUSG00000024498/ENSMUSG00000024604/ENSMUSG00000030204/ENSMUSG00000021210/ENSMUSG00000022462/ENSMUSG00000010608/ENSMUSG00000032423/ENSMUSG00000027510/ENSMUSG00000024146/ENSMUSG00000022774/ENSMUSG00000060475/…	241
GO:0030900	forebrain development	249/7747	418/16212	0.595694	1.2466	4.88639	6.42768e-07	4.37788e-05	3.09748e-05	ENSMUSG00000025958/ENSMUSG00000014602/ENSMUSG00000022812/ENSMUSG00000005917/ENSMUSG00000020283/ENSMUSG00000020458/ENSMUSG00000006932/ENSMUSG00000028078/ENSMUSG00000037161/ENSMUSG00000027737/ENSMUSG00000018395/ENSMUSG00000044894/ENSMUSG00000021294/ENSMUSG00000048251/ENSMUSG00000021109/ENSMUSG00000027358/ENSMUSG00000030265/ENSMUSG00000032846/ENSMUSG00000021587/ENSMUSG00000069171/ENSMUSG00000029475/…	249
GO:0044772	mitotic cell cycle phase transition	236/7747	394/16212	0.598985	1.25348	4.87283	6.90638e-07	4.6528e-05	3.29199e-05	ENSMUSG00000032409/ENSMUSG00000016984/ENSMUSG00000063275/ENSMUSG00000028926/ENSMUSG00000040274/ENSMUSG00000032555/ENSMUSG00000020380/ENSMUSG00000001729/ENSMUSG00000017843/ENSMUSG00000044548/ENSMUSG00000059970/ENSMUSG00000029414/ENSMUSG00000029438/ENSMUSG00000026778/ENSMUSG00000019982/ENSMUSG00000029472/ENSMUSG00000029466/ENSMUSG00000024617/ENSMUSG00000004266/ENSMUSG00000003031/ENSMUSG00000001517/…	236
GO:0001654	eye development	244/7747	409/16212	0.596577	1.24845	4.86834	7.0505e-07	4.69881e-05	3.32455e-05	ENSMUSG00000026273/ENSMUSG00000022656/ENSMUSG00000020160/ENSMUSG00000045671/ENSMUSG00000020467/ENSMUSG00000026728/ENSMUSG00000006932/ENSMUSG00000032556/ENSMUSG00000057777/ENSMUSG00000027737/ENSMUSG00000048251/ENSMUSG00000021136/ENSMUSG00000021109/ENSMUSG00000059436/ENSMUSG00000026317/ENSMUSG00000039910/ENSMUSG00000029475/ENSMUSG00000015134/ENSMUSG00000024620/ENSMUSG00000003031/ENSMUSG00000030201/…	244
GO:0098727	maintenance of cell number	128/7747	197/16212	0.649746	1.35971	4.8594	7.57638e-07	4.99557e-05	3.53451e-05	ENSMUSG00000022510/ENSMUSG00000002679/ENSMUSG00000048118/ENSMUSG00000029438/ENSMUSG00000041133/ENSMUSG00000030291/ENSMUSG00000029475/ENSMUSG00000030353/ENSMUSG00000008999/ENSMUSG00000028640/ENSMUSG00000026775/ENSMUSG00000018604/ENSMUSG00000040389/ENSMUSG00000031671/ENSMUSG00000026976/ENSMUSG00000053470/ENSMUSG00000055799/ENSMUSG00000039985/ENSMUSG00000020166/ENSMUSG00000066900/ENSMUSG00000049717/…	128
GO:0099173	postsynapse organization	174/7747	280/16212	0.621429	1.30045	4.85151	7.81692e-07	5.07615e-05	3.59152e-05	ENSMUSG00000022514/ENSMUSG00000014602/ENSMUSG00000027770/ENSMUSG00000022656/ENSMUSG00000020152/ENSMUSG00000020458/ENSMUSG00000049630/ENSMUSG00000027737/ENSMUSG00000001729/ENSMUSG00000044548/ENSMUSG00000000915/ENSMUSG00000047454/ENSMUSG00000001630/ENSMUSG00000040797/ENSMUSG00000042589/ENSMUSG00000029608/ENSMUSG00000019969/ENSMUSG00000042700/ENSMUSG00000024146/ENSMUSG00000052397/ENSMUSG00000025810/…	174
GO:0048588	developmental cell growth	163/7747	260/16212	0.626923	1.31195	4.8509	7.86239e-07	5.07615e-05	3.59152e-05	ENSMUSG00000022812/ENSMUSG00000020160/ENSMUSG00000000861/ENSMUSG00000020458/ENSMUSG00000006932/ENSMUSG00000031616/ENSMUSG00000021944/ENSMUSG00000028300/ENSMUSG00000028577/ENSMUSG00000066406/ENSMUSG00000025789/ENSMUSG00000070509/ENSMUSG00000024431/ENSMUSG00000024497/ENSMUSG00000024621/ENSMUSG00000008153/ENSMUSG00000031729/ENSMUSG00000004788/ENSMUSG00000029602/ENSMUSG00000027524/ENSMUSG00000022783/…	163
GO:0060562	epithelial tube morphogenesis	214/7747	354/16212	0.60452	1.26507	4.82382	8.88873e-07	5.67962e-05	4.01849e-05	ENSMUSG00000051980/ENSMUSG00000006932/ENSMUSG00000031616/ENSMUSG00000064325/ENSMUSG00000018395/ENSMUSG00000051367/ENSMUSG00000021109/ENSMUSG00000021048/ENSMUSG00000027358/ENSMUSG00000021944/ENSMUSG00000030265/ENSMUSG00000005583/ENSMUSG00000039910/ENSMUSG00000045680/ENSMUSG00000029475/ENSMUSG00000070509/ENSMUSG00000036585/ENSMUSG00000024431/ENSMUSG00000038593/ENSMUSG00000030201/ENSMUSG00000042812/…	214
GO:0090596	sensory organ morphogenesis	183/7747	297/16212	0.616162	1.28943	4.81589	9.32912e-07	5.90019e-05	4.17455e-05	ENSMUSG00000022656/ENSMUSG00000020160/ENSMUSG00000005917/ENSMUSG00000020467/ENSMUSG00000026768/ENSMUSG00000006932/ENSMUSG00000031616/ENSMUSG00000051367/ENSMUSG00000021109/ENSMUSG00000027966/ENSMUSG00000039910/ENSMUSG00000010461/ENSMUSG00000029475/ENSMUSG00000015134/ENSMUSG00000024497/ENSMUSG00000030201/ENSMUSG00000032419/ENSMUSG00000008999/ENSMUSG00000024238/ENSMUSG00000008730/ENSMUSG00000018604/…	183
GO:0051017	actin filament bundle assembly	109/7747	164/16212	0.664634	1.39087	4.81281	9.59959e-07	6.00993e-05	4.25219e-05	ENSMUSG00000033149/ENSMUSG00000050530/ENSMUSG00000041842/ENSMUSG00000020388/ENSMUSG00000021262/ENSMUSG00000026778/ENSMUSG00000019997/ENSMUSG00000030516/ENSMUSG00000024501/ENSMUSG00000043079/ENSMUSG00000010154/ENSMUSG00000021253/ENSMUSG00000052397/ENSMUSG00000022783/ENSMUSG00000025810/ENSMUSG00000002233/ENSMUSG00000022469/ENSMUSG00000055044/ENSMUSG00000029761/ENSMUSG00000062352/ENSMUSG00000015605/…	109
GO:0140238	presynaptic endocytosis	59/7747	79/16212	0.746835	1.56289	4.79774	9.69723e-07	6.01034e-05	4.25249e-05	ENSMUSG00000024456/ENSMUSG00000029465/ENSMUSG00000020961/ENSMUSG00000033419/ENSMUSG00000002365/ENSMUSG00000023805/ENSMUSG00000022789/ENSMUSG00000028488/ENSMUSG00000024480/ENSMUSG00000021816/ENSMUSG00000057230/ENSMUSG00000040722/ENSMUSG00000018566/ENSMUSG00000051790/ENSMUSG00000020894/ENSMUSG00000019370/ENSMUSG00000033628/ENSMUSG00000023064/ENSMUSG00000031302/ENSMUSG00000036273/ENSMUSG00000062202/…	59
GO:0016358	dendrite development	185/7747	301/16212	0.614618	1.2862	4.7947	1.03659e-06	6.36119e-05	4.50073e-05	ENSMUSG00000014602/ENSMUSG00000027770/ENSMUSG00000022812/ENSMUSG00000020152/ENSMUSG00000000861/ENSMUSG00000032536/ENSMUSG00000037161/ENSMUSG00000044548/ENSMUSG00000021057/ENSMUSG00000049550/ENSMUSG00000005583/ENSMUSG00000019970/ENSMUSG00000030557/ENSMUSG00000024431/ENSMUSG00000024617/ENSMUSG00000042589/ENSMUSG00000052934/ENSMUSG00000019969/ENSMUSG00000042700/ENSMUSG00000035274/ENSMUSG00000008999/…	185
GO:0048880	sensory system development	248/7747	418/16212	0.593301	1.24159	4.78719	1.05733e-06	6.42486e-05	4.54577e-05	ENSMUSG00000026273/ENSMUSG00000022656/ENSMUSG00000020160/ENSMUSG00000045671/ENSMUSG00000020467/ENSMUSG00000026728/ENSMUSG00000006932/ENSMUSG00000032556/ENSMUSG00000057777/ENSMUSG00000027737/ENSMUSG00000048251/ENSMUSG00000021136/ENSMUSG00000021109/ENSMUSG00000059436/ENSMUSG00000026317/ENSMUSG00000039910/ENSMUSG00000029475/ENSMUSG00000015134/ENSMUSG00000024620/ENSMUSG00000003031/ENSMUSG00000030201/…	248
GO:0110020	regulation of actomyosin structure organization	74/7747	104/16212	0.711538	1.48902	4.78612	1.0746e-06	6.42993e-05	4.54936e-05	ENSMUSG00000033149/ENSMUSG00000020388/ENSMUSG00000021262/ENSMUSG00000026778/ENSMUSG00000005583/ENSMUSG00000019997/ENSMUSG00000066406/ENSMUSG00000030516/ENSMUSG00000043079/ENSMUSG00000021253/ENSMUSG00000025810/ENSMUSG00000002233/ENSMUSG00000022469/ENSMUSG00000062352/ENSMUSG00000027274/ENSMUSG00000021013/ENSMUSG00000061762/ENSMUSG00000031355/ENSMUSG00000020580/ENSMUSG00000030043/ENSMUSG00000042099/…	74
GO:0007029	endoplasmic reticulum organization	65/7747	89/16212	0.730337	1.52836	4.78148	1.07892e-06	6.42993e-05	4.54936e-05	ENSMUSG00000020458/ENSMUSG00000021087/ENSMUSG00000004270/ENSMUSG00000005069/ENSMUSG00000045962/ENSMUSG00000061273/ENSMUSG00000031953/ENSMUSG00000054455/ENSMUSG00000073639/ENSMUSG00000038555/ENSMUSG00000031668/ENSMUSG00000052852/ENSMUSG00000019873/ENSMUSG00000028420/ENSMUSG00000018820/ENSMUSG00000041779/ENSMUSG00000078622/ENSMUSG00000022270/ENSMUSG00000043461/ENSMUSG00000029125/ENSMUSG00000021501/…	65
GO:0007626	locomotory behavior	163/7747	261/16212	0.624521	1.30692	4.78205	1.11101e-06	6.55813e-05	4.64006e-05	ENSMUSG00000022523/ENSMUSG00000020160/ENSMUSG00000020283/ENSMUSG00000040537/ENSMUSG00000026317/ENSMUSG00000074794/ENSMUSG00000015134/ENSMUSG00000000263/ENSMUSG00000006818/ENSMUSG00000038418/ENSMUSG00000027859/ENSMUSG00000040389/ENSMUSG00000055022/ENSMUSG00000022111/ENSMUSG00000042372/ENSMUSG00000024897/ENSMUSG00000059363/ENSMUSG00000026024/ENSMUSG00000017412/ENSMUSG00000027577/ENSMUSG00000027584/…	163
GO:0032386	regulation of intracellular transport	169/7747	272/16212	0.621324	1.30023	4.777	1.13739e-06	6.65053e-05	4.70544e-05	ENSMUSG00000022812/ENSMUSG00000051355/ENSMUSG00000020290/ENSMUSG00000032560/ENSMUSG00000074513/ENSMUSG00000018395/ENSMUSG00000018398/ENSMUSG00000021270/ENSMUSG00000018707/ENSMUSG00000021096/ENSMUSG00000034435/ENSMUSG00000021057/ENSMUSG00000027356/ENSMUSG00000026778/ENSMUSG00000050473/ENSMUSG00000024454/ENSMUSG00000024487/ENSMUSG00000024604/ENSMUSG00000004455/ENSMUSG00000042992/ENSMUSG00000045962/…	169
GO:0006261	DNA-templated DNA replication	95/7747	140/16212	0.678571	1.42003	4.77498	1.15916e-06	6.71444e-05	4.75066e-05	ENSMUSG00000032409/ENSMUSG00000068428/ENSMUSG00000026309/ENSMUSG00000034206/ENSMUSG00000016984/ENSMUSG00000032555/ENSMUSG00000020380/ENSMUSG00000055884/ENSMUSG00000043991/ENSMUSG00000035842/ENSMUSG00000006585/ENSMUSG00000033596/ENSMUSG00000040044/ENSMUSG00000027502/ENSMUSG00000022673/ENSMUSG00000031669/ENSMUSG00000037855/ENSMUSG00000029363/ENSMUSG00000024999/ENSMUSG00000041859/ENSMUSG00000041147/…	95
GO:0150063	visual system development	244/7747	411/16212	0.593674	1.24237	4.7612	1.20386e-06	6.90879e-05	4.88817e-05	ENSMUSG00000026273/ENSMUSG00000022656/ENSMUSG00000020160/ENSMUSG00000045671/ENSMUSG00000020467/ENSMUSG00000026728/ENSMUSG00000006932/ENSMUSG00000032556/ENSMUSG00000057777/ENSMUSG00000027737/ENSMUSG00000048251/ENSMUSG00000021136/ENSMUSG00000021109/ENSMUSG00000059436/ENSMUSG00000026317/ENSMUSG00000039910/ENSMUSG00000029475/ENSMUSG00000015134/ENSMUSG00000024620/ENSMUSG00000003031/ENSMUSG00000030201/…	244
GO:0030038	contractile actin filament bundle assembly	78/7747	111/16212	0.702703	1.47053	4.75864	1.24414e-06	7.01018e-05	4.9599e-05	ENSMUSG00000033149/ENSMUSG00000050530/ENSMUSG00000041842/ENSMUSG00000020388/ENSMUSG00000021262/ENSMUSG00000026778/ENSMUSG00000019997/ENSMUSG00000030516/ENSMUSG00000043079/ENSMUSG00000021253/ENSMUSG00000022783/ENSMUSG00000025810/ENSMUSG00000002233/ENSMUSG00000022469/ENSMUSG00000055044/ENSMUSG00000062352/ENSMUSG00000015605/ENSMUSG00000027274/ENSMUSG00000026872/ENSMUSG00000021013/ENSMUSG00000061762/…	78
GO:0043149	stress fiber assembly	78/7747	111/16212	0.702703	1.47053	4.75864	1.24414e-06	7.01018e-05	4.9599e-05	ENSMUSG00000033149/ENSMUSG00000050530/ENSMUSG00000041842/ENSMUSG00000020388/ENSMUSG00000021262/ENSMUSG00000026778/ENSMUSG00000019997/ENSMUSG00000030516/ENSMUSG00000043079/ENSMUSG00000021253/ENSMUSG00000022783/ENSMUSG00000025810/ENSMUSG00000002233/ENSMUSG00000022469/ENSMUSG00000055044/ENSMUSG00000062352/ENSMUSG00000015605/ENSMUSG00000027274/ENSMUSG00000026872/ENSMUSG00000021013/ENSMUSG00000061762/…	78
GO:1902903	regulation of supramolecular fiber organization	216/7747	359/16212	0.601671	1.25911	4.74928	1.28689e-06	7.18573e-05	5.08411e-05	ENSMUSG00000033149/ENSMUSG00000020315/ENSMUSG00000074513/ENSMUSG00000020388/ENSMUSG00000021262/ENSMUSG00000000915/ENSMUSG00000021061/ENSMUSG00000049550/ENSMUSG00000026778/ENSMUSG00000005583/ENSMUSG00000019970/ENSMUSG00000019997/ENSMUSG00000039031/ENSMUSG00000028300/ENSMUSG00000066406/ENSMUSG00000030516/ENSMUSG00000024346/ENSMUSG00000038524/ENSMUSG00000029465/ENSMUSG00000043079/ENSMUSG00000003031/…	216
GO:0016311	dephosphorylation	130/7747	202/16212	0.643564	1.34677	4.74445	1.35105e-06	7.47659e-05	5.2899e-05	ENSMUSG00000026309/ENSMUSG00000020463/ENSMUSG00000032561/ENSMUSG00000017843/ENSMUSG00000021096/ENSMUSG00000021051/ENSMUSG00000021054/ENSMUSG00000052221/ENSMUSG00000027358/ENSMUSG00000005583/ENSMUSG00000033871/ENSMUSG00000038582/ENSMUSG00000004455/ENSMUSG00000004266/ENSMUSG00000030203/ENSMUSG00000043733/ENSMUSG00000028274/ENSMUSG00000061130/ENSMUSG00000023805/ENSMUSG00000002228/ENSMUSG00000062127/…	130
GO:0043549	regulation of kinase activity	266/7747	453/16212	0.587196	1.22881	4.72528	1.42826e-06	7.83392e-05	5.54273e-05	ENSMUSG00000036894/ENSMUSG00000016984/ENSMUSG00000031714/ENSMUSG00000020380/ENSMUSG00000001729/ENSMUSG00000021270/ENSMUSG00000079055/ENSMUSG00000027358/ENSMUSG00000019850/ENSMUSG00000071369/ENSMUSG00000029468/ENSMUSG00000024427/ENSMUSG00000036585/ENSMUSG00000024621/ENSMUSG00000024620/ENSMUSG00000049107/ENSMUSG00000004266/ENSMUSG00000046733/ENSMUSG00000003031/ENSMUSG00000030201/ENSMUSG00000029616/…	266
GO:0061572	actin filament bundle organization	110/7747	167/16212	0.658683	1.37841	4.70232	1.67043e-06	9.08187e-05	6.42568e-05	ENSMUSG00000033149/ENSMUSG00000050530/ENSMUSG00000041842/ENSMUSG00000020388/ENSMUSG00000021262/ENSMUSG00000026778/ENSMUSG00000019997/ENSMUSG00000030516/ENSMUSG00000024501/ENSMUSG00000043079/ENSMUSG00000010154/ENSMUSG00000021253/ENSMUSG00000052397/ENSMUSG00000022783/ENSMUSG00000025810/ENSMUSG00000002233/ENSMUSG00000022469/ENSMUSG00000055044/ENSMUSG00000029761/ENSMUSG00000062352/ENSMUSG00000015605/…	110
GO:1904375	regulation of protein localization to cell periphery	102/7747	153/16212	0.666667	1.39512	4.69758	1.71058e-06	9.21931e-05	6.52292e-05	ENSMUSG00000022812/ENSMUSG00000051355/ENSMUSG00000020315/ENSMUSG00000045658/ENSMUSG00000001729/ENSMUSG00000021057/ENSMUSG00000019998/ENSMUSG00000019978/ENSMUSG00000024617/ENSMUSG00000045962/ENSMUSG00000031823/ENSMUSG00000024247/ENSMUSG00000024143/ENSMUSG00000052397/ENSMUSG00000006740/ENSMUSG00000027883/ENSMUSG00000027799/ENSMUSG00000026944/ENSMUSG00000035247/ENSMUSG00000052504/ENSMUSG00000038976/…	102
GO:0003007	heart morphogenesis	165/7747	266/16212	0.620301	1.29809	4.68946	1.75403e-06	9.37198e-05	6.63095e-05	ENSMUSG00000020458/ENSMUSG00000044674/ENSMUSG00000006932/ENSMUSG00000031616/ENSMUSG00000018395/ENSMUSG00000051367/ENSMUSG00000021109/ENSMUSG00000027966/ENSMUSG00000027358/ENSMUSG00000021944/ENSMUSG00000030247/ENSMUSG00000030249/ENSMUSG00000005583/ENSMUSG00000039910/ENSMUSG00000030201/ENSMUSG00000042812/ENSMUSG00000019969/ENSMUSG00000008999/ENSMUSG00000025810/ENSMUSG00000018604/ENSMUSG00000022483/…	165
GO:0022604	regulation of cell morphogenesis	160/7747	257/16212	0.622568	1.30284	4.68149	1.82669e-06	9.67676e-05	6.84659e-05	ENSMUSG00000027765/ENSMUSG00000027770/ENSMUSG00000020152/ENSMUSG00000000861/ENSMUSG00000050530/ENSMUSG00000028082/ENSMUSG00000018395/ENSMUSG00000021057/ENSMUSG00000019970/ENSMUSG00000019978/ENSMUSG00000039031/ENSMUSG00000028577/ENSMUSG00000024456/ENSMUSG00000024621/ENSMUSG00000042589/ENSMUSG00000052934/ENSMUSG00000029602/ENSMUSG00000024143/ENSMUSG00000052397/ENSMUSG00000002227/ENSMUSG00000014601/…	160
GO:0000209	protein polyubiquitination	144/7747	228/16212	0.631579	1.32169	4.67977	1.85171e-06	9.72619e-05	6.88156e-05	ENSMUSG00000049502/ENSMUSG00000006932/ENSMUSG00000027993/ENSMUSG00000021846/ENSMUSG00000021694/ENSMUSG00000019850/ENSMUSG00000028577/ENSMUSG00000029474/ENSMUSG00000020794/ENSMUSG00000029472/ENSMUSG00000091896/ENSMUSG00000060450/ENSMUSG00000029466/ENSMUSG00000001472/ENSMUSG00000003849/ENSMUSG00000031930/ENSMUSG00000028277/ENSMUSG00000022674/ENSMUSG00000024370/ENSMUSG00000014470/ENSMUSG00000002222/…	144
GO:0046777	protein autophosphorylation	120/7747	185/16212	0.648649	1.35741	4.67725	1.88729e-06	9.82975e-05	6.95483e-05	ENSMUSG00000032409/ENSMUSG00000026277/ENSMUSG00000036894/ENSMUSG00000022812/ENSMUSG00000064090/ENSMUSG00000020380/ENSMUSG00000007411/ENSMUSG00000029471/ENSMUSG00000024621/ENSMUSG00000024620/ENSMUSG00000024617/ENSMUSG00000038379/ENSMUSG00000027859/ENSMUSG00000031668/ENSMUSG00000061288/ENSMUSG00000031450/ENSMUSG00000021457/ENSMUSG00000027579/ENSMUSG00000029833/ENSMUSG00000026034/ENSMUSG00000020715/…	120
GO:0043010	camera-type eye development	219/7747	366/16212	0.598361	1.25218	4.66816	1.91201e-06	9.87553e-05	6.98722e-05	ENSMUSG00000026273/ENSMUSG00000022656/ENSMUSG00000020160/ENSMUSG00000045671/ENSMUSG00000020467/ENSMUSG00000026728/ENSMUSG00000006932/ENSMUSG00000032556/ENSMUSG00000057777/ENSMUSG00000027737/ENSMUSG00000048251/ENSMUSG00000021109/ENSMUSG00000059436/ENSMUSG00000026317/ENSMUSG00000039910/ENSMUSG00000029475/ENSMUSG00000015134/ENSMUSG00000024620/ENSMUSG00000003031/ENSMUSG00000030201/ENSMUSG00000019969/…	219
GO:0050767	regulation of neurogenesis	251/7747	426/16212	0.589202	1.23301	4.66235	1.94834e-06	9.97835e-05	7.05997e-05	ENSMUSG00000026277/ENSMUSG00000027770/ENSMUSG00000022812/ENSMUSG00000020152/ENSMUSG00000000861/ENSMUSG00000020458/ENSMUSG00000026728/ENSMUSG00000032536/ENSMUSG00000006932/ENSMUSG00000021109/ENSMUSG00000021057/ENSMUSG00000027358/ENSMUSG00000030265/ENSMUSG00000019982/ENSMUSG00000019970/ENSMUSG00000070509/ENSMUSG00000024621/ENSMUSG00000049107/ENSMUSG00000004455/ENSMUSG00000042589/ENSMUSG00000052934/…	251
GO:0072594	establishment of protein localization to organelle	235/7747	396/16212	0.593434	1.24187	4.66162	1.96412e-06	9.97835e-05	7.05997e-05	ENSMUSG00000026273/ENSMUSG00000022905/ENSMUSG00000020128/ENSMUSG00000007739/ENSMUSG00000020283/ENSMUSG00000026718/ENSMUSG00000005907/ENSMUSG00000037161/ENSMUSG00000020361/ENSMUSG00000001729/ENSMUSG00000021270/ENSMUSG00000066278/ENSMUSG00000037526/ENSMUSG00000021057/ENSMUSG00000027356/ENSMUSG00000026778/ENSMUSG00000019850/ENSMUSG00000020003/ENSMUSG00000006850/ENSMUSG00000024454/ENSMUSG00000024500/…	235
GO:0016579	protein deubiquitination	62/7747	85/16212	0.729412	1.52643	4.65509	2.04746e-06	0.000102835	7.2759e-05	ENSMUSG00000056342/ENSMUSG00000026767/ENSMUSG00000036990/ENSMUSG00000038250/ENSMUSG00000019850/ENSMUSG00000030107/ENSMUSG00000031826/ENSMUSG00000056305/ENSMUSG00000022111/ENSMUSG00000029592/ENSMUSG00000006906/ENSMUSG00000090115/ENSMUSG00000040550/ENSMUSG00000047879/ENSMUSG00000021203/ENSMUSG00000034235/ENSMUSG00000030965/ENSMUSG00000020020/ENSMUSG00000040455/ENSMUSG00000020905/ENSMUSG00000005501/…	62
GO:1903312	negative regulation of mRNA metabolic process	68/7747	95/16212	0.715789	1.49792	4.65625	2.06037e-06	0.000102835	7.2759e-05	ENSMUSG00000023087/ENSMUSG00000022185/ENSMUSG00000044595/ENSMUSG00000021210/ENSMUSG00000032265/ENSMUSG00000032423/ENSMUSG00000027510/ENSMUSG00000062078/ENSMUSG00000068823/ENSMUSG00000022283/ENSMUSG00000038398/ENSMUSG00000029538/ENSMUSG00000026942/ENSMUSG00000023951/ENSMUSG00000043962/ENSMUSG00000028639/ENSMUSG00000021179/ENSMUSG00000037331/ENSMUSG00000026413/ENSMUSG00000037573/ENSMUSG00000000142/…	68
GO:0061014	positive regulation of mRNA catabolic process	65/7747	90/16212	0.722222	1.51138	4.65387	2.07396e-06	0.000102835	7.2759e-05	ENSMUSG00000027770/ENSMUSG00000020464/ENSMUSG00000023087/ENSMUSG00000044595/ENSMUSG00000041477/ENSMUSG00000032423/ENSMUSG00000062078/ENSMUSG00000068823/ENSMUSG00000002227/ENSMUSG00000022283/ENSMUSG00000020166/ENSMUSG00000029423/ENSMUSG00000042650/ENSMUSG00000006288/ENSMUSG00000024472/ENSMUSG00000038848/ENSMUSG00000028842/ENSMUSG00000005506/ENSMUSG00000028580/ENSMUSG00000028639/ENSMUSG00000020515/…	65
GO:0001824	blastocyst development	96/7747	143/16212	0.671329	1.40488	4.65216	2.1405e-06	0.000105292	7.44971e-05	ENSMUSG00000020458/ENSMUSG00000003418/ENSMUSG00000061882/ENSMUSG00000030291/ENSMUSG00000039910/ENSMUSG00000030516/ENSMUSG00000024486/ENSMUSG00000004455/ENSMUSG00000004268/ENSMUSG00000030353/ENSMUSG00000028640/ENSMUSG00000020166/ENSMUSG00000066900/ENSMUSG00000003032/ENSMUSG00000000301/ENSMUSG00000029655/ENSMUSG00000041147/ENSMUSG00000027581/ENSMUSG00000015605/ENSMUSG00000063888/ENSMUSG00000023980/…	96
GO:1902373	negative regulation of mRNA catabolic process	54/7747	72/16212	0.75	1.56951	4.63313	2.23061e-06	0.000108861	7.7022e-05	ENSMUSG00000023087/ENSMUSG00000044595/ENSMUSG00000032265/ENSMUSG00000032423/ENSMUSG00000027510/ENSMUSG00000062078/ENSMUSG00000068823/ENSMUSG00000022283/ENSMUSG00000038398/ENSMUSG00000026942/ENSMUSG00000023951/ENSMUSG00000043962/ENSMUSG00000028639/ENSMUSG00000021179/ENSMUSG00000037331/ENSMUSG00000026413/ENSMUSG00000037573/ENSMUSG00000000142/ENSMUSG00000018554/ENSMUSG00000044468/ENSMUSG00000025451/…	54
GO:0031032	actomyosin structure organization	132/7747	207/16212	0.637681	1.33446	4.63302	2.33441e-06	0.000113036	7.99765e-05	ENSMUSG00000033149/ENSMUSG00000050530/ENSMUSG00000041842/ENSMUSG00000020388/ENSMUSG00000021279/ENSMUSG00000021262/ENSMUSG00000026778/ENSMUSG00000005583/ENSMUSG00000019997/ENSMUSG00000019978/ENSMUSG00000066406/ENSMUSG00000030557/ENSMUSG00000030516/ENSMUSG00000024620/ENSMUSG00000043079/ENSMUSG00000021253/ENSMUSG00000022783/ENSMUSG00000025810/ENSMUSG00000002233/ENSMUSG00000022469/ENSMUSG00000002812/…	132
GO:0044843	cell cycle G1/S phase transition	143/7747	227/16212	0.629956	1.3183	4.62006	2.47634e-06	0.00011898	8.41815e-05	ENSMUSG00000022510/ENSMUSG00000063275/ENSMUSG00000040274/ENSMUSG00000001729/ENSMUSG00000017843/ENSMUSG00000044548/ENSMUSG00000029438/ENSMUSG00000019982/ENSMUSG00000024621/ENSMUSG00000024617/ENSMUSG00000004266/ENSMUSG00000003031/ENSMUSG00000004446/ENSMUSG00000052934/ENSMUSG00000033596/ENSMUSG00000027510/ENSMUSG00000024283/ENSMUSG00000027552/ENSMUSG00000057329/ENSMUSG00000038482/ENSMUSG00000049285/…	143
GO:0051492	regulation of stress fiber assembly	66/7747	92/16212	0.717391	1.50127	4.61256	2.55564e-06	0.000121845	8.62089e-05	ENSMUSG00000033149/ENSMUSG00000020388/ENSMUSG00000021262/ENSMUSG00000026778/ENSMUSG00000019997/ENSMUSG00000030516/ENSMUSG00000043079/ENSMUSG00000021253/ENSMUSG00000025810/ENSMUSG00000002233/ENSMUSG00000022469/ENSMUSG00000062352/ENSMUSG00000027274/ENSMUSG00000021013/ENSMUSG00000061762/ENSMUSG00000031355/ENSMUSG00000020580/ENSMUSG00000030043/ENSMUSG00000042099/ENSMUSG00000052921/ENSMUSG00000055447/…	66
GO:0048863	stem cell differentiation	155/7747	249/16212	0.62249	1.30267	4.60441	2.65862e-06	0.000125787	8.89981e-05	ENSMUSG00000022510/ENSMUSG00000027770/ENSMUSG00000022812/ENSMUSG00000044674/ENSMUSG00000040274/ENSMUSG00000006932/ENSMUSG00000031616/ENSMUSG00000021258/ENSMUSG00000051367/ENSMUSG00000021109/ENSMUSG00000064138/ENSMUSG00000005583/ENSMUSG00000039910/ENSMUSG00000078671/ENSMUSG00000063870/ENSMUSG00000030201/ENSMUSG00000042594/ENSMUSG00000032419/ENSMUSG00000027524/ENSMUSG00000008999/ENSMUSG00000028640/…	155
GO:0009101	glycoprotein biosynthetic process	167/7747	271/16212	0.616236	1.28959	4.59899	2.71668e-06	0.00012756	9.02527e-05	ENSMUSG00000073608/ENSMUSG00000034064/ENSMUSG00000022793/ENSMUSG00000051650/ENSMUSG00000003418/ENSMUSG00000006932/ENSMUSG00000031712/ENSMUSG00000029431/ENSMUSG00000030283/ENSMUSG00000025789/ENSMUSG00000032640/ENSMUSG00000024486/ENSMUSG00000054008/ENSMUSG00000041372/ENSMUSG00000097084/ENSMUSG00000019969/ENSMUSG00000056131/ENSMUSG00000028277/ENSMUSG00000031749/ENSMUSG00000056091/ENSMUSG00000057329/…	167
GO:1901990	regulation of mitotic cell cycle phase transition	186/7747	306/16212	0.607843	1.27202	4.5956	2.74213e-06	0.000127787	9.04132e-05	ENSMUSG00000032409/ENSMUSG00000016984/ENSMUSG00000063275/ENSMUSG00000040274/ENSMUSG00000032555/ENSMUSG00000020380/ENSMUSG00000001729/ENSMUSG00000017843/ENSMUSG00000044548/ENSMUSG00000059970/ENSMUSG00000029414/ENSMUSG00000029438/ENSMUSG00000026778/ENSMUSG00000029472/ENSMUSG00000029466/ENSMUSG00000004266/ENSMUSG00000003031/ENSMUSG00000004446/ENSMUSG00000052934/ENSMUSG00000033596/ENSMUSG00000038379/…	186
GO:0018209	peptidyl-serine modification	125/7747	195/16212	0.641026	1.34146	4.5891	2.89307e-06	0.000133815	9.46782e-05	ENSMUSG00000032409/ENSMUSG00000022812/ENSMUSG00000034064/ENSMUSG00000028078/ENSMUSG00000035992/ENSMUSG00000001729/ENSMUSG00000007411/ENSMUSG00000024576/ENSMUSG00000024617/ENSMUSG00000049107/ENSMUSG00000032652/ENSMUSG00000045962/ENSMUSG00000038379/ENSMUSG00000027513/ENSMUSG00000031668/ENSMUSG00000057329/ENSMUSG00000029361/ENSMUSG00000022114/ENSMUSG00000021457/ENSMUSG00000054051/ENSMUSG00000061436/…	125
GO:0048488	synaptic vesicle endocytosis	55/7747	74/16212	0.743243	1.55537	4.58071	2.9201e-06	0.000134065	9.48549e-05	ENSMUSG00000024456/ENSMUSG00000029465/ENSMUSG00000020961/ENSMUSG00000033419/ENSMUSG00000002365/ENSMUSG00000023805/ENSMUSG00000022789/ENSMUSG00000028488/ENSMUSG00000024480/ENSMUSG00000021816/ENSMUSG00000040722/ENSMUSG00000018566/ENSMUSG00000051790/ENSMUSG00000020894/ENSMUSG00000033628/ENSMUSG00000023064/ENSMUSG00000031302/ENSMUSG00000036273/ENSMUSG00000062202/ENSMUSG00000022841/ENSMUSG00000007207/…	55
GO:0050770	regulation of axonogenesis	108/7747	165/16212	0.654545	1.36975	4.56685	3.23675e-06	0.00014751	0.000104368	ENSMUSG00000026277/ENSMUSG00000022812/ENSMUSG00000000861/ENSMUSG00000020458/ENSMUSG00000026728/ENSMUSG00000032536/ENSMUSG00000070509/ENSMUSG00000031729/ENSMUSG00000004788/ENSMUSG00000019969/ENSMUSG00000042700/ENSMUSG00000033419/ENSMUSG00000025810/ENSMUSG00000027859/ENSMUSG00000050947/ENSMUSG00000020476/ENSMUSG00000067336/ENSMUSG00000059363/ENSMUSG00000025020/ENSMUSG00000018820/ENSMUSG00000036580/…	108
GO:1903313	positive regulation of mRNA metabolic process	88/7747	130/16212	0.676923	1.41658	4.56208	3.3212e-06	0.000150254	0.000106309	ENSMUSG00000027770/ENSMUSG00000020464/ENSMUSG00000023087/ENSMUSG00000044595/ENSMUSG00000041477/ENSMUSG00000032423/ENSMUSG00000062078/ENSMUSG00000068823/ENSMUSG00000002227/ENSMUSG00000022283/ENSMUSG00000020166/ENSMUSG00000022120/ENSMUSG00000038398/ENSMUSG00000029423/ENSMUSG00000042650/ENSMUSG00000006288/ENSMUSG00000024472/ENSMUSG00000038848/ENSMUSG00000043962/ENSMUSG00000028842/ENSMUSG00000005506/…	88
GO:1905475	regulation of protein localization to membrane	132/7747	208/16212	0.634615	1.32805	4.55525	3.3939e-06	0.00015243	0.000107849	ENSMUSG00000022812/ENSMUSG00000051355/ENSMUSG00000020315/ENSMUSG00000045658/ENSMUSG00000027737/ENSMUSG00000001729/ENSMUSG00000021057/ENSMUSG00000019998/ENSMUSG00000024617/ENSMUSG00000045962/ENSMUSG00000031823/ENSMUSG00000024247/ENSMUSG00000024143/ENSMUSG00000024146/ENSMUSG00000052397/ENSMUSG00000006740/ENSMUSG00000069601/ENSMUSG00000018599/ENSMUSG00000027799/ENSMUSG00000029838/ENSMUSG00000042121/…	132
GO:0007005	mitochondrion organization	246/7747	419/16212	0.587112	1.22864	4.5361	3.56656e-06	0.000159033	0.00011252	ENSMUSG00000026278/ENSMUSG00000022812/ENSMUSG00000038845/ENSMUSG00000020128/ENSMUSG00000020464/ENSMUSG00000045658/ENSMUSG00000032532/ENSMUSG00000032536/ENSMUSG00000031616/ENSMUSG00000037161/ENSMUSG00000020361/ENSMUSG00000001729/ENSMUSG00000064326/ENSMUSG00000037679/ENSMUSG00000021270/ENSMUSG00000091803/ENSMUSG00000000915/ENSMUSG00000026317/ENSMUSG00000030249/ENSMUSG00000019992/ENSMUSG00000030557/…	246
GO:0051648	vesicle localization	128/7747	201/16212	0.636816	1.33265	4.53981	3.65867e-06	0.000161975	0.000114602	ENSMUSG00000014602/ENSMUSG00000020149/ENSMUSG00000026718/ENSMUSG00000032536/ENSMUSG00000006932/ENSMUSG00000029434/ENSMUSG00000029468/ENSMUSG00000042992/ENSMUSG00000061048/ENSMUSG00000021248/ENSMUSG00000019969/ENSMUSG00000033419/ENSMUSG00000006740/ENSMUSG00000009907/ENSMUSG00000024480/ENSMUSG00000041609/ENSMUSG00000057948/ENSMUSG00000020792/ENSMUSG00000053580/ENSMUSG00000028779/ENSMUSG00000027273/…	128
GO:0048255	mRNA stabilization	48/7747	63/16212	0.761905	1.59442	4.52222	3.80654e-06	0.000167326	0.000118388	ENSMUSG00000023087/ENSMUSG00000044595/ENSMUSG00000032265/ENSMUSG00000032423/ENSMUSG00000027510/ENSMUSG00000062078/ENSMUSG00000068823/ENSMUSG00000022283/ENSMUSG00000026942/ENSMUSG00000023951/ENSMUSG00000043962/ENSMUSG00000028639/ENSMUSG00000021179/ENSMUSG00000037331/ENSMUSG00000000142/ENSMUSG00000018554/ENSMUSG00000044468/ENSMUSG00000025451/ENSMUSG00000022144/ENSMUSG00000033581/ENSMUSG00000010554/…	48
GO:1902369	negative regulation of RNA catabolic process	59/7747	81/16212	0.728395	1.5243	4.52531	3.8871e-06	0.000169664	0.000120042	ENSMUSG00000027770/ENSMUSG00000023087/ENSMUSG00000044595/ENSMUSG00000032265/ENSMUSG00000032423/ENSMUSG00000027510/ENSMUSG00000062078/ENSMUSG00000068823/ENSMUSG00000022283/ENSMUSG00000038398/ENSMUSG00000026942/ENSMUSG00000023951/ENSMUSG00000043962/ENSMUSG00000028639/ENSMUSG00000021179/ENSMUSG00000037331/ENSMUSG00000026413/ENSMUSG00000037573/ENSMUSG00000008301/ENSMUSG00000000142/ENSMUSG00000031403/…	59
GO:0099175	regulation of postsynapse organization	110/7747	169/16212	0.650888	1.3621	4.52676	3.91909e-06	0.000169864	0.000120183	ENSMUSG00000022514/ENSMUSG00000014602/ENSMUSG00000027770/ENSMUSG00000022656/ENSMUSG00000020152/ENSMUSG00000020458/ENSMUSG00000001729/ENSMUSG00000044548/ENSMUSG00000042589/ENSMUSG00000019969/ENSMUSG00000042700/ENSMUSG00000024146/ENSMUSG00000026782/ENSMUSG00000020476/ENSMUSG00000030309/ENSMUSG00000022789/ENSMUSG00000021464/ENSMUSG00000047368/ENSMUSG00000063506/ENSMUSG00000026959/ENSMUSG00000053580/…	110
GO:0022613	ribonucleoprotein complex biogenesis	233/7747	395/16212	0.589873	1.23442	4.51215	4.00785e-06	0.000171468	0.000121318	ENSMUSG00000032409/ENSMUSG00000026273/ENSMUSG00000027763/ENSMUSG00000020116/ENSMUSG00000000581/ENSMUSG00000020290/ENSMUSG00000049950/ENSMUSG00000040464/ENSMUSG00000025962/ENSMUSG00000028081/ENSMUSG00000021282/ENSMUSG00000021270/ENSMUSG00000035597/ENSMUSG00000023106/ENSMUSG00000024608/ENSMUSG00000004268/ENSMUSG00000030204/ENSMUSG00000041438/ENSMUSG00000003848/ENSMUSG00000109941/ENSMUSG00000021243/…	233
GO:0003279	cardiac septum development	82/7747	120/16212	0.683333	1.43	4.52284	4.01143e-06	0.000171468	0.000121318	ENSMUSG00000044674/ENSMUSG00000021944/ENSMUSG00000030247/ENSMUSG00000039910/ENSMUSG00000054008/ENSMUSG00000030201/ENSMUSG00000008999/ENSMUSG00000025810/ENSMUSG00000018604/ENSMUSG00000026976/ENSMUSG00000067336/ENSMUSG00000020644/ENSMUSG00000001870/ENSMUSG00000028023/ENSMUSG00000023972/ENSMUSG00000027276/ENSMUSG00000032744/ENSMUSG00000035247/ENSMUSG00000040289/ENSMUSG00000005836/ENSMUSG00000042258/…	82
GO:0071786	endoplasmic reticulum tubular network organization	20/7747	21/16212	0.952381	1.99303	4.35605	4.35909e-06	0.000185052	0.00013093	ENSMUSG00000020458/ENSMUSG00000021087/ENSMUSG00000031953/ENSMUSG00000073639/ENSMUSG00000038555/ENSMUSG00000052852/ENSMUSG00000019873/ENSMUSG00000018820/ENSMUSG00000017802/ENSMUSG00000039318/ENSMUSG00000021066/ENSMUSG00000037720/ENSMUSG00000022099/ENSMUSG00000033589/ENSMUSG00000059811/ENSMUSG00000009207/ENSMUSG00000002395/ENSMUSG00000024759/ENSMUSG00000024758/ENSMUSG00000036104	20
GO:0003012	muscle system process	237/7747	403/16212	0.588089	1.23068	4.48616	4.52051e-06	0.000190348	0.000134677	ENSMUSG00000027765/ENSMUSG00000022812/ENSMUSG00000020160/ENSMUSG00000020128/ENSMUSG00000003161/ENSMUSG00000031616/ENSMUSG00000031681/ENSMUSG00000021270/ENSMUSG00000079055/ENSMUSG00000027358/ENSMUSG00000021944/ENSMUSG00000030247/ENSMUSG00000030249/ENSMUSG00000005583/ENSMUSG00000019997/ENSMUSG00000066406/ENSMUSG00000030554/ENSMUSG00000030557/ENSMUSG00000028172/ENSMUSG00000029470/ENSMUSG00000029467/…	237
GO:0009100	glycoprotein metabolic process	198/7747	330/16212	0.6	1.25561	4.48785	4.54525e-06	0.000190348	0.000134677	ENSMUSG00000073608/ENSMUSG00000034064/ENSMUSG00000022793/ENSMUSG00000020149/ENSMUSG00000051650/ENSMUSG00000003418/ENSMUSG00000006932/ENSMUSG00000031712/ENSMUSG00000021109/ENSMUSG00000027966/ENSMUSG00000027358/ENSMUSG00000029431/ENSMUSG00000030283/ENSMUSG00000025789/ENSMUSG00000032640/ENSMUSG00000030513/ENSMUSG00000024486/ENSMUSG00000054008/ENSMUSG00000041372/ENSMUSG00000097084/ENSMUSG00000015027/…	198
GO:0090150	establishment of protein localization to membrane	153/7747	247/16212	0.619433	1.29628	4.48868	4.60985e-06	0.000191757	0.000135674	ENSMUSG00000036304/ENSMUSG00000022656/ENSMUSG00000051355/ENSMUSG00000020315/ENSMUSG00000025786/ENSMUSG00000029392/ENSMUSG00000029401/ENSMUSG00000020361/ENSMUSG00000021270/ENSMUSG00000066278/ENSMUSG00000021057/ENSMUSG00000049550/ENSMUSG00000024617/ENSMUSG00000005069/ENSMUSG00000024101/ENSMUSG00000045962/ENSMUSG00000004446/ENSMUSG00000061273/ENSMUSG00000031823/ENSMUSG00000048483/ENSMUSG00000024247/…	153
GO:0036465	synaptic vesicle recycling	63/7747	88/16212	0.715909	1.49817	4.48271	4.81636e-06	0.000199012	0.000140807	ENSMUSG00000028577/ENSMUSG00000024456/ENSMUSG00000029465/ENSMUSG00000020961/ENSMUSG00000033419/ENSMUSG00000002365/ENSMUSG00000023805/ENSMUSG00000022789/ENSMUSG00000028488/ENSMUSG00000024480/ENSMUSG00000021816/ENSMUSG00000031367/ENSMUSG00000040722/ENSMUSG00000018566/ENSMUSG00000051790/ENSMUSG00000020894/ENSMUSG00000033628/ENSMUSG00000023064/ENSMUSG00000031302/ENSMUSG00000036273/ENSMUSG00000062202/…	63
GO:0051962	positive regulation of nervous system development	208/7747	349/16212	0.595989	1.24721	4.46633	5.00664e-06	0.000205504	0.0001454	ENSMUSG00000022514/ENSMUSG00000026277/ENSMUSG00000027770/ENSMUSG00000022812/ENSMUSG00000020152/ENSMUSG00000000861/ENSMUSG00000020458/ENSMUSG00000026728/ENSMUSG00000032536/ENSMUSG00000006932/ENSMUSG00000021109/ENSMUSG00000021057/ENSMUSG00000027358/ENSMUSG00000030265/ENSMUSG00000019982/ENSMUSG00000019970/ENSMUSG00000025789/ENSMUSG00000024621/ENSMUSG00000049107/ENSMUSG00000004455/ENSMUSG00000008153/…	208
GO:0018205	peptidyl-lysine modification	84/7747	124/16212	0.677419	1.41762	4.46583	5.26736e-06	0.000214783	0.000151965	ENSMUSG00000000861/ENSMUSG00000006932/ENSMUSG00000037111/ENSMUSG00000018395/ENSMUSG00000038418/ENSMUSG00000031671/ENSMUSG00000037868/ENSMUSG00000033075/ENSMUSG00000003226/ENSMUSG00000029524/ENSMUSG00000024943/ENSMUSG00000036893/ENSMUSG00000024529/ENSMUSG00000045160/ENSMUSG00000039253/ENSMUSG00000007817/ENSMUSG00000024293/ENSMUSG00000034252/ENSMUSG00000038909/ENSMUSG00000034205/ENSMUSG00000001555/…	84
GO:0030509	BMP signaling pathway	96/7747	145/16212	0.662069	1.3855	4.46065	5.38457e-06	0.000218128	0.000154332	ENSMUSG00000022816/ENSMUSG00000044674/ENSMUSG00000031681/ENSMUSG00000021096/ENSMUSG00000027358/ENSMUSG00000021944/ENSMUSG00000070509/ENSMUSG00000008999/ENSMUSG00000038418/ENSMUSG00000033014/ENSMUSG00000067336/ENSMUSG00000021464/ENSMUSG00000036580/ENSMUSG00000056004/ENSMUSG00000061436/ENSMUSG00000020802/ENSMUSG00000039153/ENSMUSG00000005836/ENSMUSG00000042377/ENSMUSG00000042275/ENSMUSG00000001507/…	96
GO:0043489	RNA stabilization	52/7747	70/16212	0.742857	1.55456	4.44815	5.5783e-06	0.000224509	0.000158846	ENSMUSG00000027770/ENSMUSG00000023087/ENSMUSG00000044595/ENSMUSG00000032265/ENSMUSG00000032423/ENSMUSG00000027510/ENSMUSG00000062078/ENSMUSG00000068823/ENSMUSG00000022283/ENSMUSG00000026942/ENSMUSG00000023951/ENSMUSG00000043962/ENSMUSG00000028639/ENSMUSG00000021179/ENSMUSG00000037331/ENSMUSG00000008301/ENSMUSG00000000142/ENSMUSG00000031403/ENSMUSG00000018554/ENSMUSG00000044468/ENSMUSG00000025451/…	52
GO:0006839	mitochondrial transport	105/7747	161/16212	0.652174	1.36479	4.45005	5.64138e-06	0.000225582	0.000159606	ENSMUSG00000026278/ENSMUSG00000022812/ENSMUSG00000020321/ENSMUSG00000020464/ENSMUSG00000054099/ENSMUSG00000032519/ENSMUSG00000020402/ENSMUSG00000020361/ENSMUSG00000001729/ENSMUSG00000064326/ENSMUSG00000021270/ENSMUSG00000021265/ENSMUSG00000079055/ENSMUSG00000000915/ENSMUSG00000021109/ENSMUSG00000024617/ENSMUSG00000004902/ENSMUSG00000004446/ENSMUSG00000000738/ENSMUSG00000019969/ENSMUSG00000032754/…	105
GO:0018105	peptidyl-serine phosphorylation	119/7747	186/16212	0.639785	1.33887	4.44662	5.69829e-06	0.000226397	0.000160183	ENSMUSG00000032409/ENSMUSG00000022812/ENSMUSG00000028078/ENSMUSG00000035992/ENSMUSG00000001729/ENSMUSG00000007411/ENSMUSG00000024576/ENSMUSG00000024617/ENSMUSG00000049107/ENSMUSG00000032652/ENSMUSG00000045962/ENSMUSG00000038379/ENSMUSG00000027513/ENSMUSG00000031668/ENSMUSG00000057329/ENSMUSG00000029361/ENSMUSG00000022114/ENSMUSG00000021457/ENSMUSG00000054051/ENSMUSG00000061436/ENSMUSG00000026034/…	119
GO:0045859	regulation of protein kinase activity	246/7747	421/16212	0.584323	1.2228	4.43112	5.81925e-06	0.000228474	0.000161652	ENSMUSG00000036894/ENSMUSG00000016984/ENSMUSG00000031714/ENSMUSG00000001729/ENSMUSG00000021270/ENSMUSG00000079055/ENSMUSG00000027358/ENSMUSG00000019850/ENSMUSG00000071369/ENSMUSG00000029468/ENSMUSG00000024427/ENSMUSG00000036585/ENSMUSG00000024621/ENSMUSG00000024620/ENSMUSG00000049107/ENSMUSG00000004266/ENSMUSG00000046733/ENSMUSG00000003031/ENSMUSG00000030201/ENSMUSG00000029616/ENSMUSG00000031959/…	246
GO:0050779	RNA destabilization	64/7747	90/16212	0.711111	1.48813	4.44226	5.85772e-06	0.000228474	0.000161652	ENSMUSG00000027770/ENSMUSG00000020464/ENSMUSG00000023087/ENSMUSG00000044595/ENSMUSG00000041477/ENSMUSG00000017478/ENSMUSG00000032423/ENSMUSG00000068823/ENSMUSG00000002227/ENSMUSG00000022283/ENSMUSG00000020166/ENSMUSG00000029423/ENSMUSG00000042650/ENSMUSG00000024472/ENSMUSG00000038848/ENSMUSG00000028842/ENSMUSG00000005506/ENSMUSG00000028580/ENSMUSG00000028639/ENSMUSG00000020515/ENSMUSG00000020580/…	64
GO:0046847	filopodium assembly	55/7747	75/16212	0.733333	1.53463	4.43949	5.86113e-06	0.000228474	0.000161652	ENSMUSG00000026778/ENSMUSG00000024501/ENSMUSG00000021253/ENSMUSG00000024143/ENSMUSG00000052397/ENSMUSG00000022783/ENSMUSG00000025810/ENSMUSG00000037509/ENSMUSG00000020758/ENSMUSG00000022272/ENSMUSG00000061665/ENSMUSG00000015605/ENSMUSG00000038976/ENSMUSG00000027329/ENSMUSG00000039735/ENSMUSG00000038827/ENSMUSG00000007613/ENSMUSG00000037754/ENSMUSG00000009292/ENSMUSG00000040260/ENSMUSG00000043895/…	55
GO:0061157	mRNA destabilization	61/7747	85/16212	0.717647	1.50181	4.43738	5.97795e-06	0.000230489	0.000163078	ENSMUSG00000027770/ENSMUSG00000020464/ENSMUSG00000023087/ENSMUSG00000044595/ENSMUSG00000041477/ENSMUSG00000032423/ENSMUSG00000068823/ENSMUSG00000002227/ENSMUSG00000022283/ENSMUSG00000020166/ENSMUSG00000029423/ENSMUSG00000042650/ENSMUSG00000024472/ENSMUSG00000038848/ENSMUSG00000028842/ENSMUSG00000005506/ENSMUSG00000028580/ENSMUSG00000028639/ENSMUSG00000020515/ENSMUSG00000020580/ENSMUSG00000037573/…	61
GO:0003151	outflow tract morphogenesis	58/7747	80/16212	0.725	1.51719	4.43621	5.98721e-06	0.000230489	0.000163078	ENSMUSG00000044674/ENSMUSG00000006932/ENSMUSG00000031616/ENSMUSG00000051367/ENSMUSG00000021109/ENSMUSG00000021944/ENSMUSG00000005583/ENSMUSG00000039910/ENSMUSG00000030201/ENSMUSG00000008999/ENSMUSG00000025810/ENSMUSG00000018604/ENSMUSG00000067336/ENSMUSG00000028023/ENSMUSG00000001052/ENSMUSG00000023951/ENSMUSG00000027276/ENSMUSG00000032744/ENSMUSG00000040289/ENSMUSG00000005836/ENSMUSG00000042258/…	58
GO:0036503	ERAD pathway	71/7747	102/16212	0.696078	1.45667	4.42602	6.35393e-06	0.000243097	0.000171998	ENSMUSG00000002190/ENSMUSG00000005078/ENSMUSG00000075701/ENSMUSG00000020964/ENSMUSG00000028277/ENSMUSG00000031668/ENSMUSG00000052656/ENSMUSG00000036646/ENSMUSG00000035235/ENSMUSG00000037470/ENSMUSG00000020715/ENSMUSG00000078622/ENSMUSG00000003746/ENSMUSG00000047879/ENSMUSG00000020109/ENSMUSG00000023286/ENSMUSG00000047586/ENSMUSG00000022365/ENSMUSG00000037075/ENSMUSG00000024392/ENSMUSG00000025198/…	71
GO:0010639	negative regulation of organelle organization	208/7747	350/16212	0.594286	1.24365	4.40839	6.54427e-06	0.000248843	0.000176064	ENSMUSG00000026278/ENSMUSG00000033149/ENSMUSG00000020315/ENSMUSG00000035992/ENSMUSG00000020380/ENSMUSG00000001729/ENSMUSG00000021262/ENSMUSG00000000915/ENSMUSG00000021061/ENSMUSG00000029414/ENSMUSG00000019970/ENSMUSG00000030516/ENSMUSG00000008153/ENSMUSG00000030357/ENSMUSG00000021218/ENSMUSG00000031826/ENSMUSG00000033862/ENSMUSG00000031921/ENSMUSG00000033430/ENSMUSG00000021044/ENSMUSG00000038379/…	208
GO:0043524	negative regulation of neuron apoptotic process	121/7747	190/16212	0.636842	1.33271	4.41305	6.65463e-06	0.000251496	0.000177941	ENSMUSG00000026278/ENSMUSG00000020128/ENSMUSG00000044674/ENSMUSG00000006932/ENSMUSG00000051367/ENSMUSG00000021109/ENSMUSG00000026317/ENSMUSG00000030265/ENSMUSG00000005583/ENSMUSG00000029475/ENSMUSG00000049107/ENSMUSG00000079036/ENSMUSG00000021253/ENSMUSG00000019969/ENSMUSG00000024151/ENSMUSG00000006818/ENSMUSG00000022674/ENSMUSG00000025810/ENSMUSG00000027859/ENSMUSG00000057329/ENSMUSG00000029361/…	121
GO:0016197	endosomal transport	160/7747	261/16212	0.613027	1.28287	4.40728	6.70852e-06	0.000251764	0.000178131	ENSMUSG00000020128/ENSMUSG00000051355/ENSMUSG00000026718/ENSMUSG00000032560/ENSMUSG00000074513/ENSMUSG00000028080/ENSMUSG00000037526/ENSMUSG00000036291/ENSMUSG00000021057/ENSMUSG00000030245/ENSMUSG00000021589/ENSMUSG00000019854/ENSMUSG00000019998/ENSMUSG00000029462/ENSMUSG00000020375/ENSMUSG00000024101/ENSMUSG00000030172/ENSMUSG00000027522/ENSMUSG00000024127/ENSMUSG00000002365/ENSMUSG00000052397/…	160
GO:0031503	protein-containing complex localization	154/7747	250/16212	0.616	1.28909	4.40677	6.74296e-06	0.000251764	0.000178131	ENSMUSG00000022812/ENSMUSG00000020290/ENSMUSG00000049630/ENSMUSG00000040537/ENSMUSG00000025786/ENSMUSG00000018395/ENSMUSG00000021281/ENSMUSG00000021057/ENSMUSG00000047454/ENSMUSG00000019998/ENSMUSG00000028576/ENSMUSG00000029469/ENSMUSG00000024617/ENSMUSG00000030352/ENSMUSG00000030357/ENSMUSG00000032258/ENSMUSG00000028291/ENSMUSG00000058006/ENSMUSG00000024253/ENSMUSG00000052397/ENSMUSG00000006740/…	154
GO:0035148	tube formation	107/7747	165/16212	0.648485	1.35707	4.41021	6.788e-06	0.000251928	0.000178247	ENSMUSG00000006932/ENSMUSG00000051367/ENSMUSG00000021109/ENSMUSG00000021048/ENSMUSG00000039910/ENSMUSG00000029475/ENSMUSG00000070509/ENSMUSG00000038593/ENSMUSG00000030201/ENSMUSG00000028284/ENSMUSG00000008999/ENSMUSG00000026976/ENSMUSG00000060733/ENSMUSG00000003227/ENSMUSG00000021466/ENSMUSG00000062352/ENSMUSG00000028017/ENSMUSG00000001052/ENSMUSG00000023951/ENSMUSG00000023972/ENSMUSG00000035247/…	107
GO:0060541	respiratory system development	155/7747	252/16212	0.615079	1.28716	4.39515	7.10983e-06	0.000262302	0.000185586	ENSMUSG00000025958/ENSMUSG00000006932/ENSMUSG00000064325/ENSMUSG00000027737/ENSMUSG00000051367/ENSMUSG00000027358/ENSMUSG00000021944/ENSMUSG00000030265/ENSMUSG00000045680/ENSMUSG00000019997/ENSMUSG00000015134/ENSMUSG00000036585/ENSMUSG00000024620/ENSMUSG00000036545/ENSMUSG00000030201/ENSMUSG00000031825/ENSMUSG00000042812/ENSMUSG00000069895/ENSMUSG00000021253/ENSMUSG00000016256/ENSMUSG00000024247/…	155
GO:0010720	positive regulation of cell development	287/7747	500/16212	0.574	1.2012	4.37173	7.54897e-06	0.000276855	0.000195883	ENSMUSG00000025958/ENSMUSG00000022508/ENSMUSG00000026277/ENSMUSG00000027770/ENSMUSG00000022812/ENSMUSG00000020152/ENSMUSG00000000861/ENSMUSG00000020458/ENSMUSG00000026728/ENSMUSG00000001467/ENSMUSG00000032536/ENSMUSG00000006932/ENSMUSG00000031712/ENSMUSG00000018899/ENSMUSG00000021270/ENSMUSG00000021109/ENSMUSG00000021057/ENSMUSG00000033454/ENSMUSG00000027358/ENSMUSG00000041741/ENSMUSG00000022185/…	287
GO:0072001	renal system development	206/7747	347/16212	0.59366	1.24234	4.36546	7.96991e-06	0.000290573	0.000205589	ENSMUSG00000026768/ENSMUSG00000006932/ENSMUSG00000031616/ENSMUSG00000031681/ENSMUSG00000018395/ENSMUSG00000051367/ENSMUSG00000027358/ENSMUSG00000030247/ENSMUSG00000005583/ENSMUSG00000045680/ENSMUSG00000036585/ENSMUSG00000024620/ENSMUSG00000042812/ENSMUSG00000004791/ENSMUSG00000032419/ENSMUSG00000008999/ENSMUSG00000045394/ENSMUSG00000025810/ENSMUSG00000038418/ENSMUSG00000027840/ENSMUSG00000026976/…	206
GO:0050769	positive regulation of neurogenesis	177/7747	293/16212	0.604096	1.26418	4.36549	8.06286e-06	0.000292243	0.00020677	ENSMUSG00000026277/ENSMUSG00000027770/ENSMUSG00000022812/ENSMUSG00000020152/ENSMUSG00000000861/ENSMUSG00000020458/ENSMUSG00000026728/ENSMUSG00000032536/ENSMUSG00000006932/ENSMUSG00000021109/ENSMUSG00000021057/ENSMUSG00000027358/ENSMUSG00000030265/ENSMUSG00000019982/ENSMUSG00000019970/ENSMUSG00000024621/ENSMUSG00000049107/ENSMUSG00000004455/ENSMUSG00000042589/ENSMUSG00000052934/ENSMUSG00000040010/…	177
GO:0032868	response to insulin	164/7747	269/16212	0.609665	1.27584	4.36414	8.15961e-06	0.000294031	0.000208035	ENSMUSG00000047443/ENSMUSG00000022812/ENSMUSG00000045658/ENSMUSG00000001729/ENSMUSG00000059436/ENSMUSG00000030247/ENSMUSG00000026778/ENSMUSG00000019970/ENSMUSG00000024353/ENSMUSG00000034105/ENSMUSG00000031823/ENSMUSG00000043733/ENSMUSG00000027513/ENSMUSG00000024143/ENSMUSG00000026737/ENSMUSG00000038418/ENSMUSG00000068747/ENSMUSG00000037868/ENSMUSG00000033083/ENSMUSG00000022111/ENSMUSG00000038894/…	164
GO:0008589	regulation of smoothened signaling pathway	66/7747	94/16212	0.702128	1.46933	4.3656	8.43245e-06	0.000300604	0.000212686	ENSMUSG00000064325/ENSMUSG00000032640/ENSMUSG00000029469/ENSMUSG00000054008/ENSMUSG00000038593/ENSMUSG00000021466/ENSMUSG00000022105/ENSMUSG00000039153/ENSMUSG00000024118/ENSMUSG00000042258/ENSMUSG00000021782/ENSMUSG00000021497/ENSMUSG00000026424/ENSMUSG00000032308/ENSMUSG00000020372/ENSMUSG00000001761/ENSMUSG00000045039/ENSMUSG00000034292/ENSMUSG00000040836/ENSMUSG00000021483/ENSMUSG00000047248/…	66
GO:0050673	epithelial cell proliferation	261/7747	451/16212	0.578714	1.21106	4.34879	8.43904e-06	0.000300604	0.000212686	ENSMUSG00000022510/ENSMUSG00000037936/ENSMUSG00000020458/ENSMUSG00000000600/ENSMUSG00000040274/ENSMUSG00000006932/ENSMUSG00000031616/ENSMUSG00000018395/ENSMUSG00000001729/ENSMUSG00000048251/ENSMUSG00000051367/ENSMUSG00000027356/ENSMUSG00000030283/ENSMUSG00000005583/ENSMUSG00000019850/ENSMUSG00000028576/ENSMUSG00000043991/ENSMUSG00000036585/ENSMUSG00000003031/ENSMUSG00000030201/ENSMUSG00000004446/…	261
GO:0032231	regulation of actin filament bundle assembly	73/7747	106/16212	0.688679	1.44119	4.35952	8.68424e-06	0.000307571	0.000217615	ENSMUSG00000033149/ENSMUSG00000020388/ENSMUSG00000021262/ENSMUSG00000026778/ENSMUSG00000019997/ENSMUSG00000030516/ENSMUSG00000043079/ENSMUSG00000021253/ENSMUSG00000025810/ENSMUSG00000002233/ENSMUSG00000022469/ENSMUSG00000062352/ENSMUSG00000027274/ENSMUSG00000021754/ENSMUSG00000021013/ENSMUSG00000061762/ENSMUSG00000031355/ENSMUSG00000020580/ENSMUSG00000030043/ENSMUSG00000031328/ENSMUSG00000042099/…	73
GO:2000036	regulation of stem cell population maintenance	51/7747	69/16212	0.73913	1.54676	4.35402	8.76146e-06	0.000308543	0.000218303	ENSMUSG00000022510/ENSMUSG00000048118/ENSMUSG00000029438/ENSMUSG00000029475/ENSMUSG00000030353/ENSMUSG00000008999/ENSMUSG00000026976/ENSMUSG00000053470/ENSMUSG00000055799/ENSMUSG00000039985/ENSMUSG00000020166/ENSMUSG00000066900/ENSMUSG00000045969/ENSMUSG00000029838/ENSMUSG00000022000/ENSMUSG00000036568/ENSMUSG00000057236/ENSMUSG00000037013/ENSMUSG00000034205/ENSMUSG00000020519/ENSMUSG00000031353/…	51
GO:0051146	striated muscle cell differentiation	195/7747	327/16212	0.59633	1.24793	4.33277	9.28336e-06	0.000325075	0.00023	ENSMUSG00000022812/ENSMUSG00000020160/ENSMUSG00000063275/ENSMUSG00000001729/ENSMUSG00000051367/ENSMUSG00000027358/ENSMUSG00000021944/ENSMUSG00000030247/ENSMUSG00000030265/ENSMUSG00000005583/ENSMUSG00000066406/ENSMUSG00000030557/ENSMUSG00000024454/ENSMUSG00000024431/ENSMUSG00000024621/ENSMUSG00000024620/ENSMUSG00000030342/ENSMUSG00000032419/ENSMUSG00000027510/ENSMUSG00000024240/ENSMUSG00000018604/…	195
GO:0045444	fat cell differentiation	143/7747	231/16212	0.619048	1.29547	4.32688	9.7648e-06	0.000340013	0.000240569	ENSMUSG00000025958/ENSMUSG00000022812/ENSMUSG00000023087/ENSMUSG00000001729/ENSMUSG00000044548/ENSMUSG00000051367/ENSMUSG00000027358/ENSMUSG00000030247/ENSMUSG00000054434/ENSMUSG00000032652/ENSMUSG00000030201/ENSMUSG00000030170/ENSMUSG00000009112/ENSMUSG00000034271/ENSMUSG00000008999/ENSMUSG00000006818/ENSMUSG00000061013/ENSMUSG00000068747/ENSMUSG00000031668/ENSMUSG00000037868/ENSMUSG00000019947/…	143
GO:0001822	kidney development	198/7747	333/16212	0.594595	1.2443	4.3091	1.03165e-05	0.000357215	0.00025274	ENSMUSG00000026768/ENSMUSG00000006932/ENSMUSG00000031616/ENSMUSG00000031681/ENSMUSG00000018395/ENSMUSG00000051367/ENSMUSG00000027358/ENSMUSG00000030247/ENSMUSG00000005583/ENSMUSG00000045680/ENSMUSG00000036585/ENSMUSG00000024620/ENSMUSG00000004791/ENSMUSG00000008999/ENSMUSG00000045394/ENSMUSG00000025810/ENSMUSG00000038418/ENSMUSG00000027840/ENSMUSG00000026976/ENSMUSG00000019947/ENSMUSG00000014329/…	198
GO:0031400	negative regulation of protein modification process	216/7747	367/16212	0.588556	1.23166	4.29433	1.09471e-05	0.000376946	0.0002667	ENSMUSG00000034422/ENSMUSG00000049502/ENSMUSG00000022812/ENSMUSG00000045671/ENSMUSG00000045658/ENSMUSG00000006932/ENSMUSG00000018899/ENSMUSG00000020361/ENSMUSG00000001729/ENSMUSG00000079055/ENSMUSG00000037526/ENSMUSG00000027358/ENSMUSG00000019850/ENSMUSG00000028300/ENSMUSG00000028577/ENSMUSG00000015133/ENSMUSG00000024427/ENSMUSG00000057719/ENSMUSG00000049107/ENSMUSG00000004266/ENSMUSG00000046733/…	216
GO:0000380	alternative mRNA splicing, via spliceosome	55/7747	76/16212	0.723684	1.51444	4.30033	1.1358e-05	0.000388935	0.000275183	ENSMUSG00000027763/ENSMUSG00000037197/ENSMUSG00000064138/ENSMUSG00000010608/ENSMUSG00000022774/ENSMUSG00000060475/ENSMUSG00000005687/ENSMUSG00000063919/ENSMUSG00000029538/ENSMUSG00000028790/ENSMUSG00000043962/ENSMUSG00000005506/ENSMUSG00000028409/ENSMUSG00000028330/ENSMUSG00000034544/ENSMUSG00000021047/ENSMUSG00000046434/ENSMUSG00000029439/ENSMUSG00000059208/ENSMUSG00000030411/ENSMUSG00000040459/…	55
GO:0048285	organelle fission	265/7747	460/16212	0.576087	1.20557	4.27879	1.15456e-05	0.000393184	0.000278189	ENSMUSG00000022812/ENSMUSG00000043065/ENSMUSG00000020152/ENSMUSG00000036768/ENSMUSG00000032555/ENSMUSG00000033752/ENSMUSG00000037679/ENSMUSG00000054003/ENSMUSG00000055884/ENSMUSG00000021098/ENSMUSG00000059970/ENSMUSG00000029414/ENSMUSG00000041741/ENSMUSG00000041133/ENSMUSG00000019992/ENSMUSG00000029472/ENSMUSG00000029466/ENSMUSG00000024500/ENSMUSG00000024620/ENSMUSG00000003031/ENSMUSG00000030346/…	265
GO:0030178	negative regulation of Wnt signaling pathway	95/7747	145/16212	0.655172	1.37107	4.29365	1.16571e-05	0.000394813	0.000279342	ENSMUSG00000022812/ENSMUSG00000044674/ENSMUSG00000006932/ENSMUSG00000044548/ENSMUSG00000027358/ENSMUSG00000027356/ENSMUSG00000024576/ENSMUSG00000018583/ENSMUSG00000030201/ENSMUSG00000030170/ENSMUSG00000035274/ENSMUSG00000032419/ENSMUSG00000038418/ENSMUSG00000014329/ENSMUSG00000021464/ENSMUSG00000071856/ENSMUSG00000018822/ENSMUSG00000044365/ENSMUSG00000020733/ENSMUSG00000032717/ENSMUSG00000027253/…	95
GO:0045165	cell fate commitment	166/7747	274/16212	0.605839	1.26783	4.27734	1.20638e-05	0.000406366	0.000287516	ENSMUSG00000006932/ENSMUSG00000031616/ENSMUSG00000031681/ENSMUSG00000048251/ENSMUSG00000051367/ENSMUSG00000027358/ENSMUSG00000021944/ENSMUSG00000005583/ENSMUSG00000045591/ENSMUSG00000049107/ENSMUSG00000063870/ENSMUSG00000030353/ENSMUSG00000030170/ENSMUSG00000034258/ENSMUSG00000019969/ENSMUSG00000032419/ENSMUSG00000028640/ENSMUSG00000055817/ENSMUSG00000024140/ENSMUSG00000027840/ENSMUSG00000018604/…	166
GO:0072175	epithelial tube formation	100/7747	154/16212	0.649351	1.35888	4.28082	1.23187e-05	0.000412711	0.000292005	ENSMUSG00000006932/ENSMUSG00000051367/ENSMUSG00000021109/ENSMUSG00000021048/ENSMUSG00000039910/ENSMUSG00000029475/ENSMUSG00000070509/ENSMUSG00000038593/ENSMUSG00000030201/ENSMUSG00000028284/ENSMUSG00000008999/ENSMUSG00000026976/ENSMUSG00000060733/ENSMUSG00000021466/ENSMUSG00000028017/ENSMUSG00000001052/ENSMUSG00000023951/ENSMUSG00000023972/ENSMUSG00000035247/ENSMUSG00000026872/ENSMUSG00000030110/…	100
GO:0043434	response to peptide hormone	259/7747	449/16212	0.576837	1.20714	4.25813	1.26804e-05	0.000421601	0.000298295	ENSMUSG00000025958/ENSMUSG00000047443/ENSMUSG00000022812/ENSMUSG00000038845/ENSMUSG00000020464/ENSMUSG00000045658/ENSMUSG00000006932/ENSMUSG00000029388/ENSMUSG00000031616/ENSMUSG00000037161/ENSMUSG00000018899/ENSMUSG00000001729/ENSMUSG00000059436/ENSMUSG00000030247/ENSMUSG00000026778/ENSMUSG00000021587/ENSMUSG00000019970/ENSMUSG00000024353/ENSMUSG00000029467/ENSMUSG00000024617/ENSMUSG00000003031/…	259
GO:0060538	skeletal muscle organ development	125/7747	199/16212	0.628141	1.3145	4.27038	1.27201e-05	0.000421601	0.000298295	ENSMUSG00000027763/ENSMUSG00000020128/ENSMUSG00000006932/ENSMUSG00000051367/ENSMUSG00000027346/ENSMUSG00000021944/ENSMUSG00000030249/ENSMUSG00000030265/ENSMUSG00000005583/ENSMUSG00000039910/ENSMUSG00000045680/ENSMUSG00000030189/ENSMUSG00000034998/ENSMUSG00000024236/ENSMUSG00000038418/ENSMUSG00000055027/ENSMUSG00000073002/ENSMUSG00000037868/ENSMUSG00000057329/ENSMUSG00000025013/ENSMUSG00000025172/…	125
GO:0002040	sprouting angiogenesis	84/7747	126/16212	0.666667	1.39512	4.25941	1.36918e-05	0.000451393	0.000319374	ENSMUSG00000020458/ENSMUSG00000031681/ENSMUSG00000001729/ENSMUSG00000021109/ENSMUSG00000030516/ENSMUSG00000036585/ENSMUSG00000042594/ENSMUSG00000034258/ENSMUSG00000004791/ENSMUSG00000033960/ENSMUSG00000025810/ENSMUSG00000022475/ENSMUSG00000003032/ENSMUSG00000019647/ENSMUSG00000024754/ENSMUSG00000050666/ENSMUSG00000016128/ENSMUSG00000078202/ENSMUSG00000015093/ENSMUSG00000062352/ENSMUSG00000020700/…	84
GO:2000300	regulation of synaptic vesicle exocytosis	42/7747	55/16212	0.763636	1.59805	4.25006	1.39771e-05	0.00045611	0.000322711	ENSMUSG00000027765/ENSMUSG00000022829/ENSMUSG00000053025/ENSMUSG00000029468/ENSMUSG00000029467/ENSMUSG00000024127/ENSMUSG00000022789/ENSMUSG00000017412/ENSMUSG00000032890/ENSMUSG00000041670/ENSMUSG00000026452/ENSMUSG00000050965/ENSMUSG00000029030/ENSMUSG00000023032/ENSMUSG00000029503/ENSMUSG00000002413/ENSMUSG00000078816/ENSMUSG00000044359/ENSMUSG00000036273/ENSMUSG00000052889/ENSMUSG00000028456/…	42
GO:0003205	cardiac chamber development	116/7747	183/16212	0.63388	1.32651	4.24937	1.4049e-05	0.00045611	0.000322711	ENSMUSG00000044674/ENSMUSG00000006932/ENSMUSG00000031616/ENSMUSG00000021109/ENSMUSG00000027966/ENSMUSG00000027358/ENSMUSG00000021944/ENSMUSG00000030247/ENSMUSG00000005583/ENSMUSG00000039910/ENSMUSG00000054008/ENSMUSG00000030201/ENSMUSG00000042812/ENSMUSG00000008999/ENSMUSG00000025810/ENSMUSG00000018604/ENSMUSG00000026976/ENSMUSG00000041957/ENSMUSG00000048349/ENSMUSG00000067336/ENSMUSG00000020644/…	116
GO:0008154	actin polymerization or depolymerization	111/7747	174/16212	0.637931	1.33499	4.24996	1.40557e-05	0.00045611	0.000322711	ENSMUSG00000020315/ENSMUSG00000041842/ENSMUSG00000021262/ENSMUSG00000000915/ENSMUSG00000021061/ENSMUSG00000039031/ENSMUSG00000024456/ENSMUSG00000038524/ENSMUSG00000029465/ENSMUSG00000024101/ENSMUSG00000051586/ENSMUSG00000031827/ENSMUSG00000010154/ENSMUSG00000040852/ENSMUSG00000002365/ENSMUSG00000023094/ENSMUSG00000024236/ENSMUSG00000020476/ENSMUSG00000056737/ENSMUSG00000002812/ENSMUSG00000032702/…	111
GO:0051656	establishment of organelle localization	254/7747	440/16212	0.577273	1.20805	4.23257	1.4222e-05	0.000459106	0.00032483	ENSMUSG00000026277/ENSMUSG00000014602/ENSMUSG00000043065/ENSMUSG00000020149/ENSMUSG00000020290/ENSMUSG00000026718/ENSMUSG00000032536/ENSMUSG00000006932/ENSMUSG00000037161/ENSMUSG00000018707/ENSMUSG00000021076/ENSMUSG00000021109/ENSMUSG00000029468/ENSMUSG00000024454/ENSMUSG00000042992/ENSMUSG00000030352/ENSMUSG00000042812/ENSMUSG00000006585/ENSMUSG00000010154/ENSMUSG00000061048/ENSMUSG00000021248/…	254
GO:0045664	regulation of neuron differentiation	127/7747	203/16212	0.625616	1.30921	4.24115	1.44765e-05	0.000464897	0.000328928	ENSMUSG00000022508/ENSMUSG00000022812/ENSMUSG00000020160/ENSMUSG00000000861/ENSMUSG00000020458/ENSMUSG00000048251/ENSMUSG00000051367/ENSMUSG00000027358/ENSMUSG00000005583/ENSMUSG00000029603/ENSMUSG00000008999/ENSMUSG00000024238/ENSMUSG00000027859/ENSMUSG00000057329/ENSMUSG00000033952/ENSMUSG00000020644/ENSMUSG00000027276/ENSMUSG00000028654/ENSMUSG00000032744/ENSMUSG00000040289/ENSMUSG00000030110/…	127
GO:0098876	vesicle-mediated transport to the plasma membrane	98/7747	151/16212	0.649007	1.35816	4.23002	1.54918e-05	0.00049494	0.000350184	ENSMUSG00000022829/ENSMUSG00000051355/ENSMUSG00000020315/ENSMUSG00000015653/ENSMUSG00000021057/ENSMUSG00000029462/ENSMUSG00000024617/ENSMUSG00000024101/ENSMUSG00000027522/ENSMUSG00000024247/ENSMUSG00000024127/ENSMUSG00000036564/ENSMUSG00000073002/ENSMUSG00000069601/ENSMUSG00000020536/ENSMUSG00000029518/ENSMUSG00000026672/ENSMUSG00000038671/ENSMUSG00000024065/ENSMUSG00000024319/ENSMUSG00000020740/…	98
GO:0034446	substrate adhesion-dependent cell spreading	63/7747	90/16212	0.7	1.46488	4.23066	1.57079e-05	0.000497972	0.000352329	ENSMUSG00000020149/ENSMUSG00000026768/ENSMUSG00000024427/ENSMUSG00000025810/ENSMUSG00000041957/ENSMUSG00000019920/ENSMUSG00000041075/ENSMUSG00000032702/ENSMUSG00000004530/ENSMUSG00000062352/ENSMUSG00000024395/ENSMUSG00000057948/ENSMUSG00000049791/ENSMUSG00000058325/ENSMUSG00000041498/ENSMUSG00000054808/ENSMUSG00000031328/ENSMUSG00000074238/ENSMUSG00000002602/ENSMUSG00000027646/ENSMUSG00000022150/…	63
GO:0031331	positive regulation of cellular catabolic process	134/7747	216/16212	0.62037	1.29824	4.22125	1.57474e-05	0.000497972	0.000352329	ENSMUSG00000027761/ENSMUSG00000049502/ENSMUSG00000022812/ENSMUSG00000022708/ENSMUSG00000028082/ENSMUSG00000020402/ENSMUSG00000021109/ENSMUSG00000050473/ENSMUSG00000028300/ENSMUSG00000070509/ENSMUSG00000029468/ENSMUSG00000024442/ENSMUSG00000004446/ENSMUSG00000019969/ENSMUSG00000028284/ENSMUSG00000032741/ENSMUSG00000002365/ENSMUSG00000026737/ENSMUSG00000024283/ENSMUSG00000024286/ENSMUSG00000000001/…	134
GO:0010001	glial cell differentiation	166/7747	275/16212	0.603636	1.26322	4.21151	1.61576e-05	0.00050835	0.000359672	ENSMUSG00000026278/ENSMUSG00000020128/ENSMUSG00000020458/ENSMUSG00000026728/ENSMUSG00000040537/ENSMUSG00000006932/ENSMUSG00000029388/ENSMUSG00000001729/ENSMUSG00000079055/ENSMUSG00000027358/ENSMUSG00000030265/ENSMUSG00000026773/ENSMUSG00000020009/ENSMUSG00000024431/ENSMUSG00000024621/ENSMUSG00000049107/ENSMUSG00000030201/ENSMUSG00000033579/ENSMUSG00000043733/ENSMUSG00000004788/ENSMUSG00000019969/…	166
GO:0051402	neuron apoptotic process	204/7747	346/16212	0.589595	1.23384	4.20603	1.62725e-05	0.000509378	0.0003604	ENSMUSG00000022510/ENSMUSG00000026278/ENSMUSG00000022812/ENSMUSG00000038845/ENSMUSG00000020128/ENSMUSG00000044674/ENSMUSG00000006932/ENSMUSG00000027993/ENSMUSG00000020361/ENSMUSG00000051367/ENSMUSG00000021109/ENSMUSG00000059436/ENSMUSG00000021939/ENSMUSG00000029433/ENSMUSG00000026317/ENSMUSG00000030265/ENSMUSG00000005583/ENSMUSG00000071369/ENSMUSG00000019982/ENSMUSG00000029475/ENSMUSG00000025789/…	204
GO:0001825	blastocyst formation	40/7747	52/16212	0.769231	1.60975	4.21303	1.65107e-05	0.000514238	0.000363838	ENSMUSG00000020458/ENSMUSG00000039910/ENSMUSG00000030516/ENSMUSG00000030353/ENSMUSG00000028640/ENSMUSG00000020166/ENSMUSG00000015605/ENSMUSG00000063888/ENSMUSG00000023988/ENSMUSG00000037335/ENSMUSG00000001280/ENSMUSG00000024406/ENSMUSG00000053110/ENSMUSG00000041264/ENSMUSG00000037171/ENSMUSG00000004948/ENSMUSG00000004364/ENSMUSG00000002052/ENSMUSG00000020692/ENSMUSG00000020679/ENSMUSG00000008976/…	40
GO:0031345	negative regulation of cell projection organization	124/7747	198/16212	0.626263	1.31057	4.20627	1.69277e-05	0.000524588	0.000371161	ENSMUSG00000022812/ENSMUSG00000000861/ENSMUSG00000020467/ENSMUSG00000020458/ENSMUSG00000026728/ENSMUSG00000037161/ENSMUSG00000001729/ENSMUSG00000021262/ENSMUSG00000069171/ENSMUSG00000070509/ENSMUSG00000024456/ENSMUSG00000024501/ENSMUSG00000030357/ENSMUSG00000021218/ENSMUSG00000033862/ENSMUSG00000019969/ENSMUSG00000025810/ENSMUSG00000032913/ENSMUSG00000037855/ENSMUSG00000022114/ENSMUSG00000032702/…	124
GO:0035966	response to topologically incorrect protein	82/7747	123/16212	0.666667	1.39512	4.208	1.72641e-05	0.000532353	0.000376655	ENSMUSG00000026278/ENSMUSG00000021270/ENSMUSG00000005078/ENSMUSG00000040234/ENSMUSG00000075701/ENSMUSG00000024350/ENSMUSG00000028291/ENSMUSG00000054455/ENSMUSG00000031668/ENSMUSG00000041548/ENSMUSG00000026672/ENSMUSG00000053334/ENSMUSG00000038648/ENSMUSG00000020715/ENSMUSG00000027230/ENSMUSG00000032475/ENSMUSG00000021725/ENSMUSG00000020109/ENSMUSG00000023286/ENSMUSG00000022365/ENSMUSG00000015461/…	82
GO:0006302	double-strand break repair	168/7747	279/16212	0.602151	1.26011	4.19244	1.75527e-05	0.000538571	0.000381055	ENSMUSG00000032409/ENSMUSG00000049502/ENSMUSG00000034206/ENSMUSG00000020152/ENSMUSG00000020463/ENSMUSG00000032555/ENSMUSG00000020380/ENSMUSG00000055884/ENSMUSG00000021098/ENSMUSG00000027353/ENSMUSG00000029438/ENSMUSG00000021694/ENSMUSG00000038271/ENSMUSG00000063870/ENSMUSG00000030346/ENSMUSG00000001517/ENSMUSG00000035842/ENSMUSG00000030166/ENSMUSG00000010154/ENSMUSG00000033430/ENSMUSG00000033596/…	168
GO:0030324	lung development	136/7747	220/16212	0.618182	1.29366	4.19526	1.76401e-05	0.000538586	0.000381065	ENSMUSG00000025958/ENSMUSG00000006932/ENSMUSG00000064325/ENSMUSG00000027737/ENSMUSG00000027358/ENSMUSG00000021944/ENSMUSG00000030265/ENSMUSG00000045680/ENSMUSG00000019997/ENSMUSG00000036585/ENSMUSG00000024620/ENSMUSG00000036545/ENSMUSG00000031825/ENSMUSG00000042812/ENSMUSG00000069895/ENSMUSG00000021253/ENSMUSG00000016256/ENSMUSG00000024247/ENSMUSG00000024140/ENSMUSG00000027840/ENSMUSG00000048776/…	136
GO:0016236	macroautophagy	169/7747	281/16212	0.601423	1.25859	4.18309	1.82775e-05	0.000555312	0.000392899	ENSMUSG00000026280/ENSMUSG00000020149/ENSMUSG00000032557/ENSMUSG00000028080/ENSMUSG00000020402/ENSMUSG00000037526/ENSMUSG00000021109/ENSMUSG00000029434/ENSMUSG00000028300/ENSMUSG00000028577/ENSMUSG00000029467/ENSMUSG00000024442/ENSMUSG00000005069/ENSMUSG00000030161/ENSMUSG00000009112/ENSMUSG00000031950/ENSMUSG00000019969/ENSMUSG00000042628/ENSMUSG00000028284/ENSMUSG00000026737/ENSMUSG00000037683/…	169
GO:0030323	respiratory tube development	137/7747	222/16212	0.617117	1.29143	4.18257	1.86398e-05	0.000563559	0.000398734	ENSMUSG00000025958/ENSMUSG00000006932/ENSMUSG00000064325/ENSMUSG00000027737/ENSMUSG00000027358/ENSMUSG00000021944/ENSMUSG00000030265/ENSMUSG00000045680/ENSMUSG00000019997/ENSMUSG00000036585/ENSMUSG00000024620/ENSMUSG00000036545/ENSMUSG00000031825/ENSMUSG00000042812/ENSMUSG00000069895/ENSMUSG00000021253/ENSMUSG00000016256/ENSMUSG00000024247/ENSMUSG00000024140/ENSMUSG00000027840/ENSMUSG00000048776/…	137
GO:0006520	amino acid metabolic process	163/7747	270/16212	0.603704	1.26336	4.17462	1.90243e-05	0.000570883	0.000403916	ENSMUSG00000026279/ENSMUSG00000028085/ENSMUSG00000027737/ENSMUSG00000018906/ENSMUSG00000011148/ENSMUSG00000037686/ENSMUSG00000021048/ENSMUSG00000030268/ENSMUSG00000029445/ENSMUSG00000030515/ENSMUSG00000001380/ENSMUSG00000024493/ENSMUSG00000019278/ENSMUSG00000031948/ENSMUSG00000021033/ENSMUSG00000004789/ENSMUSG00000032263/ENSMUSG00000000673/ENSMUSG00000029597/ENSMUSG00000068739/ENSMUSG00000031672/…	163
GO:0061387	regulation of extent of cell growth	75/7747	111/16212	0.675676	1.41397	4.18664	1.90663e-05	0.000570883	0.000403916	ENSMUSG00000022812/ENSMUSG00000000861/ENSMUSG00000020458/ENSMUSG00000070509/ENSMUSG00000031729/ENSMUSG00000004788/ENSMUSG00000025810/ENSMUSG00000027859/ENSMUSG00000020476/ENSMUSG00000020132/ENSMUSG00000067336/ENSMUSG00000059363/ENSMUSG00000025020/ENSMUSG00000018820/ENSMUSG00000036580/ENSMUSG00000026965/ENSMUSG00000029765/ENSMUSG00000023951/ENSMUSG00000015605/ENSMUSG00000032547/ENSMUSG00000020389/…	75
GO:0000082	G1/S transition of mitotic cell cycle	126/7747	202/16212	0.623762	1.30534	4.17749	1.91888e-05	0.00057179	0.000404558	ENSMUSG00000063275/ENSMUSG00000040274/ENSMUSG00000001729/ENSMUSG00000017843/ENSMUSG00000044548/ENSMUSG00000029438/ENSMUSG00000019982/ENSMUSG00000024617/ENSMUSG00000004266/ENSMUSG00000003031/ENSMUSG00000004446/ENSMUSG00000052934/ENSMUSG00000033596/ENSMUSG00000027510/ENSMUSG00000024283/ENSMUSG00000027552/ENSMUSG00000057329/ENSMUSG00000038482/ENSMUSG00000049285/ENSMUSG00000003032/ENSMUSG00000028495/…	126
GO:0051650	establishment of vesicle localization	116/7747	184/16212	0.630435	1.3193	4.16701	2.02223e-05	0.000599702	0.000424307	ENSMUSG00000014602/ENSMUSG00000020149/ENSMUSG00000026718/ENSMUSG00000032536/ENSMUSG00000006932/ENSMUSG00000029468/ENSMUSG00000042992/ENSMUSG00000061048/ENSMUSG00000021248/ENSMUSG00000019969/ENSMUSG00000033419/ENSMUSG00000006740/ENSMUSG00000009907/ENSMUSG00000024480/ENSMUSG00000041609/ENSMUSG00000057948/ENSMUSG00000020792/ENSMUSG00000053580/ENSMUSG00000028779/ENSMUSG00000027273/ENSMUSG00000028847/…	116
GO:0000302	response to reactive oxygen species	127/7747	204/16212	0.622549	1.3028	4.16347	2.03906e-05	0.000600171	0.000424638	ENSMUSG00000026277/ENSMUSG00000020283/ENSMUSG00000031616/ENSMUSG00000001729/ENSMUSG00000021109/ENSMUSG00000030249/ENSMUSG00000019850/ENSMUSG00000071369/ENSMUSG00000033871/ENSMUSG00000024620/ENSMUSG00000005069/ENSMUSG00000021215/ENSMUSG00000003849/ENSMUSG00000021032/ENSMUSG00000006818/ENSMUSG00000035984/ENSMUSG00000027399/ENSMUSG00000057329/ENSMUSG00000003032/ENSMUSG00000021461/ENSMUSG00000035960/…	127
GO:0006893	Golgi to plasma membrane transport	46/7747	62/16212	0.741935	1.55263	4.17067	2.04318e-05	0.000600171	0.000424638	ENSMUSG00000022829/ENSMUSG00000051355/ENSMUSG00000020315/ENSMUSG00000015653/ENSMUSG00000024247/ENSMUSG00000024127/ENSMUSG00000073002/ENSMUSG00000069601/ENSMUSG00000020536/ENSMUSG00000026672/ENSMUSG00000038671/ENSMUSG00000020740/ENSMUSG00000020782/ENSMUSG00000033769/ENSMUSG00000032312/ENSMUSG00000023043/ENSMUSG00000020372/ENSMUSG00000020894/ENSMUSG00000031143/ENSMUSG00000046519/ENSMUSG00000022200/…	46
GO:0010976	positive regulation of neuron projection development	133/7747	215/16212	0.618605	1.29454	4.15916	2.07e-05	0.000605183	0.000428184	ENSMUSG00000027770/ENSMUSG00000020152/ENSMUSG00000000861/ENSMUSG00000044674/ENSMUSG00000049550/ENSMUSG00000070509/ENSMUSG00000024501/ENSMUSG00000030201/ENSMUSG00000042589/ENSMUSG00000044288/ENSMUSG00000008999/ENSMUSG00000095677/ENSMUSG00000062078/ENSMUSG00000022674/ENSMUSG00000027859/ENSMUSG00000050947/ENSMUSG00000036564/ENSMUSG00000020476/ENSMUSG00000030309/ENSMUSG00000022789/ENSMUSG00000055022/…	133
GO:0030041	actin filament polymerization	97/7747	150/16212	0.646667	1.35327	4.15822	2.12989e-05	0.000619768	0.000438504	ENSMUSG00000020315/ENSMUSG00000041842/ENSMUSG00000021262/ENSMUSG00000000915/ENSMUSG00000021061/ENSMUSG00000039031/ENSMUSG00000024456/ENSMUSG00000038524/ENSMUSG00000029465/ENSMUSG00000024101/ENSMUSG00000031827/ENSMUSG00000010154/ENSMUSG00000002365/ENSMUSG00000023094/ENSMUSG00000024236/ENSMUSG00000020476/ENSMUSG00000056737/ENSMUSG00000002812/ENSMUSG00000032702/ENSMUSG00000029840/ENSMUSG00000042121/…	97
GO:0051345	positive regulation of hydrolase activity	189/7747	319/16212	0.592476	1.23986	4.1392	2.19183e-05	0.00063481	0.000449146	ENSMUSG00000026278/ENSMUSG00000022812/ENSMUSG00000026727/ENSMUSG00000037533/ENSMUSG00000001729/ENSMUSG00000000915/ENSMUSG00000027358/ENSMUSG00000029433/ENSMUSG00000005583/ENSMUSG00000071369/ENSMUSG00000028300/ENSMUSG00000028577/ENSMUSG00000070509/ENSMUSG00000024451/ENSMUSG00000024493/ENSMUSG00000033871/ENSMUSG00000049107/ENSMUSG00000035842/ENSMUSG00000004446/ENSMUSG00000021215/ENSMUSG00000042700/…	189
GO:0001838	embryonic epithelial tube formation	93/7747	143/16212	0.65035	1.36097	4.14771	2.23683e-05	0.000644832	0.000456237	ENSMUSG00000006932/ENSMUSG00000051367/ENSMUSG00000021109/ENSMUSG00000021048/ENSMUSG00000039910/ENSMUSG00000029475/ENSMUSG00000070509/ENSMUSG00000038593/ENSMUSG00000030201/ENSMUSG00000028284/ENSMUSG00000008999/ENSMUSG00000026976/ENSMUSG00000060733/ENSMUSG00000021466/ENSMUSG00000001052/ENSMUSG00000023972/ENSMUSG00000035247/ENSMUSG00000026872/ENSMUSG00000030110/ENSMUSG00000024294/ENSMUSG00000037335/…	93
GO:0030837	negative regulation of actin filament polymerization	41/7747	54/16212	0.759259	1.58889	4.14661	2.25664e-05	0.000647529	0.000458146	ENSMUSG00000020315/ENSMUSG00000021262/ENSMUSG00000000915/ENSMUSG00000021061/ENSMUSG00000024236/ENSMUSG00000056737/ENSMUSG00000002812/ENSMUSG00000032702/ENSMUSG00000029840/ENSMUSG00000042121/ENSMUSG00000027274/ENSMUSG00000028328/ENSMUSG00000048096/ENSMUSG00000030000/ENSMUSG00000042099/ENSMUSG00000025235/ENSMUSG00000027995/ENSMUSG00000022451/ENSMUSG00000068566/ENSMUSG00000031558/ENSMUSG00000005628/…	41
GO:0008361	regulation of cell size	124/7747	199/16212	0.623116	1.30398	4.12759	2.38841e-05	0.000682182	0.000482663	ENSMUSG00000025958/ENSMUSG00000022812/ENSMUSG00000000861/ENSMUSG00000020458/ENSMUSG00000001729/ENSMUSG00000021270/ENSMUSG00000026317/ENSMUSG00000070509/ENSMUSG00000029468/ENSMUSG00000024493/ENSMUSG00000030109/ENSMUSG00000045962/ENSMUSG00000031729/ENSMUSG00000004788/ENSMUSG00000028284/ENSMUSG00000025810/ENSMUSG00000027859/ENSMUSG00000033721/ENSMUSG00000020476/ENSMUSG00000022469/ENSMUSG00000020132/…	124
GO:0010810	regulation of cell-substrate adhesion	130/7747	210/16212	0.619048	1.29547	4.12281	2.42883e-05	0.000683973	0.000483931	ENSMUSG00000022508/ENSMUSG00000022812/ENSMUSG00000033149/ENSMUSG00000063275/ENSMUSG00000026727/ENSMUSG00000040274/ENSMUSG00000021136/ENSMUSG00000027356/ENSMUSG00000024427/ENSMUSG00000042812/ENSMUSG00000043733/ENSMUSG00000025810/ENSMUSG00000014599/ENSMUSG00000057329/ENSMUSG00000041957/ENSMUSG00000019920/ENSMUSG00000041075/ENSMUSG00000032702/ENSMUSG00000004530/ENSMUSG00000029838/ENSMUSG00000062352/…	130
GO:0042303	molting cycle	81/7747	122/16212	0.663934	1.3894	4.13009	2.43785e-05	0.000683973	0.000483931	ENSMUSG00000022510/ENSMUSG00000034066/ENSMUSG00000006932/ENSMUSG00000001729/ENSMUSG00000027356/ENSMUSG00000061048/ENSMUSG00000033579/ENSMUSG00000019969/ENSMUSG00000027523/ENSMUSG00000028640/ENSMUSG00000057329/ENSMUSG00000003227/ENSMUSG00000028403/ENSMUSG00000046470/ENSMUSG00000043207/ENSMUSG00000027253/ENSMUSG00000070990/ENSMUSG00000039706/ENSMUSG00000053797/ENSMUSG00000035557/ENSMUSG00000001751/…	81
GO:0042633	hair cycle	81/7747	122/16212	0.663934	1.3894	4.13009	2.43785e-05	0.000683973	0.000483931	ENSMUSG00000022510/ENSMUSG00000034066/ENSMUSG00000006932/ENSMUSG00000001729/ENSMUSG00000027356/ENSMUSG00000061048/ENSMUSG00000033579/ENSMUSG00000019969/ENSMUSG00000027523/ENSMUSG00000028640/ENSMUSG00000057329/ENSMUSG00000003227/ENSMUSG00000028403/ENSMUSG00000046470/ENSMUSG00000043207/ENSMUSG00000027253/ENSMUSG00000070990/ENSMUSG00000039706/ENSMUSG00000053797/ENSMUSG00000035557/ENSMUSG00000001751/…	81
GO:0034329	cell junction assembly	282/7747	496/16212	0.568548	1.18979	4.10679	2.43882e-05	0.000683973	0.000483931	ENSMUSG00000022514/ENSMUSG00000038148/ENSMUSG00000022812/ENSMUSG00000022790/ENSMUSG00000033149/ENSMUSG00000022656/ENSMUSG00000020458/ENSMUSG00000049630/ENSMUSG00000044674/ENSMUSG00000006932/ENSMUSG00000051367/ENSMUSG00000021057/ENSMUSG00000030247/ENSMUSG00000005583/ENSMUSG00000025789/ENSMUSG00000030516/ENSMUSG00000060275/ENSMUSG00000030342/ENSMUSG00000063870/ENSMUSG00000008153/ENSMUSG00000042589/…	282
GO:0043254	regulation of protein-containing complex assembly	229/7747	395/16212	0.579747	1.21323	4.10424	2.50753e-05	0.000700077	0.000495324	ENSMUSG00000032409/ENSMUSG00000025958/ENSMUSG00000034066/ENSMUSG00000022812/ENSMUSG00000020315/ENSMUSG00000032532/ENSMUSG00000035992/ENSMUSG00000018398/ENSMUSG00000021270/ENSMUSG00000021262/ENSMUSG00000044548/ENSMUSG00000000915/ENSMUSG00000021061/ENSMUSG00000027356/ENSMUSG00000049550/ENSMUSG00000019970/ENSMUSG00000039031/ENSMUSG00000038524/ENSMUSG00000029465/ENSMUSG00000024576/ENSMUSG00000005069/…	229
GO:0010631	epithelial cell migration	66/7747	96/16212	0.6875	1.43872	4.12431	2.52554e-05	0.000701942	0.000496644	ENSMUSG00000020458/ENSMUSG00000026728/ENSMUSG00000021262/ENSMUSG00000021109/ENSMUSG00000027356/ENSMUSG00000024486/ENSMUSG00000055333/ENSMUSG00000001672/ENSMUSG00000043733/ENSMUSG00000024277/ENSMUSG00000038894/ENSMUSG00000067336/ENSMUSG00000032702/ENSMUSG00000071856/ENSMUSG00000004530/ENSMUSG00000026872/ENSMUSG00000028434/ENSMUSG00000001507/ENSMUSG00000058325/ENSMUSG00000061762/ENSMUSG00000026457/…	66
GO:0060411	cardiac septum morphogenesis	53/7747	74/16212	0.716216	1.49881	4.11421	2.65028e-05	0.000733322	0.000518846	ENSMUSG00000044674/ENSMUSG00000021944/ENSMUSG00000039910/ENSMUSG00000030201/ENSMUSG00000008999/ENSMUSG00000025810/ENSMUSG00000018604/ENSMUSG00000067336/ENSMUSG00000020644/ENSMUSG00000028023/ENSMUSG00000027276/ENSMUSG00000032744/ENSMUSG00000040289/ENSMUSG00000005836/ENSMUSG00000042258/ENSMUSG00000037335/ENSMUSG00000059552/ENSMUSG00000001761/ENSMUSG00000007613/ENSMUSG00000021796/ENSMUSG00000031558/…	53
GO:0043535	regulation of blood vessel endothelial cell migration	63/7747	91/16212	0.692308	1.44878	4.10691	2.73076e-05	0.00075103	0.000531376	ENSMUSG00000031714/ENSMUSG00000001729/ENSMUSG00000021109/ENSMUSG00000005583/ENSMUSG00000029470/ENSMUSG00000021256/ENSMUSG00000033960/ENSMUSG00000025810/ENSMUSG00000022475/ENSMUSG00000003032/ENSMUSG00000016128/ENSMUSG00000062352/ENSMUSG00000020700/ENSMUSG00000023951/ENSMUSG00000021701/ENSMUSG00000061119/ENSMUSG00000048373/ENSMUSG00000001552/ENSMUSG00000050965/ENSMUSG00000001280/ENSMUSG00000000530/…	63
GO:0030534	adult behavior	110/7747	174/16212	0.632184	1.32296	4.09737	2.74862e-05	0.00075103	0.000531376	ENSMUSG00000022523/ENSMUSG00000040537/ENSMUSG00000027737/ENSMUSG00000026317/ENSMUSG00000000263/ENSMUSG00000027859/ENSMUSG00000040389/ENSMUSG00000029361/ENSMUSG00000022111/ENSMUSG00000042372/ENSMUSG00000059363/ENSMUSG00000017412/ENSMUSG00000027577/ENSMUSG00000026959/ENSMUSG00000061436/ENSMUSG00000020644/ENSMUSG00000043207/ENSMUSG00000028657/ENSMUSG00000028580/ENSMUSG00000024413/ENSMUSG00000028328/…	110
GO:0006605	protein targeting	158/7747	262/16212	0.603053	1.262	4.09004	2.75063e-05	0.00075103	0.000531376	ENSMUSG00000026273/ENSMUSG00000036304/ENSMUSG00000020128/ENSMUSG00000005907/ENSMUSG00000032536/ENSMUSG00000025786/ENSMUSG00000037161/ENSMUSG00000020361/ENSMUSG00000021270/ENSMUSG00000066278/ENSMUSG00000037526/ENSMUSG00000020003/ENSMUSG00000024500/ENSMUSG00000005069/ENSMUSG00000004446/ENSMUSG00000031823/ENSMUSG00000048483/ENSMUSG00000024107/ENSMUSG00000034265/ENSMUSG00000068747/ENSMUSG00000069601/…	158
GO:1990138	neuron projection extension	116/7747	185/16212	0.627027	1.31217	4.08513	2.88467e-05	0.000784174	0.000554826	ENSMUSG00000022812/ENSMUSG00000000861/ENSMUSG00000020458/ENSMUSG00000006932/ENSMUSG00000031616/ENSMUSG00000028300/ENSMUSG00000028577/ENSMUSG00000025789/ENSMUSG00000024497/ENSMUSG00000024621/ENSMUSG00000008153/ENSMUSG00000004788/ENSMUSG00000029602/ENSMUSG00000027524/ENSMUSG00000022783/ENSMUSG00000026014/ENSMUSG00000025810/ENSMUSG00000027859/ENSMUSG00000020476/ENSMUSG00000020132/ENSMUSG00000067336/…	116
GO:0031929	TOR signaling	102/7747	160/16212	0.6375	1.33408	4.06265	3.2106e-05	0.000868964	0.000614817	ENSMUSG00000022812/ENSMUSG00000035992/ENSMUSG00000001729/ENSMUSG00000021109/ENSMUSG00000028300/ENSMUSG00000024454/ENSMUSG00000024493/ENSMUSG00000024576/ENSMUSG00000001518/ENSMUSG00000034105/ENSMUSG00000031959/ENSMUSG00000028278/ENSMUSG00000024283/ENSMUSG00000019927/ENSMUSG00000047496/ENSMUSG00000031444/ENSMUSG00000031451/ENSMUSG00000028495/ENSMUSG00000049323/ENSMUSG00000035953/ENSMUSG00000021457/…	102
GO:0051223	regulation of protein transport	276/7747	486/16212	0.567901	1.18844	4.03489	3.31789e-05	0.000894098	0.0006326	ENSMUSG00000051980/ENSMUSG00000022829/ENSMUSG00000022812/ENSMUSG00000051355/ENSMUSG00000020290/ENSMUSG00000003161/ENSMUSG00000001467/ENSMUSG00000074513/ENSMUSG00000027737/ENSMUSG00000018395/ENSMUSG00000018398/ENSMUSG00000021270/ENSMUSG00000021096/ENSMUSG00000034435/ENSMUSG00000021109/ENSMUSG00000021057/ENSMUSG00000045502/ENSMUSG00000027356/ENSMUSG00000040234/ENSMUSG00000026778/ENSMUSG00000021587/…	276
GO:0045786	negative regulation of cell cycle	204/7747	349/16212	0.584527	1.22323	4.03301	3.4292e-05	0.000919712	0.000650722	ENSMUSG00000032409/ENSMUSG00000068428/ENSMUSG00000049502/ENSMUSG00000016984/ENSMUSG00000040274/ENSMUSG00000006932/ENSMUSG00000032555/ENSMUSG00000020380/ENSMUSG00000021285/ENSMUSG00000017843/ENSMUSG00000044548/ENSMUSG00000029414/ENSMUSG00000027358/ENSMUSG00000019850/ENSMUSG00000003031/ENSMUSG00000052934/ENSMUSG00000006585/ENSMUSG00000033596/ENSMUSG00000043733/ENSMUSG00000038379/ENSMUSG00000027510/…	204
GO:0042542	response to hydrogen peroxide	72/7747	107/16212	0.672897	1.40816	4.05228	3.44261e-05	0.000919712	0.000650722	ENSMUSG00000031616/ENSMUSG00000030249/ENSMUSG00000019850/ENSMUSG00000071369/ENSMUSG00000024620/ENSMUSG00000021215/ENSMUSG00000003849/ENSMUSG00000021032/ENSMUSG00000006818/ENSMUSG00000057329/ENSMUSG00000003032/ENSMUSG00000035960/ENSMUSG00000059363/ENSMUSG00000026822/ENSMUSG00000061878/ENSMUSG00000020715/ENSMUSG00000000409/ENSMUSG00000021868/ENSMUSG00000001034/ENSMUSG00000027782/ENSMUSG00000001506/…	72
GO:1903076	regulation of protein localization to plasma membrane	76/7747	114/16212	0.666667	1.39512	4.04999	3.46493e-05	0.0009217	0.000652129	ENSMUSG00000051355/ENSMUSG00000020315/ENSMUSG00000045658/ENSMUSG00000001729/ENSMUSG00000021057/ENSMUSG00000019998/ENSMUSG00000024617/ENSMUSG00000045962/ENSMUSG00000031823/ENSMUSG00000024247/ENSMUSG00000024143/ENSMUSG00000052397/ENSMUSG00000006740/ENSMUSG00000035247/ENSMUSG00000052504/ENSMUSG00000038976/ENSMUSG00000001507/ENSMUSG00000026413/ENSMUSG00000079037/ENSMUSG00000032290/ENSMUSG00000035112/…	76
GO:0030705	cytoskeleton-dependent intracellular transport	119/7747	191/16212	0.623037	1.30382	4.04057	3.48203e-05	0.000922292	0.000652548	ENSMUSG00000014602/ENSMUSG00000020149/ENSMUSG00000032536/ENSMUSG00000037161/ENSMUSG00000018395/ENSMUSG00000021288/ENSMUSG00000018707/ENSMUSG00000021076/ENSMUSG00000021109/ENSMUSG00000028576/ENSMUSG00000043991/ENSMUSG00000029469/ENSMUSG00000042992/ENSMUSG00000000738/ENSMUSG00000031921/ENSMUSG00000032258/ENSMUSG00000024253/ENSMUSG00000036591/ENSMUSG00000006740/ENSMUSG00000069601/ENSMUSG00000020132/…	119
GO:0030516	regulation of axon extension	65/7747	95/16212	0.684211	1.43183	4.03827	3.67765e-05	0.000961627	0.000680379	ENSMUSG00000022812/ENSMUSG00000020458/ENSMUSG00000004788/ENSMUSG00000025810/ENSMUSG00000027859/ENSMUSG00000020476/ENSMUSG00000020132/ENSMUSG00000067336/ENSMUSG00000059363/ENSMUSG00000025020/ENSMUSG00000018820/ENSMUSG00000026965/ENSMUSG00000029765/ENSMUSG00000023951/ENSMUSG00000015605/ENSMUSG00000032547/ENSMUSG00000020389/ENSMUSG00000036634/ENSMUSG00000042557/ENSMUSG00000038299/ENSMUSG00000031398/…	65
GO:0060021	roof of mouth development	65/7747	95/16212	0.684211	1.43183	4.03827	3.67765e-05	0.000961627	0.000680379	ENSMUSG00000044674/ENSMUSG00000005583/ENSMUSG00000045680/ENSMUSG00000030201/ENSMUSG00000035569/ENSMUSG00000021253/ENSMUSG00000024247/ENSMUSG00000018604/ENSMUSG00000019947/ENSMUSG00000022483/ENSMUSG00000038122/ENSMUSG00000028333/ENSMUSG00000070990/ENSMUSG00000034640/ENSMUSG00000048450/ENSMUSG00000002799/ENSMUSG00000029755/ENSMUSG00000020097/ENSMUSG00000044177/ENSMUSG00000024330/ENSMUSG00000007613/…	65
GO:1903320	regulation of protein modification by small protein conjugation or removal	138/7747	226/16212	0.610619	1.27783	4.02369	3.69152e-05	0.000961627	0.000680379	ENSMUSG00000049502/ENSMUSG00000022812/ENSMUSG00000051355/ENSMUSG00000006932/ENSMUSG00000036990/ENSMUSG00000001729/ENSMUSG00000021270/ENSMUSG00000055884/ENSMUSG00000021109/ENSMUSG00000074794/ENSMUSG00000019850/ENSMUSG00000028577/ENSMUSG00000024454/ENSMUSG00000024425/ENSMUSG00000057719/ENSMUSG00000024101/ENSMUSG00000045962/ENSMUSG00000001472/ENSMUSG00000019969/ENSMUSG00000024140/ENSMUSG00000022674/…	138
GO:0034504	protein localization to nucleus	181/7747	306/16212	0.591503	1.23783	4.01792	3.6926e-05	0.000961627	0.000680379	ENSMUSG00000049502/ENSMUSG00000022905/ENSMUSG00000022812/ENSMUSG00000020290/ENSMUSG00000028078/ENSMUSG00000001729/ENSMUSG00000007411/ENSMUSG00000021270/ENSMUSG00000051367/ENSMUSG00000021057/ENSMUSG00000027356/ENSMUSG00000026778/ENSMUSG00000006850/ENSMUSG00000024454/ENSMUSG00000024604/ENSMUSG00000041477/ENSMUSG00000025316/ENSMUSG00000019969/ENSMUSG00000028291/ENSMUSG00000031668/ENSMUSG00000049553/…	181
GO:0019432	triglyceride biosynthetic process	35/7747	45/16212	0.777778	1.62764	4.0333	3.70926e-05	0.000961924	0.000680589	ENSMUSG00000037936/ENSMUSG00000027513/ENSMUSG00000020538/ENSMUSG00000020593/ENSMUSG00000028655/ENSMUSG00000002108/ENSMUSG00000018796/ENSMUSG00000018559/ENSMUSG00000031808/ENSMUSG00000029314/ENSMUSG00000030747/ENSMUSG00000052396/ENSMUSG00000020063/ENSMUSG00000023070/ENSMUSG00000024042/ENSMUSG00000012187/ENSMUSG00000036810/ENSMUSG00000026922/ENSMUSG00000021072/ENSMUSG00000031545/ENSMUSG00000015568/…	35
GO:0007224	smoothened signaling pathway	99/7747	155/16212	0.63871	1.33662	4.02834	3.72577e-05	0.000962179	0.000680769	ENSMUSG00000022687/ENSMUSG00000049904/ENSMUSG00000064325/ENSMUSG00000018395/ENSMUSG00000034601/ENSMUSG00000032640/ENSMUSG00000029469/ENSMUSG00000054008/ENSMUSG00000038593/ENSMUSG00000042812/ENSMUSG00000008730/ENSMUSG00000021466/ENSMUSG00000021464/ENSMUSG00000061436/ENSMUSG00000056832/ENSMUSG00000022105/ENSMUSG00000039153/ENSMUSG00000038122/ENSMUSG00000024118/ENSMUSG00000042258/ENSMUSG00000021782/…	99
GO:0021537	telencephalon development	166/7747	278/16212	0.597122	1.24959	4.0155	3.75894e-05	0.000966719	0.000683982	ENSMUSG00000022812/ENSMUSG00000020283/ENSMUSG00000020458/ENSMUSG00000006932/ENSMUSG00000028078/ENSMUSG00000037161/ENSMUSG00000027737/ENSMUSG00000018395/ENSMUSG00000044894/ENSMUSG00000021294/ENSMUSG00000048251/ENSMUSG00000021109/ENSMUSG00000027358/ENSMUSG00000032846/ENSMUSG00000069171/ENSMUSG00000029475/ENSMUSG00000015134/ENSMUSG00000024346/ENSMUSG00000024621/ENSMUSG00000038593/ENSMUSG00000030329/…	166
GO:0030833	regulation of actin filament polymerization	81/7747	123/16212	0.658537	1.37811	4.02681	3.80991e-05	0.000975777	0.000690391	ENSMUSG00000020315/ENSMUSG00000021262/ENSMUSG00000000915/ENSMUSG00000021061/ENSMUSG00000039031/ENSMUSG00000038524/ENSMUSG00000029465/ENSMUSG00000024101/ENSMUSG00000031827/ENSMUSG00000002365/ENSMUSG00000024236/ENSMUSG00000020476/ENSMUSG00000056737/ENSMUSG00000002812/ENSMUSG00000032702/ENSMUSG00000029840/ENSMUSG00000042121/ENSMUSG00000041598/ENSMUSG00000059923/ENSMUSG00000027274/ENSMUSG00000032475/…	81
GO:0035051	cardiocyte differentiation	115/7747	184/16212	0.625	1.30793	4.01859	3.83344e-05	0.000977764	0.000691796	ENSMUSG00000027770/ENSMUSG00000022812/ENSMUSG00000020160/ENSMUSG00000006932/ENSMUSG00000031616/ENSMUSG00000027358/ENSMUSG00000021944/ENSMUSG00000030247/ENSMUSG00000005583/ENSMUSG00000039910/ENSMUSG00000066406/ENSMUSG00000030557/ENSMUSG00000024454/ENSMUSG00000024431/ENSMUSG00000024620/ENSMUSG00000032419/ENSMUSG00000008999/ENSMUSG00000018604/ENSMUSG00000052920/ENSMUSG00000041075/ENSMUSG00000036023/…	115
GO:0007034	vacuolar transport	95/7747	148/16212	0.641892	1.34327	4.01333	3.98448e-05	0.00100799	0.000713184	ENSMUSG00000049502/ENSMUSG00000020128/ENSMUSG00000026718/ENSMUSG00000032536/ENSMUSG00000066278/ENSMUSG00000037526/ENSMUSG00000029434/ENSMUSG00000019998/ENSMUSG00000028300/ENSMUSG00000024425/ENSMUSG00000029462/ENSMUSG00000031731/ENSMUSG00000024107/ENSMUSG00000023830/ENSMUSG00000068747/ENSMUSG00000053119/ENSMUSG00000009907/ENSMUSG00000031447/ENSMUSG00000038039/ENSMUSG00000024480/ENSMUSG00000056234/…	95
GO:0036294	cellular response to decreased oxygen levels	95/7747	148/16212	0.641892	1.34327	4.01333	3.98448e-05	0.00100799	0.000713184	ENSMUSG00000051980/ENSMUSG00000051355/ENSMUSG00000020458/ENSMUSG00000037161/ENSMUSG00000001729/ENSMUSG00000079055/ENSMUSG00000021109/ENSMUSG00000039910/ENSMUSG00000003031/ENSMUSG00000021032/ENSMUSG00000027513/ENSMUSG00000024140/ENSMUSG00000071984/ENSMUSG00000057329/ENSMUSG00000022789/ENSMUSG00000029524/ENSMUSG00000026646/ENSMUSG00000023942/ENSMUSG00000023951/ENSMUSG00000005836/ENSMUSG00000022061/…	95
GO:0043603	amide metabolic process	241/7747	420/16212	0.57381	1.2008	3.98868	4.07339e-05	0.00102289	0.000723722	ENSMUSG00000022793/ENSMUSG00000020458/ENSMUSG00000020309/ENSMUSG00000003418/ENSMUSG00000003623/ENSMUSG00000027737/ENSMUSG00000020402/ENSMUSG00000021263/ENSMUSG00000021087/ENSMUSG00000026317/ENSMUSG00000030282/ENSMUSG00000021696/ENSMUSG00000021587/ENSMUSG00000020009/ENSMUSG00000037440/ENSMUSG00000025789/ENSMUSG00000030513/ENSMUSG00000029468/ENSMUSG00000052102/ENSMUSG00000024487/ENSMUSG00000000594/…	241
GO:0007519	skeletal muscle tissue development	116/7747	186/16212	0.623656	1.30511	4.00371	4.07872e-05	0.00102289	0.000723722	ENSMUSG00000027763/ENSMUSG00000020128/ENSMUSG00000006932/ENSMUSG00000051367/ENSMUSG00000027346/ENSMUSG00000021944/ENSMUSG00000030249/ENSMUSG00000030265/ENSMUSG00000005583/ENSMUSG00000039910/ENSMUSG00000045680/ENSMUSG00000030189/ENSMUSG00000034998/ENSMUSG00000024236/ENSMUSG00000038418/ENSMUSG00000055027/ENSMUSG00000073002/ENSMUSG00000037868/ENSMUSG00000057329/ENSMUSG00000025013/ENSMUSG00000025172/…	116
GO:0045669	positive regulation of osteoblast differentiation	49/7747	68/16212	0.720588	1.50796	4.01548	4.09287e-05	0.00102289	0.000723722	ENSMUSG00000022510/ENSMUSG00000044674/ENSMUSG00000006932/ENSMUSG00000031681/ENSMUSG00000027358/ENSMUSG00000005583/ENSMUSG00000032265/ENSMUSG00000027523/ENSMUSG00000008999/ENSMUSG00000067336/ENSMUSG00000054675/ENSMUSG00000039153/ENSMUSG00000023951/ENSMUSG00000027276/ENSMUSG00000040289/ENSMUSG00000021756/ENSMUSG00000021540/ENSMUSG00000029755/ENSMUSG00000052430/ENSMUSG00000026674/ENSMUSG00000053110/…	49
GO:0007033	vacuole organization	128/7747	208/16212	0.615385	1.2878	3.99643	4.16872e-05	0.00103766	0.000734174	ENSMUSG00000026280/ENSMUSG00000020149/ENSMUSG00000020128/ENSMUSG00000028080/ENSMUSG00000035992/ENSMUSG00000037526/ENSMUSG00000029434/ENSMUSG00000026317/ENSMUSG00000028300/ENSMUSG00000029468/ENSMUSG00000029467/ENSMUSG00000030161/ENSMUSG00000031950/ENSMUSG00000019969/ENSMUSG00000026737/ENSMUSG00000040412/ENSMUSG00000053119/ENSMUSG00000009907/ENSMUSG00000022125/ENSMUSG00000031447/ENSMUSG00000049323/…	128
GO:0045727	positive regulation of translation	82/7747	125/16212	0.656	1.3728	4.00267	4.21797e-05	0.00104359	0.000738369	ENSMUSG00000027770/ENSMUSG00000025962/ENSMUSG00000032423/ENSMUSG00000068823/ENSMUSG00000022283/ENSMUSG00000038398/ENSMUSG00000038848/ENSMUSG00000073565/ENSMUSG00000028790/ENSMUSG00000032475/ENSMUSG00000040550/ENSMUSG00000028639/ENSMUSG00000042426/ENSMUSG00000032294/ENSMUSG00000037331/ENSMUSG00000026413/ENSMUSG00000035557/ENSMUSG00000063065/ENSMUSG00000078812/ENSMUSG00000018765/ENSMUSG00000038762/…	82
GO:0150115	cell-substrate junction organization	66/7747	97/16212	0.680412	1.42389	4.0057	4.22622e-05	0.00104359	0.000738369	ENSMUSG00000033149/ENSMUSG00000043733/ENSMUSG00000024277/ENSMUSG00000025810/ENSMUSG00000057329/ENSMUSG00000019920/ENSMUSG00000004530/ENSMUSG00000031480/ENSMUSG00000062352/ENSMUSG00000020758/ENSMUSG00000023951/ENSMUSG00000040690/ENSMUSG00000025314/ENSMUSG00000052504/ENSMUSG00000024421/ENSMUSG00000021823/ENSMUSG00000031342/ENSMUSG00000031355/ENSMUSG00000059981/ENSMUSG00000000555/ENSMUSG00000000530/…	66
GO:0090630	activation of GTPase activity	33/7747	42/16212	0.785714	1.64425	3.99928	4.28957e-05	0.00105503	0.000746463	ENSMUSG00000049107/ENSMUSG00000042700/ENSMUSG00000033763/ENSMUSG00000004530/ENSMUSG00000029032/ENSMUSG00000018736/ENSMUSG00000050730/ENSMUSG00000027652/ENSMUSG00000073982/ENSMUSG00000029859/ENSMUSG00000057315/ENSMUSG00000023800/ENSMUSG00000017631/ENSMUSG00000028126/ENSMUSG00000002489/ENSMUSG00000039844/ENSMUSG00000026812/ENSMUSG00000021027/ENSMUSG00000037110/ENSMUSG00000021365/ENSMUSG00000021368/…	33
GO:0006887	exocytosis	204/7747	350/16212	0.582857	1.21973	3.97567	4.36166e-05	0.00106852	0.000756009	ENSMUSG00000027765/ENSMUSG00000022829/ENSMUSG00000026718/ENSMUSG00000015653/ENSMUSG00000021281/ENSMUSG00000021062/ENSMUSG00000028300/ENSMUSG00000053025/ENSMUSG00000029468/ENSMUSG00000029467/ENSMUSG00000024617/ENSMUSG00000030337/ENSMUSG00000024101/ENSMUSG00000030172/ENSMUSG00000051586/ENSMUSG00000042812/ENSMUSG00000031731/ENSMUSG00000029608/ENSMUSG00000021248/ENSMUSG00000019969/ENSMUSG00000024127/…	204
GO:0048592	eye morphogenesis	107/7747	170/16212	0.629412	1.31716	3.97676	4.60068e-05	0.00111504	0.000788922	ENSMUSG00000022656/ENSMUSG00000020160/ENSMUSG00000020467/ENSMUSG00000006932/ENSMUSG00000021109/ENSMUSG00000039910/ENSMUSG00000029475/ENSMUSG00000015134/ENSMUSG00000030201/ENSMUSG00000008999/ENSMUSG00000024238/ENSMUSG00000008730/ENSMUSG00000026782/ENSMUSG00000057329/ENSMUSG00000031450/ENSMUSG00000008435/ENSMUSG00000045493/ENSMUSG00000061436/ENSMUSG00000029838/ENSMUSG00000028023/ENSMUSG00000041592/…	107
GO:0007517	muscle organ development	197/7747	337/16212	0.58457	1.22332	3.96315	4.60903e-05	0.00111504	0.000788922	ENSMUSG00000025958/ENSMUSG00000027763/ENSMUSG00000022687/ENSMUSG00000020128/ENSMUSG00000044674/ENSMUSG00000006932/ENSMUSG00000031616/ENSMUSG00000051367/ENSMUSG00000027966/ENSMUSG00000027358/ENSMUSG00000027346/ENSMUSG00000021944/ENSMUSG00000030249/ENSMUSG00000030265/ENSMUSG00000005583/ENSMUSG00000039910/ENSMUSG00000045680/ENSMUSG00000078671/ENSMUSG00000030201/ENSMUSG00000030189/ENSMUSG00000034998/…	197
GO:0042063	gliogenesis	216/7747	373/16212	0.579088	1.21185	3.95979	4.6367e-05	0.00111504	0.000788922	ENSMUSG00000025958/ENSMUSG00000026278/ENSMUSG00000027765/ENSMUSG00000020128/ENSMUSG00000020467/ENSMUSG00000020458/ENSMUSG00000026728/ENSMUSG00000040537/ENSMUSG00000040274/ENSMUSG00000006932/ENSMUSG00000029388/ENSMUSG00000001729/ENSMUSG00000079055/ENSMUSG00000027358/ENSMUSG00000030265/ENSMUSG00000026773/ENSMUSG00000020009/ENSMUSG00000019982/ENSMUSG00000029470/ENSMUSG00000024431/ENSMUSG00000024621/…	216
GO:0035264	multicellular organism growth	124/7747	201/16212	0.616915	1.29101	3.97147	4.6415e-05	0.00111504	0.000788922	ENSMUSG00000025958/ENSMUSG00000024454/ENSMUSG00000005069/ENSMUSG00000042605/ENSMUSG00000035569/ENSMUSG00000043733/ENSMUSG00000027523/ENSMUSG00000024247/ENSMUSG00000052397/ENSMUSG00000014599/ENSMUSG00000019947/ENSMUSG00000057329/ENSMUSG00000021466/ENSMUSG00000062115/ENSMUSG00000024897/ENSMUSG00000059363/ENSMUSG00000054051/ENSMUSG00000041147/ENSMUSG00000020782/ENSMUSG00000060743/ENSMUSG00000027274/…	124
GO:0050679	positive regulation of epithelial cell proliferation	124/7747	201/16212	0.616915	1.29101	3.97147	4.6415e-05	0.00111504	0.000788922	ENSMUSG00000022510/ENSMUSG00000020458/ENSMUSG00000006932/ENSMUSG00000018395/ENSMUSG00000001729/ENSMUSG00000030283/ENSMUSG00000019850/ENSMUSG00000036585/ENSMUSG00000006519/ENSMUSG00000061048/ENSMUSG00000004791/ENSMUSG00000032419/ENSMUSG00000055817/ENSMUSG00000033960/ENSMUSG00000038894/ENSMUSG00000028413/ENSMUSG00000041075/ENSMUSG00000039059/ENSMUSG00000078202/ENSMUSG00000029838/ENSMUSG00000026031/…	124
GO:0033002	muscle cell proliferation	157/7747	262/16212	0.599237	1.25401	3.96535	4.6602e-05	0.00111521	0.000789042	ENSMUSG00000022905/ENSMUSG00000022812/ENSMUSG00000038845/ENSMUSG00000006932/ENSMUSG00000031616/ENSMUSG00000031681/ENSMUSG00000031712/ENSMUSG00000001729/ENSMUSG00000051367/ENSMUSG00000021109/ENSMUSG00000027358/ENSMUSG00000021944/ENSMUSG00000005583/ENSMUSG00000039910/ENSMUSG00000019850/ENSMUSG00000071369/ENSMUSG00000019982/ENSMUSG00000024486/ENSMUSG00000036585/ENSMUSG00000024620/ENSMUSG00000003031/…	157
GO:0008344	adult locomotory behavior	67/7747	99/16212	0.676768	1.41626	3.97421	4.82768e-05	0.00115085	0.000814256	ENSMUSG00000022523/ENSMUSG00000040537/ENSMUSG00000026317/ENSMUSG00000000263/ENSMUSG00000027859/ENSMUSG00000040389/ENSMUSG00000022111/ENSMUSG00000042372/ENSMUSG00000059363/ENSMUSG00000017412/ENSMUSG00000026959/ENSMUSG00000061436/ENSMUSG00000020644/ENSMUSG00000043207/ENSMUSG00000028657/ENSMUSG00000028580/ENSMUSG00000024413/ENSMUSG00000028328/ENSMUSG00000021764/ENSMUSG00000063142/ENSMUSG00000012819/…	67
GO:0032006	regulation of TOR signaling	88/7747	136/16212	0.647059	1.35409	3.96688	4.87734e-05	0.00115823	0.000819479	ENSMUSG00000022812/ENSMUSG00000035992/ENSMUSG00000001729/ENSMUSG00000021109/ENSMUSG00000028300/ENSMUSG00000024454/ENSMUSG00000024493/ENSMUSG00000024576/ENSMUSG00000001518/ENSMUSG00000031959/ENSMUSG00000028278/ENSMUSG00000024283/ENSMUSG00000019927/ENSMUSG00000047496/ENSMUSG00000031444/ENSMUSG00000031451/ENSMUSG00000049323/ENSMUSG00000035953/ENSMUSG00000021457/ENSMUSG00000001366/ENSMUSG00000027579/…	88
GO:0045787	positive regulation of cell cycle	191/7747	326/16212	0.58589	1.22608	3.94477	4.98741e-05	0.00117645	0.000832375	ENSMUSG00000022510/ENSMUSG00000001729/ENSMUSG00000018707/ENSMUSG00000059970/ENSMUSG00000033373/ENSMUSG00000021944/ENSMUSG00000039910/ENSMUSG00000019997/ENSMUSG00000029472/ENSMUSG00000029466/ENSMUSG00000024621/ENSMUSG00000024620/ENSMUSG00000030201/ENSMUSG00000030346/ENSMUSG00000035842/ENSMUSG00000045962/ENSMUSG00000043733/ENSMUSG00000028284/ENSMUSG00000027524/ENSMUSG00000055817/ENSMUSG00000024236/…	191
GO:0010508	positive regulation of autophagy	93/7747	145/16212	0.641379	1.3422	3.95966	5.00351e-05	0.00117645	0.000832375	ENSMUSG00000022812/ENSMUSG00000020402/ENSMUSG00000021109/ENSMUSG00000050473/ENSMUSG00000028300/ENSMUSG00000024442/ENSMUSG00000004446/ENSMUSG00000028284/ENSMUSG00000032741/ENSMUSG00000026737/ENSMUSG00000024283/ENSMUSG00000024286/ENSMUSG00000000001/ENSMUSG00000040412/ENSMUSG00000047496/ENSMUSG00000041548/ENSMUSG00000049323/ENSMUSG00000026672/ENSMUSG00000035235/ENSMUSG00000054517/ENSMUSG00000023990/…	93
GO:0071897	DNA biosynthetic process	103/7747	163/16212	0.631902	1.32237	3.95714	5.01103e-05	0.00117645	0.000832375	ENSMUSG00000032409/ENSMUSG00000026283/ENSMUSG00000034206/ENSMUSG00000022812/ENSMUSG00000038845/ENSMUSG00000007739/ENSMUSG00000006932/ENSMUSG00000020380/ENSMUSG00000021270/ENSMUSG00000033454/ENSMUSG00000026778/ENSMUSG00000019997/ENSMUSG00000024620/ENSMUSG00000030330/ENSMUSG00000031921/ENSMUSG00000014426/ENSMUSG00000027855/ENSMUSG00000020474/ENSMUSG00000029363/ENSMUSG00000049717/ENSMUSG00000038482/…	103
GO:0051058	negative regulation of small GTPase mediated signal transduction	47/7747	65/16212	0.723077	1.51317	3.96579	5.07713e-05	0.00118747	0.000840171	ENSMUSG00000022508/ENSMUSG00000024427/ENSMUSG00000029602/ENSMUSG00000041225/ENSMUSG00000022114/ENSMUSG00000031453/ENSMUSG00000069805/ENSMUSG00000032702/ENSMUSG00000063506/ENSMUSG00000027581/ENSMUSG00000006906/ENSMUSG00000061665/ENSMUSG00000040479/ENSMUSG00000001507/ENSMUSG00000039831/ENSMUSG00000030685/ENSMUSG00000067629/ENSMUSG00000050730/ENSMUSG00000036246/ENSMUSG00000057315/ENSMUSG00000025340/…	47
GO:0045732	positive regulation of protein catabolic process	115/7747	185/16212	0.621622	1.30086	3.9371	5.39214e-05	0.00125641	0.000888945	ENSMUSG00000026280/ENSMUSG00000022812/ENSMUSG00000028082/ENSMUSG00000001729/ENSMUSG00000021270/ENSMUSG00000044548/ENSMUSG00000019850/ENSMUSG00000070509/ENSMUSG00000024425/ENSMUSG00000057719/ENSMUSG00000024576/ENSMUSG00000003031/ENSMUSG00000019969/ENSMUSG00000037104/ENSMUSG00000005371/ENSMUSG00000002365/ENSMUSG00000052397/ENSMUSG00000022674/ENSMUSG00000031668/ENSMUSG00000032867/ENSMUSG00000032350/…	115
GO:0071772	response to BMP	99/7747	156/16212	0.634615	1.32805	3.93857	5.43318e-05	0.00125652	0.000889026	ENSMUSG00000022816/ENSMUSG00000044674/ENSMUSG00000031681/ENSMUSG00000021096/ENSMUSG00000027358/ENSMUSG00000021944/ENSMUSG00000070509/ENSMUSG00000008999/ENSMUSG00000038418/ENSMUSG00000033014/ENSMUSG00000022483/ENSMUSG00000067336/ENSMUSG00000021464/ENSMUSG00000036580/ENSMUSG00000056004/ENSMUSG00000061436/ENSMUSG00000020802/ENSMUSG00000039153/ENSMUSG00000032744/ENSMUSG00000005836/ENSMUSG00000042377/…	99
GO:0071773	cellular response to BMP stimulus	99/7747	156/16212	0.634615	1.32805	3.93857	5.43318e-05	0.00125652	0.000889026	ENSMUSG00000022816/ENSMUSG00000044674/ENSMUSG00000031681/ENSMUSG00000021096/ENSMUSG00000027358/ENSMUSG00000021944/ENSMUSG00000070509/ENSMUSG00000008999/ENSMUSG00000038418/ENSMUSG00000033014/ENSMUSG00000022483/ENSMUSG00000067336/ENSMUSG00000021464/ENSMUSG00000036580/ENSMUSG00000056004/ENSMUSG00000061436/ENSMUSG00000020802/ENSMUSG00000039153/ENSMUSG00000032744/ENSMUSG00000005836/ENSMUSG00000042377/…	99
GO:0043410	positive regulation of MAPK cascade	257/7747	452/16212	0.568584	1.18987	3.91647	5.46487e-05	0.00125746	0.000889689	ENSMUSG00000026277/ENSMUSG00000027765/ENSMUSG00000051980/ENSMUSG00000038845/ENSMUSG00000006932/ENSMUSG00000031616/ENSMUSG00000031714/ENSMUSG00000021846/ENSMUSG00000027358/ENSMUSG00000005583/ENSMUSG00000071369/ENSMUSG00000019997/ENSMUSG00000029468/ENSMUSG00000036585/ENSMUSG00000057719/ENSMUSG00000024621/ENSMUSG00000024620/ENSMUSG00000054008/ENSMUSG00000049107/ENSMUSG00000030339/ENSMUSG00000030336/…	257
GO:1901873	regulation of post-translational protein modification	140/7747	231/16212	0.606061	1.26829	3.92888	5.4778e-05	0.00125746	0.000889689	ENSMUSG00000049502/ENSMUSG00000022812/ENSMUSG00000051355/ENSMUSG00000006932/ENSMUSG00000036990/ENSMUSG00000001729/ENSMUSG00000021270/ENSMUSG00000055884/ENSMUSG00000021109/ENSMUSG00000074794/ENSMUSG00000019850/ENSMUSG00000028577/ENSMUSG00000024454/ENSMUSG00000024425/ENSMUSG00000057719/ENSMUSG00000024101/ENSMUSG00000045962/ENSMUSG00000001472/ENSMUSG00000019969/ENSMUSG00000024140/ENSMUSG00000022674/…	140
GO:0048546	digestive tract morphogenesis	39/7747	52/16212	0.75	1.56951	3.93497	5.78712e-05	0.00132356	0.000936459	ENSMUSG00000022510/ENSMUSG00000006932/ENSMUSG00000044548/ENSMUSG00000021109/ENSMUSG00000021944/ENSMUSG00000045680/ENSMUSG00000042812/ENSMUSG00000057329/ENSMUSG00000018822/ENSMUSG00000020644/ENSMUSG00000028023/ENSMUSG00000023991/ENSMUSG00000039377/ENSMUSG00000032327/ENSMUSG00000027996/ENSMUSG00000037171/ENSMUSG00000005958/ENSMUSG00000020679/ENSMUSG00000028469/ENSMUSG00000026923/ENSMUSG00000024563/…	39
GO:0043523	regulation of neuron apoptotic process	171/7747	289/16212	0.591696	1.23823	3.90923	5.8315e-05	0.00132881	0.000940171	ENSMUSG00000026278/ENSMUSG00000022812/ENSMUSG00000038845/ENSMUSG00000020128/ENSMUSG00000044674/ENSMUSG00000006932/ENSMUSG00000027993/ENSMUSG00000051367/ENSMUSG00000021109/ENSMUSG00000026317/ENSMUSG00000030265/ENSMUSG00000005583/ENSMUSG00000019982/ENSMUSG00000029475/ENSMUSG00000025789/ENSMUSG00000024454/ENSMUSG00000024431/ENSMUSG00000024500/ENSMUSG00000049107/ENSMUSG00000003849/ENSMUSG00000079036/…	171
GO:0006470	protein dephosphorylation	81/7747	124/16212	0.653226	1.36699	3.92443	5.8646e-05	0.00133146	0.000942045	ENSMUSG00000026309/ENSMUSG00000020463/ENSMUSG00000017843/ENSMUSG00000021096/ENSMUSG00000021051/ENSMUSG00000038582/ENSMUSG00000004455/ENSMUSG00000004266/ENSMUSG00000043733/ENSMUSG00000028274/ENSMUSG00000061130/ENSMUSG00000002228/ENSMUSG00000062127/ENSMUSG00000057329/ENSMUSG00000020154/ENSMUSG00000036504/ENSMUSG00000042121/ENSMUSG00000030002/ENSMUSG00000059409/ENSMUSG00000025314/ENSMUSG00000041846/…	81
GO:0032271	regulation of protein polymerization	111/7747	178/16212	0.623596	1.30499	3.91406	5.95047e-05	0.00134306	0.000950252	ENSMUSG00000020315/ENSMUSG00000021270/ENSMUSG00000021262/ENSMUSG00000000915/ENSMUSG00000021061/ENSMUSG00000049550/ENSMUSG00000019970/ENSMUSG00000039031/ENSMUSG00000038524/ENSMUSG00000029465/ENSMUSG00000003031/ENSMUSG00000030357/ENSMUSG00000024101/ENSMUSG00000031827/ENSMUSG00000002365/ENSMUSG00000024236/ENSMUSG00000068744/ENSMUSG00000020476/ENSMUSG00000056737/ENSMUSG00000055717/ENSMUSG00000002812/…	111
GO:0046580	negative regulation of Ras protein signal transduction	21/7747	24/16212	0.875	1.8311	3.89779	5.95904e-05	0.00134306	0.000950252	ENSMUSG00000024427/ENSMUSG00000029602/ENSMUSG00000022114/ENSMUSG00000031453/ENSMUSG00000069805/ENSMUSG00000006906/ENSMUSG00000040479/ENSMUSG00000067629/ENSMUSG00000025340/ENSMUSG00000020716/ENSMUSG00000039844/ENSMUSG00000017466/ENSMUSG00000037211/ENSMUSG00000009630/ENSMUSG00000028664/ENSMUSG00000029020/ENSMUSG00000052142/ENSMUSG00000036913/ENSMUSG00000038696/ENSMUSG00000026883/ENSMUSG00000039239	21
GO:1904377	positive regulation of protein localization to cell periphery	51/7747	72/16212	0.708333	1.48232	3.92378	6.06316e-05	0.00136157	0.000963353	ENSMUSG00000051355/ENSMUSG00000020315/ENSMUSG00000001729/ENSMUSG00000021057/ENSMUSG00000019978/ENSMUSG00000052397/ENSMUSG00000006740/ENSMUSG00000027883/ENSMUSG00000052504/ENSMUSG00000038976/ENSMUSG00000001507/ENSMUSG00000026413/ENSMUSG00000079037/ENSMUSG00000032290/ENSMUSG00000029032/ENSMUSG00000020372/ENSMUSG00000036968/ENSMUSG00000066306/ENSMUSG00000073982/ENSMUSG00000028906/ENSMUSG00000049493/…	51
GO:0032365	intracellular lipid transport	34/7747	44/16212	0.772727	1.61707	3.92096	6.10086e-05	0.0013651	0.000965845	ENSMUSG00000036292/ENSMUSG00000020128/ENSMUSG00000021054/ENSMUSG00000030201/ENSMUSG00000021240/ENSMUSG00000026737/ENSMUSG00000026319/ENSMUSG00000039050/ENSMUSG00000026944/ENSMUSG00000024319/ENSMUSG00000028773/ENSMUSG00000024413/ENSMUSG00000024378/ENSMUSG00000028127/ENSMUSG00000002308/ENSMUSG00000017288/ENSMUSG00000037278/ENSMUSG00000024030/ENSMUSG00000015243/ENSMUSG00000031574/ENSMUSG00000023068/…	34
GO:0097479	synaptic vesicle localization	42/7747	57/16212	0.736842	1.54198	3.92123	6.14997e-05	0.00137113	0.000970117	ENSMUSG00000014602/ENSMUSG00000006932/ENSMUSG00000042992/ENSMUSG00000033419/ENSMUSG00000006740/ENSMUSG00000024480/ENSMUSG00000040687/ENSMUSG00000021824/ENSMUSG00000031367/ENSMUSG00000027341/ENSMUSG00000018566/ENSMUSG00000051790/ENSMUSG00000024304/ENSMUSG00000031302/ENSMUSG00000035566/ENSMUSG00000003872/ENSMUSG00000036273/ENSMUSG00000022973/ENSMUSG00000061601/ENSMUSG00000026825/ENSMUSG00000026849/…	42
GO:0034599	cellular response to oxidative stress	143/7747	237/16212	0.603376	1.26267	3.89697	6.23394e-05	0.00138252	0.000978169	ENSMUSG00000026277/ENSMUSG00000020283/ENSMUSG00000064090/ENSMUSG00000020464/ENSMUSG00000031616/ENSMUSG00000027737/ENSMUSG00000001729/ENSMUSG00000021109/ENSMUSG00000041671/ENSMUSG00000019850/ENSMUSG00000071369/ENSMUSG00000075701/ENSMUSG00000029467/ENSMUSG00000033871/ENSMUSG00000024620/ENSMUSG00000005069/ENSMUSG00000030166/ENSMUSG00000021215/ENSMUSG00000034105/ENSMUSG00000003849/ENSMUSG00000021032/…	143
GO:0061951	establishment of protein localization to plasma membrane	48/7747	67/16212	0.716418	1.49923	3.91725	6.24563e-05	0.00138252	0.000978169	ENSMUSG00000022656/ENSMUSG00000051355/ENSMUSG00000020315/ENSMUSG00000029392/ENSMUSG00000029401/ENSMUSG00000021057/ENSMUSG00000024101/ENSMUSG00000024247/ENSMUSG00000024127/ENSMUSG00000073002/ENSMUSG00000069601/ENSMUSG00000026672/ENSMUSG00000038671/ENSMUSG00000020740/ENSMUSG00000029126/ENSMUSG00000032312/ENSMUSG00000019087/ENSMUSG00000023043/ENSMUSG00000020372/ENSMUSG00000020894/ENSMUSG00000068036/…	48
GO:0044272	sulfur compound biosynthetic process	91/7747	142/16212	0.640845	1.34108	3.90532	6.28319e-05	0.00138588	0.000980549	ENSMUSG00000022793/ENSMUSG00000006932/ENSMUSG00000031684/ENSMUSG00000027737/ENSMUSG00000020402/ENSMUSG00000021048/ENSMUSG00000021696/ENSMUSG00000032640/ENSMUSG00000054008/ENSMUSG00000041372/ENSMUSG00000031952/ENSMUSG00000032262/ENSMUSG00000031668/ENSMUSG00000033022/ENSMUSG00000062937/ENSMUSG00000032349/ENSMUSG00000032350/ENSMUSG00000042010/ENSMUSG00000043587/ENSMUSG00000041220/ENSMUSG00000020744/…	91
GO:1903828	negative regulation of protein localization	137/7747	226/16212	0.606195	1.26857	3.88959	6.45095e-05	0.00141784	0.00100316	ENSMUSG00000022829/ENSMUSG00000022812/ENSMUSG00000051355/ENSMUSG00000045658/ENSMUSG00000001467/ENSMUSG00000028078/ENSMUSG00000001729/ENSMUSG00000007411/ENSMUSG00000027356/ENSMUSG00000024454/ENSMUSG00000024425/ENSMUSG00000045962/ENSMUSG00000021218/ENSMUSG00000031930/ENSMUSG00000029616/ENSMUSG00000043733/ENSMUSG00000028277/ENSMUSG00000024247/ENSMUSG00000024143/ENSMUSG00000049553/ENSMUSG00000029361/…	137
GO:0040029	epigenetic regulation of gene expression	144/7747	239/16212	0.60251	1.26086	3.88665	6.49853e-05	0.00142325	0.00100699	ENSMUSG00000022508/ENSMUSG00000022812/ENSMUSG00000038845/ENSMUSG00000054003/ENSMUSG00000048118/ENSMUSG00000064138/ENSMUSG00000039089/ENSMUSG00000024454/ENSMUSG00000024431/ENSMUSG00000030213/ENSMUSG00000030180/ENSMUSG00000033799/ENSMUSG00000079036/ENSMUSG00000027523/ENSMUSG00000070495/ENSMUSG00000028640/ENSMUSG00000026739/ENSMUSG00000024240/ENSMUSG00000038418/ENSMUSG00000029423/ENSMUSG00000035960/…	144
GO:0016079	synaptic vesicle exocytosis	74/7747	112/16212	0.660714	1.38266	3.88752	6.88608e-05	0.00150281	0.00106328	ENSMUSG00000027765/ENSMUSG00000022829/ENSMUSG00000053025/ENSMUSG00000029468/ENSMUSG00000029467/ENSMUSG00000024617/ENSMUSG00000030337/ENSMUSG00000030172/ENSMUSG00000029608/ENSMUSG00000019969/ENSMUSG00000024127/ENSMUSG00000022789/ENSMUSG00000029420/ENSMUSG00000017412/ENSMUSG00000039050/ENSMUSG00000004113/ENSMUSG00000032890/ENSMUSG00000027273/ENSMUSG00000041670/ENSMUSG00000026452/ENSMUSG00000039232/…	74
GO:0090132	epithelium migration	66/7747	98/16212	0.673469	1.40936	3.8884	6.92424e-05	0.00150584	0.00106543	ENSMUSG00000020458/ENSMUSG00000026728/ENSMUSG00000021262/ENSMUSG00000021109/ENSMUSG00000027356/ENSMUSG00000024486/ENSMUSG00000055333/ENSMUSG00000001672/ENSMUSG00000043733/ENSMUSG00000024277/ENSMUSG00000038894/ENSMUSG00000067336/ENSMUSG00000032702/ENSMUSG00000071856/ENSMUSG00000004530/ENSMUSG00000026872/ENSMUSG00000028434/ENSMUSG00000001507/ENSMUSG00000058325/ENSMUSG00000061762/ENSMUSG00000026457/…	66
GO:0050678	regulation of epithelial cell proliferation	214/7747	371/16212	0.576819	1.2071	3.8604	6.97671e-05	0.00151195	0.00106975	ENSMUSG00000022510/ENSMUSG00000020458/ENSMUSG00000000600/ENSMUSG00000040274/ENSMUSG00000006932/ENSMUSG00000031616/ENSMUSG00000018395/ENSMUSG00000001729/ENSMUSG00000048251/ENSMUSG00000051367/ENSMUSG00000030283/ENSMUSG00000005583/ENSMUSG00000019850/ENSMUSG00000028576/ENSMUSG00000036585/ENSMUSG00000003031/ENSMUSG00000030201/ENSMUSG00000004446/ENSMUSG00000006519/ENSMUSG00000061048/ENSMUSG00000001672/…	214
GO:0060972	left/right pattern formation	83/7747	128/16212	0.648438	1.35697	3.87884	7.06558e-05	0.00152587	0.0010796	ENSMUSG00000018395/ENSMUSG00000021109/ENSMUSG00000021944/ENSMUSG00000005583/ENSMUSG00000039910/ENSMUSG00000028576/ENSMUSG00000030513/ENSMUSG00000030201/ENSMUSG00000042812/ENSMUSG00000019969/ENSMUSG00000024253/ENSMUSG00000026679/ENSMUSG00000061802/ENSMUSG00000018604/ENSMUSG00000010136/ENSMUSG00000014329/ENSMUSG00000071350/ENSMUSG00000028023/ENSMUSG00000015605/ENSMUSG00000038122/ENSMUSG00000040929/…	83
GO:1905710	positive regulation of membrane permeability	32/7747	41/16212	0.780488	1.63331	3.88418	7.12639e-05	0.00153366	0.00108511	ENSMUSG00000026278/ENSMUSG00000022812/ENSMUSG00000064326/ENSMUSG00000000915/ENSMUSG00000004446/ENSMUSG00000000738/ENSMUSG00000059363/ENSMUSG00000025933/ENSMUSG00000032350/ENSMUSG00000028581/ENSMUSG00000021868/ENSMUSG00000021771/ENSMUSG00000031633/ENSMUSG00000059552/ENSMUSG00000003541/ENSMUSG00000057789/ENSMUSG00000017686/ENSMUSG00000036880/ENSMUSG00000025733/ENSMUSG00000018166/ENSMUSG00000027381/…	32
GO:0048839	inner ear development	133/7747	219/16212	0.607306	1.2709	3.86118	7.26323e-05	0.00155475	0.00110003	ENSMUSG00000026280/ENSMUSG00000005917/ENSMUSG00000026768/ENSMUSG00000018395/ENSMUSG00000051367/ENSMUSG00000027966/ENSMUSG00000027358/ENSMUSG00000015134/ENSMUSG00000024497/ENSMUSG00000003031/ENSMUSG00000043733/ENSMUSG00000032419/ENSMUSG00000024238/ENSMUSG00000018604/ENSMUSG00000026976/ENSMUSG00000022483/ENSMUSG00000022114/ENSMUSG00000021464/ENSMUSG00000048707/ENSMUSG00000001052/ENSMUSG00000020733/…	133
GO:0016241	regulation of macroautophagy	88/7747	137/16212	0.642336	1.3442	3.87043	7.27456e-05	0.00155475	0.00110003	ENSMUSG00000020402/ENSMUSG00000037526/ENSMUSG00000021109/ENSMUSG00000028300/ENSMUSG00000024442/ENSMUSG00000028284/ENSMUSG00000026737/ENSMUSG00000024283/ENSMUSG00000000001/ENSMUSG00000040412/ENSMUSG00000022789/ENSMUSG00000041548/ENSMUSG00000020538/ENSMUSG00000049323/ENSMUSG00000026672/ENSMUSG00000029592/ENSMUSG00000035235/ENSMUSG00000040506/ENSMUSG00000020952/ENSMUSG00000041135/ENSMUSG00000024413/…	88
GO:0001841	neural tube formation	79/7747	121/16212	0.652893	1.3663	3.86893	7.3913e-05	0.00156888	0.00111003	ENSMUSG00000021109/ENSMUSG00000021048/ENSMUSG00000039910/ENSMUSG00000029475/ENSMUSG00000070509/ENSMUSG00000038593/ENSMUSG00000030201/ENSMUSG00000028284/ENSMUSG00000008999/ENSMUSG00000060733/ENSMUSG00000021466/ENSMUSG00000001052/ENSMUSG00000023972/ENSMUSG00000035247/ENSMUSG00000026872/ENSMUSG00000024294/ENSMUSG00000039765/ENSMUSG00000020580/ENSMUSG00000029381/ENSMUSG00000001288/ENSMUSG00000020888/…	79
GO:0048675	axon extension	79/7747	121/16212	0.652893	1.3663	3.86893	7.3913e-05	0.00156888	0.00111003	ENSMUSG00000022812/ENSMUSG00000020458/ENSMUSG00000031616/ENSMUSG00000028300/ENSMUSG00000024497/ENSMUSG00000004788/ENSMUSG00000027524/ENSMUSG00000026014/ENSMUSG00000025810/ENSMUSG00000027859/ENSMUSG00000020476/ENSMUSG00000020132/ENSMUSG00000067336/ENSMUSG00000059363/ENSMUSG00000025020/ENSMUSG00000018820/ENSMUSG00000026965/ENSMUSG00000029765/ENSMUSG00000023951/ENSMUSG00000015605/ENSMUSG00000032547/…	79
GO:0051052	regulation of DNA metabolic process	254/7747	448/16212	0.566964	1.18648	3.829	7.80618e-05	0.00165129	0.00116833	ENSMUSG00000032409/ENSMUSG00000068428/ENSMUSG00000022508/ENSMUSG00000026283/ENSMUSG00000026309/ENSMUSG00000027770/ENSMUSG00000034206/ENSMUSG00000022812/ENSMUSG00000020152/ENSMUSG00000007739/ENSMUSG00000020463/ENSMUSG00000006932/ENSMUSG00000020380/ENSMUSG00000001729/ENSMUSG00000040865/ENSMUSG00000029438/ENSMUSG00000026778/ENSMUSG00000021694/ENSMUSG00000010461/ENSMUSG00000024425/ENSMUSG00000024620/…	254
GO:0090257	regulation of muscle system process	142/7747	236/16212	0.601695	1.25916	3.83655	7.97549e-05	0.00168136	0.00118961	ENSMUSG00000022812/ENSMUSG00000003161/ENSMUSG00000021270/ENSMUSG00000079055/ENSMUSG00000021944/ENSMUSG00000005583/ENSMUSG00000019997/ENSMUSG00000030557/ENSMUSG00000028172/ENSMUSG00000029470/ENSMUSG00000029467/ENSMUSG00000024431/ENSMUSG00000027524/ENSMUSG00000052920/ENSMUSG00000041957/ENSMUSG00000028403/ENSMUSG00000028420/ENSMUSG00000003032/ENSMUSG00000036023/ENSMUSG00000029840/ENSMUSG00000029761/…	142
GO:1902806	regulation of cell cycle G1/S phase transition	105/7747	168/16212	0.625	1.30793	3.83798	8.1637e-05	0.00171521	0.00121356	ENSMUSG00000022510/ENSMUSG00000063275/ENSMUSG00000001729/ENSMUSG00000017843/ENSMUSG00000044548/ENSMUSG00000029438/ENSMUSG00000024621/ENSMUSG00000004266/ENSMUSG00000003031/ENSMUSG00000004446/ENSMUSG00000052934/ENSMUSG00000033596/ENSMUSG00000027510/ENSMUSG00000024283/ENSMUSG00000057329/ENSMUSG00000038482/ENSMUSG00000049285/ENSMUSG00000003032/ENSMUSG00000035960/ENSMUSG00000017412/ENSMUSG00000022105/…	105
GO:0008064	regulation of actin polymerization or depolymerization	90/7747	141/16212	0.638298	1.33575	3.8306	8.53732e-05	0.00178765	0.00126481	ENSMUSG00000020315/ENSMUSG00000021262/ENSMUSG00000000915/ENSMUSG00000021061/ENSMUSG00000039031/ENSMUSG00000038524/ENSMUSG00000029465/ENSMUSG00000024101/ENSMUSG00000031827/ENSMUSG00000040852/ENSMUSG00000002365/ENSMUSG00000024236/ENSMUSG00000020476/ENSMUSG00000056737/ENSMUSG00000002812/ENSMUSG00000032702/ENSMUSG00000029840/ENSMUSG00000042121/ENSMUSG00000015932/ENSMUSG00000041598/ENSMUSG00000059923/…	90
GO:0016054	organic acid catabolic process	137/7747	227/16212	0.603524	1.26298	3.81719	8.65183e-05	0.00179946	0.00127317	ENSMUSG00000020283/ENSMUSG00000003623/ENSMUSG00000001729/ENSMUSG00000030268/ENSMUSG00000029445/ENSMUSG00000020003/ENSMUSG00000052102/ENSMUSG00000005069/ENSMUSG00000042647/ENSMUSG00000019278/ENSMUSG00000031958/ENSMUSG00000021033/ENSMUSG00000004789/ENSMUSG00000021240/ENSMUSG00000052392/ENSMUSG00000032263/ENSMUSG00000044288/ENSMUSG00000027513/ENSMUSG00000000673/ENSMUSG00000029597/ENSMUSG00000032902/…	137
GO:0046395	carboxylic acid catabolic process	137/7747	227/16212	0.603524	1.26298	3.81719	8.65183e-05	0.00179946	0.00127317	ENSMUSG00000020283/ENSMUSG00000003623/ENSMUSG00000001729/ENSMUSG00000030268/ENSMUSG00000029445/ENSMUSG00000020003/ENSMUSG00000052102/ENSMUSG00000005069/ENSMUSG00000042647/ENSMUSG00000019278/ENSMUSG00000031958/ENSMUSG00000021033/ENSMUSG00000004789/ENSMUSG00000021240/ENSMUSG00000052392/ENSMUSG00000032263/ENSMUSG00000044288/ENSMUSG00000027513/ENSMUSG00000000673/ENSMUSG00000029597/ENSMUSG00000032902/…	137
GO:0014020	primary neural tube formation	72/7747	109/16212	0.66055	1.38232	3.8313	8.69166e-05	0.0018017	0.00127476	ENSMUSG00000021109/ENSMUSG00000021048/ENSMUSG00000039910/ENSMUSG00000029475/ENSMUSG00000070509/ENSMUSG00000030201/ENSMUSG00000008999/ENSMUSG00000021466/ENSMUSG00000001052/ENSMUSG00000023972/ENSMUSG00000035247/ENSMUSG00000026872/ENSMUSG00000039765/ENSMUSG00000020580/ENSMUSG00000029381/ENSMUSG00000001288/ENSMUSG00000020888/ENSMUSG00000024335/ENSMUSG00000025235/ENSMUSG00000030403/ENSMUSG00000066043/…	72
GO:0035967	cellular response to topologically incorrect protein	64/7747	95/16212	0.673684	1.40981	3.83227	8.74522e-05	0.00180611	0.00127787	ENSMUSG00000026278/ENSMUSG00000040234/ENSMUSG00000075701/ENSMUSG00000024350/ENSMUSG00000028291/ENSMUSG00000054455/ENSMUSG00000031668/ENSMUSG00000041548/ENSMUSG00000026672/ENSMUSG00000053334/ENSMUSG00000020715/ENSMUSG00000027230/ENSMUSG00000032475/ENSMUSG00000021725/ENSMUSG00000020109/ENSMUSG00000022365/ENSMUSG00000015461/ENSMUSG00000002307/ENSMUSG00000057789/ENSMUSG00000040359/ENSMUSG00000026142/…	64
GO:0031647	regulation of protein stability	185/7747	317/16212	0.583596	1.22128	3.80628	8.78852e-05	0.00180611	0.00127787	ENSMUSG00000025958/ENSMUSG00000038845/ENSMUSG00000051355/ENSMUSG00000007739/ENSMUSG00000056342/ENSMUSG00000020458/ENSMUSG00000038250/ENSMUSG00000063273/ENSMUSG00000018398/ENSMUSG00000021270/ENSMUSG00000036282/ENSMUSG00000044548/ENSMUSG00000000915/ENSMUSG00000027358/ENSMUSG00000027353/ENSMUSG00000024454/ENSMUSG00000057666/ENSMUSG00000030213/ENSMUSG00000032652/ENSMUSG00000030107/ENSMUSG00000031826/…	185
GO:0038202	TORC1 signaling	68/7747	102/16212	0.666667	1.39512	3.82948	8.80033e-05	0.00180611	0.00127787	ENSMUSG00000035992/ENSMUSG00000001729/ENSMUSG00000028300/ENSMUSG00000024493/ENSMUSG00000024576/ENSMUSG00000001518/ENSMUSG00000031959/ENSMUSG00000028278/ENSMUSG00000024283/ENSMUSG00000019927/ENSMUSG00000047496/ENSMUSG00000049323/ENSMUSG00000035953/ENSMUSG00000021457/ENSMUSG00000027579/ENSMUSG00000024413/ENSMUSG00000047789/ENSMUSG00000021180/ENSMUSG00000061175/ENSMUSG00000037331/ENSMUSG00000020386/…	68
GO:0016482	cytosolic transport	81/7747	125/16212	0.648	1.35606	3.82292	8.89591e-05	0.0018197	0.00128749	ENSMUSG00000014602/ENSMUSG00000020152/ENSMUSG00000020128/ENSMUSG00000074513/ENSMUSG00000030245/ENSMUSG00000021589/ENSMUSG00000029462/ENSMUSG00000020375/ENSMUSG00000024101/ENSMUSG00000030172/ENSMUSG00000031731/ENSMUSG00000034973/ENSMUSG00000027522/ENSMUSG00000024127/ENSMUSG00000026737/ENSMUSG00000006740/ENSMUSG00000068747/ENSMUSG00000022125/ENSMUSG00000031447/ENSMUSG00000038039/ENSMUSG00000038671/…	81
GO:0030513	positive regulation of BMP signaling pathway	28/7747	35/16212	0.8	1.67414	3.81941	9.31056e-05	0.00188584	0.00133429	ENSMUSG00000021944/ENSMUSG00000056004/ENSMUSG00000020802/ENSMUSG00000005836/ENSMUSG00000042275/ENSMUSG00000048450/ENSMUSG00000048001/ENSMUSG00000000530/ENSMUSG00000032340/ENSMUSG00000066306/ENSMUSG00000030890/ENSMUSG00000027878/ENSMUSG00000039191/ENSMUSG00000045333/ENSMUSG00000026923/ENSMUSG00000025427/ENSMUSG00000024563/ENSMUSG00000021835/ENSMUSG00000062960/ENSMUSG00000038259/ENSMUSG00000021469/…	28
GO:0035794	positive regulation of mitochondrial membrane permeability	28/7747	35/16212	0.8	1.67414	3.81941	9.31056e-05	0.00188584	0.00133429	ENSMUSG00000026278/ENSMUSG00000022812/ENSMUSG00000064326/ENSMUSG00000000915/ENSMUSG00000004446/ENSMUSG00000000738/ENSMUSG00000059363/ENSMUSG00000025933/ENSMUSG00000032350/ENSMUSG00000021868/ENSMUSG00000021771/ENSMUSG00000031633/ENSMUSG00000059552/ENSMUSG00000003541/ENSMUSG00000057789/ENSMUSG00000017686/ENSMUSG00000036880/ENSMUSG00000025733/ENSMUSG00000027381/ENSMUSG00000007659/ENSMUSG00000069041/…	28
GO:0048013	ephrin receptor signaling pathway	28/7747	35/16212	0.8	1.67414	3.81941	9.31056e-05	0.00188584	0.00133429	ENSMUSG00000024456/ENSMUSG00000043733/ENSMUSG00000042700/ENSMUSG00000028876/ENSMUSG00000032475/ENSMUSG00000052504/ENSMUSG00000037013/ENSMUSG00000029710/ENSMUSG00000003934/ENSMUSG00000001300/ENSMUSG00000029859/ENSMUSG00000029869/ENSMUSG00000048915/ENSMUSG00000026259/ENSMUSG00000005958/ENSMUSG00000048895/ENSMUSG00000002489/ENSMUSG00000039191/ENSMUSG00000026235/ENSMUSG00000026923/ENSMUSG00000029245/…	28
GO:0071453	cellular response to oxygen levels	102/7747	163/16212	0.625767	1.30953	3.79954	9.55869e-05	0.00192763	0.00136386	ENSMUSG00000051980/ENSMUSG00000052459/ENSMUSG00000051355/ENSMUSG00000020458/ENSMUSG00000038023/ENSMUSG00000037161/ENSMUSG00000001729/ENSMUSG00000079055/ENSMUSG00000021109/ENSMUSG00000039910/ENSMUSG00000003031/ENSMUSG00000021032/ENSMUSG00000027513/ENSMUSG00000024140/ENSMUSG00000071984/ENSMUSG00000057329/ENSMUSG00000022789/ENSMUSG00000029524/ENSMUSG00000026646/ENSMUSG00000023942/ENSMUSG00000023951/…	102
GO:0035567	non-canonical Wnt signaling pathway	41/7747	56/16212	0.732143	1.53214	3.81604	9.5963e-05	0.00192763	0.00136386	ENSMUSG00000044674/ENSMUSG00000044548/ENSMUSG00000030201/ENSMUSG00000030170/ENSMUSG00000081683/ENSMUSG00000041075/ENSMUSG00000021464/ENSMUSG00000018822/ENSMUSG00000028871/ENSMUSG00000032547/ENSMUSG00000049791/ENSMUSG00000027329/ENSMUSG00000028496/ENSMUSG00000020888/ENSMUSG00000022150/ENSMUSG00000027996/ENSMUSG00000040260/ENSMUSG00000079487/ENSMUSG00000019880/ENSMUSG00000036158/ENSMUSG00000002489/…	41
GO:0002931	response to ischemia	44/7747	61/16212	0.721311	1.50947	3.8137	9.66846e-05	0.00192763	0.00136386	ENSMUSG00000051980/ENSMUSG00000030247/ENSMUSG00000005583/ENSMUSG00000071369/ENSMUSG00000029470/ENSMUSG00000024621/ENSMUSG00000024617/ENSMUSG00000003849/ENSMUSG00000038418/ENSMUSG00000014599/ENSMUSG00000057329/ENSMUSG00000021868/ENSMUSG00000030965/ENSMUSG00000020580/ENSMUSG00000000628/ENSMUSG00000004040/ENSMUSG00000029503/ENSMUSG00000059552/ENSMUSG00000032462/ENSMUSG00000037012/ENSMUSG00000031934/…	44
GO:0043583	ear development	147/7747	246/16212	0.597561	1.2505	3.78742	9.68129e-05	0.00192763	0.00136386	ENSMUSG00000026280/ENSMUSG00000005917/ENSMUSG00000026768/ENSMUSG00000031616/ENSMUSG00000018395/ENSMUSG00000051367/ENSMUSG00000027966/ENSMUSG00000027358/ENSMUSG00000010461/ENSMUSG00000015134/ENSMUSG00000024497/ENSMUSG00000003031/ENSMUSG00000043733/ENSMUSG00000032419/ENSMUSG00000022783/ENSMUSG00000024238/ENSMUSG00000018604/ENSMUSG00000026976/ENSMUSG00000057329/ENSMUSG00000022483/ENSMUSG00000022114/…	147
GO:0031123	RNA 3'-end processing	61/7747	90/16212	0.677778	1.41837	3.80744	9.71511e-05	0.00192763	0.00136386	ENSMUSG00000027770/ENSMUSG00000020273/ENSMUSG00000020464/ENSMUSG00000029427/ENSMUSG00000109941/ENSMUSG00000027498/ENSMUSG00000022774/ENSMUSG00000024234/ENSMUSG00000027893/ENSMUSG00000031792/ENSMUSG00000049285/ENSMUSG00000039001/ENSMUSG00000035161/ENSMUSG00000024400/ENSMUSG00000050188/ENSMUSG00000028330/ENSMUSG00000041328/ENSMUSG00000021111/ENSMUSG00000046865/ENSMUSG00000031403/ENSMUSG00000066107/…	61
GO:0045926	negative regulation of growth	133/7747	220/16212	0.604545	1.26512	3.78758	9.76877e-05	0.00192763	0.00136386	ENSMUSG00000022508/ENSMUSG00000026283/ENSMUSG00000022812/ENSMUSG00000038845/ENSMUSG00000049800/ENSMUSG00000000861/ENSMUSG00000020464/ENSMUSG00000020458/ENSMUSG00000021109/ENSMUSG00000039910/ENSMUSG00000070509/ENSMUSG00000030330/ENSMUSG00000003031/ENSMUSG00000030168/ENSMUSG00000042605/ENSMUSG00000027523/ENSMUSG00000025810/ENSMUSG00000068744/ENSMUSG00000057329/ENSMUSG00000030309/ENSMUSG00000067336/…	133
GO:0170033	L-amino acid metabolic process	108/7747	174/16212	0.62069	1.29891	3.7922	9.78846e-05	0.00192763	0.00136386	ENSMUSG00000026279/ENSMUSG00000027737/ENSMUSG00000018906/ENSMUSG00000011148/ENSMUSG00000037686/ENSMUSG00000021048/ENSMUSG00000030268/ENSMUSG00000029445/ENSMUSG00000021033/ENSMUSG00000004789/ENSMUSG00000000673/ENSMUSG00000029597/ENSMUSG00000031672/ENSMUSG00000054474/ENSMUSG00000029361/ENSMUSG00000000301/ENSMUSG00000020534/ENSMUSG00000033022/ENSMUSG00000029524/ENSMUSG00000062937/ENSMUSG00000025007/…	108
GO:0019395	fatty acid oxidation	69/7747	104/16212	0.663462	1.38841	3.80144	9.84904e-05	0.00192763	0.00136386	ENSMUSG00000020283/ENSMUSG00000003623/ENSMUSG00000001729/ENSMUSG00000030249/ENSMUSG00000020003/ENSMUSG00000055652/ENSMUSG00000005069/ENSMUSG00000030168/ENSMUSG00000042647/ENSMUSG00000021240/ENSMUSG00000044288/ENSMUSG00000038894/ENSMUSG00000029524/ENSMUSG00000029545/ENSMUSG00000026664/ENSMUSG00000042010/ENSMUSG00000020777/ENSMUSG00000020810/ENSMUSG00000028655/ENSMUSG00000040374/ENSMUSG00000028773/…	69
GO:0035282	segmentation	69/7747	104/16212	0.663462	1.38841	3.80144	9.84904e-05	0.00192763	0.00136386	ENSMUSG00000034064/ENSMUSG00000031616/ENSMUSG00000051367/ENSMUSG00000030513/ENSMUSG00000030201/ENSMUSG00000042812/ENSMUSG00000019969/ENSMUSG00000032419/ENSMUSG00000058835/ENSMUSG00000025810/ENSMUSG00000018604/ENSMUSG00000055799/ENSMUSG00000037868/ENSMUSG00000048138/ENSMUSG00000021464/ENSMUSG00000078202/ENSMUSG00000040140/ENSMUSG00000026872/ENSMUSG00000024294/ENSMUSG00000022061/ENSMUSG00000048001/…	69
GO:0090130	tissue migration	69/7747	104/16212	0.663462	1.38841	3.80144	9.84904e-05	0.00192763	0.00136386	ENSMUSG00000020458/ENSMUSG00000026728/ENSMUSG00000021262/ENSMUSG00000021109/ENSMUSG00000027356/ENSMUSG00000024486/ENSMUSG00000055333/ENSMUSG00000042812/ENSMUSG00000001672/ENSMUSG00000043733/ENSMUSG00000024277/ENSMUSG00000038894/ENSMUSG00000067336/ENSMUSG00000032702/ENSMUSG00000071856/ENSMUSG00000004530/ENSMUSG00000026872/ENSMUSG00000028434/ENSMUSG00000001507/ENSMUSG00000035783/ENSMUSG00000058325/…	69
GO:0007369	gastrulation	114/7747	185/16212	0.616216	1.28954	3.78907	9.85898e-05	0.00192763	0.00136386	ENSMUSG00000034064/ENSMUSG00000033149/ENSMUSG00000026768/ENSMUSG00000006932/ENSMUSG00000031681/ENSMUSG00000044548/ENSMUSG00000027966/ENSMUSG00000021944/ENSMUSG00000019850/ENSMUSG00000030201/ENSMUSG00000045962/ENSMUSG00000030170/ENSMUSG00000042812/ENSMUSG00000008999/ENSMUSG00000031790/ENSMUSG00000026981/ENSMUSG00000067336/ENSMUSG00000003032/ENSMUSG00000028495/ENSMUSG00000041075/ENSMUSG00000038671/…	114
GO:0071375	cellular response to peptide hormone stimulus	181/7747	310/16212	0.583871	1.22186	3.77297	0.000100566	0.00196008	0.00138682	ENSMUSG00000047443/ENSMUSG00000022812/ENSMUSG00000045658/ENSMUSG00000006932/ENSMUSG00000031616/ENSMUSG00000037161/ENSMUSG00000018899/ENSMUSG00000001729/ENSMUSG00000059436/ENSMUSG00000026778/ENSMUSG00000019970/ENSMUSG00000024353/ENSMUSG00000024617/ENSMUSG00000031823/ENSMUSG00000043733/ENSMUSG00000028284/ENSMUSG00000027523/ENSMUSG00000027513/ENSMUSG00000024143/ENSMUSG00000024107/ENSMUSG00000026737/…	181
GO:0006644	phospholipid metabolic process	191/7747	329/16212	0.580547	1.2149	3.76726	0.00010237	0.001989	0.00140727	ENSMUSG00000037936/ENSMUSG00000037686/ENSMUSG00000037526/ENSMUSG00000021054/ENSMUSG00000027346/ENSMUSG00000021273/ENSMUSG00000026317/ENSMUSG00000024620/ENSMUSG00000004270/ENSMUSG00000030214/ENSMUSG00000058979/ENSMUSG00000006517/ENSMUSG00000029598/ENSMUSG00000036918/ENSMUSG00000023805/ENSMUSG00000023827/ENSMUSG00000075703/ENSMUSG00000026737/ENSMUSG00000040774/ENSMUSG00000055912/ENSMUSG00000060733/…	191
GO:0060491	regulation of cell projection assembly	121/7747	198/16212	0.611111	1.27886	3.77684	0.000102912	0.00199328	0.0014103	ENSMUSG00000022812/ENSMUSG00000020152/ENSMUSG00000001729/ENSMUSG00000021270/ENSMUSG00000021262/ENSMUSG00000026778/ENSMUSG00000029468/ENSMUSG00000024501/ENSMUSG00000021218/ENSMUSG00000033862/ENSMUSG00000001482/ENSMUSG00000021253/ENSMUSG00000024253/ENSMUSG00000024143/ENSMUSG00000025810/ENSMUSG00000026782/ENSMUSG00000028492/ENSMUSG00000032702/ENSMUSG00000004530/ENSMUSG00000041598/ENSMUSG00000022272/…	121
GO:0030100	regulation of endocytosis	182/7747	312/16212	0.583333	1.22073	3.76617	0.000103267	0.00199392	0.00141075	ENSMUSG00000037936/ENSMUSG00000031712/ENSMUSG00000018395/ENSMUSG00000000915/ENSMUSG00000021057/ENSMUSG00000029465/ENSMUSG00000020375/ENSMUSG00000049107/ENSMUSG00000006519/ENSMUSG00000042605/ENSMUSG00000020961/ENSMUSG00000033419/ENSMUSG00000002365/ENSMUSG00000036591/ENSMUSG00000069601/ENSMUSG00000022789/ENSMUSG00000020132/ENSMUSG00000031451/ENSMUSG00000028488/ENSMUSG00000021457/ENSMUSG00000039145/…	182
GO:0006986	response to unfolded protein	70/7747	106/16212	0.660377	1.38196	3.77428	0.000109735	0.00209273	0.00148067	ENSMUSG00000026278/ENSMUSG00000021270/ENSMUSG00000005078/ENSMUSG00000040234/ENSMUSG00000075701/ENSMUSG00000054455/ENSMUSG00000031668/ENSMUSG00000041548/ENSMUSG00000026672/ENSMUSG00000053334/ENSMUSG00000038648/ENSMUSG00000020715/ENSMUSG00000027230/ENSMUSG00000032475/ENSMUSG00000021725/ENSMUSG00000023286/ENSMUSG00000022365/ENSMUSG00000015461/ENSMUSG00000002307/ENSMUSG00000057789/ENSMUSG00000040359/…	70
GO:0007265	Ras protein signal transduction	70/7747	106/16212	0.660377	1.38196	3.77428	0.000109735	0.00209273	0.00148067	ENSMUSG00000026727/ENSMUSG00000037533/ENSMUSG00000030265/ENSMUSG00000024427/ENSMUSG00000001517/ENSMUSG00000029458/ENSMUSG00000029602/ENSMUSG00000027859/ENSMUSG00000014599/ENSMUSG00000022469/ENSMUSG00000022114/ENSMUSG00000031453/ENSMUSG00000069805/ENSMUSG00000022105/ENSMUSG00000006906/ENSMUSG00000059923/ENSMUSG00000040479/ENSMUSG00000021701/ENSMUSG00000030134/ENSMUSG00000073514/ENSMUSG00000062232/…	70
GO:0022404	molting cycle process	70/7747	106/16212	0.660377	1.38196	3.77428	0.000109735	0.00209273	0.00148067	ENSMUSG00000022510/ENSMUSG00000034066/ENSMUSG00000006932/ENSMUSG00000001729/ENSMUSG00000027356/ENSMUSG00000061048/ENSMUSG00000019969/ENSMUSG00000027523/ENSMUSG00000028640/ENSMUSG00000057329/ENSMUSG00000003227/ENSMUSG00000028403/ENSMUSG00000046470/ENSMUSG00000043207/ENSMUSG00000027253/ENSMUSG00000070990/ENSMUSG00000039706/ENSMUSG00000035557/ENSMUSG00000001751/ENSMUSG00000001655/ENSMUSG00000000532/…	70
GO:0022405	hair cycle process	70/7747	106/16212	0.660377	1.38196	3.77428	0.000109735	0.00209273	0.00148067	ENSMUSG00000022510/ENSMUSG00000034066/ENSMUSG00000006932/ENSMUSG00000001729/ENSMUSG00000027356/ENSMUSG00000061048/ENSMUSG00000019969/ENSMUSG00000027523/ENSMUSG00000028640/ENSMUSG00000057329/ENSMUSG00000003227/ENSMUSG00000028403/ENSMUSG00000046470/ENSMUSG00000043207/ENSMUSG00000027253/ENSMUSG00000070990/ENSMUSG00000039706/ENSMUSG00000035557/ENSMUSG00000001751/ENSMUSG00000001655/ENSMUSG00000000532/…	70
GO:0030510	regulation of BMP signaling pathway	66/7747	99/16212	0.666667	1.39512	3.7724	0.000111174	0.00211366	0.00149548	ENSMUSG00000022816/ENSMUSG00000044674/ENSMUSG00000021096/ENSMUSG00000021944/ENSMUSG00000070509/ENSMUSG00000033014/ENSMUSG00000036580/ENSMUSG00000056004/ENSMUSG00000061436/ENSMUSG00000020802/ENSMUSG00000005836/ENSMUSG00000042275/ENSMUSG00000001507/ENSMUSG00000048450/ENSMUSG00000048001/ENSMUSG00000037573/ENSMUSG00000000530/ENSMUSG00000032340/ENSMUSG00000044857/ENSMUSG00000050069/ENSMUSG00000066306/…	66
GO:0021700	developmental maturation	205/7747	356/16212	0.575843	1.20506	3.74246	0.000112207	0.00212679	0.00150476	ENSMUSG00000034066/ENSMUSG00000022812/ENSMUSG00000052459/ENSMUSG00000000861/ENSMUSG00000006932/ENSMUSG00000032556/ENSMUSG00000031616/ENSMUSG00000031712/ENSMUSG00000001729/ENSMUSG00000021109/ENSMUSG00000021057/ENSMUSG00000027358/ENSMUSG00000027356/ENSMUSG00000041741/ENSMUSG00000039089/ENSMUSG00000060275/ENSMUSG00000024101/ENSMUSG00000019210/ENSMUSG00000061048/ENSMUSG00000031731/ENSMUSG00000019969/…	205
GO:0032272	negative regulation of protein polymerization	48/7747	68/16212	0.705882	1.47719	3.77221	0.000114123	0.0021565	0.00152578	ENSMUSG00000020315/ENSMUSG00000021262/ENSMUSG00000000915/ENSMUSG00000021061/ENSMUSG00000019970/ENSMUSG00000030357/ENSMUSG00000024236/ENSMUSG00000056737/ENSMUSG00000002812/ENSMUSG00000032702/ENSMUSG00000029840/ENSMUSG00000042121/ENSMUSG00000027274/ENSMUSG00000028328/ENSMUSG00000021771/ENSMUSG00000048096/ENSMUSG00000030000/ENSMUSG00000042099/ENSMUSG00000025235/ENSMUSG00000040811/ENSMUSG00000027995/…	48
GO:0016331	morphogenesis of embryonic epithelium	105/7747	169/16212	0.621302	1.30019	3.75275	0.000114861	0.0021575	0.00152649	ENSMUSG00000022510/ENSMUSG00000006932/ENSMUSG00000051367/ENSMUSG00000021109/ENSMUSG00000021048/ENSMUSG00000039910/ENSMUSG00000029475/ENSMUSG00000070509/ENSMUSG00000015134/ENSMUSG00000038593/ENSMUSG00000030201/ENSMUSG00000032419/ENSMUSG00000028284/ENSMUSG00000008999/ENSMUSG00000027840/ENSMUSG00000026976/ENSMUSG00000060733/ENSMUSG00000021466/ENSMUSG00000001052/ENSMUSG00000020782/ENSMUSG00000023972/…	105
GO:2001234	negative regulation of apoptotic signaling pathway	137/7747	228/16212	0.600877	1.25744	3.74512	0.000115282	0.0021575	0.00152649	ENSMUSG00000026278/ENSMUSG00000022812/ENSMUSG00000044674/ENSMUSG00000006932/ENSMUSG00000001729/ENSMUSG00000021109/ENSMUSG00000021944/ENSMUSG00000019850/ENSMUSG00000010461/ENSMUSG00000028578/ENSMUSG00000029474/ENSMUSG00000075701/ENSMUSG00000030189/ENSMUSG00000004446/ENSMUSG00000019969/ENSMUSG00000028284/ENSMUSG00000006818/ENSMUSG00000026739/ENSMUSG00000025810/ENSMUSG00000035984/ENSMUSG00000000001/…	137
GO:0048593	camera-type eye morphogenesis	89/7747	140/16212	0.635714	1.33035	3.75541	0.000115568	0.0021575	0.00152649	ENSMUSG00000022656/ENSMUSG00000020160/ENSMUSG00000006932/ENSMUSG00000021109/ENSMUSG00000039910/ENSMUSG00000029475/ENSMUSG00000015134/ENSMUSG00000030201/ENSMUSG00000008999/ENSMUSG00000024238/ENSMUSG00000008730/ENSMUSG00000026782/ENSMUSG00000031450/ENSMUSG00000008435/ENSMUSG00000045493/ENSMUSG00000061436/ENSMUSG00000029838/ENSMUSG00000028023/ENSMUSG00000041592/ENSMUSG00000023951/ENSMUSG00000027276/…	89
GO:0071456	cellular response to hypoxia	89/7747	140/16212	0.635714	1.33035	3.75541	0.000115568	0.0021575	0.00152649	ENSMUSG00000051980/ENSMUSG00000051355/ENSMUSG00000020458/ENSMUSG00000037161/ENSMUSG00000001729/ENSMUSG00000079055/ENSMUSG00000021109/ENSMUSG00000039910/ENSMUSG00000003031/ENSMUSG00000021032/ENSMUSG00000027513/ENSMUSG00000024140/ENSMUSG00000071984/ENSMUSG00000057329/ENSMUSG00000022789/ENSMUSG00000029524/ENSMUSG00000026646/ENSMUSG00000023942/ENSMUSG00000023951/ENSMUSG00000005836/ENSMUSG00000022061/…	89
GO:0003281	ventricular septum development	55/7747	80/16212	0.6875	1.43872	3.76309	0.000117251	0.00218235	0.00154408	ENSMUSG00000044674/ENSMUSG00000021944/ENSMUSG00000039910/ENSMUSG00000030201/ENSMUSG00000018604/ENSMUSG00000026976/ENSMUSG00000067336/ENSMUSG00000020644/ENSMUSG00000001870/ENSMUSG00000028023/ENSMUSG00000023972/ENSMUSG00000032744/ENSMUSG00000035247/ENSMUSG00000040289/ENSMUSG00000032327/ENSMUSG00000007613/ENSMUSG00000021796/ENSMUSG00000020170/ENSMUSG00000031558/ENSMUSG00000035152/ENSMUSG00000025880/…	55
GO:0070085	glycosylation	124/7747	204/16212	0.607843	1.27202	3.74032	0.000118651	0.00220179	0.00155783	ENSMUSG00000034064/ENSMUSG00000022793/ENSMUSG00000051650/ENSMUSG00000003418/ENSMUSG00000031712/ENSMUSG00000029431/ENSMUSG00000030283/ENSMUSG00000025789/ENSMUSG00000031916/ENSMUSG00000019969/ENSMUSG00000056131/ENSMUSG00000028277/ENSMUSG00000031749/ENSMUSG00000031753/ENSMUSG00000056091/ENSMUSG00000036197/ENSMUSG00000022125/ENSMUSG00000024172/ENSMUSG00000028413/ENSMUSG00000036646/ENSMUSG00000026944/…	124
GO:0035924	cellular response to vascular endothelial growth factor stimulus	42/7747	58/16212	0.724138	1.51539	3.76156	0.000120064	0.00222136	0.00157168	ENSMUSG00000031714/ENSMUSG00000001729/ENSMUSG00000024620/ENSMUSG00000004791/ENSMUSG00000033960/ENSMUSG00000025810/ENSMUSG00000031785/ENSMUSG00000022114/ENSMUSG00000019647/ENSMUSG00000062352/ENSMUSG00000024066/ENSMUSG00000061878/ENSMUSG00000020715/ENSMUSG00000023951/ENSMUSG00000001240/ENSMUSG00000023034/ENSMUSG00000041187/ENSMUSG00000032462/ENSMUSG00000014773/ENSMUSG00000023886/ENSMUSG00000053436/…	42
GO:0050772	positive regulation of axonogenesis	63/7747	94/16212	0.670213	1.40254	3.74436	0.000124924	0.0023044	0.00163043	ENSMUSG00000026277/ENSMUSG00000022812/ENSMUSG00000000861/ENSMUSG00000032536/ENSMUSG00000031729/ENSMUSG00000004788/ENSMUSG00000033419/ENSMUSG00000025810/ENSMUSG00000027859/ENSMUSG00000050947/ENSMUSG00000020476/ENSMUSG00000067336/ENSMUSG00000059363/ENSMUSG00000018820/ENSMUSG00000026965/ENSMUSG00000029765/ENSMUSG00000023951/ENSMUSG00000015605/ENSMUSG00000026872/ENSMUSG00000001313/ENSMUSG00000031398/…	63
GO:0120032	regulation of plasma membrane bounded cell projection assembly	119/7747	195/16212	0.610256	1.27707	3.72372	0.000127184	0.00233913	0.001655	ENSMUSG00000022812/ENSMUSG00000020152/ENSMUSG00000001729/ENSMUSG00000021270/ENSMUSG00000021262/ENSMUSG00000026778/ENSMUSG00000029468/ENSMUSG00000024501/ENSMUSG00000021218/ENSMUSG00000033862/ENSMUSG00000001482/ENSMUSG00000021253/ENSMUSG00000024253/ENSMUSG00000024143/ENSMUSG00000025810/ENSMUSG00000026782/ENSMUSG00000028492/ENSMUSG00000032702/ENSMUSG00000004530/ENSMUSG00000041598/ENSMUSG00000022272/…	119
GO:0010977	negative regulation of neuron projection development	91/7747	144/16212	0.631944	1.32246	3.71819	0.000133593	0.00244973	0.00173326	ENSMUSG00000022812/ENSMUSG00000000861/ENSMUSG00000020467/ENSMUSG00000020458/ENSMUSG00000026728/ENSMUSG00000037161/ENSMUSG00000069171/ENSMUSG00000070509/ENSMUSG00000024456/ENSMUSG00000024501/ENSMUSG00000030357/ENSMUSG00000019969/ENSMUSG00000025810/ENSMUSG00000032913/ENSMUSG00000037855/ENSMUSG00000032702/ENSMUSG00000025020/ENSMUSG00000036580/ENSMUSG00000014554/ENSMUSG00000027253/ENSMUSG00000032547/…	91
GO:0050684	regulation of mRNA processing	86/7747	135/16212	0.637037	1.33312	3.71807	0.000134439	0.00245267	0.00173534	ENSMUSG00000027763/ENSMUSG00000027770/ENSMUSG00000022185/ENSMUSG00000064138/ENSMUSG00000021210/ENSMUSG00000010608/ENSMUSG00000060475/ENSMUSG00000062078/ENSMUSG00000027893/ENSMUSG00000022475/ENSMUSG00000022120/ENSMUSG00000038398/ENSMUSG00000063919/ENSMUSG00000042650/ENSMUSG00000029538/ENSMUSG00000024384/ENSMUSG00000028790/ENSMUSG00000043962/ENSMUSG00000005506/ENSMUSG00000028409/ENSMUSG00000028330/…	86
GO:0034440	lipid oxidation	72/7747	110/16212	0.654545	1.36975	3.72245	0.000134545	0.00245267	0.00173534	ENSMUSG00000020283/ENSMUSG00000003623/ENSMUSG00000001729/ENSMUSG00000030249/ENSMUSG00000020003/ENSMUSG00000055652/ENSMUSG00000005069/ENSMUSG00000030168/ENSMUSG00000042647/ENSMUSG00000021240/ENSMUSG00000044288/ENSMUSG00000038894/ENSMUSG00000029524/ENSMUSG00000029545/ENSMUSG00000026664/ENSMUSG00000042010/ENSMUSG00000020777/ENSMUSG00000020810/ENSMUSG00000023913/ENSMUSG00000028655/ENSMUSG00000040374/…	72
GO:0006635	fatty acid beta-oxidation	49/7747	70/16212	0.7	1.46488	3.72878	0.000135833	0.00246168	0.00174171	ENSMUSG00000003623/ENSMUSG00000001729/ENSMUSG00000020003/ENSMUSG00000005069/ENSMUSG00000042647/ENSMUSG00000021240/ENSMUSG00000044288/ENSMUSG00000038894/ENSMUSG00000029545/ENSMUSG00000042010/ENSMUSG00000020777/ENSMUSG00000028655/ENSMUSG00000040374/ENSMUSG00000027809/ENSMUSG00000024507/ENSMUSG00000028127/ENSMUSG00000018574/ENSMUSG00000059201/ENSMUSG00000004610/ENSMUSG00000032314/ENSMUSG00000028893/…	49
GO:0070301	cellular response to hydrogen peroxide	49/7747	70/16212	0.7	1.46488	3.72878	0.000135833	0.00246168	0.00174171	ENSMUSG00000031616/ENSMUSG00000019850/ENSMUSG00000071369/ENSMUSG00000024620/ENSMUSG00000021215/ENSMUSG00000003849/ENSMUSG00000021032/ENSMUSG00000003032/ENSMUSG00000035960/ENSMUSG00000059363/ENSMUSG00000026822/ENSMUSG00000061878/ENSMUSG00000020715/ENSMUSG00000021868/ENSMUSG00000001034/ENSMUSG00000027342/ENSMUSG00000018476/ENSMUSG00000002602/ENSMUSG00000032006/ENSMUSG00000031997/ENSMUSG00000027646/…	49
GO:0007006	mitochondrial membrane organization	64/7747	96/16212	0.666667	1.39512	3.71445	0.000140489	0.00253549	0.00179394	ENSMUSG00000026278/ENSMUSG00000022812/ENSMUSG00000020361/ENSMUSG00000064326/ENSMUSG00000021270/ENSMUSG00000000915/ENSMUSG00000026317/ENSMUSG00000024617/ENSMUSG00000005069/ENSMUSG00000004446/ENSMUSG00000000738/ENSMUSG00000021044/ENSMUSG00000095677/ENSMUSG00000052337/ENSMUSG00000057329/ENSMUSG00000059363/ENSMUSG00000025933/ENSMUSG00000032350/ENSMUSG00000053768/ENSMUSG00000027282/ENSMUSG00000021868/…	64
GO:0090090	negative regulation of canonical Wnt signaling pathway	77/7747	119/16212	0.647059	1.35409	3.70872	0.000141072	0.00253549	0.00179394	ENSMUSG00000022812/ENSMUSG00000044674/ENSMUSG00000006932/ENSMUSG00000044548/ENSMUSG00000027358/ENSMUSG00000027356/ENSMUSG00000024576/ENSMUSG00000018583/ENSMUSG00000030170/ENSMUSG00000035274/ENSMUSG00000032419/ENSMUSG00000038418/ENSMUSG00000014329/ENSMUSG00000021464/ENSMUSG00000071856/ENSMUSG00000018822/ENSMUSG00000020733/ENSMUSG00000027253/ENSMUSG00000043252/ENSMUSG00000042258/ENSMUSG00000000142/…	77
GO:0042559	pteridine-containing compound biosynthetic process	7747-12-01	12/16212	1	2.09268	3.6223	0.000141134	0.00253549	0.00179394	ENSMUSG00000021048/ENSMUSG00000033735/ENSMUSG00000021496/ENSMUSG00000020098/ENSMUSG00000015806/ENSMUSG00000022962/ENSMUSG00000009566/ENSMUSG00000037580/ENSMUSG00000040675/ENSMUSG00000032067/ENSMUSG00000021707/ENSMUSG00000026192	12
GO:0003143	embryonic heart tube morphogenesis	46/7747	65/16212	0.707692	1.48097	3.71698	0.000143076	0.00256296	0.00181336	ENSMUSG00000018395/ENSMUSG00000021109/ENSMUSG00000021944/ENSMUSG00000005583/ENSMUSG00000039910/ENSMUSG00000030201/ENSMUSG00000019969/ENSMUSG00000018604/ENSMUSG00000071350/ENSMUSG00000015605/ENSMUSG00000024294/ENSMUSG00000037335/ENSMUSG00000030699/ENSMUSG00000020888/ENSMUSG00000001761/ENSMUSG00000053110/ENSMUSG00000045039/ENSMUSG00000037171/ENSMUSG00000047248/ENSMUSG00000014773/ENSMUSG00000027878/…	46
GO:0009141	nucleoside triphosphate metabolic process	151/7747	255/16212	0.592157	1.2392	3.68303	0.000145629	0.00260118	0.00184041	ENSMUSG00000026281/ENSMUSG00000022708/ENSMUSG00000052459/ENSMUSG00000045658/ENSMUSG00000021109/ENSMUSG00000030249/ENSMUSG00000026773/ENSMUSG00000025781/ENSMUSG00000071359/ENSMUSG00000029468/ENSMUSG00000057666/ENSMUSG00000004267/ENSMUSG00000000399/ENSMUSG00000009112/ENSMUSG00000031958/ENSMUSG00000019969/ENSMUSG00000032420/ENSMUSG00000016252/ENSMUSG00000024143/ENSMUSG00000035984/ENSMUSG00000000563/…	151
GO:0001947	heart looping	43/7747	60/16212	0.716667	1.49975	3.71003	0.00014779	0.00263066	0.00186127	ENSMUSG00000018395/ENSMUSG00000021109/ENSMUSG00000021944/ENSMUSG00000005583/ENSMUSG00000039910/ENSMUSG00000030201/ENSMUSG00000019969/ENSMUSG00000018604/ENSMUSG00000071350/ENSMUSG00000015605/ENSMUSG00000024294/ENSMUSG00000037335/ENSMUSG00000030699/ENSMUSG00000020888/ENSMUSG00000001761/ENSMUSG00000037171/ENSMUSG00000047248/ENSMUSG00000014773/ENSMUSG00000027878/ENSMUSG00000014232/ENSMUSG00000039191/…	43
GO:0003300	cardiac muscle hypertrophy	73/7747	112/16212	0.651786	1.36398	3.6977	0.000148129	0.00263066	0.00186127	ENSMUSG00000022812/ENSMUSG00000020160/ENSMUSG00000031681/ENSMUSG00000027358/ENSMUSG00000021944/ENSMUSG00000005583/ENSMUSG00000066406/ENSMUSG00000030557/ENSMUSG00000029470/ENSMUSG00000029467/ENSMUSG00000024431/ENSMUSG00000052920/ENSMUSG00000036023/ENSMUSG00000029840/ENSMUSG00000042010/ENSMUSG00000005836/ENSMUSG00000059743/ENSMUSG00000039197/ENSMUSG00000031068/ENSMUSG00000020580/ENSMUSG00000050965/…	73
GO:0007059	chromosome segregation	220/7747	386/16212	0.569948	1.19272	3.666	0.000150298	0.00266156	0.00188313	ENSMUSG00000026275/ENSMUSG00000043065/ENSMUSG00000020152/ENSMUSG00000036768/ENSMUSG00000033752/ENSMUSG00000037544/ENSMUSG00000018707/ENSMUSG00000021098/ENSMUSG00000029414/ENSMUSG00000029438/ENSMUSG00000041133/ENSMUSG00000029472/ENSMUSG00000024454/ENSMUSG00000029466/ENSMUSG00000049588/ENSMUSG00000024101/ENSMUSG00000006585/ENSMUSG00000021245/ENSMUSG00000038379/ENSMUSG00000005883/ENSMUSG00000032624/…	220
GO:0032366	intracellular sterol transport	27/7747	34/16212	0.794118	1.66183	3.6956	0.000157509	0.00278131	0.00196785	ENSMUSG00000036292/ENSMUSG00000020128/ENSMUSG00000030201/ENSMUSG00000026737/ENSMUSG00000026319/ENSMUSG00000039050/ENSMUSG00000026944/ENSMUSG00000024319/ENSMUSG00000024413/ENSMUSG00000024378/ENSMUSG00000002308/ENSMUSG00000017288/ENSMUSG00000037278/ENSMUSG00000024030/ENSMUSG00000015243/ENSMUSG00000031574/ENSMUSG00000023068/ENSMUSG00000040111/ENSMUSG00000037295/ENSMUSG00000032231/ENSMUSG00000030105/…	27
GO:1901293	nucleoside phosphate biosynthetic process	162/7747	276/16212	0.586957	1.22831	3.65977	0.000158291	0.00278719	0.00197201	ENSMUSG00000026281/ENSMUSG00000052459/ENSMUSG00000001891/ENSMUSG00000045658/ENSMUSG00000020402/ENSMUSG00000011148/ENSMUSG00000021048/ENSMUSG00000030282/ENSMUSG00000025781/ENSMUSG00000021696/ENSMUSG00000071359/ENSMUSG00000052102/ENSMUSG00000000399/ENSMUSG00000031730/ENSMUSG00000031948/ENSMUSG00000031958/ENSMUSG00000032262/ENSMUSG00000056131/ENSMUSG00000028293/ENSMUSG00000016252/ENSMUSG00000000673/…	162
GO:0035904	aorta development	50/7747	72/16212	0.694444	1.45325	3.68732	0.000160008	0.00280942	0.00198775	ENSMUSG00000031616/ENSMUSG00000051367/ENSMUSG00000024620/ENSMUSG00000054008/ENSMUSG00000037868/ENSMUSG00000024529/ENSMUSG00000001870/ENSMUSG00000001052/ENSMUSG00000015605/ENSMUSG00000027276/ENSMUSG00000035247/ENSMUSG00000040289/ENSMUSG00000022061/ENSMUSG00000001555/ENSMUSG00000001751/ENSMUSG00000000530/ENSMUSG00000029710/ENSMUSG00000020900/ENSMUSG00000059201/ENSMUSG00000021796/ENSMUSG00000001300/…	50
GO:0007163	establishment or maintenance of cell polarity	132/7747	220/16212	0.6	1.25561	3.65169	0.000166603	0.00291696	0.00206383	ENSMUSG00000026277/ENSMUSG00000022812/ENSMUSG00000033149/ENSMUSG00000020152/ENSMUSG00000000600/ENSMUSG00000018395/ENSMUSG00000052609/ENSMUSG00000027356/ENSMUSG00000030247/ENSMUSG00000024454/ENSMUSG00000042812/ENSMUSG00000033419/ENSMUSG00000024143/ENSMUSG00000052397/ENSMUSG00000022783/ENSMUSG00000027883/ENSMUSG00000019944/ENSMUSG00000069601/ENSMUSG00000022114/ENSMUSG00000019920/ENSMUSG00000020536/…	132
GO:0035270	endocrine system development	84/7747	132/16212	0.636364	1.33171	3.66063	0.000168701	0.00294537	0.00208394	ENSMUSG00000025958/ENSMUSG00000040274/ENSMUSG00000031616/ENSMUSG00000051367/ENSMUSG00000027358/ENSMUSG00000021587/ENSMUSG00000039910/ENSMUSG00000024431/ENSMUSG00000024620/ENSMUSG00000026976/ENSMUSG00000031668/ENSMUSG00000019947/ENSMUSG00000061436/ENSMUSG00000028023/ENSMUSG00000015605/ENSMUSG00000040929/ENSMUSG00000005836/ENSMUSG00000070990/ENSMUSG00000042258/ENSMUSG00000063065/ENSMUSG00000032327/…	84
GO:0048738	cardiac muscle tissue development	156/7747	265/16212	0.588679	1.23192	3.64146	0.000170469	0.00296789	0.00209987	ENSMUSG00000025958/ENSMUSG00000022812/ENSMUSG00000020160/ENSMUSG00000006932/ENSMUSG00000031616/ENSMUSG00000031681/ENSMUSG00000027966/ENSMUSG00000027358/ENSMUSG00000021944/ENSMUSG00000030247/ENSMUSG00000005583/ENSMUSG00000039910/ENSMUSG00000066406/ENSMUSG00000030557/ENSMUSG00000024454/ENSMUSG00000036585/ENSMUSG00000024431/ENSMUSG00000024620/ENSMUSG00000030201/ENSMUSG00000032419/ENSMUSG00000008999/…	156
GO:0070482	response to oxygen levels	194/7747	337/16212	0.575668	1.20469	3.63254	0.000172867	0.0030012	0.00212343	ENSMUSG00000051980/ENSMUSG00000052459/ENSMUSG00000051355/ENSMUSG00000020458/ENSMUSG00000038023/ENSMUSG00000031616/ENSMUSG00000037161/ENSMUSG00000001729/ENSMUSG00000079055/ENSMUSG00000021109/ENSMUSG00000027358/ENSMUSG00000030247/ENSMUSG00000030249/ENSMUSG00000030287/ENSMUSG00000039910/ENSMUSG00000003031/ENSMUSG00000040010/ENSMUSG00000021032/ENSMUSG00000021253/ENSMUSG00000004791/ENSMUSG00000027513/…	194
GO:0043542	endothelial cell migration	126/7747	209/16212	0.602871	1.26162	3.64163	0.000174	0.00301243	0.00213138	ENSMUSG00000037936/ENSMUSG00000022816/ENSMUSG00000000600/ENSMUSG00000031714/ENSMUSG00000001729/ENSMUSG00000021109/ENSMUSG00000005583/ENSMUSG00000029470/ENSMUSG00000036585/ENSMUSG00000021256/ENSMUSG00000033960/ENSMUSG00000025810/ENSMUSG00000022475/ENSMUSG00000003032/ENSMUSG00000050666/ENSMUSG00000016128/ENSMUSG00000046470/ENSMUSG00000026822/ENSMUSG00000029838/ENSMUSG00000062352/ENSMUSG00000028017/…	126
GO:0030832	regulation of actin filament length	90/7747	143/16212	0.629371	1.31707	3.64326	0.00017911	0.00309226	0.00218786	ENSMUSG00000020315/ENSMUSG00000021262/ENSMUSG00000000915/ENSMUSG00000021061/ENSMUSG00000039031/ENSMUSG00000038524/ENSMUSG00000029465/ENSMUSG00000024101/ENSMUSG00000031827/ENSMUSG00000040852/ENSMUSG00000002365/ENSMUSG00000024236/ENSMUSG00000020476/ENSMUSG00000056737/ENSMUSG00000002812/ENSMUSG00000032702/ENSMUSG00000029840/ENSMUSG00000042121/ENSMUSG00000015932/ENSMUSG00000041598/ENSMUSG00000059923/…	90
GO:0051090	regulation of DNA-binding transcription factor activity	186/7747	322/16212	0.57764	1.20882	3.62066	0.000181602	0.00311958	0.00220719	ENSMUSG00000022514/ENSMUSG00000051355/ENSMUSG00000003161/ENSMUSG00000044674/ENSMUSG00000001729/ENSMUSG00000064326/ENSMUSG00000021277/ENSMUSG00000021098/ENSMUSG00000027358/ENSMUSG00000026778/ENSMUSG00000019850/ENSMUSG00000043991/ENSMUSG00000024454/ENSMUSG00000024617/ENSMUSG00000030201/ENSMUSG00000030180/ENSMUSG00000030172/ENSMUSG00000032815/ENSMUSG00000031930/ENSMUSG00000033430/ENSMUSG00000027859/…	186
GO:0003206	cardiac chamber morphogenesis	85/7747	134/16212	0.634328	1.32745	3.64112	0.000181698	0.00311958	0.00220719	ENSMUSG00000044674/ENSMUSG00000006932/ENSMUSG00000031616/ENSMUSG00000021109/ENSMUSG00000027966/ENSMUSG00000027358/ENSMUSG00000021944/ENSMUSG00000005583/ENSMUSG00000039910/ENSMUSG00000030201/ENSMUSG00000042812/ENSMUSG00000008999/ENSMUSG00000025810/ENSMUSG00000018604/ENSMUSG00000041957/ENSMUSG00000048349/ENSMUSG00000067336/ENSMUSG00000020644/ENSMUSG00000028023/ENSMUSG00000015605/ENSMUSG00000027276/…	85
GO:0008631	intrinsic apoptotic signaling pathway in response to oxidative stress	41/7747	57/16212	0.719298	1.50526	3.6556	0.000184275	0.00315507	0.0022323	ENSMUSG00000026277/ENSMUSG00000044674/ENSMUSG00000006932/ENSMUSG00000021109/ENSMUSG00000021944/ENSMUSG00000029433/ENSMUSG00000071369/ENSMUSG00000037440/ENSMUSG00000006818/ENSMUSG00000035984/ENSMUSG00000057329/ENSMUSG00000052253/ENSMUSG00000035683/ENSMUSG00000001034/ENSMUSG00000020372/ENSMUSG00000002307/ENSMUSG00000027835/ENSMUSG00000024789/ENSMUSG00000020063/ENSMUSG00000004951/ENSMUSG00000038612/…	41
GO:0048813	dendrite morphogenesis	108/7747	176/16212	0.613636	1.28415	3.62582	0.000187857	0.00320755	0.00226943	ENSMUSG00000014602/ENSMUSG00000027770/ENSMUSG00000022812/ENSMUSG00000020152/ENSMUSG00000032536/ENSMUSG00000044548/ENSMUSG00000021057/ENSMUSG00000019970/ENSMUSG00000030557/ENSMUSG00000024617/ENSMUSG00000042589/ENSMUSG00000052934/ENSMUSG00000042700/ENSMUSG00000035274/ENSMUSG00000058835/ENSMUSG00000025810/ENSMUSG00000068740/ENSMUSG00000026782/ENSMUSG00000020476/ENSMUSG00000037855/ENSMUSG00000032867/…	108
GO:0035265	organ growth	121/7747	200/16212	0.605	1.26607	3.62201	0.000188382	0.00320767	0.00226952	ENSMUSG00000022812/ENSMUSG00000020160/ENSMUSG00000006932/ENSMUSG00000031681/ENSMUSG00000001729/ENSMUSG00000021944/ENSMUSG00000005583/ENSMUSG00000039910/ENSMUSG00000019996/ENSMUSG00000066406/ENSMUSG00000036585/ENSMUSG00000024431/ENSMUSG00000024620/ENSMUSG00000030189/ENSMUSG00000043733/ENSMUSG00000052920/ENSMUSG00000057329/ENSMUSG00000022114/ENSMUSG00000028420/ENSMUSG00000036023/ENSMUSG00000059363/…	121
GO:0042398	cellular modified amino acid biosynthetic process	30/7747	39/16212	0.769231	1.60975	3.64712	0.00019303	0.00324578	0.00229649	ENSMUSG00000027737/ENSMUSG00000001270/ENSMUSG00000021048/ENSMUSG00000031668/ENSMUSG00000032350/ENSMUSG00000028124/ENSMUSG00000004846/ENSMUSG00000030399/ENSMUSG00000006345/ENSMUSG00000031808/ENSMUSG00000024935/ENSMUSG00000022962/ENSMUSG00000024158/ENSMUSG00000009566/ENSMUSG00000037580/ENSMUSG00000040675/ENSMUSG00000027610/ENSMUSG00000027603/ENSMUSG00000015839/ENSMUSG00000028964/ENSMUSG00000005089/…	30
GO:0043001	Golgi to plasma membrane protein transport	30/7747	39/16212	0.769231	1.60975	3.64712	0.00019303	0.00324578	0.00229649	ENSMUSG00000020315/ENSMUSG00000024247/ENSMUSG00000024127/ENSMUSG00000073002/ENSMUSG00000069601/ENSMUSG00000026672/ENSMUSG00000038671/ENSMUSG00000020740/ENSMUSG00000032312/ENSMUSG00000023043/ENSMUSG00000020372/ENSMUSG00000020894/ENSMUSG00000046519/ENSMUSG00000022200/ENSMUSG00000079657/ENSMUSG00000032883/ENSMUSG00000030872/ENSMUSG00000031755/ENSMUSG00000026696/ENSMUSG00000026577/ENSMUSG00000015341/…	30
GO:0043534	blood vessel endothelial cell migration	76/7747	118/16212	0.644068	1.34783	3.62771	0.000193669	0.00324578	0.00229649	ENSMUSG00000037936/ENSMUSG00000031714/ENSMUSG00000001729/ENSMUSG00000021109/ENSMUSG00000005583/ENSMUSG00000029470/ENSMUSG00000021256/ENSMUSG00000033960/ENSMUSG00000025810/ENSMUSG00000022475/ENSMUSG00000003032/ENSMUSG00000016128/ENSMUSG00000046470/ENSMUSG00000062352/ENSMUSG00000020700/ENSMUSG00000023951/ENSMUSG00000015605/ENSMUSG00000021701/ENSMUSG00000061119/ENSMUSG00000048373/ENSMUSG00000001552/…	76
GO:0060840	artery development	76/7747	118/16212	0.644068	1.34783	3.62771	0.000193669	0.00324578	0.00229649	ENSMUSG00000020458/ENSMUSG00000006932/ENSMUSG00000031616/ENSMUSG00000051367/ENSMUSG00000039910/ENSMUSG00000024620/ENSMUSG00000054008/ENSMUSG00000042812/ENSMUSG00000025810/ENSMUSG00000037868/ENSMUSG00000067336/ENSMUSG00000024529/ENSMUSG00000001870/ENSMUSG00000001052/ENSMUSG00000023951/ENSMUSG00000015605/ENSMUSG00000027276/ENSMUSG00000035247/ENSMUSG00000040289/ENSMUSG00000007817/ENSMUSG00000022061/…	76
GO:0001843	neural tube closure	67/7747	102/16212	0.656863	1.3746	3.63064	0.000194101	0.00324578	0.00229649	ENSMUSG00000021048/ENSMUSG00000039910/ENSMUSG00000029475/ENSMUSG00000070509/ENSMUSG00000030201/ENSMUSG00000021466/ENSMUSG00000001052/ENSMUSG00000023972/ENSMUSG00000035247/ENSMUSG00000026872/ENSMUSG00000039765/ENSMUSG00000020580/ENSMUSG00000029381/ENSMUSG00000001288/ENSMUSG00000020888/ENSMUSG00000024335/ENSMUSG00000025235/ENSMUSG00000030403/ENSMUSG00000066043/ENSMUSG00000027996/ENSMUSG00000024795/…	67
GO:0060606	tube closure	67/7747	102/16212	0.656863	1.3746	3.63064	0.000194101	0.00324578	0.00229649	ENSMUSG00000021048/ENSMUSG00000039910/ENSMUSG00000029475/ENSMUSG00000070509/ENSMUSG00000030201/ENSMUSG00000021466/ENSMUSG00000001052/ENSMUSG00000023972/ENSMUSG00000035247/ENSMUSG00000026872/ENSMUSG00000039765/ENSMUSG00000020580/ENSMUSG00000029381/ENSMUSG00000001288/ENSMUSG00000020888/ENSMUSG00000024335/ENSMUSG00000025235/ENSMUSG00000030403/ENSMUSG00000066043/ENSMUSG00000027996/ENSMUSG00000024795/…	67
GO:0140694	non-membrane-bounded organelle assembly	223/7747	393/16212	0.56743	1.18745	3.59874	0.000194286	0.00324578	0.00229649	ENSMUSG00000034066/ENSMUSG00000026273/ENSMUSG00000043065/ENSMUSG00000025962/ENSMUSG00000036768/ENSMUSG00000023087/ENSMUSG00000037544/ENSMUSG00000021282/ENSMUSG00000018707/ENSMUSG00000021109/ENSMUSG00000029414/ENSMUSG00000041133/ENSMUSG00000005583/ENSMUSG00000028300/ENSMUSG00000066406/ENSMUSG00000030557/ENSMUSG00000024454/ENSMUSG00000024620/ENSMUSG00000024608/ENSMUSG00000049588/ENSMUSG00000018583/…	223
GO:1901605	alpha-amino acid metabolic process	122/7747	202/16212	0.60396	1.2639	3.61054	0.000196661	0.00327663	0.00231831	ENSMUSG00000026279/ENSMUSG00000027737/ENSMUSG00000018906/ENSMUSG00000011148/ENSMUSG00000037686/ENSMUSG00000021048/ENSMUSG00000030268/ENSMUSG00000029445/ENSMUSG00000019278/ENSMUSG00000021033/ENSMUSG00000004789/ENSMUSG00000000673/ENSMUSG00000029597/ENSMUSG00000031672/ENSMUSG00000054474/ENSMUSG00000029361/ENSMUSG00000000301/ENSMUSG00000020534/ENSMUSG00000033022/ENSMUSG00000029524/ENSMUSG00000062937/…	122
GO:0045055	regulated exocytosis	137/7747	230/16212	0.595652	1.24651	3.60198	0.000200804	0.00333648	0.00236065	ENSMUSG00000027765/ENSMUSG00000022829/ENSMUSG00000015653/ENSMUSG00000021062/ENSMUSG00000053025/ENSMUSG00000029468/ENSMUSG00000029467/ENSMUSG00000024617/ENSMUSG00000030337/ENSMUSG00000030172/ENSMUSG00000042812/ENSMUSG00000031731/ENSMUSG00000029608/ENSMUSG00000021248/ENSMUSG00000019969/ENSMUSG00000024127/ENSMUSG00000022789/ENSMUSG00000031447/ENSMUSG00000029420/ENSMUSG00000021457/ENSMUSG00000025178/…	137
GO:0072665	protein localization to vacuole	48/7747	69/16212	0.695652	1.45578	3.62948	0.000201638	0.00333648	0.00236065	ENSMUSG00000020128/ENSMUSG00000020458/ENSMUSG00000026718/ENSMUSG00000001729/ENSMUSG00000066278/ENSMUSG00000037526/ENSMUSG00000019850/ENSMUSG00000034105/ENSMUSG00000024107/ENSMUSG00000068747/ENSMUSG00000038039/ENSMUSG00000056234/ENSMUSG00000031479/ENSMUSG00000020740/ENSMUSG00000027534/ENSMUSG00000028581/ENSMUSG00000027775/ENSMUSG00000020580/ENSMUSG00000019518/ENSMUSG00000050552/ENSMUSG00000006021/…	48
GO:0060485	mesenchyme development	171/7747	294/16212	0.581633	1.21717	3.59493	0.000201868	0.00333648	0.00236065	ENSMUSG00000022812/ENSMUSG00000034064/ENSMUSG00000068284/ENSMUSG00000033149/ENSMUSG00000045671/ENSMUSG00000020458/ENSMUSG00000006932/ENSMUSG00000031616/ENSMUSG00000051367/ENSMUSG00000021109/ENSMUSG00000027358/ENSMUSG00000021944/ENSMUSG00000064138/ENSMUSG00000005583/ENSMUSG00000039910/ENSMUSG00000045680/ENSMUSG00000030201/ENSMUSG00000042812/ENSMUSG00000021253/ENSMUSG00000027524/ENSMUSG00000008999/…	171
GO:0010821	regulation of mitochondrion organization	72/7747	111/16212	0.648649	1.35741	3.61465	0.00020485	0.00337675	0.00238915	ENSMUSG00000026278/ENSMUSG00000022812/ENSMUSG00000037161/ENSMUSG00000001729/ENSMUSG00000064326/ENSMUSG00000037679/ENSMUSG00000000915/ENSMUSG00000004446/ENSMUSG00000031730/ENSMUSG00000021044/ENSMUSG00000026775/ENSMUSG00000022789/ENSMUSG00000018599/ENSMUSG00000059363/ENSMUSG00000025933/ENSMUSG00000032350/ENSMUSG00000027282/ENSMUSG00000021868/ENSMUSG00000030793/ENSMUSG00000039428/ENSMUSG00000009647/…	72
GO:0031589	cell-substrate adhesion	193/7747	336/16212	0.574405	1.20205	3.5802	0.0002111	0.00346188	0.00244938	ENSMUSG00000022508/ENSMUSG00000047793/ENSMUSG00000022812/ENSMUSG00000033149/ENSMUSG00000020149/ENSMUSG00000063275/ENSMUSG00000026727/ENSMUSG00000026768/ENSMUSG00000040274/ENSMUSG00000006932/ENSMUSG00000021136/ENSMUSG00000027356/ENSMUSG00000019997/ENSMUSG00000024427/ENSMUSG00000055333/ENSMUSG00000042812/ENSMUSG00000043733/ENSMUSG00000022783/ENSMUSG00000025810/ENSMUSG00000014599/ENSMUSG00000057329/…	193
GO:0009799	specification of symmetry	82/7747	129/16212	0.635659	1.33023	3.60237	0.00021169	0.00346188	0.00244938	ENSMUSG00000006932/ENSMUSG00000018395/ENSMUSG00000021109/ENSMUSG00000021944/ENSMUSG00000005583/ENSMUSG00000039910/ENSMUSG00000028576/ENSMUSG00000030513/ENSMUSG00000030201/ENSMUSG00000042812/ENSMUSG00000019969/ENSMUSG00000024253/ENSMUSG00000014426/ENSMUSG00000026679/ENSMUSG00000061802/ENSMUSG00000018604/ENSMUSG00000014329/ENSMUSG00000071350/ENSMUSG00000028023/ENSMUSG00000015605/ENSMUSG00000038122/…	82
GO:0009855	determination of bilateral symmetry	82/7747	129/16212	0.635659	1.33023	3.60237	0.00021169	0.00346188	0.00244938	ENSMUSG00000006932/ENSMUSG00000018395/ENSMUSG00000021109/ENSMUSG00000021944/ENSMUSG00000005583/ENSMUSG00000039910/ENSMUSG00000028576/ENSMUSG00000030513/ENSMUSG00000030201/ENSMUSG00000042812/ENSMUSG00000019969/ENSMUSG00000024253/ENSMUSG00000014426/ENSMUSG00000026679/ENSMUSG00000061802/ENSMUSG00000018604/ENSMUSG00000014329/ENSMUSG00000071350/ENSMUSG00000028023/ENSMUSG00000015605/ENSMUSG00000038122/…	82
GO:0002011	morphogenesis of an epithelial sheet	45/7747	64/16212	0.703125	1.47142	3.61488	0.000214709	0.00350201	0.00247777	ENSMUSG00000033149/ENSMUSG00000027356/ENSMUSG00000024486/ENSMUSG00000030201/ENSMUSG00000008999/ENSMUSG00000041225/ENSMUSG00000002233/ENSMUSG00000051379/ENSMUSG00000015605/ENSMUSG00000027276/ENSMUSG00000021754/ENSMUSG00000031328/ENSMUSG00000000555/ENSMUSG00000000530/ENSMUSG00000020888/ENSMUSG00000003534/ENSMUSG00000025199/ENSMUSG00000027835/ENSMUSG00000064302/ENSMUSG00000045039/ENSMUSG00000066043/…	45
GO:0051147	regulation of muscle cell differentiation	93/7747	149/16212	0.624161	1.30617	3.59171	0.000217462	0.0035376	0.00250296	ENSMUSG00000022812/ENSMUSG00000031681/ENSMUSG00000027358/ENSMUSG00000005583/ENSMUSG00000024454/ENSMUSG00000024431/ENSMUSG00000024621/ENSMUSG00000028291/ENSMUSG00000027510/ENSMUSG00000006818/ENSMUSG00000024238/ENSMUSG00000024240/ENSMUSG00000055027/ENSMUSG00000057329/ENSMUSG00000067336/ENSMUSG00000031441/ENSMUSG00000041075/ENSMUSG00000036023/ENSMUSG00000025172/ENSMUSG00000054675/ENSMUSG00000020644/…	93
GO:0007269	neurotransmitter secretion	99/7747	160/16212	0.61875	1.29485	3.5855	0.00022115	0.00356561	0.00252277	ENSMUSG00000027765/ENSMUSG00000022829/ENSMUSG00000030247/ENSMUSG00000005583/ENSMUSG00000053025/ENSMUSG00000032776/ENSMUSG00000029468/ENSMUSG00000029467/ENSMUSG00000024617/ENSMUSG00000030337/ENSMUSG00000030172/ENSMUSG00000022462/ENSMUSG00000029608/ENSMUSG00000019969/ENSMUSG00000033419/ENSMUSG00000027524/ENSMUSG00000024127/ENSMUSG00000027859/ENSMUSG00000027895/ENSMUSG00000022789/ENSMUSG00000029420/…	99
GO:0010594	regulation of endothelial cell migration	99/7747	160/16212	0.61875	1.29485	3.5855	0.00022115	0.00356561	0.00252277	ENSMUSG00000000600/ENSMUSG00000031714/ENSMUSG00000001729/ENSMUSG00000021109/ENSMUSG00000005583/ENSMUSG00000029470/ENSMUSG00000036585/ENSMUSG00000021256/ENSMUSG00000033960/ENSMUSG00000025810/ENSMUSG00000022475/ENSMUSG00000003032/ENSMUSG00000016128/ENSMUSG00000026822/ENSMUSG00000029838/ENSMUSG00000062352/ENSMUSG00000028017/ENSMUSG00000020700/ENSMUSG00000023951/ENSMUSG00000021701/ENSMUSG00000028643/…	99
GO:0099643	signal release from synapse	99/7747	160/16212	0.61875	1.29485	3.5855	0.00022115	0.00356561	0.00252277	ENSMUSG00000027765/ENSMUSG00000022829/ENSMUSG00000030247/ENSMUSG00000005583/ENSMUSG00000053025/ENSMUSG00000032776/ENSMUSG00000029468/ENSMUSG00000029467/ENSMUSG00000024617/ENSMUSG00000030337/ENSMUSG00000030172/ENSMUSG00000022462/ENSMUSG00000029608/ENSMUSG00000019969/ENSMUSG00000033419/ENSMUSG00000027524/ENSMUSG00000024127/ENSMUSG00000027859/ENSMUSG00000027895/ENSMUSG00000022789/ENSMUSG00000029420/…	99
GO:0048736	appendage development	118/7747	195/16212	0.605128	1.26634	3.5795	0.00022206	0.00356561	0.00252277	ENSMUSG00000022510/ENSMUSG00000027763/ENSMUSG00000020128/ENSMUSG00000006932/ENSMUSG00000027737/ENSMUSG00000021136/ENSMUSG00000030201/ENSMUSG00000019969/ENSMUSG00000027523/ENSMUSG00000008999/ENSMUSG00000024247/ENSMUSG00000018604/ENSMUSG00000022483/ENSMUSG00000067336/ENSMUSG00000021466/ENSMUSG00000029513/ENSMUSG00000021464/ENSMUSG00000028023/ENSMUSG00000020758/ENSMUSG00000039153/ENSMUSG00000027253/…	118
GO:0060173	limb development	118/7747	195/16212	0.605128	1.26634	3.5795	0.00022206	0.00356561	0.00252277	ENSMUSG00000022510/ENSMUSG00000027763/ENSMUSG00000020128/ENSMUSG00000006932/ENSMUSG00000027737/ENSMUSG00000021136/ENSMUSG00000030201/ENSMUSG00000019969/ENSMUSG00000027523/ENSMUSG00000008999/ENSMUSG00000024247/ENSMUSG00000018604/ENSMUSG00000022483/ENSMUSG00000067336/ENSMUSG00000021466/ENSMUSG00000029513/ENSMUSG00000021464/ENSMUSG00000028023/ENSMUSG00000020758/ENSMUSG00000039153/ENSMUSG00000027253/…	118
GO:0042157	lipoprotein metabolic process	56/7747	83/16212	0.674699	1.41193	3.59929	0.000223256	0.00357555	0.00252981	ENSMUSG00000036304/ENSMUSG00000033157/ENSMUSG00000026643/ENSMUSG00000025786/ENSMUSG00000021096/ENSMUSG00000031823/ENSMUSG00000048483/ENSMUSG00000061130/ENSMUSG00000034265/ENSMUSG00000040396/ENSMUSG00000028403/ENSMUSG00000000301/ENSMUSG00000047368/ENSMUSG00000028657/ENSMUSG00000027244/ENSMUSG00000025173/ENSMUSG00000041895/ENSMUSG00000037204/ENSMUSG00000002985/ENSMUSG00000002992/ENSMUSG00000059201/…	56
GO:0042472	inner ear morphogenesis	73/7747	113/16212	0.646018	1.35191	3.59111	0.000223839	0.00357565	0.00252988	ENSMUSG00000005917/ENSMUSG00000026768/ENSMUSG00000051367/ENSMUSG00000027966/ENSMUSG00000015134/ENSMUSG00000024497/ENSMUSG00000032419/ENSMUSG00000024238/ENSMUSG00000018604/ENSMUSG00000026976/ENSMUSG00000022483/ENSMUSG00000022114/ENSMUSG00000021464/ENSMUSG00000048707/ENSMUSG00000001052/ENSMUSG00000020733/ENSMUSG00000045288/ENSMUSG00000023972/ENSMUSG00000024424/ENSMUSG00000033577/ENSMUSG00000006269/…	73
GO:0007044	cell-substrate junction assembly	60/7747	90/16212	0.666667	1.39512	3.59584	0.000224587	0.00357838	0.00253181	ENSMUSG00000033149/ENSMUSG00000043733/ENSMUSG00000025810/ENSMUSG00000057329/ENSMUSG00000019920/ENSMUSG00000004530/ENSMUSG00000031480/ENSMUSG00000062352/ENSMUSG00000020758/ENSMUSG00000023951/ENSMUSG00000040690/ENSMUSG00000025314/ENSMUSG00000052504/ENSMUSG00000024421/ENSMUSG00000021823/ENSMUSG00000031342/ENSMUSG00000031355/ENSMUSG00000059981/ENSMUSG00000000555/ENSMUSG00000000530/ENSMUSG00000030536/…	60
GO:0007416	synapse assembly	158/7747	270/16212	0.585185	1.22461	3.56033	0.000231825	0.00367513	0.00260026	ENSMUSG00000022514/ENSMUSG00000022812/ENSMUSG00000022790/ENSMUSG00000022656/ENSMUSG00000020458/ENSMUSG00000049630/ENSMUSG00000044674/ENSMUSG00000006932/ENSMUSG00000051367/ENSMUSG00000021057/ENSMUSG00000030247/ENSMUSG00000005583/ENSMUSG00000025789/ENSMUSG00000060275/ENSMUSG00000063870/ENSMUSG00000008153/ENSMUSG00000042589/ENSMUSG00000055003/ENSMUSG00000042700/ENSMUSG00000035274/ENSMUSG00000024146/…	158
GO:0045017	glycerolipid biosynthetic process	119/7747	197/16212	0.604061	1.26411	3.56786	0.000231845	0.00367513	0.00260026	ENSMUSG00000037936/ENSMUSG00000037526/ENSMUSG00000004270/ENSMUSG00000058979/ENSMUSG00000027513/ENSMUSG00000036918/ENSMUSG00000023827/ENSMUSG00000075703/ENSMUSG00000026737/ENSMUSG00000040774/ENSMUSG00000055912/ENSMUSG00000000301/ENSMUSG00000020538/ENSMUSG00000024867/ENSMUSG00000025178/ENSMUSG00000020593/ENSMUSG00000028655/ENSMUSG00000002108/ENSMUSG00000040479/ENSMUSG00000027531/ENSMUSG00000028773/…	119
GO:0062197	cellular response to chemical stress	177/7747	306/16212	0.578431	1.21047	3.55577	0.000233316	0.00368902	0.00261008	ENSMUSG00000026277/ENSMUSG00000020283/ENSMUSG00000064090/ENSMUSG00000020464/ENSMUSG00000031616/ENSMUSG00000027737/ENSMUSG00000001729/ENSMUSG00000021109/ENSMUSG00000041671/ENSMUSG00000030249/ENSMUSG00000019850/ENSMUSG00000071369/ENSMUSG00000075701/ENSMUSG00000029467/ENSMUSG00000033871/ENSMUSG00000024620/ENSMUSG00000005069/ENSMUSG00000030189/ENSMUSG00000045962/ENSMUSG00000030166/ENSMUSG00000021215/…	177
GO:0008015	blood circulation	268/7747	481/16212	0.557173	1.16598	3.53525	0.000243142	0.0038346	0.00271309	ENSMUSG00000022875/ENSMUSG00000027765/ENSMUSG00000051980/ENSMUSG00000003161/ENSMUSG00000031616/ENSMUSG00000001729/ENSMUSG00000021270/ENSMUSG00000021109/ENSMUSG00000021944/ENSMUSG00000041741/ENSMUSG00000030247/ENSMUSG00000030249/ENSMUSG00000023845/ENSMUSG00000019997/ENSMUSG00000030557/ENSMUSG00000030516/ENSMUSG00000028172/ENSMUSG00000029470/ENSMUSG00000024486/ENSMUSG00000029467/ENSMUSG00000024431/…	268
GO:0051098	regulation of binding	170/7747	293/16212	0.580205	1.21418	3.53932	0.000249104	0.00391036	0.00276669	ENSMUSG00000032409/ENSMUSG00000049502/ENSMUSG00000022812/ENSMUSG00000003161/ENSMUSG00000000600/ENSMUSG00000001729/ENSMUSG00000007411/ENSMUSG00000044548/ENSMUSG00000000915/ENSMUSG00000027358/ENSMUSG00000028300/ENSMUSG00000070509/ENSMUSG00000029467/ENSMUSG00000035842/ENSMUSG00000006585/ENSMUSG00000019969/ENSMUSG00000027859/ENSMUSG00000008730/ENSMUSG00000031668/ENSMUSG00000022125/ENSMUSG00000048349/…	170
GO:0032869	cellular response to insulin stimulus	128/7747	214/16212	0.598131	1.2517	3.54577	0.000250048	0.00391036	0.00276669	ENSMUSG00000047443/ENSMUSG00000022812/ENSMUSG00000045658/ENSMUSG00000001729/ENSMUSG00000026778/ENSMUSG00000019970/ENSMUSG00000024353/ENSMUSG00000031823/ENSMUSG00000043733/ENSMUSG00000027513/ENSMUSG00000024143/ENSMUSG00000026737/ENSMUSG00000033083/ENSMUSG00000022111/ENSMUSG00000038894/ENSMUSG00000069805/ENSMUSG00000038024/ENSMUSG00000020538/ENSMUSG00000032702/ENSMUSG00000025190/ENSMUSG00000032350/…	128
GO:0006486	protein glycosylation	114/7747	188/16212	0.606383	1.26897	3.54854	0.00025047	0.00391036	0.00276669	ENSMUSG00000034064/ENSMUSG00000022793/ENSMUSG00000051650/ENSMUSG00000003418/ENSMUSG00000031712/ENSMUSG00000029431/ENSMUSG00000030283/ENSMUSG00000025789/ENSMUSG00000019969/ENSMUSG00000056131/ENSMUSG00000028277/ENSMUSG00000031749/ENSMUSG00000056091/ENSMUSG00000036197/ENSMUSG00000024172/ENSMUSG00000028413/ENSMUSG00000036646/ENSMUSG00000026944/ENSMUSG00000024064/ENSMUSG00000037470/ENSMUSG00000034832/…	114
GO:0043413	macromolecule glycosylation	114/7747	188/16212	0.606383	1.26897	3.54854	0.00025047	0.00391036	0.00276669	ENSMUSG00000034064/ENSMUSG00000022793/ENSMUSG00000051650/ENSMUSG00000003418/ENSMUSG00000031712/ENSMUSG00000029431/ENSMUSG00000030283/ENSMUSG00000025789/ENSMUSG00000019969/ENSMUSG00000056131/ENSMUSG00000028277/ENSMUSG00000031749/ENSMUSG00000056091/ENSMUSG00000036197/ENSMUSG00000024172/ENSMUSG00000028413/ENSMUSG00000036646/ENSMUSG00000026944/ENSMUSG00000024064/ENSMUSG00000037470/ENSMUSG00000034832/…	114
GO:0070936	protein K48-linked ubiquitination	57/7747	85/16212	0.670588	1.40333	3.56655	0.000252612	0.00393389	0.00278334	ENSMUSG00000049502/ENSMUSG00000019850/ENSMUSG00000029474/ENSMUSG00000020794/ENSMUSG00000029472/ENSMUSG00000091896/ENSMUSG00000029466/ENSMUSG00000001472/ENSMUSG00000024370/ENSMUSG00000019927/ENSMUSG00000047496/ENSMUSG00000038416/ENSMUSG00000036241/ENSMUSG00000001366/ENSMUSG00000026946/ENSMUSG00000026965/ENSMUSG00000039159/ENSMUSG00000054517/ENSMUSG00000035048/ENSMUSG00000020107/ENSMUSG00000026429/…	57
GO:0045600	positive regulation of fat cell differentiation	46/7747	66/16212	0.69697	1.45854	3.57084	0.000254123	0.00394751	0.00279297	ENSMUSG00000025958/ENSMUSG00000023087/ENSMUSG00000001729/ENSMUSG00000044548/ENSMUSG00000051367/ENSMUSG00000027358/ENSMUSG00000032652/ENSMUSG00000030170/ENSMUSG00000008999/ENSMUSG00000022111/ENSMUSG00000042190/ENSMUSG00000026676/ENSMUSG00000014547/ENSMUSG00000020644/ENSMUSG00000001334/ENSMUSG00000043252/ENSMUSG00000031357/ENSMUSG00000039208/ENSMUSG00000000142/ENSMUSG00000000552/ENSMUSG00000029330/…	46
GO:0036293	response to decreased oxygen levels	181/7747	314/16212	0.576433	1.20629	3.53127	0.000255224	0.0039547	0.00279806	ENSMUSG00000051980/ENSMUSG00000051355/ENSMUSG00000020458/ENSMUSG00000031616/ENSMUSG00000037161/ENSMUSG00000001729/ENSMUSG00000079055/ENSMUSG00000021109/ENSMUSG00000027358/ENSMUSG00000030247/ENSMUSG00000030249/ENSMUSG00000030287/ENSMUSG00000039910/ENSMUSG00000003031/ENSMUSG00000021032/ENSMUSG00000021253/ENSMUSG00000004791/ENSMUSG00000027513/ENSMUSG00000024140/ENSMUSG00000071984/ENSMUSG00000006818/…	181
GO:0006836	neurotransmitter transport	129/7747	216/16212	0.597222	1.2498	3.53561	0.000259544	0.00401161	0.00283833	ENSMUSG00000027765/ENSMUSG00000022829/ENSMUSG00000026317/ENSMUSG00000030247/ENSMUSG00000005583/ENSMUSG00000053025/ENSMUSG00000032776/ENSMUSG00000029468/ENSMUSG00000029467/ENSMUSG00000052026/ENSMUSG00000024617/ENSMUSG00000030337/ENSMUSG00000030109/ENSMUSG00000030172/ENSMUSG00000022462/ENSMUSG00000029608/ENSMUSG00000019969/ENSMUSG00000033419/ENSMUSG00000027524/ENSMUSG00000024127/ENSMUSG00000023828/…	129
GO:0006984	ER-nucleus signaling pathway	31/7747	41/16212	0.756098	1.58227	3.57114	0.000261515	0.00403201	0.00285276	ENSMUSG00000026278/ENSMUSG00000022812/ENSMUSG00000075701/ENSMUSG00000029467/ENSMUSG00000004446/ENSMUSG00000031668/ENSMUSG00000032840/ENSMUSG00000020538/ENSMUSG00000078622/ENSMUSG00000032475/ENSMUSG00000059552/ENSMUSG00000015461/ENSMUSG00000025198/ENSMUSG00000052428/ENSMUSG00000031751/ENSMUSG00000025408/ENSMUSG00000037720/ENSMUSG00000031483/ENSMUSG00000027381/ENSMUSG00000015839/ENSMUSG00000020581/…	31
GO:0090140	regulation of mitochondrial fission	26/7747	33/16212	0.787879	1.64878	3.56891	0.000264671	0.00407055	0.00288003	ENSMUSG00000037679/ENSMUSG00000031730/ENSMUSG00000022789/ENSMUSG00000018599/ENSMUSG00000039428/ENSMUSG00000009647/ENSMUSG00000029500/ENSMUSG00000019054/ENSMUSG00000031696/ENSMUSG00000040033/ENSMUSG00000061313/ENSMUSG00000062960/ENSMUSG00000005131/ENSMUSG00000019929/ENSMUSG00000023307/ENSMUSG00000028756/ENSMUSG00000041241/ENSMUSG00000029020/ENSMUSG00000008859/ENSMUSG00000022412/ENSMUSG00000020527/…	26
GO:1903078	positive regulation of protein localization to plasma membrane	43/7747	61/16212	0.704918	1.47517	3.5569	0.000269876	0.00414033	0.0029294	ENSMUSG00000051355/ENSMUSG00000020315/ENSMUSG00000001729/ENSMUSG00000021057/ENSMUSG00000052397/ENSMUSG00000006740/ENSMUSG00000052504/ENSMUSG00000038976/ENSMUSG00000001507/ENSMUSG00000026413/ENSMUSG00000079037/ENSMUSG00000032290/ENSMUSG00000029032/ENSMUSG00000020372/ENSMUSG00000036968/ENSMUSG00000073982/ENSMUSG00000049493/ENSMUSG00000032883/ENSMUSG00000040249/ENSMUSG00000044147/ENSMUSG00000050335/…	43
GO:0031396	regulation of protein ubiquitination	116/7747	192/16212	0.604167	1.26433	3.52469	0.000273364	0.00418348	0.00295993	ENSMUSG00000049502/ENSMUSG00000022812/ENSMUSG00000051355/ENSMUSG00000006932/ENSMUSG00000001729/ENSMUSG00000021270/ENSMUSG00000055884/ENSMUSG00000074794/ENSMUSG00000019850/ENSMUSG00000028577/ENSMUSG00000024454/ENSMUSG00000024425/ENSMUSG00000057719/ENSMUSG00000024101/ENSMUSG00000045962/ENSMUSG00000001472/ENSMUSG00000019969/ENSMUSG00000022674/ENSMUSG00000026739/ENSMUSG00000026779/ENSMUSG00000027859/…	116
GO:0048489	synaptic vesicle transport	34/7747	46/16212	0.73913	1.54676	3.55252	0.000279888	0.00424925	0.00300647	ENSMUSG00000014602/ENSMUSG00000006932/ENSMUSG00000042992/ENSMUSG00000033419/ENSMUSG00000006740/ENSMUSG00000024480/ENSMUSG00000040687/ENSMUSG00000021824/ENSMUSG00000031367/ENSMUSG00000027341/ENSMUSG00000018566/ENSMUSG00000003872/ENSMUSG00000036273/ENSMUSG00000022973/ENSMUSG00000026825/ENSMUSG00000026849/ENSMUSG00000024261/ENSMUSG00000090247/ENSMUSG00000074657/ENSMUSG00000031539/ENSMUSG00000038982/…	34
GO:0051099	positive regulation of binding	86/7747	137/16212	0.627737	1.31365	3.5269	0.000280136	0.00424925	0.00300647	ENSMUSG00000049502/ENSMUSG00000022812/ENSMUSG00000000600/ENSMUSG00000007411/ENSMUSG00000044548/ENSMUSG00000000915/ENSMUSG00000027358/ENSMUSG00000035842/ENSMUSG00000006585/ENSMUSG00000027859/ENSMUSG00000008730/ENSMUSG00000031668/ENSMUSG00000022125/ENSMUSG00000048349/ENSMUSG00000029550/ENSMUSG00000015092/ENSMUSG00000061436/ENSMUSG00000022105/ENSMUSG00000028023/ENSMUSG00000028017/ENSMUSG00000041135/…	86
GO:0048705	skeletal system morphogenesis	139/7747	235/16212	0.591489	1.2378	3.5128	0.000280458	0.00424925	0.00300647	ENSMUSG00000006932/ENSMUSG00000064325/ENSMUSG00000051367/ENSMUSG00000027966/ENSMUSG00000005583/ENSMUSG00000039910/ENSMUSG00000020003/ENSMUSG00000019997/ENSMUSG00000032640/ENSMUSG00000029468/ENSMUSG00000033871/ENSMUSG00000024620/ENSMUSG00000054008/ENSMUSG00000030201/ENSMUSG00000035569/ENSMUSG00000003316/ENSMUSG00000021253/ENSMUSG00000019969/ENSMUSG00000027523/ENSMUSG00000008999/ENSMUSG00000026739/…	139
GO:0043536	positive regulation of blood vessel endothelial cell migration	40/7747	56/16212	0.714286	1.49477	3.54806	0.000281089	0.00424925	0.00300647	ENSMUSG00000031714/ENSMUSG00000001729/ENSMUSG00000021109/ENSMUSG00000029470/ENSMUSG00000033960/ENSMUSG00000025810/ENSMUSG00000022475/ENSMUSG00000020700/ENSMUSG00000023951/ENSMUSG00000021701/ENSMUSG00000048373/ENSMUSG00000050965/ENSMUSG00000001280/ENSMUSG00000000320/ENSMUSG00000041187/ENSMUSG00000013076/ENSMUSG00000001435/ENSMUSG00000066551/ENSMUSG00000020063/ENSMUSG00000004951/ENSMUSG00000017652/…	40
GO:0051489	regulation of filopodium assembly	40/7747	56/16212	0.714286	1.49477	3.54806	0.000281089	0.00424925	0.00300647	ENSMUSG00000026778/ENSMUSG00000024501/ENSMUSG00000021253/ENSMUSG00000024143/ENSMUSG00000025810/ENSMUSG00000022272/ENSMUSG00000015605/ENSMUSG00000039735/ENSMUSG00000038827/ENSMUSG00000007613/ENSMUSG00000037754/ENSMUSG00000009292/ENSMUSG00000040260/ENSMUSG00000064181/ENSMUSG00000026304/ENSMUSG00000073878/ENSMUSG00000044147/ENSMUSG00000022099/ENSMUSG00000036006/ENSMUSG00000001847/ENSMUSG00000029581/…	40
GO:0055017	cardiac muscle tissue growth	71/7747	110/16212	0.645455	1.35073	3.53092	0.000282024	0.004253	0.00300912	ENSMUSG00000022812/ENSMUSG00000020160/ENSMUSG00000006932/ENSMUSG00000031681/ENSMUSG00000021944/ENSMUSG00000005583/ENSMUSG00000039910/ENSMUSG00000066406/ENSMUSG00000036585/ENSMUSG00000024431/ENSMUSG00000052920/ENSMUSG00000036023/ENSMUSG00000005836/ENSMUSG00000059743/ENSMUSG00000020612/ENSMUSG00000031400/ENSMUSG00000053819/ENSMUSG00000031626/ENSMUSG00000031633/ENSMUSG00000020900/ENSMUSG00000019432/…	71
GO:0040013	negative regulation of locomotion	186/7747	324/16212	0.574074	1.20135	3.50232	0.000283557	0.00426575	0.00301814	ENSMUSG00000036894/ENSMUSG00000022812/ENSMUSG00000033149/ENSMUSG00000000600/ENSMUSG00000001729/ENSMUSG00000021262/ENSMUSG00000048118/ENSMUSG00000074794/ENSMUSG00000005583/ENSMUSG00000039910/ENSMUSG00000024501/ENSMUSG00000030168/ENSMUSG00000019278/ENSMUSG00000001672/ENSMUSG00000021256/ENSMUSG00000025810/ENSMUSG00000036564/ENSMUSG00000031785/ENSMUSG00000026981/ENSMUSG00000052920/ENSMUSG00000057329/…	186
GO:0051588	regulation of neurotransmitter transport	76/7747	119/16212	0.638655	1.3365	3.52453	0.000286631	0.00430154	0.00304347	ENSMUSG00000027765/ENSMUSG00000022829/ENSMUSG00000005583/ENSMUSG00000053025/ENSMUSG00000032776/ENSMUSG00000029468/ENSMUSG00000029467/ENSMUSG00000024617/ENSMUSG00000022462/ENSMUSG00000027524/ENSMUSG00000024127/ENSMUSG00000027859/ENSMUSG00000027895/ENSMUSG00000029361/ENSMUSG00000022789/ENSMUSG00000100241/ENSMUSG00000017412/ENSMUSG00000004113/ENSMUSG00000061878/ENSMUSG00000032890/ENSMUSG00000041670/…	76
GO:0098917	retrograde trans-synaptic signaling	7747-11-01	11/16212	1	2.09268	3.46798	0.000295567	0.00442493	0.00313077	ENSMUSG00000044288/ENSMUSG00000051177/ENSMUSG00000033910/ENSMUSG00000024261/ENSMUSG00000032076/ENSMUSG00000049336/ENSMUSG00000025555/ENSMUSG00000039952/ENSMUSG00000033174/ENSMUSG00000025277/ENSMUSG00000063887	11
GO:0001708	cell fate specification	67/7747	103/16212	0.650485	1.36126	3.51853	0.000297428	0.00443139	0.00313533	ENSMUSG00000006932/ENSMUSG00000051367/ENSMUSG00000045591/ENSMUSG00000063870/ENSMUSG00000030353/ENSMUSG00000034258/ENSMUSG00000019969/ENSMUSG00000032419/ENSMUSG00000055817/ENSMUSG00000018604/ENSMUSG00000048349/ENSMUSG00000021466/ENSMUSG00000041075/ENSMUSG00000042372/ENSMUSG00000046470/ENSMUSG00000057236/ENSMUSG00000042258/ENSMUSG00000021095/ENSMUSG00000031353/ENSMUSG00000030699/ENSMUSG00000024406/…	67
GO:0001942	hair follicle development	67/7747	103/16212	0.650485	1.36126	3.51853	0.000297428	0.00443139	0.00313533	ENSMUSG00000022510/ENSMUSG00000006932/ENSMUSG00000001729/ENSMUSG00000027356/ENSMUSG00000061048/ENSMUSG00000019969/ENSMUSG00000027523/ENSMUSG00000028640/ENSMUSG00000057329/ENSMUSG00000003227/ENSMUSG00000028403/ENSMUSG00000046470/ENSMUSG00000043207/ENSMUSG00000027253/ENSMUSG00000070990/ENSMUSG00000039706/ENSMUSG00000035557/ENSMUSG00000001751/ENSMUSG00000001655/ENSMUSG00000000532/ENSMUSG00000030400/…	67
GO:0010970	transport along microtubule	105/7747	172/16212	0.610465	1.27751	3.50023	0.000302633	0.00449801	0.00318247	ENSMUSG00000014602/ENSMUSG00000020149/ENSMUSG00000032536/ENSMUSG00000037161/ENSMUSG00000018395/ENSMUSG00000021288/ENSMUSG00000018707/ENSMUSG00000021076/ENSMUSG00000021109/ENSMUSG00000028576/ENSMUSG00000043991/ENSMUSG00000029469/ENSMUSG00000042992/ENSMUSG00000000738/ENSMUSG00000031921/ENSMUSG00000032258/ENSMUSG00000024253/ENSMUSG00000036591/ENSMUSG00000006740/ENSMUSG00000069601/ENSMUSG00000020132/…	105
GO:1901888	regulation of cell junction assembly	159/7747	273/16212	0.582418	1.21881	3.48806	0.00030335	0.00449801	0.00318247	ENSMUSG00000022514/ENSMUSG00000022812/ENSMUSG00000022790/ENSMUSG00000033149/ENSMUSG00000022656/ENSMUSG00000020458/ENSMUSG00000044674/ENSMUSG00000006932/ENSMUSG00000051367/ENSMUSG00000005583/ENSMUSG00000025789/ENSMUSG00000030516/ENSMUSG00000060275/ENSMUSG00000063870/ENSMUSG00000008153/ENSMUSG00000042589/ENSMUSG00000055003/ENSMUSG00000043733/ENSMUSG00000042700/ENSMUSG00000035274/ENSMUSG00000024146/…	159
GO:0060996	dendritic spine development	82/7747	130/16212	0.630769	1.32	3.50436	0.000306385	0.0045082	0.00318968	ENSMUSG00000014602/ENSMUSG00000027770/ENSMUSG00000020152/ENSMUSG00000005583/ENSMUSG00000024431/ENSMUSG00000024617/ENSMUSG00000042589/ENSMUSG00000019969/ENSMUSG00000042700/ENSMUSG00000069729/ENSMUSG00000026782/ENSMUSG00000020476/ENSMUSG00000037855/ENSMUSG00000030309/ENSMUSG00000022789/ENSMUSG00000053580/ENSMUSG00000021701/ENSMUSG00000052135/ENSMUSG00000021782/ENSMUSG00000030602/ENSMUSG00000020886/…	82
GO:0030336	negative regulation of cell migration	169/7747	292/16212	0.578767	1.21117	3.48354	0.000306676	0.0045082	0.00318968	ENSMUSG00000036894/ENSMUSG00000022812/ENSMUSG00000033149/ENSMUSG00000000600/ENSMUSG00000001729/ENSMUSG00000021262/ENSMUSG00000048118/ENSMUSG00000005583/ENSMUSG00000039910/ENSMUSG00000024501/ENSMUSG00000030168/ENSMUSG00000019278/ENSMUSG00000001672/ENSMUSG00000021256/ENSMUSG00000036564/ENSMUSG00000031785/ENSMUSG00000026981/ENSMUSG00000052920/ENSMUSG00000057329/ENSMUSG00000039985/ENSMUSG00000041957/…	169
GO:0048661	positive regulation of smooth muscle cell proliferation	72/7747	112/16212	0.642857	1.34529	3.50788	0.000306947	0.0045082	0.00318968	ENSMUSG00000022812/ENSMUSG00000038845/ENSMUSG00000001729/ENSMUSG00000021109/ENSMUSG00000071369/ENSMUSG00000019982/ENSMUSG00000024486/ENSMUSG00000024620/ENSMUSG00000006519/ENSMUSG00000028284/ENSMUSG00000038418/ENSMUSG00000000001/ENSMUSG00000020644/ENSMUSG00000020715/ENSMUSG00000023951/ENSMUSG00000021699/ENSMUSG00000048001/ENSMUSG00000050965/ENSMUSG00000053819/ENSMUSG00000000320/ENSMUSG00000019432/…	72
GO:1905037	autophagosome organization	72/7747	112/16212	0.642857	1.34529	3.50788	0.000306947	0.0045082	0.00318968	ENSMUSG00000026280/ENSMUSG00000020149/ENSMUSG00000028080/ENSMUSG00000037526/ENSMUSG00000028300/ENSMUSG00000029467/ENSMUSG00000030161/ENSMUSG00000031950/ENSMUSG00000019969/ENSMUSG00000026737/ENSMUSG00000040412/ENSMUSG00000049323/ENSMUSG00000027244/ENSMUSG00000040506/ENSMUSG00000020952/ENSMUSG00000025173/ENSMUSG00000104158/ENSMUSG00000032308/ENSMUSG00000041895/ENSMUSG00000037204/ENSMUSG00000019518/…	72
GO:0007368	determination of left/right symmetry	77/7747	121/16212	0.636364	1.33171	3.50359	0.00030949	0.0045244	0.00320114	ENSMUSG00000018395/ENSMUSG00000021109/ENSMUSG00000021944/ENSMUSG00000005583/ENSMUSG00000039910/ENSMUSG00000028576/ENSMUSG00000030513/ENSMUSG00000030201/ENSMUSG00000042812/ENSMUSG00000019969/ENSMUSG00000024253/ENSMUSG00000026679/ENSMUSG00000061802/ENSMUSG00000018604/ENSMUSG00000014329/ENSMUSG00000071350/ENSMUSG00000028023/ENSMUSG00000015605/ENSMUSG00000038122/ENSMUSG00000040929/ENSMUSG00000024294/…	77
GO:0001649	osteoblast differentiation	119/7747	198/16212	0.60101	1.25772	3.49054	0.00030951	0.0045244	0.00320114	ENSMUSG00000022510/ENSMUSG00000047443/ENSMUSG00000022812/ENSMUSG00000044674/ENSMUSG00000040274/ENSMUSG00000006932/ENSMUSG00000031681/ENSMUSG00000023087/ENSMUSG00000001729/ENSMUSG00000021136/ENSMUSG00000027358/ENSMUSG00000005583/ENSMUSG00000032265/ENSMUSG00000028284/ENSMUSG00000027523/ENSMUSG00000008999/ENSMUSG00000022475/ENSMUSG00000048776/ENSMUSG00000067336/ENSMUSG00000021466/ENSMUSG00000026668/…	119
GO:0043484	regulation of RNA splicing	106/7747	174/16212	0.609195	1.27485	3.48703	0.00031747	0.00462391	0.00327155	ENSMUSG00000027763/ENSMUSG00000022185/ENSMUSG00000064138/ENSMUSG00000024604/ENSMUSG00000021210/ENSMUSG00000022462/ENSMUSG00000010608/ENSMUSG00000027510/ENSMUSG00000060475/ENSMUSG00000062078/ENSMUSG00000022120/ENSMUSG00000038398/ENSMUSG00000063919/ENSMUSG00000029538/ENSMUSG00000026034/ENSMUSG00000020715/ENSMUSG00000028790/ENSMUSG00000043962/ENSMUSG00000005506/ENSMUSG00000028409/ENSMUSG00000028330/…	106
GO:0006873	intracellular monoatomic ion homeostasis	277/7747	500/16212	0.554	1.15935	3.46232	0.00031781	0.00462391	0.00327155	ENSMUSG00000026278/ENSMUSG00000047443/ENSMUSG00000027765/ENSMUSG00000051980/ENSMUSG00000052459/ENSMUSG00000020128/ENSMUSG00000051355/ENSMUSG00000003161/ENSMUSG00000015653/ENSMUSG00000038023/ENSMUSG00000031616/ENSMUSG00000031684/ENSMUSG00000001270/ENSMUSG00000037904/ENSMUSG00000079055/ENSMUSG00000021109/ENSMUSG00000029434/ENSMUSG00000030287/ENSMUSG00000019970/ENSMUSG00000053025/ENSMUSG00000029468/…	277
GO:0022411	cellular component disassembly	218/7747	386/16212	0.564767	1.18188	3.45974	0.000327159	0.00473776	0.0033521	ENSMUSG00000032409/ENSMUSG00000026278/ENSMUSG00000020128/ENSMUSG00000020459/ENSMUSG00000020315/ENSMUSG00000047635/ENSMUSG00000058355/ENSMUSG00000021288/ENSMUSG00000021262/ENSMUSG00000037526/ENSMUSG00000021057/ENSMUSG00000059970/ENSMUSG00000023106/ENSMUSG00000021061/ENSMUSG00000029434/ENSMUSG00000022185/ENSMUSG00000019977/ENSMUSG00000019970/ENSMUSG00000019997/ENSMUSG00000029467/ENSMUSG00000060450/…	218
GO:0010948	negative regulation of cell cycle process	162/7747	279/16212	0.580645	1.21511	3.46707	0.000327164	0.00473776	0.0033521	ENSMUSG00000032409/ENSMUSG00000049502/ENSMUSG00000016984/ENSMUSG00000032555/ENSMUSG00000020380/ENSMUSG00000017843/ENSMUSG00000044548/ENSMUSG00000029414/ENSMUSG00000052934/ENSMUSG00000006585/ENSMUSG00000033596/ENSMUSG00000043733/ENSMUSG00000038379/ENSMUSG00000027510/ENSMUSG00000008999/ENSMUSG00000024151/ENSMUSG00000024283/ENSMUSG00000057329/ENSMUSG00000061288/ENSMUSG00000038542/ENSMUSG00000003032/…	162
GO:0032984	protein-containing complex disassembly	137/7747	232/16212	0.590517	1.23576	3.46012	0.000341198	0.00491801	0.00347964	ENSMUSG00000020315/ENSMUSG00000047635/ENSMUSG00000058355/ENSMUSG00000021288/ENSMUSG00000021262/ENSMUSG00000037526/ENSMUSG00000021057/ENSMUSG00000021061/ENSMUSG00000029434/ENSMUSG00000019970/ENSMUSG00000019997/ENSMUSG00000029467/ENSMUSG00000005069/ENSMUSG00000030161/ENSMUSG00000045962/ENSMUSG00000051586/ENSMUSG00000031950/ENSMUSG00000032624/ENSMUSG00000040852/ENSMUSG00000024236/ENSMUSG00000006740/…	137
GO:0048167	regulation of synaptic plasticity	137/7747	232/16212	0.590517	1.23576	3.46012	0.000341198	0.00491801	0.00347964	ENSMUSG00000025958/ENSMUSG00000022812/ENSMUSG00000022790/ENSMUSG00000021259/ENSMUSG00000079055/ENSMUSG00000021057/ENSMUSG00000030265/ENSMUSG00000023845/ENSMUSG00000005583/ENSMUSG00000037058/ENSMUSG00000024431/ENSMUSG00000024617/ENSMUSG00000043079/ENSMUSG00000025318/ENSMUSG00000019969/ENSMUSG00000042700/ENSMUSG00000038418/ENSMUSG00000003657/ENSMUSG00000037868/ENSMUSG00000029361/ENSMUSG00000100241/…	137
GO:0060412	ventricular septum morphogenesis	32/7747	43/16212	0.744186	1.55734	3.50086	0.000343277	0.0049365	0.00349272	ENSMUSG00000044674/ENSMUSG00000039910/ENSMUSG00000030201/ENSMUSG00000018604/ENSMUSG00000067336/ENSMUSG00000020644/ENSMUSG00000028023/ENSMUSG00000032744/ENSMUSG00000040289/ENSMUSG00000007613/ENSMUSG00000021796/ENSMUSG00000031558/ENSMUSG00000025880/ENSMUSG00000024515/ENSMUSG00000039191/ENSMUSG00000026923/ENSMUSG00000021835/ENSMUSG00000021067/ENSMUSG00000076431/ENSMUSG00000033016/ENSMUSG00000015957/…	32
GO:0045005	DNA-templated DNA replication maintenance of fidelity	35/7747	48/16212	0.729167	1.52591	3.49075	0.000354241	0.00508237	0.00359592	ENSMUSG00000032409/ENSMUSG00000034206/ENSMUSG00000016984/ENSMUSG00000020380/ENSMUSG00000055884/ENSMUSG00000035842/ENSMUSG00000033596/ENSMUSG00000037855/ENSMUSG00000041147/ENSMUSG00000038685/ENSMUSG00000019857/ENSMUSG00000058298/ENSMUSG00000028224/ENSMUSG00000041238/ENSMUSG00000027342/ENSMUSG00000039055/ENSMUSG00000039748/ENSMUSG00000045751/ENSMUSG00000036875/ENSMUSG00000022960/ENSMUSG00000009555/…	35
GO:0070050	neuron cellular homeostasis	52/7747	77/16212	0.675325	1.41324	3.47713	0.000357558	0.00510633	0.00361288	ENSMUSG00000027765/ENSMUSG00000052459/ENSMUSG00000053025/ENSMUSG00000029467/ENSMUSG00000030172/ENSMUSG00000019210/ENSMUSG00000019969/ENSMUSG00000044288/ENSMUSG00000000673/ENSMUSG00000003657/ENSMUSG00000052337/ENSMUSG00000027562/ENSMUSG00000029420/ENSMUSG00000017412/ENSMUSG00000039050/ENSMUSG00000026959/ENSMUSG00000038600/ENSMUSG00000004843/ENSMUSG00000024121/ENSMUSG00000006269/ENSMUSG00000019302/…	52
GO:2000736	regulation of stem cell differentiation	52/7747	77/16212	0.675325	1.41324	3.47713	0.000357558	0.00510633	0.00361288	ENSMUSG00000027770/ENSMUSG00000022812/ENSMUSG00000044674/ENSMUSG00000040274/ENSMUSG00000021258/ENSMUSG00000063870/ENSMUSG00000055817/ENSMUSG00000024359/ENSMUSG00000018604/ENSMUSG00000053470/ENSMUSG00000029655/ENSMUSG00000013465/ENSMUSG00000029838/ENSMUSG00000057236/ENSMUSG00000027276/ENSMUSG00000027282/ENSMUSG00000033706/ENSMUSG00000031353/ENSMUSG00000048001/ENSMUSG00000004040/ENSMUSG00000060284/…	52
GO:0006029	proteoglycan metabolic process	56/7747	84/16212	0.666667	1.39512	3.47326	0.0003596	0.00512169	0.00362374	ENSMUSG00000006932/ENSMUSG00000027966/ENSMUSG00000027358/ENSMUSG00000032640/ENSMUSG00000054008/ENSMUSG00000041372/ENSMUSG00000097084/ENSMUSG00000015027/ENSMUSG00000022483/ENSMUSG00000067336/ENSMUSG00000043587/ENSMUSG00000037089/ENSMUSG00000042042/ENSMUSG00000062329/ENSMUSG00000051022/ENSMUSG00000039308/ENSMUSG00000057337/ENSMUSG00000001751/ENSMUSG00000020868/ENSMUSG00000052430/ENSMUSG00000038702/…	56
GO:0014897	striated muscle hypertrophy	74/7747	116/16212	0.637931	1.33499	3.46382	0.000360286	0.00512169	0.00362374	ENSMUSG00000022812/ENSMUSG00000020160/ENSMUSG00000031681/ENSMUSG00000027358/ENSMUSG00000021944/ENSMUSG00000005583/ENSMUSG00000066406/ENSMUSG00000030557/ENSMUSG00000029470/ENSMUSG00000029467/ENSMUSG00000024431/ENSMUSG00000052920/ENSMUSG00000036023/ENSMUSG00000029840/ENSMUSG00000042010/ENSMUSG00000005836/ENSMUSG00000059743/ENSMUSG00000039197/ENSMUSG00000031068/ENSMUSG00000020580/ENSMUSG00000050965/…	74
GO:0032469	endoplasmic reticulum calcium ion homeostasis	20/7747	24/16212	0.833333	1.7439	3.48885	0.000361516	0.0051274	0.00362778	ENSMUSG00000029467/ENSMUSG00000019969/ENSMUSG00000027884/ENSMUSG00000057329/ENSMUSG00000078622/ENSMUSG00000030730/ENSMUSG00000053819/ENSMUSG00000057789/ENSMUSG00000052428/ENSMUSG00000022892/ENSMUSG00000031770/ENSMUSG00000021143/ENSMUSG00000022099/ENSMUSG00000028149/ENSMUSG00000041594/ENSMUSG00000030102/ENSMUSG00000042682/ENSMUSG00000033287/ENSMUSG00000022564/ENSMUSG00000039474	20
GO:0071900	regulation of protein serine/threonine kinase activity	139/7747	236/16212	0.588983	1.23255	3.44273	0.000363087	0.00513793	0.00363524	ENSMUSG00000016984/ENSMUSG00000031714/ENSMUSG00000001729/ENSMUSG00000079055/ENSMUSG00000027358/ENSMUSG00000019850/ENSMUSG00000071369/ENSMUSG00000029468/ENSMUSG00000024427/ENSMUSG00000036585/ENSMUSG00000024620/ENSMUSG00000049107/ENSMUSG00000004266/ENSMUSG00000003031/ENSMUSG00000030201/ENSMUSG00000029616/ENSMUSG00000019969/ENSMUSG00000028284/ENSMUSG00000027524/ENSMUSG00000014426/ENSMUSG00000024286/…	139
GO:0048048	embryonic eye morphogenesis	27/7747	35/16212	0.771429	1.61435	3.48066	0.000374869	0.00528821	0.00374156	ENSMUSG00000020467/ENSMUSG00000039910/ENSMUSG00000029475/ENSMUSG00000015134/ENSMUSG00000030201/ENSMUSG00000008999/ENSMUSG00000024238/ENSMUSG00000008730/ENSMUSG00000061436/ENSMUSG00000034777/ENSMUSG00000032327/ENSMUSG00000001280/ENSMUSG00000001288/ENSMUSG00000066043/ENSMUSG00000020170/ENSMUSG00000038402/ENSMUSG00000021359/ENSMUSG00000006538/ENSMUSG00000027109/ENSMUSG00000017491/ENSMUSG00000007880/…	27
GO:0010595	positive regulation of endothelial cell migration	65/7747	100/16212	0.65	1.36024	3.45683	0.000375413	0.00528821	0.00374156	ENSMUSG00000031714/ENSMUSG00000001729/ENSMUSG00000021109/ENSMUSG00000029470/ENSMUSG00000036585/ENSMUSG00000033960/ENSMUSG00000025810/ENSMUSG00000022475/ENSMUSG00000026822/ENSMUSG00000062352/ENSMUSG00000028017/ENSMUSG00000020700/ENSMUSG00000023951/ENSMUSG00000021701/ENSMUSG00000048373/ENSMUSG00000020580/ENSMUSG00000050965/ENSMUSG00000001280/ENSMUSG00000000320/ENSMUSG00000041187/ENSMUSG00000013076/…	65
GO:0001764	neuron migration	117/7747	195/16212	0.6	1.25561	3.43527	0.000379849	0.00531946	0.00376367	ENSMUSG00000022812/ENSMUSG00000020283/ENSMUSG00000032532/ENSMUSG00000006932/ENSMUSG00000021294/ENSMUSG00000021270/ENSMUSG00000032846/ENSMUSG00000069171/ENSMUSG00000005583/ENSMUSG00000045591/ENSMUSG00000020003/ENSMUSG00000028577/ENSMUSG00000024617/ENSMUSG00000005069/ENSMUSG00000052934/ENSMUSG00000079036/ENSMUSG00000019969/ENSMUSG00000058835/ENSMUSG00000025810/ENSMUSG00000024366/ENSMUSG00000032913/…	117
GO:0032388	positive regulation of intracellular transport	91/7747	147/16212	0.619048	1.29547	3.44262	0.000380207	0.00531946	0.00376367	ENSMUSG00000022812/ENSMUSG00000051355/ENSMUSG00000018395/ENSMUSG00000021270/ENSMUSG00000018707/ENSMUSG00000021096/ENSMUSG00000034435/ENSMUSG00000021057/ENSMUSG00000026778/ENSMUSG00000050473/ENSMUSG00000024454/ENSMUSG00000024604/ENSMUSG00000042992/ENSMUSG00000019969/ENSMUSG00000052397/ENSMUSG00000022774/ENSMUSG00000006740/ENSMUSG00000022469/ENSMUSG00000020132/ENSMUSG00000031451/ENSMUSG00000023944/…	91
GO:0034614	cellular response to reactive oxygen species	91/7747	147/16212	0.619048	1.29547	3.44262	0.000380207	0.00531946	0.00376367	ENSMUSG00000026277/ENSMUSG00000020283/ENSMUSG00000031616/ENSMUSG00000001729/ENSMUSG00000019850/ENSMUSG00000071369/ENSMUSG00000033871/ENSMUSG00000024620/ENSMUSG00000005069/ENSMUSG00000021215/ENSMUSG00000003849/ENSMUSG00000021032/ENSMUSG00000006818/ENSMUSG00000003032/ENSMUSG00000021461/ENSMUSG00000035960/ENSMUSG00000059363/ENSMUSG00000026822/ENSMUSG00000061878/ENSMUSG00000020810/ENSMUSG00000020715/…	91
GO:0014896	muscle hypertrophy	75/7747	118/16212	0.635593	1.33009	3.44274	0.000388681	0.00541358	0.00383026	ENSMUSG00000022812/ENSMUSG00000020160/ENSMUSG00000031681/ENSMUSG00000027358/ENSMUSG00000021944/ENSMUSG00000005583/ENSMUSG00000066406/ENSMUSG00000030557/ENSMUSG00000029470/ENSMUSG00000029467/ENSMUSG00000024431/ENSMUSG00000006519/ENSMUSG00000052920/ENSMUSG00000036023/ENSMUSG00000029840/ENSMUSG00000042010/ENSMUSG00000005836/ENSMUSG00000059743/ENSMUSG00000039197/ENSMUSG00000031068/ENSMUSG00000020580/…	75
GO:0060419	heart growth	75/7747	118/16212	0.635593	1.33009	3.44274	0.000388681	0.00541358	0.00383026	ENSMUSG00000022812/ENSMUSG00000020160/ENSMUSG00000006932/ENSMUSG00000031681/ENSMUSG00000021944/ENSMUSG00000005583/ENSMUSG00000039910/ENSMUSG00000066406/ENSMUSG00000036585/ENSMUSG00000024431/ENSMUSG00000052920/ENSMUSG00000036023/ENSMUSG00000042010/ENSMUSG00000005836/ENSMUSG00000059743/ENSMUSG00000020612/ENSMUSG00000031400/ENSMUSG00000053819/ENSMUSG00000031626/ENSMUSG00000031633/ENSMUSG00000020900/…	75
GO:0007272	ensheathment of neurons	104/7747	171/16212	0.608187	1.27274	3.42998	0.000392216	0.00543838	0.00384781	ENSMUSG00000040537/ENSMUSG00000006932/ENSMUSG00000001729/ENSMUSG00000079055/ENSMUSG00000049107/ENSMUSG00000030342/ENSMUSG00000033579/ENSMUSG00000004788/ENSMUSG00000062078/ENSMUSG00000075703/ENSMUSG00000050947/ENSMUSG00000031668/ENSMUSG00000037868/ENSMUSG00000055022/ENSMUSG00000028402/ENSMUSG00000026944/ENSMUSG00000029838/ENSMUSG00000020593/ENSMUSG00000059923/ENSMUSG00000020758/ENSMUSG00000023915/…	104
GO:0008366	axon ensheathment	104/7747	171/16212	0.608187	1.27274	3.42998	0.000392216	0.00543838	0.00384781	ENSMUSG00000040537/ENSMUSG00000006932/ENSMUSG00000001729/ENSMUSG00000079055/ENSMUSG00000049107/ENSMUSG00000030342/ENSMUSG00000033579/ENSMUSG00000004788/ENSMUSG00000062078/ENSMUSG00000075703/ENSMUSG00000050947/ENSMUSG00000031668/ENSMUSG00000037868/ENSMUSG00000055022/ENSMUSG00000028402/ENSMUSG00000026944/ENSMUSG00000029838/ENSMUSG00000020593/ENSMUSG00000059923/ENSMUSG00000020758/ENSMUSG00000023915/…	104
GO:0040014	regulation of multicellular organism growth	49/7747	72/16212	0.680556	1.42419	3.45087	0.00039695	0.00548287	0.00387929	ENSMUSG00000025958/ENSMUSG00000024454/ENSMUSG00000005069/ENSMUSG00000042605/ENSMUSG00000027523/ENSMUSG00000052397/ENSMUSG00000014599/ENSMUSG00000057329/ENSMUSG00000021466/ENSMUSG00000062115/ENSMUSG00000059363/ENSMUSG00000027274/ENSMUSG00000043207/ENSMUSG00000028655/ENSMUSG00000005506/ENSMUSG00000033735/ENSMUSG00000020097/ENSMUSG00000004040/ENSMUSG00000031400/ENSMUSG00000002307/ENSMUSG00000025235/…	49
GO:0003231	cardiac ventricle development	86/7747	138/16212	0.623188	1.30413	3.43243	0.000397194	0.00548287	0.00387929	ENSMUSG00000044674/ENSMUSG00000006932/ENSMUSG00000031616/ENSMUSG00000021109/ENSMUSG00000027966/ENSMUSG00000021944/ENSMUSG00000005583/ENSMUSG00000039910/ENSMUSG00000030201/ENSMUSG00000042812/ENSMUSG00000018604/ENSMUSG00000026976/ENSMUSG00000041957/ENSMUSG00000048349/ENSMUSG00000067336/ENSMUSG00000020644/ENSMUSG00000001870/ENSMUSG00000028023/ENSMUSG00000023972/ENSMUSG00000027276/ENSMUSG00000043207/…	86
GO:0014855	striated muscle cell proliferation	57/7747	86/16212	0.662791	1.38701	3.44244	0.000402161	0.00552822	0.00391137	ENSMUSG00000022905/ENSMUSG00000006932/ENSMUSG00000031681/ENSMUSG00000051367/ENSMUSG00000021944/ENSMUSG00000005583/ENSMUSG00000039910/ENSMUSG00000036585/ENSMUSG00000026031/ENSMUSG00000023075/ENSMUSG00000005836/ENSMUSG00000004040/ENSMUSG00000020612/ENSMUSG00000020900/ENSMUSG00000053110/ENSMUSG00000007613/ENSMUSG00000021796/ENSMUSG00000027646/ENSMUSG00000024789/ENSMUSG00000020063/ENSMUSG00000024014/…	57
GO:0043491	phosphatidylinositol 3-kinase/protein kinase B signal transduction	171/7747	297/16212	0.575758	1.20488	3.40899	0.000402263	0.00552822	0.00391137	ENSMUSG00000047443/ENSMUSG00000022812/ENSMUSG00000038845/ENSMUSG00000020458/ENSMUSG00000001729/ENSMUSG00000037526/ENSMUSG00000029470/ENSMUSG00000024486/ENSMUSG00000024621/ENSMUSG00000024620/ENSMUSG00000004266/ENSMUSG00000042594/ENSMUSG00000035274/ENSMUSG00000033721/ENSMUSG00000044340/ENSMUSG00000022469/ENSMUSG00000022114/ENSMUSG00000038894/ENSMUSG00000031451/ENSMUSG00000003032/ENSMUSG00000021464/…	171
GO:0048008	platelet-derived growth factor receptor signaling pathway	42/7747	60/16212	0.7	1.46488	3.45111	0.000403719	0.00553596	0.00391685	ENSMUSG00000031714/ENSMUSG00000000915/ENSMUSG00000024620/ENSMUSG00000043733/ENSMUSG00000025810/ENSMUSG00000032913/ENSMUSG00000036564/ENSMUSG00000019947/ENSMUSG00000024750/ENSMUSG00000024529/ENSMUSG00000020733/ENSMUSG00000023951/ENSMUSG00000025314/ENSMUSG00000034640/ENSMUSG00000020097/ENSMUSG00000028128/ENSMUSG00000022637/ENSMUSG00000030536/ENSMUSG00000032006/ENSMUSG00000028341/ENSMUSG00000027646/…	42
GO:0030258	lipid modification	112/7747	186/16212	0.602151	1.26011	3.41317	0.000413555	0.00565831	0.00400342	ENSMUSG00000020283/ENSMUSG00000003623/ENSMUSG00000001729/ENSMUSG00000021054/ENSMUSG00000030249/ENSMUSG00000020003/ENSMUSG00000055652/ENSMUSG00000004270/ENSMUSG00000005069/ENSMUSG00000030168/ENSMUSG00000042647/ENSMUSG00000033579/ENSMUSG00000021240/ENSMUSG00000044288/ENSMUSG00000023805/ENSMUSG00000031749/ENSMUSG00000038894/ENSMUSG00000035953/ENSMUSG00000029524/ENSMUSG00000029545/ENSMUSG00000026664/…	112
GO:0000956	nuclear-transcribed mRNA catabolic process	71/7747	111/16212	0.63964	1.33856	3.42398	0.000419008	0.00569572	0.00402989	ENSMUSG00000027770/ENSMUSG00000023087/ENSMUSG00000019977/ENSMUSG00000041477/ENSMUSG00000109941/ENSMUSG00000032423/ENSMUSG00000022774/ENSMUSG00000024234/ENSMUSG00000024360/ENSMUSG00000068823/ENSMUSG00000022283/ENSMUSG00000020166/ENSMUSG00000038398/ENSMUSG00000024472/ENSMUSG00000023952/ENSMUSG00000043962/ENSMUSG00000041530/ENSMUSG00000033166/ENSMUSG00000028639/ENSMUSG00000028330/ENSMUSG00000035649/…	71
GO:0046620	regulation of organ growth	71/7747	111/16212	0.63964	1.33856	3.42398	0.000419008	0.00569572	0.00402989	ENSMUSG00000001729/ENSMUSG00000021944/ENSMUSG00000005583/ENSMUSG00000039910/ENSMUSG00000024431/ENSMUSG00000030189/ENSMUSG00000036023/ENSMUSG00000059363/ENSMUSG00000042010/ENSMUSG00000005836/ENSMUSG00000059743/ENSMUSG00000031563/ENSMUSG00000039377/ENSMUSG00000031400/ENSMUSG00000031633/ENSMUSG00000019432/ENSMUSG00000001761/ENSMUSG00000038530/ENSMUSG00000053110/ENSMUSG00000040629/ENSMUSG00000007613/…	71
GO:0033674	positive regulation of kinase activity	153/7747	263/16212	0.581749	1.21742	3.40063	0.000419046	0.00569572	0.00402989	ENSMUSG00000016984/ENSMUSG00000031714/ENSMUSG00000020380/ENSMUSG00000001729/ENSMUSG00000021270/ENSMUSG00000071369/ENSMUSG00000029468/ENSMUSG00000036585/ENSMUSG00000024621/ENSMUSG00000024620/ENSMUSG00000049107/ENSMUSG00000029616/ENSMUSG00000031959/ENSMUSG00000019969/ENSMUSG00000028284/ENSMUSG00000027524/ENSMUSG00000002365/ENSMUSG00000014426/ENSMUSG00000058835/ENSMUSG00000024286/ENSMUSG00000052539/…	153
GO:0006023	aminoglycan biosynthetic process	39/7747	55/16212	0.709091	1.4839	3.43887	0.000426035	0.00575286	0.00407031	ENSMUSG00000022793/ENSMUSG00000051650/ENSMUSG00000031684/ENSMUSG00000029431/ENSMUSG00000032640/ENSMUSG00000024620/ENSMUSG00000054008/ENSMUSG00000041372/ENSMUSG00000031910/ENSMUSG00000031952/ENSMUSG00000043587/ENSMUSG00000028017/ENSMUSG00000037089/ENSMUSG00000034165/ENSMUSG00000042042/ENSMUSG00000051022/ENSMUSG00000039308/ENSMUSG00000057337/ENSMUSG00000020868/ENSMUSG00000039942/ENSMUSG00000022822/…	39
GO:0010463	mesenchymal cell proliferation	39/7747	55/16212	0.709091	1.4839	3.43887	0.000426035	0.00575286	0.00407031	ENSMUSG00000006932/ENSMUSG00000051367/ENSMUSG00000027358/ENSMUSG00000030201/ENSMUSG00000042812/ENSMUSG00000032419/ENSMUSG00000008999/ENSMUSG00000024238/ENSMUSG00000038894/ENSMUSG00000029838/ENSMUSG00000042258/ENSMUSG00000048450/ENSMUSG00000020612/ENSMUSG00000001761/ENSMUSG00000021796/ENSMUSG00000055980/ENSMUSG00000066551/ENSMUSG00000036862/ENSMUSG00000029563/ENSMUSG00000021835/ENSMUSG00000026586/…	39
GO:1900024	regulation of substrate adhesion-dependent cell spreading	39/7747	55/16212	0.709091	1.4839	3.43887	0.000426035	0.00575286	0.00407031	ENSMUSG00000024427/ENSMUSG00000025810/ENSMUSG00000041957/ENSMUSG00000019920/ENSMUSG00000032702/ENSMUSG00000004530/ENSMUSG00000062352/ENSMUSG00000024395/ENSMUSG00000057948/ENSMUSG00000058325/ENSMUSG00000054808/ENSMUSG00000031328/ENSMUSG00000074238/ENSMUSG00000022150/ENSMUSG00000048915/ENSMUSG00000002413/ENSMUSG00000030890/ENSMUSG00000068566/ENSMUSG00000022885/ENSMUSG00000041959/ENSMUSG00000028458/…	39
GO:0048732	gland development	273/7747	494/16212	0.552632	1.15648	3.37899	0.000430675	0.00579206	0.00409805	ENSMUSG00000025958/ENSMUSG00000022510/ENSMUSG00000020464/ENSMUSG00000020458/ENSMUSG00000006932/ENSMUSG00000031616/ENSMUSG00000048251/ENSMUSG00000051367/ENSMUSG00000021109/ENSMUSG00000033454/ENSMUSG00000027358/ENSMUSG00000021587/ENSMUSG00000039910/ENSMUSG00000019850/ENSMUSG00000019982/ENSMUSG00000045680/ENSMUSG00000015134/ENSMUSG00000036585/ENSMUSG00000024431/ENSMUSG00000024620/ENSMUSG00000003031/…	273
GO:0043648	dicarboxylic acid metabolic process	62/7747	95/16212	0.652632	1.36575	3.42028	0.000431741	0.00579206	0.00409805	ENSMUSG00000073609/ENSMUSG00000020321/ENSMUSG00000027737/ENSMUSG00000011148/ENSMUSG00000021048/ENSMUSG00000004789/ENSMUSG00000052392/ENSMUSG00000032418/ENSMUSG00000027513/ENSMUSG00000000673/ENSMUSG00000031672/ENSMUSG00000052738/ENSMUSG00000020534/ENSMUSG00000025007/ENSMUSG00000025176/ENSMUSG00000025190/ENSMUSG00000021794/ENSMUSG00000032350/ENSMUSG00000026664/ENSMUSG00000022110/ENSMUSG00000035637/…	62
GO:0071229	cellular response to acid chemical	62/7747	95/16212	0.652632	1.36575	3.42028	0.000431741	0.00579206	0.00409805	ENSMUSG00000051367/ENSMUSG00000024493/ENSMUSG00000000263/ENSMUSG00000040010/ENSMUSG00000028278/ENSMUSG00000024238/ENSMUSG00000027859/ENSMUSG00000050947/ENSMUSG00000031502/ENSMUSG00000032350/ENSMUSG00000006476/ENSMUSG00000023951/ENSMUSG00000023977/ENSMUSG00000028785/ENSMUSG00000040690/ENSMUSG00000047789/ENSMUSG00000001506/ENSMUSG00000029661/ENSMUSG00000024590/ENSMUSG00000028124/ENSMUSG00000050552/…	62
GO:0051932	synaptic transmission, GABAergic	46/7747	67/16212	0.686567	1.43677	3.42709	0.000436667	0.00584199	0.00413337	ENSMUSG00000020128/ENSMUSG00000025786/ENSMUSG00000030265/ENSMUSG00000008153/ENSMUSG00000035274/ENSMUSG00000044288/ENSMUSG00000006740/ENSMUSG00000027562/ENSMUSG00000061762/ENSMUSG00000030043/ENSMUSG00000029054/ENSMUSG00000051790/ENSMUSG00000024462/ENSMUSG00000048304/ENSMUSG00000004319/ENSMUSG00000030898/ENSMUSG00000020716/ENSMUSG00000055078/ENSMUSG00000047507/ENSMUSG00000036062/ENSMUSG00000026797/…	46
GO:1903844	regulation of cellular response to transforming growth factor beta stimulus	82/7747	131/16212	0.625954	1.30992	3.40714	0.000437875	0.00584199	0.00413337	ENSMUSG00000045671/ENSMUSG00000026768/ENSMUSG00000048118/ENSMUSG00000021096/ENSMUSG00000027358/ENSMUSG00000027356/ENSMUSG00000039910/ENSMUSG00000061048/ENSMUSG00000003316/ENSMUSG00000021253/ENSMUSG00000024238/ENSMUSG00000033014/ENSMUSG00000039985/ENSMUSG00000022114/ENSMUSG00000066900/ENSMUSG00000045969/ENSMUSG00000025190/ENSMUSG00000061436/ENSMUSG00000026031/ENSMUSG00000024529/ENSMUSG00000001870/…	82
GO:0000245	spliceosomal complex assembly	33/7747	45/16212	0.733333	1.53463	3.43562	0.000438732	0.00584199	0.00413337	ENSMUSG00000027763/ENSMUSG00000035597/ENSMUSG00000001767/ENSMUSG00000056305/ENSMUSG00000028484/ENSMUSG00000029823/ENSMUSG00000028902/ENSMUSG00000005506/ENSMUSG00000028330/ENSMUSG00000021500/ENSMUSG00000020863/ENSMUSG00000029439/ENSMUSG00000019432/ENSMUSG00000035125/ENSMUSG00000028137/ENSMUSG00000024188/ENSMUSG00000062604/ENSMUSG00000043535/ENSMUSG00000060121/ENSMUSG00000055760/ENSMUSG00000035851/…	33
GO:0006024	glycosaminoglycan biosynthetic process	36/7747	50/16212	0.72	1.50673	3.43299	0.000439233	0.00584199	0.00413337	ENSMUSG00000022793/ENSMUSG00000031684/ENSMUSG00000032640/ENSMUSG00000024620/ENSMUSG00000054008/ENSMUSG00000041372/ENSMUSG00000031910/ENSMUSG00000031952/ENSMUSG00000043587/ENSMUSG00000028017/ENSMUSG00000037089/ENSMUSG00000034165/ENSMUSG00000042042/ENSMUSG00000051022/ENSMUSG00000039308/ENSMUSG00000057337/ENSMUSG00000020868/ENSMUSG00000039942/ENSMUSG00000022822/ENSMUSG00000037347/ENSMUSG00000029201/…	36
GO:0032367	intracellular cholesterol transport	25/7747	32/16212	0.78125	1.63491	3.43917	0.000441569	0.00584796	0.0041376	ENSMUSG00000020128/ENSMUSG00000030201/ENSMUSG00000026737/ENSMUSG00000026319/ENSMUSG00000039050/ENSMUSG00000026944/ENSMUSG00000024319/ENSMUSG00000024413/ENSMUSG00000024378/ENSMUSG00000002308/ENSMUSG00000017288/ENSMUSG00000037278/ENSMUSG00000024030/ENSMUSG00000015243/ENSMUSG00000031574/ENSMUSG00000023068/ENSMUSG00000037295/ENSMUSG00000032231/ENSMUSG00000030105/ENSMUSG00000028603/ENSMUSG00000032193/…	25
GO:1902686	mitochondrial outer membrane permeabilization involved in programmed cell death	25/7747	32/16212	0.78125	1.63491	3.43917	0.000441569	0.00584796	0.0041376	ENSMUSG00000026278/ENSMUSG00000022812/ENSMUSG00000064326/ENSMUSG00000000915/ENSMUSG00000004446/ENSMUSG00000000738/ENSMUSG00000025933/ENSMUSG00000032350/ENSMUSG00000021868/ENSMUSG00000021771/ENSMUSG00000031633/ENSMUSG00000003541/ENSMUSG00000057789/ENSMUSG00000017686/ENSMUSG00000036880/ENSMUSG00000025733/ENSMUSG00000027381/ENSMUSG00000007659/ENSMUSG00000069041/ENSMUSG00000027104/ENSMUSG00000028801/…	25
GO:0000045	autophagosome assembly	67/7747	104/16212	0.644231	1.34817	3.40757	0.000447934	0.00590654	0.00417904	ENSMUSG00000026280/ENSMUSG00000020149/ENSMUSG00000028080/ENSMUSG00000037526/ENSMUSG00000028300/ENSMUSG00000029467/ENSMUSG00000030161/ENSMUSG00000031950/ENSMUSG00000019969/ENSMUSG00000026737/ENSMUSG00000040412/ENSMUSG00000049323/ENSMUSG00000027244/ENSMUSG00000040506/ENSMUSG00000020952/ENSMUSG00000025173/ENSMUSG00000104158/ENSMUSG00000032308/ENSMUSG00000041895/ENSMUSG00000037204/ENSMUSG00000019518/…	67
GO:0021543	pallium development	114/7747	190/16212	0.6	1.25561	3.39041	0.000448133	0.00590654	0.00417904	ENSMUSG00000022812/ENSMUSG00000020283/ENSMUSG00000020458/ENSMUSG00000006932/ENSMUSG00000028078/ENSMUSG00000037161/ENSMUSG00000018395/ENSMUSG00000044894/ENSMUSG00000021294/ENSMUSG00000021109/ENSMUSG00000069171/ENSMUSG00000024621/ENSMUSG00000030329/ENSMUSG00000005069/ENSMUSG00000030201/ENSMUSG00000022462/ENSMUSG00000019969/ENSMUSG00000028291/ENSMUSG00000028640/ENSMUSG00000040724/ENSMUSG00000040389/…	114
GO:0014812	muscle cell migration	77/7747	122/16212	0.631148	1.32079	3.40237	0.000448851	0.00590654	0.00417904	ENSMUSG00000051367/ENSMUSG00000005583/ENSMUSG00000024620/ENSMUSG00000021215/ENSMUSG00000028284/ENSMUSG00000025810/ENSMUSG00000038418/ENSMUSG00000036564/ENSMUSG00000052920/ENSMUSG00000057329/ENSMUSG00000022469/ENSMUSG00000035960/ENSMUSG00000042121/ENSMUSG00000062352/ENSMUSG00000020681/ENSMUSG00000023075/ENSMUSG00000021699/ENSMUSG00000021756/ENSMUSG00000021822/ENSMUSG00000030043/ENSMUSG00000028128/…	77
GO:0032092	positive regulation of protein binding	50/7747	74/16212	0.675676	1.41397	3.41446	0.000452821	0.00594615	0.00420707	ENSMUSG00000049502/ENSMUSG00000022812/ENSMUSG00000000600/ENSMUSG00000007411/ENSMUSG00000044548/ENSMUSG00000000915/ENSMUSG00000027358/ENSMUSG00000031668/ENSMUSG00000029550/ENSMUSG00000061436/ENSMUSG00000041135/ENSMUSG00000027787/ENSMUSG00000037523/ENSMUSG00000062232/ENSMUSG00000030000/ENSMUSG00000059714/ENSMUSG00000040359/ENSMUSG00000002985/ENSMUSG00000028906/ENSMUSG00000029869/ENSMUSG00000032171/…	50
GO:0014910	regulation of smooth muscle cell migration	63/7747	97/16212	0.649485	1.35916	3.39408	0.000473977	0.0062094	0.00439333	ENSMUSG00000005583/ENSMUSG00000024620/ENSMUSG00000028284/ENSMUSG00000025810/ENSMUSG00000038418/ENSMUSG00000036564/ENSMUSG00000052920/ENSMUSG00000057329/ENSMUSG00000022469/ENSMUSG00000035960/ENSMUSG00000042121/ENSMUSG00000020681/ENSMUSG00000021699/ENSMUSG00000021756/ENSMUSG00000021822/ENSMUSG00000030043/ENSMUSG00000028128/ENSMUSG00000020611/ENSMUSG00000053819/ENSMUSG00000070047/ENSMUSG00000032501/…	63
GO:0150116	regulation of cell-substrate junction organization	43/7747	62/16212	0.693548	1.45138	3.40648	0.000474872	0.0062094	0.00439333	ENSMUSG00000033149/ENSMUSG00000043733/ENSMUSG00000024277/ENSMUSG00000025810/ENSMUSG00000019920/ENSMUSG00000004530/ENSMUSG00000062352/ENSMUSG00000023951/ENSMUSG00000040690/ENSMUSG00000025314/ENSMUSG00000052504/ENSMUSG00000021823/ENSMUSG00000031342/ENSMUSG00000031355/ENSMUSG00000000530/ENSMUSG00000030536/ENSMUSG00000064302/ENSMUSG00000027646/ENSMUSG00000074305/ENSMUSG00000048915/ENSMUSG00000026074/…	43
GO:0090316	positive regulation of intracellular protein transport	68/7747	106/16212	0.641509	1.34247	3.38412	0.000486744	0.00635124	0.00449369	ENSMUSG00000022812/ENSMUSG00000051355/ENSMUSG00000018395/ENSMUSG00000021270/ENSMUSG00000021096/ENSMUSG00000034435/ENSMUSG00000021057/ENSMUSG00000026778/ENSMUSG00000050473/ENSMUSG00000024454/ENSMUSG00000024604/ENSMUSG00000019969/ENSMUSG00000006740/ENSMUSG00000022469/ENSMUSG00000031451/ENSMUSG00000023944/ENSMUSG00000032328/ENSMUSG00000028333/ENSMUSG00000037523/ENSMUSG00000001552/ENSMUSG00000031328/…	68
GO:0032259	methylation	109/7747	181/16212	0.60221	1.26023	3.36806	0.000487952	0.00635363	0.00449537	ENSMUSG00000026707/ENSMUSG00000037111/ENSMUSG00000001729/ENSMUSG00000060950/ENSMUSG00000004268/ENSMUSG00000030350/ENSMUSG00000024360/ENSMUSG00000045662/ENSMUSG00000046441/ENSMUSG00000031671/ENSMUSG00000055027/ENSMUSG00000000301/ENSMUSG00000041733/ENSMUSG00000062937/ENSMUSG00000026646/ENSMUSG00000036893/ENSMUSG00000071350/ENSMUSG00000020706/ENSMUSG00000027384/ENSMUSG00000075028/ENSMUSG00000025747/…	109
GO:1903432	regulation of TORC1 signaling	59/7747	90/16212	0.655556	1.37187	3.38423	0.000495202	0.0063823	0.00451566	ENSMUSG00000035992/ENSMUSG00000001729/ENSMUSG00000028300/ENSMUSG00000024493/ENSMUSG00000024576/ENSMUSG00000001518/ENSMUSG00000031959/ENSMUSG00000028278/ENSMUSG00000024283/ENSMUSG00000019927/ENSMUSG00000047496/ENSMUSG00000049323/ENSMUSG00000035953/ENSMUSG00000021457/ENSMUSG00000027579/ENSMUSG00000024413/ENSMUSG00000047789/ENSMUSG00000061175/ENSMUSG00000020386/ENSMUSG00000042447/ENSMUSG00000063065/…	59
GO:0051494	negative regulation of cytoskeleton organization	96/7747	157/16212	0.611465	1.2796	3.36777	0.000495465	0.0063823	0.00451566	ENSMUSG00000033149/ENSMUSG00000020315/ENSMUSG00000021262/ENSMUSG00000000915/ENSMUSG00000021061/ENSMUSG00000019970/ENSMUSG00000030516/ENSMUSG00000030357/ENSMUSG00000032624/ENSMUSG00000040852/ENSMUSG00000024236/ENSMUSG00000040389/ENSMUSG00000056737/ENSMUSG00000002812/ENSMUSG00000032702/ENSMUSG00000029840/ENSMUSG00000042121/ENSMUSG00000027274/ENSMUSG00000021754/ENSMUSG00000028328/ENSMUSG00000102422/…	96
GO:1902904	negative regulation of supramolecular fiber organization	96/7747	157/16212	0.611465	1.2796	3.36777	0.000495465	0.0063823	0.00451566	ENSMUSG00000033149/ENSMUSG00000020315/ENSMUSG00000021262/ENSMUSG00000000915/ENSMUSG00000021061/ENSMUSG00000019970/ENSMUSG00000030516/ENSMUSG00000024346/ENSMUSG00000030357/ENSMUSG00000032624/ENSMUSG00000040852/ENSMUSG00000024236/ENSMUSG00000040389/ENSMUSG00000056737/ENSMUSG00000002812/ENSMUSG00000032702/ENSMUSG00000029840/ENSMUSG00000042121/ENSMUSG00000027274/ENSMUSG00000021754/ENSMUSG00000028328/…	96
GO:0045598	regulation of fat cell differentiation	84/7747	135/16212	0.622222	1.30211	3.37203	0.000495575	0.0063823	0.00451566	ENSMUSG00000025958/ENSMUSG00000023087/ENSMUSG00000001729/ENSMUSG00000044548/ENSMUSG00000051367/ENSMUSG00000027358/ENSMUSG00000032652/ENSMUSG00000030201/ENSMUSG00000030170/ENSMUSG00000034271/ENSMUSG00000008999/ENSMUSG00000006818/ENSMUSG00000061013/ENSMUSG00000068747/ENSMUSG00000022111/ENSMUSG00000042190/ENSMUSG00000026676/ENSMUSG00000014547/ENSMUSG00000020644/ENSMUSG00000020593/ENSMUSG00000023951/…	84
GO:0048565	digestive tract development	84/7747	135/16212	0.622222	1.30211	3.37203	0.000495575	0.0063823	0.00451566	ENSMUSG00000022510/ENSMUSG00000006932/ENSMUSG00000044548/ENSMUSG00000021109/ENSMUSG00000021944/ENSMUSG00000019982/ENSMUSG00000045680/ENSMUSG00000042812/ENSMUSG00000097084/ENSMUSG00000024247/ENSMUSG00000057329/ENSMUSG00000018822/ENSMUSG00000022106/ENSMUSG00000022105/ENSMUSG00000020644/ENSMUSG00000028023/ENSMUSG00000024319/ENSMUSG00000023991/ENSMUSG00000005836/ENSMUSG00000025747/ENSMUSG00000070990/…	84
GO:0030003	intracellular monoatomic cation homeostasis	270/7747	489/16212	0.552147	1.15547	3.33954	0.000496332	0.0063823	0.00451566	ENSMUSG00000026278/ENSMUSG00000047443/ENSMUSG00000027765/ENSMUSG00000051980/ENSMUSG00000052459/ENSMUSG00000020128/ENSMUSG00000051355/ENSMUSG00000003161/ENSMUSG00000015653/ENSMUSG00000038023/ENSMUSG00000031616/ENSMUSG00000031684/ENSMUSG00000037904/ENSMUSG00000079055/ENSMUSG00000021109/ENSMUSG00000029434/ENSMUSG00000030287/ENSMUSG00000019970/ENSMUSG00000053025/ENSMUSG00000029468/ENSMUSG00000024456/…	270
GO:0045879	negative regulation of smoothened signaling pathway	28/7747	37/16212	0.756757	1.58365	3.40009	0.000508765	0.00651513	0.00460964	ENSMUSG00000064325/ENSMUSG00000021466/ENSMUSG00000022105/ENSMUSG00000039153/ENSMUSG00000026424/ENSMUSG00000032308/ENSMUSG00000020372/ENSMUSG00000045039/ENSMUSG00000034292/ENSMUSG00000040836/ENSMUSG00000021483/ENSMUSG00000020064/ENSMUSG00000026249/ENSMUSG00000014303/ENSMUSG00000028452/ENSMUSG00000022517/ENSMUSG00000031665/ENSMUSG00000024565/ENSMUSG00000046096/ENSMUSG00000055653/ENSMUSG00000021318/…	28
GO:0060391	positive regulation of SMAD protein signal transduction	28/7747	37/16212	0.756757	1.58365	3.40009	0.000508765	0.00651513	0.00460964	ENSMUSG00000027358/ENSMUSG00000021253/ENSMUSG00000008999/ENSMUSG00000067336/ENSMUSG00000030733/ENSMUSG00000000530/ENSMUSG00000024387/ENSMUSG00000007613/ENSMUSG00000021796/ENSMUSG00000022150/ENSMUSG00000037171/ENSMUSG00000024789/ENSMUSG00000024515/ENSMUSG00000032939/ENSMUSG00000025352/ENSMUSG00000021835/ENSMUSG00000039004/ENSMUSG00000006711/ENSMUSG00000051279/ENSMUSG00000038259/ENSMUSG00000032440/…	28
GO:0003171	atrioventricular valve development	23/7747	29/16212	0.793103	1.65971	3.40159	0.000511903	0.0065418	0.00462851	ENSMUSG00000027358/ENSMUSG00000021944/ENSMUSG00000067336/ENSMUSG00000028023/ENSMUSG00000032744/ENSMUSG00000040289/ENSMUSG00000001751/ENSMUSG00000000142/ENSMUSG00000021796/ENSMUSG00000036862/ENSMUSG00000024515/ENSMUSG00000026833/ENSMUSG00000026923/ENSMUSG00000076431/ENSMUSG00000056427/ENSMUSG00000032440/ENSMUSG00000036867/ENSMUSG00000028195/ENSMUSG00000022306/ENSMUSG00000044338/ENSMUSG00000031965/…	23
GO:0006282	regulation of DNA repair	118/7747	198/16212	0.59596	1.24715	3.3474	0.000520805	0.00664187	0.00469931	ENSMUSG00000032409/ENSMUSG00000034206/ENSMUSG00000020152/ENSMUSG00000020463/ENSMUSG00000040865/ENSMUSG00000029438/ENSMUSG00000021694/ENSMUSG00000010461/ENSMUSG00000030346/ENSMUSG00000001517/ENSMUSG00000035842/ENSMUSG00000030166/ENSMUSG00000010154/ENSMUSG00000033430/ENSMUSG00000022674/ENSMUSG00000024240/ENSMUSG00000003778/ENSMUSG00000037855/ENSMUSG00000021911/ENSMUSG00000054051/ENSMUSG00000027569/…	118
GO:0021953	central nervous system neuron differentiation	126/7747	213/16212	0.591549	1.23792	3.3438	0.000523869	0.00665642	0.00470961	ENSMUSG00000006932/ENSMUSG00000028078/ENSMUSG00000044894/ENSMUSG00000048251/ENSMUSG00000026317/ENSMUSG00000032846/ENSMUSG00000045591/ENSMUSG00000024621/ENSMUSG00000038593/ENSMUSG00000005069/ENSMUSG00000042605/ENSMUSG00000019969/ENSMUSG00000028640/ENSMUSG00000025810/ENSMUSG00000040389/ENSMUSG00000048349/ENSMUSG00000021466/ENSMUSG00000042372/ENSMUSG00000029840/ENSMUSG00000029765/ENSMUSG00000036376/…	126
GO:0002062	chondrocyte differentiation	74/7747	117/16212	0.632479	1.32358	3.36033	0.000524728	0.00665642	0.00470961	ENSMUSG00000020467/ENSMUSG00000006932/ENSMUSG00000021109/ENSMUSG00000027966/ENSMUSG00000027358/ENSMUSG00000005583/ENSMUSG00000019997/ENSMUSG00000032640/ENSMUSG00000034320/ENSMUSG00000003316/ENSMUSG00000043733/ENSMUSG00000024247/ENSMUSG00000061013/ENSMUSG00000027840/ENSMUSG00000031668/ENSMUSG00000022483/ENSMUSG00000048776/ENSMUSG00000067336/ENSMUSG00000021464/ENSMUSG00000038648/ENSMUSG00000022105/…	74
GO:0046341	CDP-diacylglycerol metabolic process	13/7747	14/16212	0.928571	1.9432	3.37751	0.000525168	0.00665642	0.00470961	ENSMUSG00000023827/ENSMUSG00000058793/ENSMUSG00000030682/ENSMUSG00000034254/ENSMUSG00000029330/ENSMUSG00000029314/ENSMUSG00000001211/ENSMUSG00000026922/ENSMUSG00000031545/ENSMUSG00000046338/ENSMUSG00000030316/ENSMUSG00000054469/ENSMUSG00000024978	13
GO:0002181	cytoplasmic translation	91/7747	148/16212	0.614865	1.28672	3.35208	0.000527273	0.00666946	0.00471884	ENSMUSG00000027770/ENSMUSG00000029388/ENSMUSG00000028081/ENSMUSG00000021282/ENSMUSG00000023106/ENSMUSG00000024608/ENSMUSG00000029614/ENSMUSG00000004788/ENSMUSG00000032423/ENSMUSG00000022774/ENSMUSG00000024360/ENSMUSG00000068823/ENSMUSG00000068739/ENSMUSG00000022283/ENSMUSG00000029423/ENSMUSG00000028495/ENSMUSG00000020537/ENSMUSG00000067274/ENSMUSG00000039001/ENSMUSG00000057322/ENSMUSG00000020743/…	91
GO:0006623	protein targeting to vacuole	31/7747	42/16212	0.738095	1.5446	3.38068	0.000541847	0.00682595	0.00482955	ENSMUSG00000020128/ENSMUSG00000066278/ENSMUSG00000037526/ENSMUSG00000024107/ENSMUSG00000068747/ENSMUSG00000038039/ENSMUSG00000056234/ENSMUSG00000020740/ENSMUSG00000027534/ENSMUSG00000028581/ENSMUSG00000019518/ENSMUSG00000033628/ENSMUSG00000032571/ENSMUSG00000078908/ENSMUSG00000033653/ENSMUSG00000043614/ENSMUSG00000017288/ENSMUSG00000038780/ENSMUSG00000015837/ENSMUSG00000049313/ENSMUSG00000020220/…	31
GO:0031124	mRNA 3'-end processing	31/7747	42/16212	0.738095	1.5446	3.38068	0.000541847	0.00682595	0.00482955	ENSMUSG00000027770/ENSMUSG00000029427/ENSMUSG00000027498/ENSMUSG00000022774/ENSMUSG00000027893/ENSMUSG00000049285/ENSMUSG00000024400/ENSMUSG00000050188/ENSMUSG00000028330/ENSMUSG00000041328/ENSMUSG00000021111/ENSMUSG00000027651/ENSMUSG00000028106/ENSMUSG00000036779/ENSMUSG00000031754/ENSMUSG00000009555/ENSMUSG00000021127/ENSMUSG00000029227/ENSMUSG00000035851/ENSMUSG00000040446/ENSMUSG00000031256/…	31
GO:0017015	regulation of transforming growth factor beta receptor signaling pathway	80/7747	128/16212	0.625	1.30793	3.34589	0.000547304	0.00687665	0.00486543	ENSMUSG00000045671/ENSMUSG00000026768/ENSMUSG00000048118/ENSMUSG00000021096/ENSMUSG00000027358/ENSMUSG00000027356/ENSMUSG00000039910/ENSMUSG00000061048/ENSMUSG00000003316/ENSMUSG00000021253/ENSMUSG00000024238/ENSMUSG00000033014/ENSMUSG00000039985/ENSMUSG00000022114/ENSMUSG00000066900/ENSMUSG00000045969/ENSMUSG00000025190/ENSMUSG00000061436/ENSMUSG00000024529/ENSMUSG00000001870/ENSMUSG00000023944/…	80
GO:1902459	positive regulation of stem cell population maintenance	34/7747	47/16212	0.723404	1.51385	3.37489	0.00054809	0.00687665	0.00486543	ENSMUSG00000022510/ENSMUSG00000048118/ENSMUSG00000029438/ENSMUSG00000029475/ENSMUSG00000030353/ENSMUSG00000039985/ENSMUSG00000066900/ENSMUSG00000045969/ENSMUSG00000036568/ENSMUSG00000057236/ENSMUSG00000037013/ENSMUSG00000020519/ENSMUSG00000031353/ENSMUSG00000042557/ENSMUSG00000063049/ENSMUSG00000029712/ENSMUSG00000053110/ENSMUSG00000034160/ENSMUSG00000023883/ENSMUSG00000002249/ENSMUSG00000029681/…	34
GO:0045860	positive regulation of protein kinase activity	145/7747	249/16212	0.582329	1.21863	3.3259	0.000550251	0.00688981	0.00487474	ENSMUSG00000016984/ENSMUSG00000031714/ENSMUSG00000001729/ENSMUSG00000021270/ENSMUSG00000071369/ENSMUSG00000029468/ENSMUSG00000036585/ENSMUSG00000024621/ENSMUSG00000024620/ENSMUSG00000049107/ENSMUSG00000029616/ENSMUSG00000031959/ENSMUSG00000019969/ENSMUSG00000028284/ENSMUSG00000027524/ENSMUSG00000002365/ENSMUSG00000014426/ENSMUSG00000058835/ENSMUSG00000024286/ENSMUSG00000052539/ENSMUSG00000014599/…	145
GO:0035050	embryonic heart tube development	56/7747	85/16212	0.658824	1.37871	3.34884	0.000566197	0.00707518	0.00500589	ENSMUSG00000006932/ENSMUSG00000031616/ENSMUSG00000018395/ENSMUSG00000021109/ENSMUSG00000021944/ENSMUSG00000005583/ENSMUSG00000039910/ENSMUSG00000030201/ENSMUSG00000019969/ENSMUSG00000018604/ENSMUSG00000010136/ENSMUSG00000046470/ENSMUSG00000029765/ENSMUSG00000071350/ENSMUSG00000028023/ENSMUSG00000020747/ENSMUSG00000015605/ENSMUSG00000024294/ENSMUSG00000037335/ENSMUSG00000030699/ENSMUSG00000020888/…	56
GO:0009226	nucleotide-sugar biosynthetic process	21/7747	26/16212	0.807692	1.69024	3.36959	0.000580362	0.00723759	0.00512081	ENSMUSG00000001891/ENSMUSG00000030282/ENSMUSG00000052102/ENSMUSG00000056131/ENSMUSG00000028293/ENSMUSG00000026956/ENSMUSG00000049922/ENSMUSG00000036820/ENSMUSG00000029992/ENSMUSG00000032306/ENSMUSG00000025466/ENSMUSG00000026670/ENSMUSG00000037012/ENSMUSG00000029201/ENSMUSG00000037722/ENSMUSG00000029209/ENSMUSG00000033021/ENSMUSG00000020363/ENSMUSG00000022474/ENSMUSG00000053870/ENSMUSG00000022570	21
GO:0050773	regulation of dendrite development	81/7747	130/16212	0.623077	1.3039	3.32807	0.000582229	0.00724629	0.00512696	ENSMUSG00000027770/ENSMUSG00000022812/ENSMUSG00000020152/ENSMUSG00000000861/ENSMUSG00000037161/ENSMUSG00000021057/ENSMUSG00000049550/ENSMUSG00000019970/ENSMUSG00000042589/ENSMUSG00000052934/ENSMUSG00000042700/ENSMUSG00000008999/ENSMUSG00000020476/ENSMUSG00000032867/ENSMUSG00000030309/ENSMUSG00000022789/ENSMUSG00000020132/ENSMUSG00000039145/ENSMUSG00000006476/ENSMUSG00000026959/ENSMUSG00000026965/…	81
GO:0098773	skin epidermis development	87/7747	141/16212	0.617021	1.29123	3.32262	0.000588539	0.00731016	0.00517214	ENSMUSG00000022510/ENSMUSG00000006932/ENSMUSG00000001729/ENSMUSG00000027356/ENSMUSG00000024454/ENSMUSG00000061048/ENSMUSG00000033579/ENSMUSG00000019969/ENSMUSG00000027523/ENSMUSG00000028640/ENSMUSG00000057329/ENSMUSG00000003227/ENSMUSG00000028403/ENSMUSG00000003032/ENSMUSG00000046470/ENSMUSG00000036731/ENSMUSG00000020656/ENSMUSG00000015605/ENSMUSG00000043207/ENSMUSG00000027253/ENSMUSG00000005836/…	87
GO:0043393	regulation of protein binding	100/7747	165/16212	0.606061	1.26829	3.31368	0.00059771	0.00739063	0.00522909	ENSMUSG00000032409/ENSMUSG00000049502/ENSMUSG00000022812/ENSMUSG00000000600/ENSMUSG00000001729/ENSMUSG00000007411/ENSMUSG00000044548/ENSMUSG00000000915/ENSMUSG00000027358/ENSMUSG00000070509/ENSMUSG00000029467/ENSMUSG00000035842/ENSMUSG00000019969/ENSMUSG00000031668/ENSMUSG00000042401/ENSMUSG00000029550/ENSMUSG00000061436/ENSMUSG00000024529/ENSMUSG00000062352/ENSMUSG00000061665/ENSMUSG00000015599/…	100
GO:0048762	mesenchymal cell differentiation	139/7747	238/16212	0.584034	1.2222	3.30351	0.000597995	0.00739063	0.00522909	ENSMUSG00000022812/ENSMUSG00000068284/ENSMUSG00000033149/ENSMUSG00000045671/ENSMUSG00000020458/ENSMUSG00000006932/ENSMUSG00000031616/ENSMUSG00000051367/ENSMUSG00000021109/ENSMUSG00000027358/ENSMUSG00000064138/ENSMUSG00000005583/ENSMUSG00000039910/ENSMUSG00000045680/ENSMUSG00000030201/ENSMUSG00000021253/ENSMUSG00000027524/ENSMUSG00000008999/ENSMUSG00000005371/ENSMUSG00000062078/ENSMUSG00000025810/…	139
GO:0072091	regulation of stem cell proliferation	61/7747	94/16212	0.648936	1.35802	3.33019	0.000598596	0.00739063	0.00522909	ENSMUSG00000022510/ENSMUSG00000006932/ENSMUSG00000027356/ENSMUSG00000030201/ENSMUSG00000001517/ENSMUSG00000069895/ENSMUSG00000032419/ENSMUSG00000045394/ENSMUSG00000027859/ENSMUSG00000018604/ENSMUSG00000021466/ENSMUSG00000029655/ENSMUSG00000046470/ENSMUSG00000020681/ENSMUSG00000039153/ENSMUSG00000028842/ENSMUSG00000054321/ENSMUSG00000038909/ENSMUSG00000001288/ENSMUSG00000059552/ENSMUSG00000053110/…	61
GO:0046622	positive regulation of organ growth	41/7747	59/16212	0.694915	1.45424	3.34379	0.000600096	0.00739443	0.00523177	ENSMUSG00000001729/ENSMUSG00000021944/ENSMUSG00000005583/ENSMUSG00000024431/ENSMUSG00000030189/ENSMUSG00000036023/ENSMUSG00000042010/ENSMUSG00000005836/ENSMUSG00000059743/ENSMUSG00000039377/ENSMUSG00000031633/ENSMUSG00000019432/ENSMUSG00000001761/ENSMUSG00000053110/ENSMUSG00000021796/ENSMUSG00000005124/ENSMUSG00000032171/ENSMUSG00000020063/ENSMUSG00000024014/ENSMUSG00000053436/ENSMUSG00000039191/…	41
GO:0048024	regulation of mRNA splicing, via spliceosome	71/7747	112/16212	0.633929	1.32661	3.31806	0.000613063	0.00752679	0.00532542	ENSMUSG00000027763/ENSMUSG00000022185/ENSMUSG00000064138/ENSMUSG00000021210/ENSMUSG00000010608/ENSMUSG00000060475/ENSMUSG00000062078/ENSMUSG00000022120/ENSMUSG00000038398/ENSMUSG00000063919/ENSMUSG00000029538/ENSMUSG00000028790/ENSMUSG00000043962/ENSMUSG00000005506/ENSMUSG00000028409/ENSMUSG00000028330/ENSMUSG00000021047/ENSMUSG00000066107/ENSMUSG00000029439/ENSMUSG00000024097/ENSMUSG00000030411/…	71
GO:1901988	negative regulation of cell cycle phase transition	140/7747	240/16212	0.583333	1.22073	3.29569	0.000614209	0.00752679	0.00532542	ENSMUSG00000032409/ENSMUSG00000049502/ENSMUSG00000016984/ENSMUSG00000032555/ENSMUSG00000020380/ENSMUSG00000017843/ENSMUSG00000044548/ENSMUSG00000029414/ENSMUSG00000052934/ENSMUSG00000006585/ENSMUSG00000033596/ENSMUSG00000043733/ENSMUSG00000038379/ENSMUSG00000027510/ENSMUSG00000024151/ENSMUSG00000024283/ENSMUSG00000057329/ENSMUSG00000061288/ENSMUSG00000038542/ENSMUSG00000003032/ENSMUSG00000028495/…	140
GO:0008654	phospholipid biosynthetic process	115/7747	193/16212	0.595855	1.24693	3.30142	0.000614482	0.00752679	0.00532542	ENSMUSG00000037526/ENSMUSG00000004270/ENSMUSG00000058979/ENSMUSG00000006517/ENSMUSG00000036918/ENSMUSG00000023827/ENSMUSG00000075703/ENSMUSG00000026737/ENSMUSG00000040774/ENSMUSG00000055912/ENSMUSG00000040451/ENSMUSG00000028420/ENSMUSG00000000301/ENSMUSG00000024867/ENSMUSG00000025178/ENSMUSG00000026944/ENSMUSG00000020646/ENSMUSG00000040479/ENSMUSG00000019877/ENSMUSG00000027531/ENSMUSG00000028773/…	115
GO:0010811	positive regulation of cell-substrate adhesion	82/7747	132/16212	0.621212	1.3	3.31071	0.00061817	0.00753677	0.00533248	ENSMUSG00000022812/ENSMUSG00000063275/ENSMUSG00000026727/ENSMUSG00000040274/ENSMUSG00000021136/ENSMUSG00000027356/ENSMUSG00000042812/ENSMUSG00000043733/ENSMUSG00000025810/ENSMUSG00000014599/ENSMUSG00000019920/ENSMUSG00000029838/ENSMUSG00000062352/ENSMUSG00000024395/ENSMUSG00000057948/ENSMUSG00000023951/ENSMUSG00000040690/ENSMUSG00000025314/ENSMUSG00000027195/ENSMUSG00000001507/ENSMUSG00000058325/…	82
GO:0035878	nail development	7747-10-01	10/16212	1	2.09268	3.30649	0.000618944	0.00753677	0.00533248	ENSMUSG00000029513/ENSMUSG00000020758/ENSMUSG00000048450/ENSMUSG00000001655/ENSMUSG00000036158/ENSMUSG00000002057/ENSMUSG00000032852/ENSMUSG00000021469/ENSMUSG00000027111/ENSMUSG00000022297	10
GO:2000491	positive regulation of hepatic stellate cell activation	7747-10-01	10/16212	1	2.09268	3.30649	0.000618944	0.00753677	0.00533248	ENSMUSG00000019982/ENSMUSG00000024620/ENSMUSG00000035783/ENSMUSG00000059201/ENSMUSG00000001761/ENSMUSG00000026674/ENSMUSG00000031565/ENSMUSG00000003644/ENSMUSG00000000489/ENSMUSG00000022555	10
GO:0009064	glutamine family amino acid metabolic process	45/7747	66/16212	0.681818	1.42683	3.32392	0.000636798	0.00772382	0.00546483	ENSMUSG00000027737/ENSMUSG00000031672/ENSMUSG00000029361/ENSMUSG00000029524/ENSMUSG00000025007/ENSMUSG00000025190/ENSMUSG00000021794/ENSMUSG00000032350/ENSMUSG00000028633/ENSMUSG00000021185/ENSMUSG00000048217/ENSMUSG00000030934/ENSMUSG00000031360/ENSMUSG00000029992/ENSMUSG00000036892/ENSMUSG00000028124/ENSMUSG00000020899/ENSMUSG00000057228/ENSMUSG00000001155/ENSMUSG00000006345/ENSMUSG00000025533/…	45
GO:0061371	determination of heart left/right asymmetry	45/7747	66/16212	0.681818	1.42683	3.32392	0.000636798	0.00772382	0.00546483	ENSMUSG00000018395/ENSMUSG00000021109/ENSMUSG00000021944/ENSMUSG00000005583/ENSMUSG00000039910/ENSMUSG00000030201/ENSMUSG00000019969/ENSMUSG00000018604/ENSMUSG00000071350/ENSMUSG00000015605/ENSMUSG00000024294/ENSMUSG00000037335/ENSMUSG00000030699/ENSMUSG00000020888/ENSMUSG00000001761/ENSMUSG00000045039/ENSMUSG00000037171/ENSMUSG00000047248/ENSMUSG00000014773/ENSMUSG00000062327/ENSMUSG00000027878/…	45
GO:0030042	actin filament depolymerization	38/7747	54/16212	0.703704	1.47263	3.32798	0.000641446	0.00774987	0.00548325	ENSMUSG00000020315/ENSMUSG00000021262/ENSMUSG00000021061/ENSMUSG00000051586/ENSMUSG00000040852/ENSMUSG00000024236/ENSMUSG00000056737/ENSMUSG00000002812/ENSMUSG00000029840/ENSMUSG00000015932/ENSMUSG00000028328/ENSMUSG00000038976/ENSMUSG00000005103/ENSMUSG00000048096/ENSMUSG00000045180/ENSMUSG00000030000/ENSMUSG00000022451/ENSMUSG00000005628/ENSMUSG00000057738/ENSMUSG00000062929/ENSMUSG00000022099/…	38
GO:0030865	cortical cytoskeleton organization	38/7747	54/16212	0.703704	1.47263	3.32798	0.000641446	0.00774987	0.00548325	ENSMUSG00000019978/ENSMUSG00000043079/ENSMUSG00000024143/ENSMUSG00000052397/ENSMUSG00000014601/ENSMUSG00000020536/ENSMUSG00000036053/ENSMUSG00000004530/ENSMUSG00000020782/ENSMUSG00000005103/ENSMUSG00000022016/ENSMUSG00000020580/ENSMUSG00000030536/ENSMUSG00000073982/ENSMUSG00000028906/ENSMUSG00000049493/ENSMUSG00000022629/ENSMUSG00000020745/ENSMUSG00000028465/ENSMUSG00000015143/ENSMUSG00000021022/…	38
GO:0034620	cellular response to unfolded protein	53/7747	80/16212	0.6625	1.3864	3.31434	0.000644915	0.00777662	0.00550218	ENSMUSG00000026278/ENSMUSG00000040234/ENSMUSG00000075701/ENSMUSG00000054455/ENSMUSG00000031668/ENSMUSG00000041548/ENSMUSG00000026672/ENSMUSG00000053334/ENSMUSG00000020715/ENSMUSG00000027230/ENSMUSG00000032475/ENSMUSG00000021725/ENSMUSG00000022365/ENSMUSG00000015461/ENSMUSG00000002307/ENSMUSG00000057789/ENSMUSG00000040359/ENSMUSG00000026142/ENSMUSG00000005374/ENSMUSG00000039615/ENSMUSG00000031751/…	53
GO:0046824	positive regulation of nucleocytoplasmic transport	49/7747	73/16212	0.671233	1.40468	3.31504	0.000649978	0.00782245	0.00553461	ENSMUSG00000022812/ENSMUSG00000021270/ENSMUSG00000021096/ENSMUSG00000021057/ENSMUSG00000026778/ENSMUSG00000024454/ENSMUSG00000024604/ENSMUSG00000019969/ENSMUSG00000022774/ENSMUSG00000022469/ENSMUSG00000031451/ENSMUSG00000023944/ENSMUSG00000028790/ENSMUSG00000028333/ENSMUSG00000021179/ENSMUSG00000037523/ENSMUSG00000001552/ENSMUSG00000031328/ENSMUSG00000001964/ENSMUSG00000059201/ENSMUSG00000001761/…	49
GO:2000045	regulation of G1/S transition of mitotic cell cycle	89/7747	145/16212	0.613793	1.28447	3.29167	0.000654581	0.00786259	0.005563	ENSMUSG00000063275/ENSMUSG00000001729/ENSMUSG00000017843/ENSMUSG00000044548/ENSMUSG00000029438/ENSMUSG00000004266/ENSMUSG00000003031/ENSMUSG00000004446/ENSMUSG00000052934/ENSMUSG00000033596/ENSMUSG00000027510/ENSMUSG00000024283/ENSMUSG00000057329/ENSMUSG00000038482/ENSMUSG00000049285/ENSMUSG00000003032/ENSMUSG00000035960/ENSMUSG00000017412/ENSMUSG00000022105/ENSMUSG00000020644/ENSMUSG00000020653/…	89
GO:2000278	regulation of DNA biosynthetic process	67/7747	105/16212	0.638095	1.33533	3.29775	0.000663453	0.00795374	0.0056275	ENSMUSG00000032409/ENSMUSG00000026283/ENSMUSG00000022812/ENSMUSG00000007739/ENSMUSG00000006932/ENSMUSG00000026778/ENSMUSG00000024620/ENSMUSG00000030330/ENSMUSG00000031921/ENSMUSG00000014426/ENSMUSG00000029363/ENSMUSG00000038482/ENSMUSG00000024472/ENSMUSG00000028017/ENSMUSG00000023951/ENSMUSG00000028863/ENSMUSG00000055639/ENSMUSG00000038909/ENSMUSG00000030007/ENSMUSG00000026393/ENSMUSG00000027342/…	67
GO:0044786	cell cycle DNA replication	29/7747	39/16212	0.74359	1.5561	3.32618	0.000666799	0.00797842	0.00564496	ENSMUSG00000026309/ENSMUSG00000006585/ENSMUSG00000027502/ENSMUSG00000022673/ENSMUSG00000031669/ENSMUSG00000041859/ENSMUSG00000041147/ENSMUSG00000038685/ENSMUSG00000020752/ENSMUSG00000043207/ENSMUSG00000055639/ENSMUSG00000027342/ENSMUSG00000056394/ENSMUSG00000036875/ENSMUSG00000022960/ENSMUSG00000031565/ENSMUSG00000027454/ENSMUSG00000006715/ENSMUSG00000025574/ENSMUSG00000032078/ENSMUSG00000031229/…	29
GO:0033157	regulation of intracellular protein transport	96/7747	158/16212	0.607595	1.2715	3.28072	0.000674193	0.00803587	0.00568561	ENSMUSG00000022812/ENSMUSG00000051355/ENSMUSG00000020290/ENSMUSG00000018395/ENSMUSG00000018398/ENSMUSG00000021270/ENSMUSG00000021096/ENSMUSG00000034435/ENSMUSG00000021057/ENSMUSG00000027356/ENSMUSG00000026778/ENSMUSG00000050473/ENSMUSG00000024454/ENSMUSG00000024604/ENSMUSG00000043733/ENSMUSG00000019969/ENSMUSG00000028277/ENSMUSG00000006740/ENSMUSG00000022469/ENSMUSG00000031451/ENSMUSG00000038039/…	96
GO:0170039	proteinogenic amino acid metabolic process	96/7747	158/16212	0.607595	1.2715	3.28072	0.000674193	0.00803587	0.00568561	ENSMUSG00000026279/ENSMUSG00000027737/ENSMUSG00000011148/ENSMUSG00000037686/ENSMUSG00000021048/ENSMUSG00000030268/ENSMUSG00000029445/ENSMUSG00000021033/ENSMUSG00000004789/ENSMUSG00000000673/ENSMUSG00000029597/ENSMUSG00000031672/ENSMUSG00000054474/ENSMUSG00000029361/ENSMUSG00000020534/ENSMUSG00000033022/ENSMUSG00000029524/ENSMUSG00000062937/ENSMUSG00000025007/ENSMUSG00000025190/ENSMUSG00000021794/…	96
GO:1904951	positive regulation of establishment of protein localization	188/7747	332/16212	0.566265	1.18501	3.25838	0.000680372	0.00809214	0.00572542	ENSMUSG00000051980/ENSMUSG00000022812/ENSMUSG00000051355/ENSMUSG00000007739/ENSMUSG00000003161/ENSMUSG00000018395/ENSMUSG00000021270/ENSMUSG00000021096/ENSMUSG00000034435/ENSMUSG00000021109/ENSMUSG00000021057/ENSMUSG00000045502/ENSMUSG00000040234/ENSMUSG00000026778/ENSMUSG00000021587/ENSMUSG00000050473/ENSMUSG00000029468/ENSMUSG00000024454/ENSMUSG00000024604/ENSMUSG00000038346/ENSMUSG00000021253/…	188
GO:0031297	replication fork processing	32/7747	44/16212	0.727273	1.52195	3.31654	0.000682831	0.00809214	0.00572542	ENSMUSG00000032409/ENSMUSG00000034206/ENSMUSG00000016984/ENSMUSG00000020380/ENSMUSG00000055884/ENSMUSG00000035842/ENSMUSG00000033596/ENSMUSG00000037855/ENSMUSG00000041147/ENSMUSG00000038685/ENSMUSG00000019857/ENSMUSG00000028224/ENSMUSG00000041238/ENSMUSG00000027342/ENSMUSG00000039055/ENSMUSG00000039748/ENSMUSG00000045751/ENSMUSG00000036875/ENSMUSG00000022960/ENSMUSG00000009555/ENSMUSG00000032705/…	32
GO:0035137	hindlimb morphogenesis	32/7747	44/16212	0.727273	1.52195	3.31654	0.000682831	0.00809214	0.00572542	ENSMUSG00000022510/ENSMUSG00000006932/ENSMUSG00000030201/ENSMUSG00000027523/ENSMUSG00000018604/ENSMUSG00000021466/ENSMUSG00000028023/ENSMUSG00000048450/ENSMUSG00000001288/ENSMUSG00000021796/ENSMUSG00000031665/ENSMUSG00000033282/ENSMUSG00000026923/ENSMUSG00000021835/ENSMUSG00000051920/ENSMUSG00000024565/ENSMUSG00000066687/ENSMUSG00000038259/ENSMUSG00000021469/ENSMUSG00000050368/ENSMUSG00000043342/…	32
GO:0006457	protein folding	97/7747	160/16212	0.60625	1.26869	3.2674	0.000705429	0.00834398	0.00590361	ENSMUSG00000007739/ENSMUSG00000020288/ENSMUSG00000002190/ENSMUSG00000020361/ENSMUSG00000021270/ENSMUSG00000059970/ENSMUSG00000024350/ENSMUSG00000024346/ENSMUSG00000030357/ENSMUSG00000021037/ENSMUSG00000026740/ENSMUSG00000024359/ENSMUSG00000003226/ENSMUSG00000028416/ENSMUSG00000000826/ENSMUSG00000078622/ENSMUSG00000023944/ENSMUSG00000027274/ENSMUSG00000028651/ENSMUSG00000028641/ENSMUSG00000021868/…	97
GO:0046928	regulation of neurotransmitter secretion	63/7747	98/16212	0.642857	1.34529	3.27989	0.000712	0.00840567	0.00594725	ENSMUSG00000027765/ENSMUSG00000022829/ENSMUSG00000005583/ENSMUSG00000053025/ENSMUSG00000032776/ENSMUSG00000029468/ENSMUSG00000029467/ENSMUSG00000024617/ENSMUSG00000022462/ENSMUSG00000027524/ENSMUSG00000024127/ENSMUSG00000027859/ENSMUSG00000027895/ENSMUSG00000022789/ENSMUSG00000100241/ENSMUSG00000017412/ENSMUSG00000004113/ENSMUSG00000061878/ENSMUSG00000032890/ENSMUSG00000041670/ENSMUSG00000026452/…	63
GO:0090068	positive regulation of cell cycle process	146/7747	252/16212	0.579365	1.21243	3.25125	0.000714201	0.00841562	0.00595429	ENSMUSG00000022510/ENSMUSG00000001729/ENSMUSG00000018707/ENSMUSG00000059970/ENSMUSG00000019997/ENSMUSG00000029472/ENSMUSG00000029466/ENSMUSG00000024621/ENSMUSG00000024620/ENSMUSG00000030346/ENSMUSG00000035842/ENSMUSG00000045962/ENSMUSG00000027524/ENSMUSG00000055817/ENSMUSG00000024236/ENSMUSG00000024370/ENSMUSG00000027883/ENSMUSG00000027399/ENSMUSG00000053119/ENSMUSG00000009907/ENSMUSG00000032959/…	146
GO:0014909	smooth muscle cell migration	68/7747	107/16212	0.635514	1.32993	3.27559	0.000715765	0.00841804	0.00595601	ENSMUSG00000005583/ENSMUSG00000024620/ENSMUSG00000028284/ENSMUSG00000025810/ENSMUSG00000038418/ENSMUSG00000036564/ENSMUSG00000052920/ENSMUSG00000057329/ENSMUSG00000022469/ENSMUSG00000035960/ENSMUSG00000042121/ENSMUSG00000020681/ENSMUSG00000021699/ENSMUSG00000021756/ENSMUSG00000021822/ENSMUSG00000030043/ENSMUSG00000028128/ENSMUSG00000020611/ENSMUSG00000053819/ENSMUSG00000070047/ENSMUSG00000032501/…	68
GO:0021987	cerebral cortex development	79/7747	127/16212	0.622047	1.30175	3.26582	0.000726837	0.00853208	0.00603669	ENSMUSG00000022812/ENSMUSG00000020283/ENSMUSG00000020458/ENSMUSG00000006932/ENSMUSG00000037161/ENSMUSG00000021294/ENSMUSG00000021109/ENSMUSG00000069171/ENSMUSG00000005069/ENSMUSG00000030201/ENSMUSG00000022462/ENSMUSG00000019969/ENSMUSG00000028291/ENSMUSG00000028640/ENSMUSG00000040724/ENSMUSG00000040389/ENSMUSG00000031785/ENSMUSG00000033952/ENSMUSG00000041809/ENSMUSG00000026959/ENSMUSG00000062098/…	79
GO:0000387	spliceosomal snRNP assembly	24/7747	31/16212	0.774194	1.62014	3.30618	0.000731108	0.00853477	0.00603859	ENSMUSG00000027905/ENSMUSG00000018974/ENSMUSG00000002455/ENSMUSG00000040140/ENSMUSG00000002477/ENSMUSG00000037275/ENSMUSG00000040621/ENSMUSG00000057278/ENSMUSG00000049396/ENSMUSG00000015748/ENSMUSG00000027404/ENSMUSG00000060121/ENSMUSG00000055760/ENSMUSG00000021413/ENSMUSG00000060098/ENSMUSG00000024217/ENSMUSG00000021645/ENSMUSG00000032612/ENSMUSG00000033983/ENSMUSG00000031848/ENSMUSG00000025439/…	24
GO:1902473	regulation of protein localization to synapse	24/7747	31/16212	0.774194	1.62014	3.30618	0.000731108	0.00853477	0.00603859	ENSMUSG00000022812/ENSMUSG00000024617/ENSMUSG00000008153/ENSMUSG00000047368/ENSMUSG00000027799/ENSMUSG00000029053/ENSMUSG00000051790/ENSMUSG00000034160/ENSMUSG00000031302/ENSMUSG00000036902/ENSMUSG00000033389/ENSMUSG00000049044/ENSMUSG00000031119/ENSMUSG00000054693/ENSMUSG00000027164/ENSMUSG00000039952/ENSMUSG00000010066/ENSMUSG00000028678/ENSMUSG00000031988/ENSMUSG00000018411/ENSMUSG00000027692/…	24
GO:0051145	smooth muscle cell differentiation	50/7747	75/16212	0.666667	1.39512	3.28101	0.000731197	0.00853477	0.00603859	ENSMUSG00000026768/ENSMUSG00000006932/ENSMUSG00000031616/ENSMUSG00000051367/ENSMUSG00000005583/ENSMUSG00000024620/ENSMUSG00000049107/ENSMUSG00000042812/ENSMUSG00000032419/ENSMUSG00000006818/ENSMUSG00000062078/ENSMUSG00000024238/ENSMUSG00000024240/ENSMUSG00000018604/ENSMUSG00000028023/ENSMUSG00000023951/ENSMUSG00000015605/ENSMUSG00000040289/ENSMUSG00000005836/ENSMUSG00000001240/ENSMUSG00000004099/…	50
GO:0010563	negative regulation of phosphorus metabolic process	193/7747	342/16212	0.564327	1.18096	3.23563	0.000734468	0.00854077	0.00604284	ENSMUSG00000034422/ENSMUSG00000045671/ENSMUSG00000045658/ENSMUSG00000018899/ENSMUSG00000020361/ENSMUSG00000001729/ENSMUSG00000079055/ENSMUSG00000037526/ENSMUSG00000052221/ENSMUSG00000027358/ENSMUSG00000019850/ENSMUSG00000028300/ENSMUSG00000015133/ENSMUSG00000024427/ENSMUSG00000049107/ENSMUSG00000004266/ENSMUSG00000046733/ENSMUSG00000003031/ENSMUSG00000030201/ENSMUSG00000033430/ENSMUSG00000019969/…	193
GO:0045936	negative regulation of phosphate metabolic process	193/7747	342/16212	0.564327	1.18096	3.23563	0.000734468	0.00854077	0.00604284	ENSMUSG00000034422/ENSMUSG00000045671/ENSMUSG00000045658/ENSMUSG00000018899/ENSMUSG00000020361/ENSMUSG00000001729/ENSMUSG00000079055/ENSMUSG00000037526/ENSMUSG00000052221/ENSMUSG00000027358/ENSMUSG00000019850/ENSMUSG00000028300/ENSMUSG00000015133/ENSMUSG00000024427/ENSMUSG00000049107/ENSMUSG00000004266/ENSMUSG00000046733/ENSMUSG00000003031/ENSMUSG00000030201/ENSMUSG00000033430/ENSMUSG00000019969/…	193
GO:0000381	regulation of alternative mRNA splicing, via spliceosome	39/7747	56/16212	0.696429	1.4574	3.28008	0.000758556	0.00879709	0.0062242	ENSMUSG00000027763/ENSMUSG00000064138/ENSMUSG00000010608/ENSMUSG00000060475/ENSMUSG00000063919/ENSMUSG00000028790/ENSMUSG00000043962/ENSMUSG00000005506/ENSMUSG00000028409/ENSMUSG00000021047/ENSMUSG00000030411/ENSMUSG00000040459/ENSMUSG00000022858/ENSMUSG00000028137/ENSMUSG00000038374/ENSMUSG00000022897/ENSMUSG00000008658/ENSMUSG00000070780/ENSMUSG00000038132/ENSMUSG00000029249/ENSMUSG00000025576/…	39
GO:0045766	positive regulation of angiogenesis	92/7747	151/16212	0.609272	1.27501	3.24796	0.000759349	0.00879709	0.0062242	ENSMUSG00000020458/ENSMUSG00000031681/ENSMUSG00000031714/ENSMUSG00000021109/ENSMUSG00000021944/ENSMUSG00000021583/ENSMUSG00000030516/ENSMUSG00000036585/ENSMUSG00000045962/ENSMUSG00000004791/ENSMUSG00000033960/ENSMUSG00000025810/ENSMUSG00000027399/ENSMUSG00000022469/ENSMUSG00000003032/ENSMUSG00000015093/ENSMUSG00000061436/ENSMUSG00000061878/ENSMUSG00000023951/ENSMUSG00000005836/ENSMUSG00000042258/…	92
GO:0009743	response to carbohydrate	149/7747	258/16212	0.577519	1.20856	3.23052	0.000765728	0.00885445	0.00626478	ENSMUSG00000051980/ENSMUSG00000022708/ENSMUSG00000003161/ENSMUSG00000029388/ENSMUSG00000021109/ENSMUSG00000021587/ENSMUSG00000075701/ENSMUSG00000030516/ENSMUSG00000003031/ENSMUSG00000030168/ENSMUSG00000006585/ENSMUSG00000003849/ENSMUSG00000004788/ENSMUSG00000027513/ENSMUSG00000006818/ENSMUSG00000006740/ENSMUSG00000038418/ENSMUSG00000027399/ENSMUSG00000038894/ENSMUSG00000031451/ENSMUSG00000069805/…	149
GO:0006888	endoplasmic reticulum to Golgi vesicle-mediated transport	69/7747	109/16212	0.633028	1.32472	3.25412	0.000769964	0.00888684	0.0062877	ENSMUSG00000020149/ENSMUSG00000030245/ENSMUSG00000024487/ENSMUSG00000029616/ENSMUSG00000021248/ENSMUSG00000054455/ENSMUSG00000030304/ENSMUSG00000038648/ENSMUSG00000025607/ENSMUSG00000024068/ENSMUSG00000024072/ENSMUSG00000001052/ENSMUSG00000034893/ENSMUSG00000028779/ENSMUSG00000028847/ENSMUSG00000020952/ENSMUSG00000029125/ENSMUSG00000020386/ENSMUSG00000036391/ENSMUSG00000040236/ENSMUSG00000037075/…	69
GO:0090101	negative regulation of transmembrane receptor protein serine/threonine kinase signaling pathway	86/7747	140/16212	0.614286	1.2855	3.24563	0.000771628	0.0088895	0.00628957	ENSMUSG00000045671/ENSMUSG00000044674/ENSMUSG00000048118/ENSMUSG00000021096/ENSMUSG00000027358/ENSMUSG00000061048/ENSMUSG00000003316/ENSMUSG00000021253/ENSMUSG00000033014/ENSMUSG00000039985/ENSMUSG00000022114/ENSMUSG00000066900/ENSMUSG00000045969/ENSMUSG00000036580/ENSMUSG00000026668/ENSMUSG00000061436/ENSMUSG00000001870/ENSMUSG00000057236/ENSMUSG00000027831/ENSMUSG00000020519/ENSMUSG00000031353/…	86
GO:0061138	morphogenesis of a branching epithelium	122/7747	207/16212	0.589372	1.23337	3.23263	0.000775824	0.00890732	0.00630219	ENSMUSG00000022510/ENSMUSG00000051980/ENSMUSG00000006932/ENSMUSG00000031616/ENSMUSG00000064325/ENSMUSG00000051367/ENSMUSG00000027358/ENSMUSG00000030265/ENSMUSG00000045680/ENSMUSG00000036585/ENSMUSG00000030201/ENSMUSG00000042812/ENSMUSG00000004791/ENSMUSG00000016256/ENSMUSG00000008999/ENSMUSG00000028640/ENSMUSG00000025810/ENSMUSG00000027840/ENSMUSG00000018604/ENSMUSG00000014599/ENSMUSG00000026976/…	122
GO:0000280	nuclear division	227/7747	408/16212	0.556373	1.16431	3.21566	0.000776049	0.00890732	0.00630219	ENSMUSG00000022812/ENSMUSG00000043065/ENSMUSG00000020152/ENSMUSG00000036768/ENSMUSG00000032555/ENSMUSG00000033752/ENSMUSG00000054003/ENSMUSG00000055884/ENSMUSG00000021098/ENSMUSG00000059970/ENSMUSG00000029414/ENSMUSG00000041741/ENSMUSG00000041133/ENSMUSG00000029472/ENSMUSG00000029466/ENSMUSG00000024620/ENSMUSG00000003031/ENSMUSG00000030346/ENSMUSG00000024101/ENSMUSG00000006585/ENSMUSG00000032815/…	227
GO:0060420	regulation of heart growth	55/7747	84/16212	0.654762	1.37021	3.25427	0.000792777	0.0090825	0.00642613	ENSMUSG00000021944/ENSMUSG00000005583/ENSMUSG00000039910/ENSMUSG00000024431/ENSMUSG00000036023/ENSMUSG00000042010/ENSMUSG00000005836/ENSMUSG00000059743/ENSMUSG00000031400/ENSMUSG00000031633/ENSMUSG00000019432/ENSMUSG00000038530/ENSMUSG00000053110/ENSMUSG00000007613/ENSMUSG00000021796/ENSMUSG00000005124/ENSMUSG00000032171/ENSMUSG00000020063/ENSMUSG00000024014/ENSMUSG00000053436/ENSMUSG00000022865/…	55
GO:1904018	positive regulation of vasculature development	93/7747	153/16212	0.607843	1.27202	3.23406	0.00079571	0.00909928	0.006438	ENSMUSG00000020458/ENSMUSG00000031681/ENSMUSG00000031714/ENSMUSG00000021109/ENSMUSG00000021944/ENSMUSG00000021583/ENSMUSG00000030516/ENSMUSG00000036585/ENSMUSG00000045962/ENSMUSG00000004791/ENSMUSG00000033960/ENSMUSG00000025810/ENSMUSG00000027399/ENSMUSG00000022469/ENSMUSG00000003032/ENSMUSG00000015093/ENSMUSG00000061436/ENSMUSG00000061878/ENSMUSG00000023951/ENSMUSG00000005836/ENSMUSG00000042258/…	93
GO:0007041	lysosomal transport	75/7747	120/16212	0.625	1.30793	3.23884	0.000803333	0.00916081	0.00648154	ENSMUSG00000049502/ENSMUSG00000020128/ENSMUSG00000032536/ENSMUSG00000037526/ENSMUSG00000029434/ENSMUSG00000019998/ENSMUSG00000028300/ENSMUSG00000031731/ENSMUSG00000024107/ENSMUSG00000023830/ENSMUSG00000068747/ENSMUSG00000053119/ENSMUSG00000009907/ENSMUSG00000031447/ENSMUSG00000038039/ENSMUSG00000056234/ENSMUSG00000026024/ENSMUSG00000023393/ENSMUSG00000024065/ENSMUSG00000024319/ENSMUSG00000020740/…	75
GO:0006913	nucleocytoplasmic transport	186/7747	329/16212	0.56535	1.1831	3.20974	0.000805567	0.00916081	0.00648154	ENSMUSG00000022905/ENSMUSG00000022812/ENSMUSG00000020290/ENSMUSG00000001729/ENSMUSG00000021270/ENSMUSG00000021096/ENSMUSG00000021057/ENSMUSG00000027356/ENSMUSG00000038342/ENSMUSG00000026778/ENSMUSG00000066406/ENSMUSG00000006850/ENSMUSG00000024454/ENSMUSG00000024604/ENSMUSG00000004455/ENSMUSG00000038346/ENSMUSG00000003031/ENSMUSG00000045962/ENSMUSG00000033658/ENSMUSG00000043733/ENSMUSG00000019969/…	186
GO:0051169	nuclear transport	186/7747	329/16212	0.56535	1.1831	3.20974	0.000805567	0.00916081	0.00648154	ENSMUSG00000022905/ENSMUSG00000022812/ENSMUSG00000020290/ENSMUSG00000001729/ENSMUSG00000021270/ENSMUSG00000021096/ENSMUSG00000021057/ENSMUSG00000027356/ENSMUSG00000038342/ENSMUSG00000026778/ENSMUSG00000066406/ENSMUSG00000006850/ENSMUSG00000024454/ENSMUSG00000024604/ENSMUSG00000004455/ENSMUSG00000038346/ENSMUSG00000003031/ENSMUSG00000045962/ENSMUSG00000033658/ENSMUSG00000043733/ENSMUSG00000019969/…	186
GO:0035601	protein deacylation	36/7747	51/16212	0.705882	1.47719	3.26511	0.000808481	0.00916081	0.00648154	ENSMUSG00000033157/ENSMUSG00000045671/ENSMUSG00000024454/ENSMUSG00000054008/ENSMUSG00000022475/ENSMUSG00000040396/ENSMUSG00000029524/ENSMUSG00000047368/ENSMUSG00000056602/ENSMUSG00000031478/ENSMUSG00000028657/ENSMUSG00000029265/ENSMUSG00000030714/ENSMUSG00000031328/ENSMUSG00000050697/ENSMUSG00000020063/ENSMUSG00000041215/ENSMUSG00000022897/ENSMUSG00000015994/ENSMUSG00000033712/ENSMUSG00000032046/…	36
GO:0072666	establishment of protein localization to vacuole	36/7747	51/16212	0.705882	1.47719	3.26511	0.000808481	0.00916081	0.00648154	ENSMUSG00000020128/ENSMUSG00000026718/ENSMUSG00000066278/ENSMUSG00000037526/ENSMUSG00000019850/ENSMUSG00000024107/ENSMUSG00000068747/ENSMUSG00000038039/ENSMUSG00000056234/ENSMUSG00000031479/ENSMUSG00000020740/ENSMUSG00000027534/ENSMUSG00000028581/ENSMUSG00000019518/ENSMUSG00000033628/ENSMUSG00000032571/ENSMUSG00000078908/ENSMUSG00000069806/ENSMUSG00000033653/ENSMUSG00000043614/ENSMUSG00000017288/…	36
GO:0042391	regulation of membrane potential	250/7747	453/16212	0.551876	1.1549	3.19888	0.000815699	0.00922101	0.00652413	ENSMUSG00000022523/ENSMUSG00000025958/ENSMUSG00000026278/ENSMUSG00000051980/ENSMUSG00000022812/ENSMUSG00000022790/ENSMUSG00000045658/ENSMUSG00000032532/ENSMUSG00000001729/ENSMUSG00000040867/ENSMUSG00000079055/ENSMUSG00000030247/ENSMUSG00000030249/ENSMUSG00000005583/ENSMUSG00000039166/ENSMUSG00000029470/ENSMUSG00000029468/ENSMUSG00000029467/ENSMUSG00000000263/ENSMUSG00000030352/ENSMUSG00000042589/…	250
GO:1902108	regulation of mitochondrial membrane permeability involved in apoptotic process	27/7747	36/16212	0.75	1.56951	3.27247	0.000816769	0.00922101	0.00652413	ENSMUSG00000026278/ENSMUSG00000022812/ENSMUSG00000064326/ENSMUSG00000000915/ENSMUSG00000024617/ENSMUSG00000004446/ENSMUSG00000025933/ENSMUSG00000032350/ENSMUSG00000027282/ENSMUSG00000021771/ENSMUSG00000031633/ENSMUSG00000059552/ENSMUSG00000003541/ENSMUSG00000057789/ENSMUSG00000017686/ENSMUSG00000036880/ENSMUSG00000025733/ENSMUSG00000027381/ENSMUSG00000007659/ENSMUSG00000069041/ENSMUSG00000037826/…	27
GO:0006936	muscle contraction	163/7747	285/16212	0.57193	1.19687	3.20764	0.000821242	0.00925466	0.00654793	ENSMUSG00000020128/ENSMUSG00000003161/ENSMUSG00000031616/ENSMUSG00000021270/ENSMUSG00000079055/ENSMUSG00000021944/ENSMUSG00000030247/ENSMUSG00000030249/ENSMUSG00000019997/ENSMUSG00000030554/ENSMUSG00000028172/ENSMUSG00000029470/ENSMUSG00000029467/ENSMUSG00000000263/ENSMUSG00000027524/ENSMUSG00000018604/ENSMUSG00000052920/ENSMUSG00000029361/ENSMUSG00000041957/ENSMUSG00000028403/ENSMUSG00000028420/…	163
GO:0001570	vasculogenesis	60/7747	93/16212	0.645161	1.35012	3.23924	0.000825632	0.00928724	0.00657099	ENSMUSG00000020458/ENSMUSG00000006932/ENSMUSG00000021944/ENSMUSG00000039910/ENSMUSG00000036585/ENSMUSG00000024620/ENSMUSG00000001517/ENSMUSG00000042812/ENSMUSG00000062078/ENSMUSG00000025810/ENSMUSG00000022475/ENSMUSG00000046470/ENSMUSG00000024066/ENSMUSG00000028023/ENSMUSG00000025314/ENSMUSG00000040289/ENSMUSG00000007817/ENSMUSG00000034640/ENSMUSG00000049791/ENSMUSG00000062232/ENSMUSG00000042607/…	60
GO:0042552	myelination	101/7747	168/16212	0.60119	1.2581	3.21695	0.000835988	0.00936971	0.00662934	ENSMUSG00000040537/ENSMUSG00000006932/ENSMUSG00000001729/ENSMUSG00000079055/ENSMUSG00000049107/ENSMUSG00000030342/ENSMUSG00000033579/ENSMUSG00000004788/ENSMUSG00000062078/ENSMUSG00000075703/ENSMUSG00000050947/ENSMUSG00000031668/ENSMUSG00000037868/ENSMUSG00000055022/ENSMUSG00000028402/ENSMUSG00000026944/ENSMUSG00000029838/ENSMUSG00000020593/ENSMUSG00000059923/ENSMUSG00000020758/ENSMUSG00000023915/…	101
GO:1902905	positive regulation of supramolecular fiber organization	101/7747	168/16212	0.60119	1.2581	3.21695	0.000835988	0.00936971	0.00662934	ENSMUSG00000020388/ENSMUSG00000021262/ENSMUSG00000049550/ENSMUSG00000026778/ENSMUSG00000019997/ENSMUSG00000038524/ENSMUSG00000043079/ENSMUSG00000003031/ENSMUSG00000021253/ENSMUSG00000019969/ENSMUSG00000002365/ENSMUSG00000025810/ENSMUSG00000002233/ENSMUSG00000068744/ENSMUSG00000026782/ENSMUSG00000022469/ENSMUSG00000055717/ENSMUSG00000058624/ENSMUSG00000022105/ENSMUSG00000062352/ENSMUSG00000024068/…	101
GO:0000266	mitochondrial fission	33/7747	46/16212	0.717391	1.50127	3.25693	0.000841952	0.00941953	0.00666458	ENSMUSG00000037679/ENSMUSG00000019992/ENSMUSG00000024500/ENSMUSG00000031730/ENSMUSG00000022789/ENSMUSG00000018599/ENSMUSG00000020593/ENSMUSG00000027282/ENSMUSG00000039428/ENSMUSG00000009647/ENSMUSG00000024259/ENSMUSG00000029500/ENSMUSG00000019054/ENSMUSG00000031696/ENSMUSG00000033685/ENSMUSG00000040033/ENSMUSG00000061313/ENSMUSG00000062960/ENSMUSG00000005131/ENSMUSG00000019929/ENSMUSG00000023307/…	33
GO:0006040	amino sugar metabolic process	30/7747	41/16212	0.731707	1.53123	3.2581	0.000848951	0.00948072	0.00670788	ENSMUSG00000030282/ENSMUSG00000052102/ENSMUSG00000031952/ENSMUSG00000056131/ENSMUSG00000024172/ENSMUSG00000025176/ENSMUSG00000026956/ENSMUSG00000036820/ENSMUSG00000028479/ENSMUSG00000034744/ENSMUSG00000057337/ENSMUSG00000029992/ENSMUSG00000020346/ENSMUSG00000026670/ENSMUSG00000013846/ENSMUSG00000034160/ENSMUSG00000022885/ENSMUSG00000037347/ENSMUSG00000037722/ENSMUSG00000042684/ENSMUSG00000029209/…	30
GO:0030511	positive regulation of transforming growth factor beta receptor signaling pathway	22/7747	28/16212	0.785714	1.64425	3.26399	0.0008602	0.00953761	0.00674813	ENSMUSG00000026768/ENSMUSG00000027356/ENSMUSG00000039910/ENSMUSG00000025190/ENSMUSG00000061436/ENSMUSG00000023944/ENSMUSG00000026872/ENSMUSG00000063049/ENSMUSG00000024515/ENSMUSG00000024182/ENSMUSG00000022521/ENSMUSG00000040998/ENSMUSG00000032217/ENSMUSG00000028249/ENSMUSG00000030530/ENSMUSG00000029287/ENSMUSG00000055024/ENSMUSG00000003068/ENSMUSG00000019433/ENSMUSG00000024098/ENSMUSG00000024947/…	22
GO:0048596	embryonic camera-type eye morphogenesis	22/7747	28/16212	0.785714	1.64425	3.26399	0.0008602	0.00953761	0.00674813	ENSMUSG00000039910/ENSMUSG00000029475/ENSMUSG00000015134/ENSMUSG00000030201/ENSMUSG00000008999/ENSMUSG00000024238/ENSMUSG00000008730/ENSMUSG00000061436/ENSMUSG00000032327/ENSMUSG00000001280/ENSMUSG00000066043/ENSMUSG00000020170/ENSMUSG00000038402/ENSMUSG00000021359/ENSMUSG00000006538/ENSMUSG00000027109/ENSMUSG00000007880/ENSMUSG00000027168/ENSMUSG00000000093/ENSMUSG00000030323/ENSMUSG00000038564/…	22
GO:0051450	myoblast proliferation	22/7747	28/16212	0.785714	1.64425	3.26399	0.0008602	0.00953761	0.00674813	ENSMUSG00000006932/ENSMUSG00000051367/ENSMUSG00000024621/ENSMUSG00000032419/ENSMUSG00000025172/ENSMUSG00000005836/ENSMUSG00000048373/ENSMUSG00000027646/ENSMUSG00000028874/ENSMUSG00000002250/ENSMUSG00000022974/ENSMUSG00000028864/ENSMUSG00000004872/ENSMUSG00000026842/ENSMUSG00000027104/ENSMUSG00000028736/ENSMUSG00000027208/ENSMUSG00000040524/ENSMUSG00000009471/ENSMUSG00000053158/ENSMUSG00000063856/…	22
GO:1903846	positive regulation of cellular response to transforming growth factor beta stimulus	22/7747	28/16212	0.785714	1.64425	3.26399	0.0008602	0.00953761	0.00674813	ENSMUSG00000026768/ENSMUSG00000027356/ENSMUSG00000039910/ENSMUSG00000025190/ENSMUSG00000061436/ENSMUSG00000023944/ENSMUSG00000026872/ENSMUSG00000063049/ENSMUSG00000024515/ENSMUSG00000024182/ENSMUSG00000022521/ENSMUSG00000040998/ENSMUSG00000032217/ENSMUSG00000028249/ENSMUSG00000030530/ENSMUSG00000029287/ENSMUSG00000055024/ENSMUSG00000003068/ENSMUSG00000019433/ENSMUSG00000024098/ENSMUSG00000024947/…	22
GO:0030308	negative regulation of cell growth	102/7747	170/16212	0.6	1.25561	3.20501	0.000869946	0.00962844	0.0068124	ENSMUSG00000022508/ENSMUSG00000038845/ENSMUSG00000049800/ENSMUSG00000000861/ENSMUSG00000020458/ENSMUSG00000070509/ENSMUSG00000003031/ENSMUSG00000030168/ENSMUSG00000025810/ENSMUSG00000068744/ENSMUSG00000057329/ENSMUSG00000030309/ENSMUSG00000067336/ENSMUSG00000069805/ENSMUSG00000025020/ENSMUSG00000036580/ENSMUSG00000022105/ENSMUSG00000028657/ENSMUSG00000025314/ENSMUSG00000075028/ENSMUSG00000032547/…	102
GO:0048872	homeostasis of number of cells	206/7747	368/16212	0.559783	1.17145	3.18257	0.000876105	0.00967932	0.00684839	ENSMUSG00000022508/ENSMUSG00000022816/ENSMUSG00000020128/ENSMUSG00000054099/ENSMUSG00000040274/ENSMUSG00000032519/ENSMUSG00000032557/ENSMUSG00000027737/ENSMUSG00000018395/ENSMUSG00000001729/ENSMUSG00000064326/ENSMUSG00000037896/ENSMUSG00000048118/ENSMUSG00000021109/ENSMUSG00000021048/ENSMUSG00000045502/ENSMUSG00000022185/ENSMUSG00000030265/ENSMUSG00000005583/ENSMUSG00000039910/ENSMUSG00000019850/…	206
GO:0044282	small molecule catabolic process	192/7747	341/16212	0.56305	1.17828	3.18306	0.00087997	0.00970472	0.00686637	ENSMUSG00000037936/ENSMUSG00000020283/ENSMUSG00000003623/ENSMUSG00000045594/ENSMUSG00000001729/ENSMUSG00000021259/ENSMUSG00000030268/ENSMUSG00000029445/ENSMUSG00000020003/ENSMUSG00000052102/ENSMUSG00000057666/ENSMUSG00000004267/ENSMUSG00000005069/ENSMUSG00000009112/ENSMUSG00000042647/ENSMUSG00000019278/ENSMUSG00000031958/ENSMUSG00000021033/ENSMUSG00000004789/ENSMUSG00000021240/ENSMUSG00000052392/…	192
GO:0048534	hematopoietic or lymphoid organ development	71/7747	113/16212	0.628319	1.31487	3.21314	0.000883825	0.00972992	0.0068842	ENSMUSG00000006932/ENSMUSG00000031712/ENSMUSG00000048251/ENSMUSG00000051367/ENSMUSG00000033454/ENSMUSG00000039910/ENSMUSG00000019982/ENSMUSG00000045680/ENSMUSG00000030339/ENSMUSG00000097084/ENSMUSG00000019969/ENSMUSG00000057329/ENSMUSG00000038542/ENSMUSG00000017412/ENSMUSG00000039041/ENSMUSG00000022106/ENSMUSG00000020644/ENSMUSG00000028023/ENSMUSG00000061665/ENSMUSG00000015605/ENSMUSG00000043207/…	71
GO:0030166	proteoglycan biosynthetic process	40/7747	58/16212	0.689655	1.44323	3.23489	0.000886113	0.00973781	0.00688978	ENSMUSG00000006932/ENSMUSG00000032640/ENSMUSG00000054008/ENSMUSG00000041372/ENSMUSG00000097084/ENSMUSG00000067336/ENSMUSG00000043587/ENSMUSG00000037089/ENSMUSG00000042042/ENSMUSG00000062329/ENSMUSG00000051022/ENSMUSG00000039308/ENSMUSG00000057337/ENSMUSG00000020868/ENSMUSG00000052430/ENSMUSG00000037347/ENSMUSG00000026080/ENSMUSG00000039628/ENSMUSG00000029201/ENSMUSG00000033557/ENSMUSG00000036356/…	40
GO:0006790	sulfur compound metabolic process	180/7747	318/16212	0.566038	1.18454	3.17934	0.000896296	0.00982539	0.00695175	ENSMUSG00000022793/ENSMUSG00000020309/ENSMUSG00000003623/ENSMUSG00000006932/ENSMUSG00000032561/ENSMUSG00000031616/ENSMUSG00000031684/ENSMUSG00000027737/ENSMUSG00000020402/ENSMUSG00000021048/ENSMUSG00000021696/ENSMUSG00000037440/ENSMUSG00000032640/ENSMUSG00000054008/ENSMUSG00000041372/ENSMUSG00000006517/ENSMUSG00000015027/ENSMUSG00000019278/ENSMUSG00000031952/ENSMUSG00000021033/ENSMUSG00000004789/…	180
GO:0018210	peptidyl-threonine modification	61/7747	95/16212	0.642105	1.34372	3.21429	0.000897953	0.00982539	0.00695175	ENSMUSG00000022812/ENSMUSG00000045671/ENSMUSG00000001729/ENSMUSG00000024617/ENSMUSG00000045962/ENSMUSG00000033862/ENSMUSG00000038379/ENSMUSG00000057329/ENSMUSG00000022114/ENSMUSG00000061436/ENSMUSG00000026034/ENSMUSG00000028017/ENSMUSG00000061878/ENSMUSG00000015599/ENSMUSG00000059409/ENSMUSG00000041135/ENSMUSG00000020580/ENSMUSG00000053819/ENSMUSG00000000532/ENSMUSG00000024387/ENSMUSG00000041187/…	61
GO:0071774	response to fibroblast growth factor	66/7747	104/16212	0.634615	1.32805	3.21063	0.000899905	0.00982539	0.00695175	ENSMUSG00000051980/ENSMUSG00000006932/ENSMUSG00000064325/ENSMUSG00000090258/ENSMUSG00000019997/ENSMUSG00000024427/ENSMUSG00000036585/ENSMUSG00000054008/ENSMUSG00000043733/ENSMUSG00000022114/ENSMUSG00000032350/ENSMUSG00000058488/ENSMUSG00000062352/ENSMUSG00000059923/ENSMUSG00000051379/ENSMUSG00000039153/ENSMUSG00000027230/ENSMUSG00000001506/ENSMUSG00000048373/ENSMUSG00000040586/ENSMUSG00000028124/…	66
GO:0061448	connective tissue development	168/7747	295/16212	0.569492	1.19176	3.17984	0.000900423	0.00982539	0.00695175	ENSMUSG00000051980/ENSMUSG00000020467/ENSMUSG00000006932/ENSMUSG00000031681/ENSMUSG00000021109/ENSMUSG00000027966/ENSMUSG00000027358/ENSMUSG00000074794/ENSMUSG00000005583/ENSMUSG00000019997/ENSMUSG00000032640/ENSMUSG00000034320/ENSMUSG00000024620/ENSMUSG00000030201/ENSMUSG00000003316/ENSMUSG00000043733/ENSMUSG00000027523/ENSMUSG00000008999/ENSMUSG00000024247/ENSMUSG00000061013/ENSMUSG00000024238/…	168
GO:0048844	artery morphogenesis	52/7747	79/16212	0.658228	1.37746	3.21726	0.000908217	0.00989302	0.0069996	ENSMUSG00000020458/ENSMUSG00000006932/ENSMUSG00000031616/ENSMUSG00000051367/ENSMUSG00000039910/ENSMUSG00000024620/ENSMUSG00000042812/ENSMUSG00000025810/ENSMUSG00000067336/ENSMUSG00000001052/ENSMUSG00000023951/ENSMUSG00000015605/ENSMUSG00000027276/ENSMUSG00000040289/ENSMUSG00000007817/ENSMUSG00000001555/ENSMUSG00000001751/ENSMUSG00000032327/ENSMUSG00000000530/ENSMUSG00000029710/ENSMUSG00000002985/…	52

## Sheet: Supplementary File 1c
Supplementary File 1c: Enriched Gene Ontology terms for dunnart genes near enhancers
ID	Description	GeneRatio	BgRatio	RichFactor	FoldEnrichment	zScore	pvalue	p.adjust	qvalue	geneID	Count
GO:0048880	sensory system development	274/7589	418/16212	0.655502	1.40032	7.77882	4.32112e-15	2.68082e-11	1.88719e-11	ENSMUSG00000038119/ENSMUSG00000034708/ENSMUSG00000023175/ENSMUSG00000019428/ENSMUSG00000061780/ENSMUSG00000020235/ENSMUSG00000001911/ENSMUSG00000032187/ENSMUSG00000040726/ENSMUSG00000028174/ENSMUSG00000022330/ENSMUSG00000022286/ENSMUSG00000024049/ENSMUSG00000047407/ENSMUSG00000032796/ENSMUSG00000024098/ENSMUSG00000079415/ENSMUSG00000024913/ENSMUSG00000038765/ENSMUSG00000038718/ENSMUSG00000000247/…	274
GO:0043010	camera-type eye development	243/7589	366/16212	0.663934	1.41833	7.59395	1.80441e-14	3.4805e-11	2.45013e-11	ENSMUSG00000038119/ENSMUSG00000034708/ENSMUSG00000023175/ENSMUSG00000019428/ENSMUSG00000061780/ENSMUSG00000020235/ENSMUSG00000001911/ENSMUSG00000032187/ENSMUSG00000040726/ENSMUSG00000028174/ENSMUSG00000022330/ENSMUSG00000022286/ENSMUSG00000024049/ENSMUSG00000047407/ENSMUSG00000032796/ENSMUSG00000024098/ENSMUSG00000079415/ENSMUSG00000024913/ENSMUSG00000038765/ENSMUSG00000000247/ENSMUSG00000020122/…	243
GO:0001654	eye development	267/7589	409/16212	0.652812	1.39457	7.58198	2.04676e-14	3.4805e-11	2.45013e-11	ENSMUSG00000038119/ENSMUSG00000034708/ENSMUSG00000023175/ENSMUSG00000019428/ENSMUSG00000061780/ENSMUSG00000020235/ENSMUSG00000001911/ENSMUSG00000032187/ENSMUSG00000040726/ENSMUSG00000028174/ENSMUSG00000022330/ENSMUSG00000022286/ENSMUSG00000024049/ENSMUSG00000047407/ENSMUSG00000032796/ENSMUSG00000024098/ENSMUSG00000079415/ENSMUSG00000024913/ENSMUSG00000038765/ENSMUSG00000038718/ENSMUSG00000000247/…	267
GO:0150063	visual system development	268/7589	411/16212	0.652068	1.39298	7.57038	2.24404e-14	3.4805e-11	2.45013e-11	ENSMUSG00000038119/ENSMUSG00000034708/ENSMUSG00000023175/ENSMUSG00000019428/ENSMUSG00000061780/ENSMUSG00000020235/ENSMUSG00000001911/ENSMUSG00000032187/ENSMUSG00000040726/ENSMUSG00000028174/ENSMUSG00000022330/ENSMUSG00000022286/ENSMUSG00000024049/ENSMUSG00000047407/ENSMUSG00000032796/ENSMUSG00000024098/ENSMUSG00000079415/ENSMUSG00000024913/ENSMUSG00000038765/ENSMUSG00000038718/ENSMUSG00000000247/…	268
GO:0008015	blood circulation	300/7589	481/16212	0.623701	1.33238	6.94221	2.49943e-12	3.10129e-09	2.18319e-09	ENSMUSG00000032034/ENSMUSG00000016087/ENSMUSG00000061086/ENSMUSG00000034520/ENSMUSG00000009545/ENSMUSG00000034781/ENSMUSG00000031849/ENSMUSG00000034845/ENSMUSG00000031791/ENSMUSG00000034881/ENSMUSG00000034917/ENSMUSG00000034533/ENSMUSG00000040086/ENSMUSG00000007097/ENSMUSG00000031980/ENSMUSG00000051359/ENSMUSG00000024053/ENSMUSG00000110195/ENSMUSG00000027077/ENSMUSG00000024942/ENSMUSG00000024913/…	300
GO:0031329	regulation of cellular catabolic process	237/7589	367/16212	0.645777	1.37954	6.89942	3.29175e-12	3.40367e-09	2.39605e-09	ENSMUSG00000018411/ENSMUSG00000020932/ENSMUSG00000031078/ENSMUSG00000019428/ENSMUSG00000035242/ENSMUSG00000003068/ENSMUSG00000011305/ENSMUSG00000047123/ENSMUSG00000032193/ENSMUSG00000028618/ENSMUSG00000044254/ENSMUSG00000028518/ENSMUSG00000057722/ENSMUSG00000023460/ENSMUSG00000052105/ENSMUSG00000024958/ENSMUSG00000024900/ENSMUSG00000038765/ENSMUSG00000028007/ENSMUSG00000030317/ENSMUSG00000030314/…	237
GO:0060537	muscle tissue development	285/7589	458/16212	0.622271	1.32933	6.70704	1.29304e-11	1.10573e-08	7.7839e-09	ENSMUSG00000032033/ENSMUSG00000038119/ENSMUSG00000034520/ENSMUSG00000031077/ENSMUSG00000031074/ENSMUSG00000031622/ENSMUSG00000001911/ENSMUSG00000006235/ENSMUSG00000062908/ENSMUSG00000007122/ENSMUSG00000031980/ENSMUSG00000031972/ENSMUSG00000022306/ENSMUSG00000024049/ENSMUSG00000024099/ENSMUSG00000026185/ENSMUSG00000030315/ENSMUSG00000030314/ENSMUSG00000031965/ENSMUSG00000027660/ENSMUSG00000022996/…	285
GO:0016055	Wnt signaling pathway	251/7589	396/16212	0.633838	1.35404	6.69139	1.42583e-11	1.10573e-08	7.7839e-09	ENSMUSG00000000125/ENSMUSG00000018486/ENSMUSG00000050288/ENSMUSG00000021994/ENSMUSG00000003345/ENSMUSG00000020135/ENSMUSG00000003068/ENSMUSG00000004934/ENSMUSG00000032187/ENSMUSG00000028517/ENSMUSG00000028518/ENSMUSG00000040726/ENSMUSG00000035305/ENSMUSG00000028173/ENSMUSG00000032497/ENSMUSG00000050447/ENSMUSG00000026556/ENSMUSG00000037487/ENSMUSG00000022297/ENSMUSG00000024740/ENSMUSG00000024969/…	251
GO:0042692	muscle cell differentiation	271/7589	435/16212	0.622989	1.33086	6.56211	3.46135e-11	2.38602e-08	1.67967e-08	ENSMUSG00000033453/ENSMUSG00000032033/ENSMUSG00000038119/ENSMUSG00000006498/ENSMUSG00000031849/ENSMUSG00000061780/ENSMUSG00000002833/ENSMUSG00000005824/ENSMUSG00000032187/ENSMUSG00000028179/ENSMUSG00000062908/ENSMUSG00000007122/ENSMUSG00000026556/ENSMUSG00000031980/ENSMUSG00000031972/ENSMUSG00000024049/ENSMUSG00000032796/ENSMUSG00000044338/ENSMUSG00000026185/ENSMUSG00000037966/ENSMUSG00000030314/…	271
GO:0007409	axonogenesis	281/7589	455/16212	0.617582	1.31931	6.48112	5.96253e-11	3.69916e-08	2.60406e-08	ENSMUSG00000031996/ENSMUSG00000041444/ENSMUSG00000032128/ENSMUSG00000018411/ENSMUSG00000000125/ENSMUSG00000031078/ENSMUSG00000045776/ENSMUSG00000021994/ENSMUSG00000003070/ENSMUSG00000003068/ENSMUSG00000038146/ENSMUSG00000034902/ENSMUSG00000035027/ENSMUSG00000001227/ENSMUSG00000013236/ENSMUSG00000034656/ENSMUSG00000001911/ENSMUSG00000033335/ENSMUSG00000028519/ENSMUSG00000028556/ENSMUSG00000034115/…	281
GO:0014706	striated muscle tissue development	270/7589	437/16212	0.617849	1.31988	6.35932	1.32923e-10	7.49687e-08	5.2775e-08	ENSMUSG00000032033/ENSMUSG00000038119/ENSMUSG00000034520/ENSMUSG00000031077/ENSMUSG00000031074/ENSMUSG00000031622/ENSMUSG00000001911/ENSMUSG00000006235/ENSMUSG00000062908/ENSMUSG00000007122/ENSMUSG00000031980/ENSMUSG00000031972/ENSMUSG00000022306/ENSMUSG00000024049/ENSMUSG00000024099/ENSMUSG00000030315/ENSMUSG00000030314/ENSMUSG00000031965/ENSMUSG00000027660/ENSMUSG00000022996/ENSMUSG00000025278/…	270
GO:0060562	epithelial tube morphogenesis	223/7589	354/16212	0.629944	1.34572	6.16972	4.48376e-10	2.31811e-07	1.63185e-07	ENSMUSG00000031995/ENSMUSG00000018486/ENSMUSG00000031074/ENSMUSG00000023175/ENSMUSG00000021994/ENSMUSG00000036180/ENSMUSG00000040726/ENSMUSG00000026556/ENSMUSG00000031980/ENSMUSG00000022286/ENSMUSG00000022297/ENSMUSG00000047407/ENSMUSG00000032796/ENSMUSG00000044338/ENSMUSG00000054611/ENSMUSG00000024913/ENSMUSG00000000247/ENSMUSG00000030323/ENSMUSG00000031965/ENSMUSG00000027676/ENSMUSG00000002633/…	223
GO:0030111	regulation of Wnt signaling pathway	185/7589	286/16212	0.646853	1.38184	6.11194	6.39386e-10	3.05135e-07	2.14803e-07	ENSMUSG00000000125/ENSMUSG00000021994/ENSMUSG00000003345/ENSMUSG00000020135/ENSMUSG00000003068/ENSMUSG00000032187/ENSMUSG00000028517/ENSMUSG00000028173/ENSMUSG00000050447/ENSMUSG00000026556/ENSMUSG00000037487/ENSMUSG00000022297/ENSMUSG00000024816/ENSMUSG00000026883/ENSMUSG00000020122/ENSMUSG00000037989/ENSMUSG00000021381/ENSMUSG00000030079/ENSMUSG00000030087/ENSMUSG00000030315/ENSMUSG00000027630/…	185
GO:0090596	sensory organ morphogenesis	191/7589	297/16212	0.643098	1.37382	6.09961	6.93018e-10	3.07106e-07	2.1619e-07	ENSMUSG00000038119/ENSMUSG00000050288/ENSMUSG00000009545/ENSMUSG00000031074/ENSMUSG00000021994/ENSMUSG00000054708/ENSMUSG00000040726/ENSMUSG00000026556/ENSMUSG00000022330/ENSMUSG00000022297/ENSMUSG00000079415/ENSMUSG00000024913/ENSMUSG00000015053/ENSMUSG00000030324/ENSMUSG00000030323/ENSMUSG00000030302/ENSMUSG00000037643/ENSMUSG00000043850/ENSMUSG00000045294/ENSMUSG00000002633/ENSMUSG00000030116/…	191
GO:0048568	embryonic organ development	290/7589	481/16212	0.602911	1.28797	6.01459	1.18539e-09	4.90275e-07	3.45134e-07	ENSMUSG00000031995/ENSMUSG00000018486/ENSMUSG00000050288/ENSMUSG00000009545/ENSMUSG00000031074/ENSMUSG00000021994/ENSMUSG00000032714/ENSMUSG00000054708/ENSMUSG00000032187/ENSMUSG00000040726/ENSMUSG00000032512/ENSMUSG00000026556/ENSMUSG00000022330/ENSMUSG00000022286/ENSMUSG00000022297/ENSMUSG00000022306/ENSMUSG00000044338/ENSMUSG00000054611/ENSMUSG00000034957/ENSMUSG00000038718/ENSMUSG00000028821/…	290
GO:0060541	respiratory system development	165/7589	252/16212	0.654762	1.39874	5.98461	1.40688e-09	5.1764e-07	3.64398e-07	ENSMUSG00000031075/ENSMUSG00000021994/ENSMUSG00000035027/ENSMUSG00000040726/ENSMUSG00000026556/ENSMUSG00000022285/ENSMUSG00000022286/ENSMUSG00000022306/ENSMUSG00000032796/ENSMUSG00000026185/ENSMUSG00000034957/ENSMUSG00000020122/ENSMUSG00000061393/ENSMUSG00000039286/ENSMUSG00000027676/ENSMUSG00000028978/ENSMUSG00000002633/ENSMUSG00000030218/ENSMUSG00000017697/ENSMUSG00000030849/ENSMUSG00000064246/…	165
GO:0001503	ossification	243/7589	394/16212	0.616751	1.31753	5.98593	1.41842e-09	5.1764e-07	3.64398e-07	ENSMUSG00000000125/ENSMUSG00000025489/ENSMUSG00000020325/ENSMUSG00000031849/ENSMUSG00000021994/ENSMUSG00000035673/ENSMUSG00000001911/ENSMUSG00000022330/ENSMUSG00000037465/ENSMUSG00000024098/ENSMUSG00000026185/ENSMUSG00000024913/ENSMUSG00000001802/ENSMUSG00000034957/ENSMUSG00000061393/ENSMUSG00000039323/ENSMUSG00000000440/ENSMUSG00000039286/ENSMUSG00000022996/ENSMUSG00000036334/ENSMUSG00000002633/…	243
GO:0043410	positive regulation of MAPK cascade	274/7589	452/16212	0.606195	1.29498	5.96701	1.59041e-09	5.48162e-07	3.85884e-07	ENSMUSG00000032041/ENSMUSG00000038119/ENSMUSG00000020689/ENSMUSG00000031074/ENSMUSG00000050917/ENSMUSG00000020327/ENSMUSG00000021994/ENSMUSG00000015312/ENSMUSG00000035722/ENSMUSG00000019579/ENSMUSG00000006235/ENSMUSG00000032508/ENSMUSG00000057722/ENSMUSG00000026556/ENSMUSG00000031980/ENSMUSG00000079415/ENSMUSG00000026883/ENSMUSG00000026879/ENSMUSG00000020122/ENSMUSG00000030093/ENSMUSG00000031963/…	274
GO:0045927	positive regulation of growth	179/7589	278/16212	0.643885	1.3755	5.9243	2.05571e-09	6.71244e-07	4.72529e-07	ENSMUSG00000041444/ENSMUSG00000018411/ENSMUSG00000000125/ENSMUSG00000021994/ENSMUSG00000002833/ENSMUSG00000028524/ENSMUSG00000038708/ENSMUSG00000031980/ENSMUSG00000022306/ENSMUSG00000079415/ENSMUSG00000038696/ENSMUSG00000020122/ENSMUSG00000030270/ENSMUSG00000031965/ENSMUSG00000051136/ENSMUSG00000031278/ENSMUSG00000035277/ENSMUSG00000034259/ENSMUSG00000022556/ENSMUSG00000022607/ENSMUSG00000045382/…	179
GO:0060840	artery development	87/7589	118/16212	0.737288	1.57503	5.88124	2.26837e-09	7.03649e-07	4.95341e-07	ENSMUSG00000031849/ENSMUSG00000038146/ENSMUSG00000032193/ENSMUSG00000032187/ENSMUSG00000033335/ENSMUSG00000028553/ENSMUSG00000034115/ENSMUSG00000110195/ENSMUSG00000044338/ENSMUSG00000057110/ENSMUSG00000061393/ENSMUSG00000002633/ENSMUSG00000033837/ENSMUSG00000045382/ENSMUSG00000029146/ENSMUSG00000027661/ENSMUSG00000010175/ENSMUSG00000030022/ENSMUSG00000039239/ENSMUSG00000020458/ENSMUSG00000006932/…	87
GO:0007517	muscle organ development	211/7589	337/16212	0.626113	1.33753	5.87412	2.80666e-09	8.29167e-07	5.837e-07	ENSMUSG00000032033/ENSMUSG00000038119/ENSMUSG00000050288/ENSMUSG00000031074/ENSMUSG00000031622/ENSMUSG00000002833/ENSMUSG00000001911/ENSMUSG00000006235/ENSMUSG00000034115/ENSMUSG00000007122/ENSMUSG00000026556/ENSMUSG00000031972/ENSMUSG00000022306/ENSMUSG00000024049/ENSMUSG00000027077/ENSMUSG00000079415/ENSMUSG00000031965/ENSMUSG00000027660/ENSMUSG00000022996/ENSMUSG00000027680/ENSMUSG00000025278/…	211
GO:0045165	cell fate commitment	176/7589	274/16212	0.642336	1.37219	5.82895	3.67051e-09	1.03508e-06	7.28657e-07	ENSMUSG00000038119/ENSMUSG00000000125/ENSMUSG00000018486/ENSMUSG00000019428/ENSMUSG00000020167/ENSMUSG00000021994/ENSMUSG00000020135/ENSMUSG00000024002/ENSMUSG00000038146/ENSMUSG00000036180/ENSMUSG00000001911/ENSMUSG00000032187/ENSMUSG00000028556/ENSMUSG00000053318/ENSMUSG00000026890/ENSMUSG00000030093/ENSMUSG00000015053/ENSMUSG00000000440/ENSMUSG00000031965/ENSMUSG00000022996/ENSMUSG00000002633/…	176
GO:1990778	protein localization to cell periphery	230/7589	373/16212	0.616622	1.31726	5.8153	3.99868e-09	1.0786e-06	7.59292e-07	ENSMUSG00000034187/ENSMUSG00000037519/ENSMUSG00000035863/ENSMUSG00000023175/ENSMUSG00000028618/ENSMUSG00000073791/ENSMUSG00000032513/ENSMUSG00000028176/ENSMUSG00000038708/ENSMUSG00000056515/ENSMUSG00000041488/ENSMUSG00000024816/ENSMUSG00000020122/ENSMUSG00000079477/ENSMUSG00000030098/ENSMUSG00000030298/ENSMUSG00000037643/ENSMUSG00000027692/ENSMUSG00000051136/ENSMUSG00000040760/ENSMUSG00000021870/…	230
GO:0009896	positive regulation of catabolic process	292/7589	489/16212	0.597137	1.27563	5.80614	4.19243e-09	1.08374e-06	7.62912e-07	ENSMUSG00000032040/ENSMUSG00000034187/ENSMUSG00000058301/ENSMUSG00000021994/ENSMUSG00000035242/ENSMUSG00000004937/ENSMUSG00000003068/ENSMUSG00000020235/ENSMUSG00000011305/ENSMUSG00000047123/ENSMUSG00000007670/ENSMUSG00000032193/ENSMUSG00000028618/ENSMUSG00000044254/ENSMUSG00000028518/ENSMUSG00000028553/ENSMUSG00000036913/ENSMUSG00000022283/ENSMUSG00000023460/ENSMUSG00000046139/ENSMUSG00000024740/…	292
GO:0030900	forebrain development	254/7589	418/16212	0.607656	1.2981	5.79266	4.56703e-09	1.13335e-06	7.97835e-07	ENSMUSG00000031996/ENSMUSG00000032036/ENSMUSG00000038119/ENSMUSG00000021994/ENSMUSG00000003070/ENSMUSG00000038146/ENSMUSG00000001227/ENSMUSG00000013236/ENSMUSG00000001911/ENSMUSG00000032187/ENSMUSG00000028519/ENSMUSG00000028556/ENSMUSG00000040726/ENSMUSG00000007097/ENSMUSG00000024098/ENSMUSG00000037984/ENSMUSG00000050896/ENSMUSG00000000247/ENSMUSG00000026890/ENSMUSG00000026883/ENSMUSG00000018189/…	254
GO:0061138	morphogenesis of a branching epithelium	138/7589	207/16212	0.666667	1.42417	5.76185	5.39835e-09	1.28813e-06	9.06792e-07	ENSMUSG00000031995/ENSMUSG00000018486/ENSMUSG00000021994/ENSMUSG00000026556/ENSMUSG00000031980/ENSMUSG00000022286/ENSMUSG00000032796/ENSMUSG00000024913/ENSMUSG00000030084/ENSMUSG00000031965/ENSMUSG00000002633/ENSMUSG00000030218/ENSMUSG00000045382/ENSMUSG00000018209/ENSMUSG00000030849/ENSMUSG00000016529/ENSMUSG00000010175/ENSMUSG00000022770/ENSMUSG00000022510/ENSMUSG00000051980/ENSMUSG00000006932/…	138
GO:0072659	protein localization to plasma membrane	183/7589	288/16212	0.635417	1.35741	5.74121	6.21641e-09	1.42839e-06	1.00553e-06	ENSMUSG00000034187/ENSMUSG00000037519/ENSMUSG00000035863/ENSMUSG00000023175/ENSMUSG00000028618/ENSMUSG00000032513/ENSMUSG00000028176/ENSMUSG00000038708/ENSMUSG00000056515/ENSMUSG00000041488/ENSMUSG00000024816/ENSMUSG00000020122/ENSMUSG00000079477/ENSMUSG00000030098/ENSMUSG00000030298/ENSMUSG00000037643/ENSMUSG00000027692/ENSMUSG00000040760/ENSMUSG00000021870/ENSMUSG00000061576/ENSMUSG00000022568/…	183
GO:0060485	mesenchyme development	186/7589	294/16212	0.632653	1.3515	5.70596	7.66071e-09	1.69739e-06	1.1949e-06	ENSMUSG00000021994/ENSMUSG00000001227/ENSMUSG00000040651/ENSMUSG00000026556/ENSMUSG00000031980/ENSMUSG00000039509/ENSMUSG00000031972/ENSMUSG00000044338/ENSMUSG00000026883/ENSMUSG00000031965/ENSMUSG00000029687/ENSMUSG00000028978/ENSMUSG00000002633/ENSMUSG00000022607/ENSMUSG00000026383/ENSMUSG00000024975/ENSMUSG00000024985/ENSMUSG00000030849/ENSMUSG00000026193/ENSMUSG00000039239/ENSMUSG00000030031/…	186
GO:0003012	muscle system process	245/7589	403/16212	0.60794	1.29871	5.69668	8.05902e-09	1.72407e-06	1.21368e-06	ENSMUSG00000032034/ENSMUSG00000061086/ENSMUSG00000009545/ENSMUSG00000031078/ENSMUSG00000031849/ENSMUSG00000031791/ENSMUSG00000031799/ENSMUSG00000034881/ENSMUSG00000034115/ENSMUSG00000034533/ENSMUSG00000040086/ENSMUSG00000007097/ENSMUSG00000007122/ENSMUSG00000031980/ENSMUSG00000031972/ENSMUSG00000039233/ENSMUSG00000024049/ENSMUSG00000027071/ENSMUSG00000026185/ENSMUSG00000047250/ENSMUSG00000026879/…	245
GO:0007264	small GTPase-mediated signal transduction	244/7589	402/16212	0.606965	1.29663	5.64975	1.05989e-08	2.16281e-06	1.52253e-06	ENSMUSG00000041444/ENSMUSG00000038119/ENSMUSG00000032413/ENSMUSG00000035697/ENSMUSG00000052142/ENSMUSG00000032714/ENSMUSG00000036120/ENSMUSG00000034116/ENSMUSG00000001911/ENSMUSG00000032198/ENSMUSG00000033335/ENSMUSG00000034926/ENSMUSG00000021895/ENSMUSG00000028519/ENSMUSG00000028556/ENSMUSG00000034226/ENSMUSG00000026556/ENSMUSG00000036913/ENSMUSG00000019478/ENSMUSG00000039960/ENSMUSG00000001995/…	244
GO:0043583	ear development	159/7589	246/16212	0.646341	1.38075	5.64513	1.09135e-08	2.16281e-06	1.52253e-06	ENSMUSG00000050288/ENSMUSG00000009545/ENSMUSG00000031074/ENSMUSG00000021994/ENSMUSG00000054708/ENSMUSG00000001911/ENSMUSG00000040726/ENSMUSG00000035305/ENSMUSG00000026556/ENSMUSG00000022330/ENSMUSG00000022297/ENSMUSG00000034957/ENSMUSG00000044667/ENSMUSG00000031963/ENSMUSG00000015053/ENSMUSG00000002870/ENSMUSG00000030302/ENSMUSG00000043850/ENSMUSG00000045294/ENSMUSG00000002633/ENSMUSG00000022568/…	159
GO:0010720	positive regulation of cell development	296/7589	500/16212	0.592	1.26466	5.6393	1.11557e-08	2.16281e-06	1.52253e-06	ENSMUSG00000041444/ENSMUSG00000038119/ENSMUSG00000020689/ENSMUSG00000018411/ENSMUSG00000000125/ENSMUSG00000020932/ENSMUSG00000031077/ENSMUSG00000021994/ENSMUSG00000020198/ENSMUSG00000003068/ENSMUSG00000024002/ENSMUSG00000007594/ENSMUSG00000035027/ENSMUSG00000035678/ENSMUSG00000032187/ENSMUSG00000028173/ENSMUSG00000038708/ENSMUSG00000037465/ENSMUSG00000024735/ENSMUSG00000020122/ENSMUSG00000037966/…	296
GO:0003007	heart morphogenesis	170/7589	266/16212	0.639098	1.36527	5.63508	1.15972e-08	2.18028e-06	1.53483e-06	ENSMUSG00000050288/ENSMUSG00000021994/ENSMUSG00000006235/ENSMUSG00000032187/ENSMUSG00000026556/ENSMUSG00000022286/ENSMUSG00000022306/ENSMUSG00000044338/ENSMUSG00000054611/ENSMUSG00000031965/ENSMUSG00000027676/ENSMUSG00000028978/ENSMUSG00000028949/ENSMUSG00000002633/ENSMUSG00000033837/ENSMUSG00000038564/ENSMUSG00000043639/ENSMUSG00000024975/ENSMUSG00000030849/ENSMUSG00000010175/ENSMUSG00000039239/…	170
GO:0001763	morphogenesis of a branching structure	146/7589	223/16212	0.654709	1.39862	5.62302	1.23709e-08	2.25733e-06	1.58907e-06	ENSMUSG00000031995/ENSMUSG00000018486/ENSMUSG00000021994/ENSMUSG00000026556/ENSMUSG00000031980/ENSMUSG00000022286/ENSMUSG00000032796/ENSMUSG00000024913/ENSMUSG00000030084/ENSMUSG00000031965/ENSMUSG00000002633/ENSMUSG00000030218/ENSMUSG00000045382/ENSMUSG00000018209/ENSMUSG00000030849/ENSMUSG00000016529/ENSMUSG00000010175/ENSMUSG00000022770/ENSMUSG00000022510/ENSMUSG00000051980/ENSMUSG00000000861/…	146
GO:0031346	positive regulation of cell projection organization	252/7589	418/16212	0.602871	1.28788	5.59404	1.46053e-08	2.58889e-06	1.82248e-06	ENSMUSG00000041444/ENSMUSG00000032128/ENSMUSG00000018411/ENSMUSG00000000125/ENSMUSG00000034247/ENSMUSG00000034708/ENSMUSG00000025147/ENSMUSG00000006498/ENSMUSG00000035863/ENSMUSG00000003575/ENSMUSG00000021994/ENSMUSG00000035486/ENSMUSG00000003068/ENSMUSG00000035027/ENSMUSG00000006235/ENSMUSG00000033335/ENSMUSG00000035305/ENSMUSG00000028173/ENSMUSG00000028176/ENSMUSG00000038708/ENSMUSG00000036913/…	252
GO:0030324	lung development	144/7589	220/16212	0.654545	1.39827	5.57967	1.59186e-08	2.7433e-06	1.93118e-06	ENSMUSG00000021994/ENSMUSG00000035027/ENSMUSG00000026556/ENSMUSG00000022285/ENSMUSG00000022286/ENSMUSG00000022306/ENSMUSG00000032796/ENSMUSG00000026185/ENSMUSG00000034957/ENSMUSG00000020122/ENSMUSG00000061393/ENSMUSG00000039286/ENSMUSG00000027676/ENSMUSG00000028978/ENSMUSG00000002633/ENSMUSG00000030218/ENSMUSG00000017697/ENSMUSG00000030849/ENSMUSG00000064246/ENSMUSG00000016194/ENSMUSG00000010175/…	144
GO:0031330	negative regulation of cellular catabolic process	73/7589	98/16212	0.744898	1.59129	5.5078	2.1094e-08	3.53695e-06	2.48987e-06	ENSMUSG00000035242/ENSMUSG00000011305/ENSMUSG00000057722/ENSMUSG00000030317/ENSMUSG00000075590/ENSMUSG00000022607/ENSMUSG00000056121/ENSMUSG00000026463/ENSMUSG00000016529/ENSMUSG00000047443/ENSMUSG00000002845/ENSMUSG00000001729/ENSMUSG00000021944/ENSMUSG00000001630/ENSMUSG00000019850/ENSMUSG00000024101/ENSMUSG00000045962/ENSMUSG00000040010/ENSMUSG00000044288/ENSMUSG00000028278/ENSMUSG00000027843/…	73
GO:0045664	regulation of neuron differentiation	134/7589	203/16212	0.660099	1.41014	5.51647	2.28492e-08	3.73044e-06	2.62608e-06	ENSMUSG00000038119/ENSMUSG00000006498/ENSMUSG00000020167/ENSMUSG00000038146/ENSMUSG00000028519/ENSMUSG00000047407/ENSMUSG00000079415/ENSMUSG00000028351/ENSMUSG00000015053/ENSMUSG00000030098/ENSMUSG00000027699/ENSMUSG00000063887/ENSMUSG00000002633/ENSMUSG00000026341/ENSMUSG00000020647/ENSMUSG00000053024/ENSMUSG00000010175/ENSMUSG00000038084/ENSMUSG00000045648/ENSMUSG00000022508/ENSMUSG00000022812/…	134
GO:0051962	positive regulation of nervous system development	214/7589	349/16212	0.613181	1.30991	5.49059	2.6534e-08	4.22095e-06	2.97138e-06	ENSMUSG00000041444/ENSMUSG00000038119/ENSMUSG00000018411/ENSMUSG00000000125/ENSMUSG00000020932/ENSMUSG00000045776/ENSMUSG00000021994/ENSMUSG00000003068/ENSMUSG00000007594/ENSMUSG00000035027/ENSMUSG00000013033/ENSMUSG00000028173/ENSMUSG00000038708/ENSMUSG00000024735/ENSMUSG00000047787/ENSMUSG00000020122/ENSMUSG00000030093/ENSMUSG00000034312/ENSMUSG00000030084/ENSMUSG00000000440/ENSMUSG00000049112/…	214
GO:0043588	skin development	183/7589	292/16212	0.626712	1.33881	5.48087	2.81584e-08	4.36737e-06	3.07446e-06	ENSMUSG00000031995/ENSMUSG00000032033/ENSMUSG00000031849/ENSMUSG00000021994/ENSMUSG00000034854/ENSMUSG00000004934/ENSMUSG00000032187/ENSMUSG00000034926/ENSMUSG00000062627/ENSMUSG00000032508/ENSMUSG00000032512/ENSMUSG00000026556/ENSMUSG00000022286/ENSMUSG00000022297/ENSMUSG00000024922/ENSMUSG00000026185/ENSMUSG00000000247/ENSMUSG00000047250/ENSMUSG00000020122/ENSMUSG00000030093/ENSMUSG00000022996/…	183
GO:0048762	mesenchymal cell differentiation	153/7589	238/16212	0.642857	1.3733	5.44267	3.49747e-08	5.29227e-06	3.72555e-06	ENSMUSG00000021994/ENSMUSG00000001227/ENSMUSG00000040651/ENSMUSG00000026556/ENSMUSG00000031980/ENSMUSG00000026883/ENSMUSG00000031965/ENSMUSG00000029687/ENSMUSG00000002633/ENSMUSG00000022607/ENSMUSG00000026383/ENSMUSG00000024975/ENSMUSG00000024985/ENSMUSG00000030849/ENSMUSG00000026193/ENSMUSG00000039239/ENSMUSG00000030031/ENSMUSG00000022812/ENSMUSG00000068284/ENSMUSG00000045671/ENSMUSG00000020458/…	153
GO:0048639	positive regulation of developmental growth	130/7589	197/16212	0.659898	1.40971	5.42765	3.78871e-08	5.47525e-06	3.85436e-06	ENSMUSG00000041444/ENSMUSG00000018411/ENSMUSG00000000125/ENSMUSG00000021994/ENSMUSG00000028524/ENSMUSG00000038708/ENSMUSG00000031980/ENSMUSG00000022306/ENSMUSG00000030270/ENSMUSG00000031965/ENSMUSG00000051136/ENSMUSG00000035277/ENSMUSG00000022556/ENSMUSG00000045382/ENSMUSG00000024978/ENSMUSG00000030849/ENSMUSG00000026193/ENSMUSG00000010175/ENSMUSG00000022770/ENSMUSG00000022812/ENSMUSG00000000861/…	130
GO:0030323	respiratory tube development	144/7589	222/16212	0.648649	1.38568	5.42803	3.7949e-08	5.47525e-06	3.85436e-06	ENSMUSG00000021994/ENSMUSG00000035027/ENSMUSG00000026556/ENSMUSG00000022285/ENSMUSG00000022286/ENSMUSG00000022306/ENSMUSG00000032796/ENSMUSG00000026185/ENSMUSG00000034957/ENSMUSG00000020122/ENSMUSG00000061393/ENSMUSG00000039286/ENSMUSG00000027676/ENSMUSG00000028978/ENSMUSG00000002633/ENSMUSG00000030218/ENSMUSG00000017697/ENSMUSG00000030849/ENSMUSG00000064246/ENSMUSG00000016194/ENSMUSG00000010175/…	144
GO:1903131	mononuclear cell differentiation	287/7589	488/16212	0.588115	1.25636	5.39444	4.47306e-08	6.30701e-06	4.43988e-06	ENSMUSG00000031077/ENSMUSG00000031805/ENSMUSG00000020167/ENSMUSG00000020198/ENSMUSG00000003068/ENSMUSG00000057729/ENSMUSG00000024002/ENSMUSG00000035011/ENSMUSG00000035678/ENSMUSG00000034116/ENSMUSG00000001911/ENSMUSG00000032187/ENSMUSG00000032508/ENSMUSG00000057722/ENSMUSG00000053318/ENSMUSG00000024673/ENSMUSG00000034957/ENSMUSG00000056216/ENSMUSG00000015053/ENSMUSG00000000440/ENSMUSG00000022996/…	287
GO:0048732	gland development	290/7589	494/16212	0.587045	1.25407	5.38013	4.83841e-08	6.67056e-06	4.69581e-06	ENSMUSG00000064354/ENSMUSG00000018634/ENSMUSG00000000125/ENSMUSG00000031077/ENSMUSG00000031074/ENSMUSG00000021994/ENSMUSG00000063457/ENSMUSG00000003068/ENSMUSG00000035027/ENSMUSG00000032187/ENSMUSG00000044254/ENSMUSG00000040726/ENSMUSG00000028173/ENSMUSG00000062908/ENSMUSG00000032796/ENSMUSG00000024098/ENSMUSG00000024942/ENSMUSG00000026185/ENSMUSG00000024913/ENSMUSG00000024900/ENSMUSG00000034957/…	290
GO:0050767	regulation of neurogenesis	254/7589	426/16212	0.596244	1.27373	5.37098	5.13379e-08	6.92393e-06	4.87417e-06	ENSMUSG00000041444/ENSMUSG00000038119/ENSMUSG00000018411/ENSMUSG00000000125/ENSMUSG00000020932/ENSMUSG00000021994/ENSMUSG00000003068/ENSMUSG00000007594/ENSMUSG00000035027/ENSMUSG00000013236/ENSMUSG00000032193/ENSMUSG00000028519/ENSMUSG00000028556/ENSMUSG00000032513/ENSMUSG00000028173/ENSMUSG00000038708/ENSMUSG00000024735/ENSMUSG00000000247/ENSMUSG00000028351/ENSMUSG00000020122/ENSMUSG00000030093/…	254
GO:0051145	smooth muscle cell differentiation	58/7589	75/16212	0.773333	1.65203	5.30954	6.1239e-08	8.08355e-06	5.6905e-06	ENSMUSG00000031849/ENSMUSG00000061780/ENSMUSG00000032187/ENSMUSG00000028179/ENSMUSG00000026556/ENSMUSG00000031980/ENSMUSG00000044338/ENSMUSG00000028949/ENSMUSG00000002633/ENSMUSG00000024975/ENSMUSG00000030849/ENSMUSG00000026768/ENSMUSG00000006932/ENSMUSG00000031616/ENSMUSG00000051367/ENSMUSG00000005583/ENSMUSG00000024620/ENSMUSG00000049107/ENSMUSG00000042812/ENSMUSG00000032419/ENSMUSG00000006818/…	58
GO:0048592	eye morphogenesis	114/7589	170/16212	0.670588	1.43254	5.31855	6.94289e-08	8.79055e-06	6.18819e-06	ENSMUSG00000038119/ENSMUSG00000079415/ENSMUSG00000024913/ENSMUSG00000030324/ENSMUSG00000030323/ENSMUSG00000037643/ENSMUSG00000030116/ENSMUSG00000022568/ENSMUSG00000038564/ENSMUSG00000010175/ENSMUSG00000030022/ENSMUSG00000022656/ENSMUSG00000020160/ENSMUSG00000020467/ENSMUSG00000035270/ENSMUSG00000006932/ENSMUSG00000068196/ENSMUSG00000021848/ENSMUSG00000021109/ENSMUSG00000039910/ENSMUSG00000015134/…	114
GO:0048754	branching morphogenesis of an epithelial tube	114/7589	170/16212	0.670588	1.43254	5.31855	6.94289e-08	8.79055e-06	6.18819e-06	ENSMUSG00000018486/ENSMUSG00000021994/ENSMUSG00000026556/ENSMUSG00000031980/ENSMUSG00000032796/ENSMUSG00000024913/ENSMUSG00000031965/ENSMUSG00000002633/ENSMUSG00000030218/ENSMUSG00000045382/ENSMUSG00000018209/ENSMUSG00000030849/ENSMUSG00000022770/ENSMUSG00000051980/ENSMUSG00000006932/ENSMUSG00000031616/ENSMUSG00000064325/ENSMUSG00000051367/ENSMUSG00000034460/ENSMUSG00000027358/ENSMUSG00000045680/…	114
GO:0003018	vascular process in circulatory system	147/7589	229/16212	0.641921	1.3713	5.30868	7.38902e-08	9.1683e-06	6.45412e-06	ENSMUSG00000031849/ENSMUSG00000034845/ENSMUSG00000034881/ENSMUSG00000034917/ENSMUSG00000007097/ENSMUSG00000031980/ENSMUSG00000110195/ENSMUSG00000027077/ENSMUSG00000024942/ENSMUSG00000047250/ENSMUSG00000020122/ENSMUSG00000033174/ENSMUSG00000030098/ENSMUSG00000053004/ENSMUSG00000049112/ENSMUSG00000028978/ENSMUSG00000045534/ENSMUSG00000022565/ENSMUSG00000059895/ENSMUSG00000022607/ENSMUSG00000038676/…	147
GO:0045766	positive regulation of angiogenesis	103/7589	151/16212	0.682119	1.45718	5.29486	7.85783e-08	9.46459e-06	6.6627e-06	ENSMUSG00000032035/ENSMUSG00000020689/ENSMUSG00000034708/ENSMUSG00000021994/ENSMUSG00000034881/ENSMUSG00000019579/ENSMUSG00000028553/ENSMUSG00000028530/ENSMUSG00000024053/ENSMUSG00000044338/ENSMUSG00000037966/ENSMUSG00000031963/ENSMUSG00000015053/ENSMUSG00000051136/ENSMUSG00000028978/ENSMUSG00000002633/ENSMUSG00000040552/ENSMUSG00000045382/ENSMUSG00000059456/ENSMUSG00000064246/ENSMUSG00000016529/…	103
GO:0035148	tube formation	111/7589	165/16212	0.672727	1.43711	5.29428	7.93293e-08	9.46459e-06	6.6627e-06	ENSMUSG00000031995/ENSMUSG00000018486/ENSMUSG00000031074/ENSMUSG00000021994/ENSMUSG00000036180/ENSMUSG00000040726/ENSMUSG00000026556/ENSMUSG00000022285/ENSMUSG00000022286/ENSMUSG00000022297/ENSMUSG00000047407/ENSMUSG00000054611/ENSMUSG00000000247/ENSMUSG00000026883/ENSMUSG00000030323/ENSMUSG00000002633/ENSMUSG00000022568/ENSMUSG00000038564/ENSMUSG00000017009/ENSMUSG00000018209/ENSMUSG00000030849/…	111
GO:0061448	connective tissue development	183/7589	295/16212	0.620339	1.3252	5.28808	8.2342e-08	9.63868e-06	6.78525e-06	ENSMUSG00000032033/ENSMUSG00000020689/ENSMUSG00000050917/ENSMUSG00000031849/ENSMUSG00000021994/ENSMUSG00000035011/ENSMUSG00000032185/ENSMUSG00000022330/ENSMUSG00000024098/ENSMUSG00000024913/ENSMUSG00000030093/ENSMUSG00000000440/ENSMUSG00000027630/ENSMUSG00000022996/ENSMUSG00000002221/ENSMUSG00000030218/ENSMUSG00000040552/ENSMUSG00000020647/ENSMUSG00000010311/ENSMUSG00000016494/ENSMUSG00000039239/…	183
GO:0010506	regulation of autophagy	171/7589	273/16212	0.626374	1.33809	5.28508	8.3899e-08	9.63906e-06	6.78551e-06	ENSMUSG00000018411/ENSMUSG00000020932/ENSMUSG00000031078/ENSMUSG00000019428/ENSMUSG00000003068/ENSMUSG00000047123/ENSMUSG00000028618/ENSMUSG00000028518/ENSMUSG00000057722/ENSMUSG00000023460/ENSMUSG00000052105/ENSMUSG00000024958/ENSMUSG00000038765/ENSMUSG00000028007/ENSMUSG00000030314/ENSMUSG00000056900/ENSMUSG00000041247/ENSMUSG00000063704/ENSMUSG00000075590/ENSMUSG00000022607/ENSMUSG00000004451/…	171
GO:0048638	regulation of developmental growth	212/7589	349/16212	0.60745	1.29766	5.2737	8.84336e-08	9.97531e-06	7.02222e-06	ENSMUSG00000041444/ENSMUSG00000018411/ENSMUSG00000000125/ENSMUSG00000034708/ENSMUSG00000031078/ENSMUSG00000021994/ENSMUSG00000020150/ENSMUSG00000013236/ENSMUSG00000033335/ENSMUSG00000028524/ENSMUSG00000036792/ENSMUSG00000038708/ENSMUSG00000031980/ENSMUSG00000022306/ENSMUSG00000033174/ENSMUSG00000030315/ENSMUSG00000030270/ENSMUSG00000031965/ENSMUSG00000051136/ENSMUSG00000035277/ENSMUSG00000022556/…	212
GO:0045765	regulation of angiogenesis	170/7589	272/16212	0.625	1.33516	5.22944	1.13588e-07	1.23631e-05	8.70313e-06	ENSMUSG00000032035/ENSMUSG00000020689/ENSMUSG00000034708/ENSMUSG00000021994/ENSMUSG00000034881/ENSMUSG00000019579/ENSMUSG00000028553/ENSMUSG00000028530/ENSMUSG00000031980/ENSMUSG00000024053/ENSMUSG00000044338/ENSMUSG00000026883/ENSMUSG00000037966/ENSMUSG00000031963/ENSMUSG00000015053/ENSMUSG00000000440/ENSMUSG00000051136/ENSMUSG00000028978/ENSMUSG00000002633/ENSMUSG00000040552/ENSMUSG00000003154/…	170
GO:0060070	canonical Wnt signaling pathway	170/7589	272/16212	0.625	1.33516	5.22944	1.13588e-07	1.23631e-05	8.70313e-06	ENSMUSG00000000125/ENSMUSG00000018486/ENSMUSG00000050288/ENSMUSG00000021994/ENSMUSG00000003345/ENSMUSG00000020135/ENSMUSG00000003068/ENSMUSG00000040726/ENSMUSG00000028173/ENSMUSG00000050447/ENSMUSG00000037487/ENSMUSG00000022297/ENSMUSG00000024816/ENSMUSG00000024913/ENSMUSG00000026883/ENSMUSG00000020122/ENSMUSG00000037989/ENSMUSG00000030093/ENSMUSG00000030079/ENSMUSG00000027630/ENSMUSG00000022996/…	170
GO:0097485	neuron projection guidance	144/7589	225/16212	0.64	1.3672	5.20329	1.31409e-07	1.40563e-05	9.89505e-06	ENSMUSG00000032128/ENSMUSG00000000125/ENSMUSG00000045776/ENSMUSG00000021994/ENSMUSG00000003070/ENSMUSG00000038146/ENSMUSG00000001227/ENSMUSG00000026764/ENSMUSG00000026556/ENSMUSG00000032796/ENSMUSG00000000247/ENSMUSG00000039270/ENSMUSG00000030084/ENSMUSG00000002633/ENSMUSG00000035277/ENSMUSG00000045382/ENSMUSG00000025085/ENSMUSG00000026442/ENSMUSG00000053024/ENSMUSG00000026639/ENSMUSG00000039239/…	144
GO:0034329	cell junction assembly	289/7589	496/16212	0.582661	1.24471	5.19266	1.34025e-07	1.40931e-05	9.92095e-06	ENSMUSG00000055322/ENSMUSG00000032036/ENSMUSG00000001946/ENSMUSG00000020689/ENSMUSG00000018411/ENSMUSG00000034520/ENSMUSG00000037541/ENSMUSG00000031078/ENSMUSG00000045776/ENSMUSG00000021994/ENSMUSG00000007594/ENSMUSG00000013236/ENSMUSG00000013033/ENSMUSG00000034656/ENSMUSG00000061859/ENSMUSG00000028556/ENSMUSG00000031985/ENSMUSG00000031980/ENSMUSG00000022286/ENSMUSG00000044338/ENSMUSG00000047787/…	289
GO:0048593	camera-type eye morphogenesis	96/7589	140/16212	0.685714	1.46486	5.18223	1.45452e-07	1.50397e-05	1.05874e-05	ENSMUSG00000038119/ENSMUSG00000079415/ENSMUSG00000024913/ENSMUSG00000030324/ENSMUSG00000030323/ENSMUSG00000022568/ENSMUSG00000038564/ENSMUSG00000010175/ENSMUSG00000030022/ENSMUSG00000022656/ENSMUSG00000020160/ENSMUSG00000035270/ENSMUSG00000006932/ENSMUSG00000068196/ENSMUSG00000021109/ENSMUSG00000039910/ENSMUSG00000015134/ENSMUSG00000030201/ENSMUSG00000029475/ENSMUSG00000021239/ENSMUSG00000008999/…	96
GO:0001667	ameboidal-type cell migration	157/7589	249/16212	0.630522	1.34695	5.17584	1.52047e-07	1.54639e-05	1.0886e-05	ENSMUSG00000055322/ENSMUSG00000020689/ENSMUSG00000079019/ENSMUSG00000021994/ENSMUSG00000032714/ENSMUSG00000001227/ENSMUSG00000004508/ENSMUSG00000024913/ENSMUSG00000026883/ENSMUSG00000034312/ENSMUSG00000039286/ENSMUSG00000040760/ENSMUSG00000027805/ENSMUSG00000002633/ENSMUSG00000022568/ENSMUSG00000022565/ENSMUSG00000022607/ENSMUSG00000026383/ENSMUSG00000026341/ENSMUSG00000045382/ENSMUSG00000034330/…	157
GO:0090100	positive regulation of transmembrane receptor protein serine/threonine kinase signaling pathway	70/7589	96/16212	0.729167	1.55768	5.14117	1.73171e-07	1.73283e-05	1.21984e-05	ENSMUSG00000019428/ENSMUSG00000003068/ENSMUSG00000024098/ENSMUSG00000061393/ENSMUSG00000031963/ENSMUSG00000000440/ENSMUSG00000031965/ENSMUSG00000027661/ENSMUSG00000039239/ENSMUSG00000026768/ENSMUSG00000027358/ENSMUSG00000027356/ENSMUSG00000021944/ENSMUSG00000039910/ENSMUSG00000026496/ENSMUSG00000008999/ENSMUSG00000032633/ENSMUSG00000025190/ENSMUSG00000032179/ENSMUSG00000056004/ENSMUSG00000061436/…	70
GO:0007411	axon guidance	143/7589	224/16212	0.638393	1.36377	5.14301	1.81721e-07	1.78952e-05	1.25975e-05	ENSMUSG00000032128/ENSMUSG00000000125/ENSMUSG00000045776/ENSMUSG00000021994/ENSMUSG00000003070/ENSMUSG00000038146/ENSMUSG00000001227/ENSMUSG00000026764/ENSMUSG00000026556/ENSMUSG00000032796/ENSMUSG00000000247/ENSMUSG00000039270/ENSMUSG00000002633/ENSMUSG00000035277/ENSMUSG00000045382/ENSMUSG00000025085/ENSMUSG00000026442/ENSMUSG00000053024/ENSMUSG00000026639/ENSMUSG00000039239/ENSMUSG00000047261/…	143
GO:0007416	synapse assembly	168/7589	270/16212	0.622222	1.32922	5.11761	2.06847e-07	2.00512e-05	1.41153e-05	ENSMUSG00000032036/ENSMUSG00000018411/ENSMUSG00000037541/ENSMUSG00000045776/ENSMUSG00000021994/ENSMUSG00000007594/ENSMUSG00000013236/ENSMUSG00000013033/ENSMUSG00000034656/ENSMUSG00000028556/ENSMUSG00000031985/ENSMUSG00000047787/ENSMUSG00000045903/ENSMUSG00000030093/ENSMUSG00000034312/ENSMUSG00000030084/ENSMUSG00000034269/ENSMUSG00000030257/ENSMUSG00000049112/ENSMUSG00000051136/ENSMUSG00000063887/…	168
GO:0003205	cardiac chamber development	120/7589	183/16212	0.655738	1.40082	5.11551	2.10778e-07	2.01179e-05	1.41622e-05	ENSMUSG00000050288/ENSMUSG00000021994/ENSMUSG00000006235/ENSMUSG00000032187/ENSMUSG00000033335/ENSMUSG00000026556/ENSMUSG00000022286/ENSMUSG00000022306/ENSMUSG00000049672/ENSMUSG00000110195/ENSMUSG00000044338/ENSMUSG00000057110/ENSMUSG00000031965/ENSMUSG00000028978/ENSMUSG00000028949/ENSMUSG00000033837/ENSMUSG00000045382/ENSMUSG00000029146/ENSMUSG00000030849/ENSMUSG00000010175/ENSMUSG00000037624/…	120
GO:1904018	positive regulation of vasculature development	103/7589	153/16212	0.673203	1.43813	5.10807	2.18477e-07	2.05368e-05	1.44571e-05	ENSMUSG00000032035/ENSMUSG00000020689/ENSMUSG00000034708/ENSMUSG00000021994/ENSMUSG00000034881/ENSMUSG00000019579/ENSMUSG00000028553/ENSMUSG00000028530/ENSMUSG00000024053/ENSMUSG00000044338/ENSMUSG00000037966/ENSMUSG00000031963/ENSMUSG00000015053/ENSMUSG00000051136/ENSMUSG00000028978/ENSMUSG00000002633/ENSMUSG00000040552/ENSMUSG00000045382/ENSMUSG00000059456/ENSMUSG00000064246/ENSMUSG00000016529/…	103
GO:1903706	regulation of hemopoiesis	229/7589	384/16212	0.596354	1.27396	5.09695	2.26377e-07	2.09619e-05	1.47563e-05	ENSMUSG00000032035/ENSMUSG00000020689/ENSMUSG00000031077/ENSMUSG00000020325/ENSMUSG00000031805/ENSMUSG00000020198/ENSMUSG00000024002/ENSMUSG00000035011/ENSMUSG00000035678/ENSMUSG00000032187/ENSMUSG00000062627/ENSMUSG00000053318/ENSMUSG00000037465/ENSMUSG00000024958/ENSMUSG00000034957/ENSMUSG00000037966/ENSMUSG00000015053/ENSMUSG00000030314/ENSMUSG00000022996/ENSMUSG00000027671/ENSMUSG00000050075/…	229
GO:0050803	regulation of synapse structure or activity	213/7589	354/16212	0.601695	1.28537	5.09278	2.32561e-07	2.12178e-05	1.49365e-05	ENSMUSG00000045532/ENSMUSG00000037541/ENSMUSG00000045776/ENSMUSG00000020327/ENSMUSG00000021994/ENSMUSG00000013236/ENSMUSG00000013033/ENSMUSG00000028519/ENSMUSG00000037995/ENSMUSG00000026556/ENSMUSG00000022285/ENSMUSG00000024969/ENSMUSG00000047787/ENSMUSG00000026883/ENSMUSG00000044667/ENSMUSG00000030093/ENSMUSG00000034312/ENSMUSG00000034269/ENSMUSG00000030257/ENSMUSG00000049112/ENSMUSG00000051136/…	213
GO:1901342	regulation of vasculature development	172/7589	278/16212	0.618705	1.32171	5.07564	2.57817e-07	2.31811e-05	1.63186e-05	ENSMUSG00000032035/ENSMUSG00000020689/ENSMUSG00000034708/ENSMUSG00000021994/ENSMUSG00000034881/ENSMUSG00000019579/ENSMUSG00000028553/ENSMUSG00000028530/ENSMUSG00000031980/ENSMUSG00000024053/ENSMUSG00000044338/ENSMUSG00000026883/ENSMUSG00000037966/ENSMUSG00000031963/ENSMUSG00000015053/ENSMUSG00000000440/ENSMUSG00000051136/ENSMUSG00000028978/ENSMUSG00000002633/ENSMUSG00000040552/ENSMUSG00000003154/…	172
GO:0050807	regulation of synapse organization	209/7589	347/16212	0.602305	1.28667	5.0641	2.70619e-07	2.39846e-05	1.68842e-05	ENSMUSG00000045532/ENSMUSG00000037541/ENSMUSG00000045776/ENSMUSG00000020327/ENSMUSG00000021994/ENSMUSG00000013236/ENSMUSG00000013033/ENSMUSG00000028519/ENSMUSG00000037995/ENSMUSG00000026556/ENSMUSG00000022285/ENSMUSG00000024969/ENSMUSG00000047787/ENSMUSG00000026883/ENSMUSG00000044667/ENSMUSG00000030093/ENSMUSG00000034312/ENSMUSG00000034269/ENSMUSG00000030257/ENSMUSG00000049112/ENSMUSG00000051136/…	209
GO:0016049	cell growth	283/7589	488/16212	0.579918	1.23885	5.02599	3.22459e-07	2.81766e-05	1.98352e-05	ENSMUSG00000041444/ENSMUSG00000018411/ENSMUSG00000000125/ENSMUSG00000031078/ENSMUSG00000021994/ENSMUSG00000045193/ENSMUSG00000003068/ENSMUSG00000002833/ENSMUSG00000013236/ENSMUSG00000001911/ENSMUSG00000032187/ENSMUSG00000033335/ENSMUSG00000028179/ENSMUSG00000038708/ENSMUSG00000031980/ENSMUSG00000022300/ENSMUSG00000079415/ENSMUSG00000047787/ENSMUSG00000026185/ENSMUSG00000038696/ENSMUSG00000000247/…	283
GO:0072175	epithelial tube formation	103/7589	154/16212	0.668831	1.42879	5.01566	3.57109e-07	3.07709e-05	2.16615e-05	ENSMUSG00000031995/ENSMUSG00000018486/ENSMUSG00000031074/ENSMUSG00000021994/ENSMUSG00000036180/ENSMUSG00000040726/ENSMUSG00000026556/ENSMUSG00000022286/ENSMUSG00000022297/ENSMUSG00000047407/ENSMUSG00000054611/ENSMUSG00000000247/ENSMUSG00000030323/ENSMUSG00000002633/ENSMUSG00000022568/ENSMUSG00000038564/ENSMUSG00000017009/ENSMUSG00000018209/ENSMUSG00000030849/ENSMUSG00000039239/ENSMUSG00000038084/…	103
GO:0001764	neuron migration	126/7589	195/16212	0.646154	1.38035	5.01272	3.62711e-07	3.08254e-05	2.16999e-05	ENSMUSG00000041444/ENSMUSG00000032036/ENSMUSG00000032128/ENSMUSG00000018411/ENSMUSG00000028519/ENSMUSG00000022305/ENSMUSG00000024969/ENSMUSG00000038765/ENSMUSG00000026890/ENSMUSG00000026883/ENSMUSG00000015053/ENSMUSG00000030084/ENSMUSG00000031965/ENSMUSG00000036334/ENSMUSG00000035277/ENSMUSG00000022607/ENSMUSG00000045382/ENSMUSG00000057897/ENSMUSG00000043969/ENSMUSG00000053024/ENSMUSG00000022812/…	126
GO:0048844	artery morphogenesis	59/7589	79/16212	0.746835	1.59543	4.97683	4.08061e-07	3.38307e-05	2.38155e-05	ENSMUSG00000031849/ENSMUSG00000038146/ENSMUSG00000032193/ENSMUSG00000032187/ENSMUSG00000028553/ENSMUSG00000033837/ENSMUSG00000010175/ENSMUSG00000030022/ENSMUSG00000039239/ENSMUSG00000020458/ENSMUSG00000006932/ENSMUSG00000031616/ENSMUSG00000051367/ENSMUSG00000039910/ENSMUSG00000024620/ENSMUSG00000042812/ENSMUSG00000025810/ENSMUSG00000025927/ENSMUSG00000023918/ENSMUSG00000056492/ENSMUSG00000023951/…	59
GO:0048565	digestive tract development	92/7589	135/16212	0.681481	1.45581	4.98908	4.08979e-07	3.38307e-05	2.38155e-05	ENSMUSG00000009545/ENSMUSG00000021994/ENSMUSG00000026556/ENSMUSG00000020122/ENSMUSG00000061393/ENSMUSG00000049112/ENSMUSG00000027676/ENSMUSG00000009281/ENSMUSG00000002633/ENSMUSG00000026383/ENSMUSG00000038564/ENSMUSG00000017697/ENSMUSG00000024985/ENSMUSG00000030849/ENSMUSG00000039239/ENSMUSG00000022510/ENSMUSG00000006932/ENSMUSG00000044548/ENSMUSG00000021109/ENSMUSG00000021944/ENSMUSG00000019982/…	92
GO:0008544	epidermis development	205/7589	341/16212	0.601173	1.28426	4.97682	4.25995e-07	3.47746e-05	2.448e-05	ENSMUSG00000031995/ENSMUSG00000032033/ENSMUSG00000009545/ENSMUSG00000021994/ENSMUSG00000034854/ENSMUSG00000004934/ENSMUSG00000054708/ENSMUSG00000032187/ENSMUSG00000062627/ENSMUSG00000026556/ENSMUSG00000022286/ENSMUSG00000022297/ENSMUSG00000024922/ENSMUSG00000026185/ENSMUSG00000000247/ENSMUSG00000047250/ENSMUSG00000020122/ENSMUSG00000030302/ENSMUSG00000022996/ENSMUSG00000043850/ENSMUSG00000029687/…	205
GO:0048839	inner ear development	139/7589	219/16212	0.634703	1.35588	4.97433	4.41497e-07	3.5572e-05	2.50413e-05	ENSMUSG00000050288/ENSMUSG00000009545/ENSMUSG00000031074/ENSMUSG00000021994/ENSMUSG00000054708/ENSMUSG00000040726/ENSMUSG00000035305/ENSMUSG00000026556/ENSMUSG00000022297/ENSMUSG00000034957/ENSMUSG00000044667/ENSMUSG00000031963/ENSMUSG00000015053/ENSMUSG00000002870/ENSMUSG00000030302/ENSMUSG00000043850/ENSMUSG00000045294/ENSMUSG00000002633/ENSMUSG00000022568/ENSMUSG00000049265/ENSMUSG00000017009/…	139
GO:0042391	regulation of membrane potential	264/7589	453/16212	0.582781	1.24497	4.96089	4.53251e-07	3.60509e-05	2.53784e-05	ENSMUSG00000032034/ENSMUSG00000018411/ENSMUSG00000009545/ENSMUSG00000031075/ENSMUSG00000020331/ENSMUSG00000034781/ENSMUSG00000034792/ENSMUSG00000003575/ENSMUSG00000005357/ENSMUSG00000034656/ENSMUSG00000034115/ENSMUSG00000034533/ENSMUSG00000044708/ENSMUSG00000038026/ENSMUSG00000007097/ENSMUSG00000031980/ENSMUSG00000027071/ENSMUSG00000079415/ENSMUSG00000045903/ENSMUSG00000068696/ENSMUSG00000030093/…	264
GO:0021537	telencephalon development	171/7589	278/16212	0.615108	1.31402	4.9544	4.8391e-07	3.80023e-05	2.67521e-05	ENSMUSG00000032036/ENSMUSG00000038119/ENSMUSG00000021994/ENSMUSG00000003070/ENSMUSG00000001227/ENSMUSG00000013236/ENSMUSG00000001911/ENSMUSG00000028519/ENSMUSG00000007097/ENSMUSG00000037984/ENSMUSG00000050896/ENSMUSG00000000247/ENSMUSG00000026890/ENSMUSG00000026883/ENSMUSG00000018189/ENSMUSG00000020122/ENSMUSG00000030314/ENSMUSG00000049112/ENSMUSG00000027680/ENSMUSG00000036353/ENSMUSG00000029687/…	171
GO:0007369	gastrulation	120/7589	185/16212	0.648649	1.38568	4.94937	5.0456e-07	3.91286e-05	2.7545e-05	ENSMUSG00000020689/ENSMUSG00000000125/ENSMUSG00000020167/ENSMUSG00000021994/ENSMUSG00000066839/ENSMUSG00000040651/ENSMUSG00000028517/ENSMUSG00000028173/ENSMUSG00000026556/ENSMUSG00000022330/ENSMUSG00000047407/ENSMUSG00000024098/ENSMUSG00000044338/ENSMUSG00000024913/ENSMUSG00000036427/ENSMUSG00000028821/ENSMUSG00000061393/ENSMUSG00000012396/ENSMUSG00000026383/ENSMUSG00000017950/ENSMUSG00000034765/…	120
GO:0048545	response to steroid hormone	194/7589	321/16212	0.604361	1.29107	4.94126	5.13171e-07	3.93051e-05	2.76692e-05	ENSMUSG00000035011/ENSMUSG00000042625/ENSMUSG00000032187/ENSMUSG00000032185/ENSMUSG00000007097/ENSMUSG00000031972/ENSMUSG00000037487/ENSMUSG00000024912/ENSMUSG00000045903/ENSMUSG00000036427/ENSMUSG00000033400/ENSMUSG00000020122/ENSMUSG00000039323/ENSMUSG00000049112/ENSMUSG00000051136/ENSMUSG00000030226/ENSMUSG00000030111/ENSMUSG00000021750/ENSMUSG00000033837/ENSMUSG00000026986/ENSMUSG00000024063/…	194
GO:0141091	transforming growth factor beta receptor superfamily signaling pathway	189/7589	312/16212	0.605769	1.29407	4.92044	5.71692e-07	4.32534e-05	3.04486e-05	ENSMUSG00000020325/ENSMUSG00000019428/ENSMUSG00000031849/ENSMUSG00000021994/ENSMUSG00000003068/ENSMUSG00000035011/ENSMUSG00000066839/ENSMUSG00000033335/ENSMUSG00000039219/ENSMUSG00000047407/ENSMUSG00000024098/ENSMUSG00000032812/ENSMUSG00000026864/ENSMUSG00000061393/ENSMUSG00000031963/ENSMUSG00000000440/ENSMUSG00000031965/ENSMUSG00000027660/ENSMUSG00000040760/ENSMUSG00000012396/ENSMUSG00000033837/…	189
GO:0031032	actomyosin structure organization	132/7589	207/16212	0.637681	1.36225	4.92073	5.82902e-07	4.35701e-05	3.06716e-05	ENSMUSG00000037519/ENSMUSG00000004665/ENSMUSG00000033335/ENSMUSG00000035407/ENSMUSG00000007122/ENSMUSG00000031972/ENSMUSG00000024049/ENSMUSG00000024043/ENSMUSG00000032812/ENSMUSG00000027699/ENSMUSG00000027805/ENSMUSG00000033542/ENSMUSG00000022565/ENSMUSG00000022580/ENSMUSG00000026383/ENSMUSG00000059456/ENSMUSG00000067653/ENSMUSG00000017009/ENSMUSG00000049134/ENSMUSG00000042451/ENSMUSG00000010175/…	132
GO:0030307	positive regulation of cell growth	117/7589	180/16212	0.65	1.38856	4.9178	5.93941e-07	4.38668e-05	3.08805e-05	ENSMUSG00000041444/ENSMUSG00000018411/ENSMUSG00000000125/ENSMUSG00000021994/ENSMUSG00000002833/ENSMUSG00000038708/ENSMUSG00000079415/ENSMUSG00000038696/ENSMUSG00000020122/ENSMUSG00000030270/ENSMUSG00000031278/ENSMUSG00000034259/ENSMUSG00000022607/ENSMUSG00000045382/ENSMUSG00000038676/ENSMUSG00000059456/ENSMUSG00000026193/ENSMUSG00000039239/ENSMUSG00000022812/ENSMUSG00000000861/ENSMUSG00000001729/…	117
GO:0003206	cardiac chamber morphogenesis	91/7589	134/16212	0.679104	1.45074	4.91504	6.01803e-07	4.39245e-05	3.09211e-05	ENSMUSG00000050288/ENSMUSG00000006235/ENSMUSG00000032187/ENSMUSG00000026556/ENSMUSG00000022286/ENSMUSG00000022306/ENSMUSG00000044338/ENSMUSG00000031965/ENSMUSG00000028978/ENSMUSG00000028949/ENSMUSG00000033837/ENSMUSG00000030849/ENSMUSG00000010175/ENSMUSG00000039239/ENSMUSG00000044674/ENSMUSG00000006932/ENSMUSG00000031616/ENSMUSG00000021109/ENSMUSG00000027966/ENSMUSG00000027358/ENSMUSG00000021944/…	91
GO:0060348	bone development	139/7589	220/16212	0.631818	1.34972	4.89948	6.48197e-07	4.67606e-05	3.29176e-05	ENSMUSG00000025489/ENSMUSG00000050917/ENSMUSG00000031849/ENSMUSG00000001911/ENSMUSG00000032185/ENSMUSG00000057722/ENSMUSG00000022330/ENSMUSG00000024913/ENSMUSG00000037966/ENSMUSG00000045294/ENSMUSG00000038564/ENSMUSG00000030849/ENSMUSG00000010311/ENSMUSG00000029122/ENSMUSG00000028086/ENSMUSG00000031684/ENSMUSG00000031681/ENSMUSG00000042734/ENSMUSG00000027358/ENSMUSG00000005583/ENSMUSG00000039910/…	139
GO:0001838	embryonic epithelial tube formation	96/7589	143/16212	0.671329	1.43413	4.89167	6.79913e-07	4.84848e-05	3.41314e-05	ENSMUSG00000031995/ENSMUSG00000018486/ENSMUSG00000021994/ENSMUSG00000036180/ENSMUSG00000026556/ENSMUSG00000022286/ENSMUSG00000022297/ENSMUSG00000047407/ENSMUSG00000054611/ENSMUSG00000000247/ENSMUSG00000030323/ENSMUSG00000002633/ENSMUSG00000022568/ENSMUSG00000038564/ENSMUSG00000017009/ENSMUSG00000018209/ENSMUSG00000039239/ENSMUSG00000038084/ENSMUSG00000036949/ENSMUSG00000006932/ENSMUSG00000051367/…	96
GO:0010595	positive regulation of endothelial cell migration	71/7589	100/16212	0.71	1.51674	4.86254	7.76421e-07	5.46374e-05	3.84625e-05	ENSMUSG00000032035/ENSMUSG00000020689/ENSMUSG00000034708/ENSMUSG00000023175/ENSMUSG00000021994/ENSMUSG00000028517/ENSMUSG00000031980/ENSMUSG00000036427/ENSMUSG00000030093/ENSMUSG00000015053/ENSMUSG00000028978/ENSMUSG00000002633/ENSMUSG00000022570/ENSMUSG00000059456/ENSMUSG00000010175/ENSMUSG00000031714/ENSMUSG00000001729/ENSMUSG00000021109/ENSMUSG00000015619/ENSMUSG00000036585/ENSMUSG00000029470/…	71
GO:0009611	response to wounding	279/7589	484/16212	0.576446	1.23143	4.84931	7.93247e-07	5.46374e-05	3.84625e-05	ENSMUSG00000032038/ENSMUSG00000020689/ENSMUSG00000034708/ENSMUSG00000079019/ENSMUSG00000031849/ENSMUSG00000021994/ENSMUSG00000004665/ENSMUSG00000050147/ENSMUSG00000034881/ENSMUSG00000034902/ENSMUSG00000035027/ENSMUSG00000013236/ENSMUSG00000001911/ENSMUSG00000028517/ENSMUSG00000026556/ENSMUSG00000019726/ENSMUSG00000022297/ENSMUSG00000024053/ENSMUSG00000050896/ENSMUSG00000023224/ENSMUSG00000079415/…	279
GO:0032535	regulation of cellular component size	215/7589	362/16212	0.593923	1.26877	4.85159	8.01418e-07	5.46374e-05	3.84625e-05	ENSMUSG00000041444/ENSMUSG00000001946/ENSMUSG00000018411/ENSMUSG00000000125/ENSMUSG00000031078/ENSMUSG00000055553/ENSMUSG00000021994/ENSMUSG00000013236/ENSMUSG00000034116/ENSMUSG00000033335/ENSMUSG00000035407/ENSMUSG00000041734/ENSMUSG00000038708/ENSMUSG00000024043/ENSMUSG00000030691/ENSMUSG00000042797/ENSMUSG00000025439/ENSMUSG00000024942/ENSMUSG00000026879/ENSMUSG00000030093/ENSMUSG00000033174/…	215
GO:0032970	regulation of actin filament-based process	215/7589	362/16212	0.593923	1.26877	4.85159	8.01418e-07	5.46374e-05	3.84625e-05	ENSMUSG00000001946/ENSMUSG00000020689/ENSMUSG00000031078/ENSMUSG00000037519/ENSMUSG00000004665/ENSMUSG00000035407/ENSMUSG00000041734/ENSMUSG00000007097/ENSMUSG00000026556/ENSMUSG00000024043/ENSMUSG00000030691/ENSMUSG00000032812/ENSMUSG00000024942/ENSMUSG00000026879/ENSMUSG00000027699/ENSMUSG00000027805/ENSMUSG00000033542/ENSMUSG00000022378/ENSMUSG00000015766/ENSMUSG00000021750/ENSMUSG00000022580/…	215
GO:0035150	regulation of tube size	111/7589	170/16212	0.652941	1.39485	4.85501	8.1935e-07	5.46836e-05	3.84951e-05	ENSMUSG00000018486/ENSMUSG00000031849/ENSMUSG00000034881/ENSMUSG00000007097/ENSMUSG00000031980/ENSMUSG00000027077/ENSMUSG00000047250/ENSMUSG00000020122/ENSMUSG00000033174/ENSMUSG00000030098/ENSMUSG00000053004/ENSMUSG00000049112/ENSMUSG00000028978/ENSMUSG00000045534/ENSMUSG00000022607/ENSMUSG00000038676/ENSMUSG00000049511/ENSMUSG00000025026/ENSMUSG00000034765/ENSMUSG00000033717/ENSMUSG00000042429/…	111
GO:0030098	lymphocyte differentiation	235/7589	400/16212	0.5875	1.25505	4.84534	8.20885e-07	5.46836e-05	3.84951e-05	ENSMUSG00000031077/ENSMUSG00000031805/ENSMUSG00000020167/ENSMUSG00000020198/ENSMUSG00000003068/ENSMUSG00000024002/ENSMUSG00000035011/ENSMUSG00000035678/ENSMUSG00000034116/ENSMUSG00000032187/ENSMUSG00000057722/ENSMUSG00000053318/ENSMUSG00000024673/ENSMUSG00000056216/ENSMUSG00000022996/ENSMUSG00000027671/ENSMUSG00000029687/ENSMUSG00000028949/ENSMUSG00000002633/ENSMUSG00000034330/ENSMUSG00000059456/…	235
GO:0009612	response to mechanical stimulus	137/7589	217/16212	0.631336	1.34869	4.85119	8.2854e-07	5.46836e-05	3.84951e-05	ENSMUSG00000020689/ENSMUSG00000020941/ENSMUSG00000009545/ENSMUSG00000031077/ENSMUSG00000004665/ENSMUSG00000005824/ENSMUSG00000032508/ENSMUSG00000034115/ENSMUSG00000034533/ENSMUSG00000007097/ENSMUSG00000031972/ENSMUSG00000110195/ENSMUSG00000027071/ENSMUSG00000024912/ENSMUSG00000036427/ENSMUSG00000026915/ENSMUSG00000026879/ENSMUSG00000020122/ENSMUSG00000039323/ENSMUSG00000030094/ENSMUSG00000000441/…	137
GO:0003151	outflow tract morphogenesis	59/7589	80/16212	0.7375	1.57548	4.84063	8.4553e-07	5.52175e-05	3.8871e-05	ENSMUSG00000050288/ENSMUSG00000032187/ENSMUSG00000026556/ENSMUSG00000022306/ENSMUSG00000031965/ENSMUSG00000033837/ENSMUSG00000030849/ENSMUSG00000039239/ENSMUSG00000044674/ENSMUSG00000006932/ENSMUSG00000031616/ENSMUSG00000051367/ENSMUSG00000021109/ENSMUSG00000021944/ENSMUSG00000005583/ENSMUSG00000039910/ENSMUSG00000030201/ENSMUSG00000008999/ENSMUSG00000025810/ENSMUSG00000018604/ENSMUSG00000025969/…	59
GO:0042310	vasoconstriction	75/7589	107/16212	0.700935	1.49737	4.8424	8.66375e-07	5.59895e-05	3.94144e-05	ENSMUSG00000031849/ENSMUSG00000034881/ENSMUSG00000007097/ENSMUSG00000031980/ENSMUSG00000027077/ENSMUSG00000047250/ENSMUSG00000020122/ENSMUSG00000033174/ENSMUSG00000030098/ENSMUSG00000053004/ENSMUSG00000049112/ENSMUSG00000045534/ENSMUSG00000049511/ENSMUSG00000025026/ENSMUSG00000034765/ENSMUSG00000033717/ENSMUSG00000026432/ENSMUSG00000051980/ENSMUSG00000031616/ENSMUSG00000001729/ENSMUSG00000021109/…	75
GO:0007015	actin filament organization	249/7589	427/16212	0.583138	1.24573	4.82743	8.93348e-07	5.71374e-05	4.02225e-05	ENSMUSG00000001946/ENSMUSG00000031078/ENSMUSG00000037519/ENSMUSG00000004665/ENSMUSG00000031799/ENSMUSG00000033335/ENSMUSG00000035407/ENSMUSG00000034226/ENSMUSG00000041734/ENSMUSG00000026547/ENSMUSG00000031972/ENSMUSG00000039960/ENSMUSG00000024043/ENSMUSG00000030691/ENSMUSG00000032812/ENSMUSG00000024942/ENSMUSG00000026879/ENSMUSG00000037643/ENSMUSG00000051136/ENSMUSG00000043850/ENSMUSG00000027805/…	249
GO:0099173	postsynapse organization	171/7589	280/16212	0.610714	1.30464	4.82388	9.36955e-07	5.9315e-05	4.17554e-05	ENSMUSG00000020689/ENSMUSG00000037541/ENSMUSG00000031078/ENSMUSG00000021994/ENSMUSG00000013236/ENSMUSG00000028556/ENSMUSG00000024969/ENSMUSG00000044667/ENSMUSG00000030093/ENSMUSG00000030098/ENSMUSG00000030257/ENSMUSG00000051136/ENSMUSG00000063887/ENSMUSG00000027668/ENSMUSG00000052372/ENSMUSG00000022377/ENSMUSG00000021750/ENSMUSG00000022602/ENSMUSG00000034730/ENSMUSG00000036907/ENSMUSG00000026341/…	171
GO:0060041	retina development in camera-type eye	118/7589	183/16212	0.644809	1.37747	4.81754	9.88185e-07	6.1059e-05	4.29831e-05	ENSMUSG00000038119/ENSMUSG00000034708/ENSMUSG00000023175/ENSMUSG00000061780/ENSMUSG00000001911/ENSMUSG00000028174/ENSMUSG00000047407/ENSMUSG00000032796/ENSMUSG00000079415/ENSMUSG00000024913/ENSMUSG00000000247/ENSMUSG00000061393/ENSMUSG00000030324/ENSMUSG00000027671/ENSMUSG00000028949/ENSMUSG00000026463/ENSMUSG00000049353/ENSMUSG00000010175/ENSMUSG00000039239/ENSMUSG00000022656/ENSMUSG00000098274/…	118
GO:0003158	endothelium development	91/7589	135/16212	0.674074	1.43999	4.81588	1.0006e-06	6.1059e-05	4.29831e-05	ENSMUSG00000032125/ENSMUSG00000050288/ENSMUSG00000023175/ENSMUSG00000034917/ENSMUSG00000013236/ENSMUSG00000032508/ENSMUSG00000031980/ENSMUSG00000110195/ENSMUSG00000061393/ENSMUSG00000021381/ENSMUSG00000003154/ENSMUSG00000045382/ENSMUSG00000016494/ENSMUSG00000010175/ENSMUSG00000045095/ENSMUSG00000022512/ENSMUSG00000036885/ENSMUSG00000044674/ENSMUSG00000006932/ENSMUSG00000031616/ENSMUSG00000030551/…	91
GO:0035904	aorta development	54/7589	72/16212	0.75	1.60219	4.80412	1.00387e-06	6.1059e-05	4.29831e-05	ENSMUSG00000032187/ENSMUSG00000033335/ENSMUSG00000110195/ENSMUSG00000044338/ENSMUSG00000057110/ENSMUSG00000033837/ENSMUSG00000045382/ENSMUSG00000029146/ENSMUSG00000010175/ENSMUSG00000030022/ENSMUSG00000039239/ENSMUSG00000031616/ENSMUSG00000051367/ENSMUSG00000024620/ENSMUSG00000054008/ENSMUSG00000037868/ENSMUSG00000025927/ENSMUSG00000024529/ENSMUSG00000001870/ENSMUSG00000015605/ENSMUSG00000019789/…	54
GO:1904377	positive regulation of protein localization to cell periphery	54/7589	72/16212	0.75	1.60219	4.80412	1.00387e-06	6.1059e-05	4.29831e-05	ENSMUSG00000073791/ENSMUSG00000041488/ENSMUSG00000020122/ENSMUSG00000037643/ENSMUSG00000061576/ENSMUSG00000036815/ENSMUSG00000026341/ENSMUSG00000038949/ENSMUSG00000040022/ENSMUSG00000026463/ENSMUSG00000022770/ENSMUSG00000051355/ENSMUSG00000020315/ENSMUSG00000001729/ENSMUSG00000021057/ENSMUSG00000019978/ENSMUSG00000052397/ENSMUSG00000006740/ENSMUSG00000025809/ENSMUSG00000027883/ENSMUSG00000025006/…	54
GO:0045860	positive regulation of protein kinase activity	154/7589	249/16212	0.618474	1.32121	4.79188	1.10707e-06	6.62396e-05	4.663e-05	ENSMUSG00000032041/ENSMUSG00000020689/ENSMUSG00000021994/ENSMUSG00000003068/ENSMUSG00000035027/ENSMUSG00000028519/ENSMUSG00000026556/ENSMUSG00000031980/ENSMUSG00000026883/ENSMUSG00000020122/ENSMUSG00000027699/ENSMUSG00000033542/ENSMUSG00000029687/ENSMUSG00000028944/ENSMUSG00000022376/ENSMUSG00000022607/ENSMUSG00000004451/ENSMUSG00000026187/ENSMUSG00000029166/ENSMUSG00000059456/ENSMUSG00000033717/…	154
GO:0001822	kidney development	199/7589	333/16212	0.597598	1.27662	4.78474	1.12495e-06	6.62396e-05	4.663e-05	ENSMUSG00000041248/ENSMUSG00000032036/ENSMUSG00000020689/ENSMUSG00000018486/ENSMUSG00000031077/ENSMUSG00000021994/ENSMUSG00000038146/ENSMUSG00000044254/ENSMUSG00000026556/ENSMUSG00000031980/ENSMUSG00000039509/ENSMUSG00000022330/ENSMUSG00000049672/ENSMUSG00000042797/ENSMUSG00000024922/ENSMUSG00000057110/ENSMUSG00000061393/ENSMUSG00000031963/ENSMUSG00000030082/ENSMUSG00000030087/ENSMUSG00000029687/…	199
GO:0016331	morphogenesis of embryonic epithelium	110/7589	169/16212	0.650888	1.39046	4.78678	1.1559e-06	6.62396e-05	4.663e-05	ENSMUSG00000031995/ENSMUSG00000018486/ENSMUSG00000021994/ENSMUSG00000036180/ENSMUSG00000026556/ENSMUSG00000022286/ENSMUSG00000022297/ENSMUSG00000047407/ENSMUSG00000054611/ENSMUSG00000000247/ENSMUSG00000030323/ENSMUSG00000002633/ENSMUSG00000022568/ENSMUSG00000026383/ENSMUSG00000038564/ENSMUSG00000017009/ENSMUSG00000018209/ENSMUSG00000030849/ENSMUSG00000039239/ENSMUSG00000038084/ENSMUSG00000022510/…	110
GO:0035296	regulation of tube diameter	110/7589	169/16212	0.650888	1.39046	4.78678	1.1559e-06	6.62396e-05	4.663e-05	ENSMUSG00000031849/ENSMUSG00000034881/ENSMUSG00000007097/ENSMUSG00000031980/ENSMUSG00000027077/ENSMUSG00000047250/ENSMUSG00000020122/ENSMUSG00000033174/ENSMUSG00000030098/ENSMUSG00000053004/ENSMUSG00000049112/ENSMUSG00000028978/ENSMUSG00000045534/ENSMUSG00000022607/ENSMUSG00000038676/ENSMUSG00000049511/ENSMUSG00000025026/ENSMUSG00000034765/ENSMUSG00000033717/ENSMUSG00000042429/ENSMUSG00000026432/…	110
GO:0097746	blood vessel diameter maintenance	110/7589	169/16212	0.650888	1.39046	4.78678	1.1559e-06	6.62396e-05	4.663e-05	ENSMUSG00000031849/ENSMUSG00000034881/ENSMUSG00000007097/ENSMUSG00000031980/ENSMUSG00000027077/ENSMUSG00000047250/ENSMUSG00000020122/ENSMUSG00000033174/ENSMUSG00000030098/ENSMUSG00000053004/ENSMUSG00000049112/ENSMUSG00000028978/ENSMUSG00000045534/ENSMUSG00000022607/ENSMUSG00000038676/ENSMUSG00000049511/ENSMUSG00000025026/ENSMUSG00000034765/ENSMUSG00000033717/ENSMUSG00000042429/ENSMUSG00000026432/…	110
GO:0050673	epithelial cell proliferation	261/7589	451/16212	0.578714	1.23628	4.77405	1.15918e-06	6.62396e-05	4.663e-05	ENSMUSG00000020689/ENSMUSG00000034708/ENSMUSG00000021994/ENSMUSG00000003068/ENSMUSG00000035027/ENSMUSG00000019579/ENSMUSG00000028549/ENSMUSG00000032512/ENSMUSG00000022330/ENSMUSG00000037458/ENSMUSG00000042797/ENSMUSG00000044338/ENSMUSG00000024922/ENSMUSG00000026185/ENSMUSG00000024854/ENSMUSG00000026883/ENSMUSG00000020122/ENSMUSG00000030093/ENSMUSG00000031963/ENSMUSG00000015053/ENSMUSG00000030323/…	261
GO:0007178	cell surface receptor protein serine/threonine kinase signaling pathway	200/7589	335/16212	0.597015	1.27537	4.7778	1.16378e-06	6.62396e-05	4.663e-05	ENSMUSG00000020325/ENSMUSG00000019428/ENSMUSG00000031849/ENSMUSG00000021994/ENSMUSG00000003068/ENSMUSG00000035011/ENSMUSG00000066839/ENSMUSG00000033335/ENSMUSG00000032508/ENSMUSG00000039219/ENSMUSG00000047407/ENSMUSG00000024098/ENSMUSG00000032812/ENSMUSG00000026864/ENSMUSG00000061393/ENSMUSG00000031963/ENSMUSG00000000440/ENSMUSG00000031965/ENSMUSG00000027660/ENSMUSG00000040760/ENSMUSG00000012396/…	200
GO:0043549	regulation of kinase activity	262/7589	453/16212	0.578366	1.23554	4.76989	1.18277e-06	6.67085e-05	4.69601e-05	ENSMUSG00000031996/ENSMUSG00000032041/ENSMUSG00000001774/ENSMUSG00000020689/ENSMUSG00000018411/ENSMUSG00000021994/ENSMUSG00000015312/ENSMUSG00000003068/ENSMUSG00000035027/ENSMUSG00000024212/ENSMUSG00000028519/ENSMUSG00000053318/ENSMUSG00000026556/ENSMUSG00000031980/ENSMUSG00000024913/ENSMUSG00000026883/ENSMUSG00000020122/ENSMUSG00000000440/ENSMUSG00000027699/ENSMUSG00000033542/ENSMUSG00000029687/…	262
GO:0008217	regulation of blood pressure	122/7589	191/16212	0.638743	1.36452	4.75397	1.35514e-06	7.57415e-05	5.3319e-05	ENSMUSG00000009545/ENSMUSG00000034781/ENSMUSG00000034881/ENSMUSG00000007097/ENSMUSG00000031980/ENSMUSG00000051359/ENSMUSG00000024053/ENSMUSG00000024913/ENSMUSG00000047250/ENSMUSG00000030098/ENSMUSG00000000440/ENSMUSG00000049112/ENSMUSG00000009281/ENSMUSG00000028978/ENSMUSG00000040552/ENSMUSG00000038676/ENSMUSG00000022040/ENSMUSG00000042429/ENSMUSG00000070645/ENSMUSG00000026432/ENSMUSG00000027762/…	122
GO:0072001	renal system development	206/7589	347/16212	0.59366	1.26821	4.73785	1.41309e-06	7.8275e-05	5.51025e-05	ENSMUSG00000041248/ENSMUSG00000032036/ENSMUSG00000020689/ENSMUSG00000018486/ENSMUSG00000031077/ENSMUSG00000021994/ENSMUSG00000038146/ENSMUSG00000044254/ENSMUSG00000026556/ENSMUSG00000031980/ENSMUSG00000039509/ENSMUSG00000022330/ENSMUSG00000049672/ENSMUSG00000042797/ENSMUSG00000024922/ENSMUSG00000057110/ENSMUSG00000061393/ENSMUSG00000031963/ENSMUSG00000030082/ENSMUSG00000030087/ENSMUSG00000027684/…	206
GO:0003279	cardiac septum development	82/7589	120/16212	0.683333	1.45977	4.74236	1.44716e-06	7.94528e-05	5.59316e-05	ENSMUSG00000050288/ENSMUSG00000021994/ENSMUSG00000032187/ENSMUSG00000033335/ENSMUSG00000026556/ENSMUSG00000022306/ENSMUSG00000049672/ENSMUSG00000110195/ENSMUSG00000044338/ENSMUSG00000057110/ENSMUSG00000031965/ENSMUSG00000028978/ENSMUSG00000045382/ENSMUSG00000029146/ENSMUSG00000030849/ENSMUSG00000010175/ENSMUSG00000039239/ENSMUSG00000044674/ENSMUSG00000021944/ENSMUSG00000015619/ENSMUSG00000039910/…	82
GO:0003197	endocardial cushion development	40/7589	50/16212	0.8	1.709	4.71033	1.48095e-06	8.05946e-05	5.67354e-05	ENSMUSG00000044338/ENSMUSG00000031965/ENSMUSG00000028978/ENSMUSG00000039239/ENSMUSG00000027358/ENSMUSG00000021944/ENSMUSG00000039910/ENSMUSG00000042812/ENSMUSG00000008999/ENSMUSG00000022676/ENSMUSG00000018604/ENSMUSG00000032179/ENSMUSG00000015627/ENSMUSG00000000567/ENSMUSG00000032744/ENSMUSG00000040289/ENSMUSG00000052504/ENSMUSG00000042258/ENSMUSG00000027276/ENSMUSG00000048450/ENSMUSG00000067336/…	40
GO:0030099	myeloid cell differentiation	251/7589	433/16212	0.579677	1.23833	4.71583	1.54706e-06	8.33062e-05	5.86443e-05	ENSMUSG00000016087/ENSMUSG00000032035/ENSMUSG00000032041/ENSMUSG00000004880/ENSMUSG00000020689/ENSMUSG00000009545/ENSMUSG00000031077/ENSMUSG00000020325/ENSMUSG00000020167/ENSMUSG00000003070/ENSMUSG00000035673/ENSMUSG00000057729/ENSMUSG00000031799/ENSMUSG00000035011/ENSMUSG00000035678/ENSMUSG00000001911/ENSMUSG00000003812/ENSMUSG00000032187/ENSMUSG00000032508/ENSMUSG00000037465/ENSMUSG00000004508/…	251
GO:0048771	tissue remodeling	124/7589	195/16212	0.635897	1.35844	4.72396	1.57021e-06	8.33062e-05	5.86443e-05	ENSMUSG00000020689/ENSMUSG00000034247/ENSMUSG00000003070/ENSMUSG00000057722/ENSMUSG00000031980/ENSMUSG00000024743/ENSMUSG00000024958/ENSMUSG00000024942/ENSMUSG00000026185/ENSMUSG00000024913/ENSMUSG00000020122/ENSMUSG00000061393/ENSMUSG00000079477/ENSMUSG00000000440/ENSMUSG00000028978/ENSMUSG00000059456/ENSMUSG00000049511/ENSMUSG00000039239/ENSMUSG00000022868/ENSMUSG00000022812/ENSMUSG00000035158/…	124
GO:0033674	positive regulation of kinase activity	161/7589	263/16212	0.612167	1.30774	4.72026	1.57106e-06	8.33062e-05	5.86443e-05	ENSMUSG00000032041/ENSMUSG00000020689/ENSMUSG00000021994/ENSMUSG00000003068/ENSMUSG00000035027/ENSMUSG00000028519/ENSMUSG00000026556/ENSMUSG00000031980/ENSMUSG00000026883/ENSMUSG00000020122/ENSMUSG00000027699/ENSMUSG00000033542/ENSMUSG00000029687/ENSMUSG00000028944/ENSMUSG00000022376/ENSMUSG00000022607/ENSMUSG00000004451/ENSMUSG00000026187/ENSMUSG00000059434/ENSMUSG00000029166/ENSMUSG00000059456/…	161
GO:0043087	regulation of GTPase activity	131/7589	208/16212	0.629808	1.34543	4.70372	1.72851e-06	9.08784e-05	6.39748e-05	ENSMUSG00000021994/ENSMUSG00000020135/ENSMUSG00000057729/ENSMUSG00000032714/ENSMUSG00000034116/ENSMUSG00000028556/ENSMUSG00000024096/ENSMUSG00000032812/ENSMUSG00000035392/ENSMUSG00000035437/ENSMUSG00000026883/ENSMUSG00000027699/ENSMUSG00000033542/ENSMUSG00000029687/ENSMUSG00000022377/ENSMUSG00000022568/ENSMUSG00000036104/ENSMUSG00000040022/ENSMUSG00000022508/ENSMUSG00000022812/ENSMUSG00000026727/…	131
GO:0030178	negative regulation of Wnt signaling pathway	96/7589	145/16212	0.662069	1.41434	4.70161	1.77162e-06	9.23625e-05	6.50195e-05	ENSMUSG00000021994/ENSMUSG00000020135/ENSMUSG00000003068/ENSMUSG00000022297/ENSMUSG00000024816/ENSMUSG00000026883/ENSMUSG00000021381/ENSMUSG00000030315/ENSMUSG00000002633/ENSMUSG00000018209/ENSMUSG00000024642/ENSMUSG00000024985/ENSMUSG00000070643/ENSMUSG00000022812/ENSMUSG00000044674/ENSMUSG00000006932/ENSMUSG00000044548/ENSMUSG00000027358/ENSMUSG00000027356/ENSMUSG00000018583/ENSMUSG00000030201/…	96
GO:0032868	response to insulin	164/7589	269/16212	0.609665	1.3024	4.69178	1.80275e-06	9.26838e-05	6.52457e-05	ENSMUSG00000009545/ENSMUSG00000044254/ENSMUSG00000031980/ENSMUSG00000024052/ENSMUSG00000056515/ENSMUSG00000024830/ENSMUSG00000026791/ENSMUSG00000059486/ENSMUSG00000030087/ENSMUSG00000000441/ENSMUSG00000000440/ENSMUSG00000037643/ENSMUSG00000051136/ENSMUSG00000040760/ENSMUSG00000009281/ENSMUSG00000045294/ENSMUSG00000022546/ENSMUSG00000037035/ENSMUSG00000020647/ENSMUSG00000041798/ENSMUSG00000038843/…	164
GO:0060538	skeletal muscle organ development	126/7589	199/16212	0.633166	1.3526	4.69506	1.80766e-06	9.26838e-05	6.52457e-05	ENSMUSG00000032033/ENSMUSG00000038119/ENSMUSG00000031622/ENSMUSG00000001911/ENSMUSG00000034115/ENSMUSG00000007122/ENSMUSG00000031972/ENSMUSG00000024049/ENSMUSG00000027660/ENSMUSG00000022996/ENSMUSG00000027680/ENSMUSG00000025278/ENSMUSG00000002633/ENSMUSG00000022565/ENSMUSG00000026349/ENSMUSG00000024985/ENSMUSG00000026459/ENSMUSG00000020423/ENSMUSG00000026628/ENSMUSG00000027763/ENSMUSG00000044086/…	126
GO:0003231	cardiac ventricle development	92/7589	138/16212	0.666667	1.42417	4.69442	1.83715e-06	9.34234e-05	6.57664e-05	ENSMUSG00000050288/ENSMUSG00000021994/ENSMUSG00000006235/ENSMUSG00000032187/ENSMUSG00000033335/ENSMUSG00000026556/ENSMUSG00000022286/ENSMUSG00000022306/ENSMUSG00000110195/ENSMUSG00000044338/ENSMUSG00000057110/ENSMUSG00000031965/ENSMUSG00000028978/ENSMUSG00000028949/ENSMUSG00000033837/ENSMUSG00000045382/ENSMUSG00000030849/ENSMUSG00000010175/ENSMUSG00000037624/ENSMUSG00000039239/ENSMUSG00000044674/…	92
GO:0043547	positive regulation of GTPase activity	97/7589	147/16212	0.659864	1.40963	4.6804	1.96605e-06	9.84855e-05	6.93299e-05	ENSMUSG00000021994/ENSMUSG00000020135/ENSMUSG00000057729/ENSMUSG00000032714/ENSMUSG00000034116/ENSMUSG00000028556/ENSMUSG00000024096/ENSMUSG00000032812/ENSMUSG00000035392/ENSMUSG00000027699/ENSMUSG00000033542/ENSMUSG00000029687/ENSMUSG00000022377/ENSMUSG00000022568/ENSMUSG00000036104/ENSMUSG00000040022/ENSMUSG00000022812/ENSMUSG00000026727/ENSMUSG00000037533/ENSMUSG00000028300/ENSMUSG00000070509/…	97
GO:1901888	regulation of cell junction assembly	166/7589	273/16212	0.608059	1.29897	4.67347	1.96844e-06	9.84855e-05	6.93299e-05	ENSMUSG00000045776/ENSMUSG00000021994/ENSMUSG00000013236/ENSMUSG00000013033/ENSMUSG00000031980/ENSMUSG00000044338/ENSMUSG00000047787/ENSMUSG00000030093/ENSMUSG00000034312/ENSMUSG00000034269/ENSMUSG00000030257/ENSMUSG00000049112/ENSMUSG00000051136/ENSMUSG00000063887/ENSMUSG00000052372/ENSMUSG00000021750/ENSMUSG00000033707/ENSMUSG00000034730/ENSMUSG00000022607/ENSMUSG00000026383/ENSMUSG00000026341/…	166
GO:0030513	positive regulation of BMP signaling pathway	30/7589	35/16212	0.857143	1.83107	4.61733	2.0196e-06	0.000100237	7.05627e-05	ENSMUSG00000019428/ENSMUSG00000024098/ENSMUSG00000031965/ENSMUSG00000021944/ENSMUSG00000056004/ENSMUSG00000020802/ENSMUSG00000005836/ENSMUSG00000063632/ENSMUSG00000048450/ENSMUSG00000048001/ENSMUSG00000000530/ENSMUSG00000066306/ENSMUSG00000032340/ENSMUSG00000027878/ENSMUSG00000038677/ENSMUSG00000045333/ENSMUSG00000026814/ENSMUSG00000026923/ENSMUSG00000039191/ENSMUSG00000025427/ENSMUSG00000024563/…	30
GO:0048562	embryonic organ morphogenesis	183/7589	305/16212	0.6	1.28175	4.66002	2.0839e-06	0.000102607	7.22313e-05	ENSMUSG00000018486/ENSMUSG00000050288/ENSMUSG00000009545/ENSMUSG00000031074/ENSMUSG00000021994/ENSMUSG00000054708/ENSMUSG00000032187/ENSMUSG00000040726/ENSMUSG00000026556/ENSMUSG00000022330/ENSMUSG00000022286/ENSMUSG00000022297/ENSMUSG00000044338/ENSMUSG00000054611/ENSMUSG00000015053/ENSMUSG00000030323/ENSMUSG00000030302/ENSMUSG00000031965/ENSMUSG00000027676/ENSMUSG00000043850/ENSMUSG00000045294/…	183
GO:0055123	digestive system development	98/7589	149/16212	0.657718	1.40505	4.65969	2.17521e-06	0.00010626	7.48027e-05	ENSMUSG00000009545/ENSMUSG00000021994/ENSMUSG00000028173/ENSMUSG00000026556/ENSMUSG00000020122/ENSMUSG00000061393/ENSMUSG00000021381/ENSMUSG00000049112/ENSMUSG00000027676/ENSMUSG00000009281/ENSMUSG00000002633/ENSMUSG00000026383/ENSMUSG00000038564/ENSMUSG00000017697/ENSMUSG00000024985/ENSMUSG00000030849/ENSMUSG00000039239/ENSMUSG00000022510/ENSMUSG00000006932/ENSMUSG00000044548/ENSMUSG00000021109/…	98
GO:0045859	regulation of protein kinase activity	244/7589	421/16212	0.579572	1.23811	4.64392	2.19608e-06	0.000106441	7.49304e-05	ENSMUSG00000031996/ENSMUSG00000032041/ENSMUSG00000001774/ENSMUSG00000020689/ENSMUSG00000021994/ENSMUSG00000015312/ENSMUSG00000003068/ENSMUSG00000035027/ENSMUSG00000024212/ENSMUSG00000028519/ENSMUSG00000026556/ENSMUSG00000031980/ENSMUSG00000024913/ENSMUSG00000026883/ENSMUSG00000020122/ENSMUSG00000000440/ENSMUSG00000027699/ENSMUSG00000033542/ENSMUSG00000029687/ENSMUSG00000028944/ENSMUSG00000022376/…	244
GO:0060560	developmental growth involved in morphogenesis	162/7589	266/16212	0.609023	1.30102	4.64392	2.27498e-06	0.00010941	7.70206e-05	ENSMUSG00000041444/ENSMUSG00000018411/ENSMUSG00000000125/ENSMUSG00000031078/ENSMUSG00000021994/ENSMUSG00000003068/ENSMUSG00000013236/ENSMUSG00000001911/ENSMUSG00000033335/ENSMUSG00000038708/ENSMUSG00000026556/ENSMUSG00000047787/ENSMUSG00000000247/ENSMUSG00000033174/ENSMUSG00000030084/ENSMUSG00000030270/ENSMUSG00000002633/ENSMUSG00000026383/ENSMUSG00000026341/ENSMUSG00000045382/ENSMUSG00000030849/…	162
GO:1903522	regulation of blood circulation	149/7589	242/16212	0.615702	1.31529	4.63596	2.37968e-06	0.000113566	7.99458e-05	ENSMUSG00000032034/ENSMUSG00000061086/ENSMUSG00000034520/ENSMUSG00000009545/ENSMUSG00000031791/ENSMUSG00000034881/ENSMUSG00000034533/ENSMUSG00000040086/ENSMUSG00000007097/ENSMUSG00000031980/ENSMUSG00000027077/ENSMUSG00000047250/ENSMUSG00000020122/ENSMUSG00000033174/ENSMUSG00000053004/ENSMUSG00000049112/ENSMUSG00000038319/ENSMUSG00000028978/ENSMUSG00000045534/ENSMUSG00000038676/ENSMUSG00000017697/…	149
GO:0010594	regulation of endothelial cell migration	104/7589	160/16212	0.65	1.38856	4.63366	2.46296e-06	0.000116643	8.2112e-05	ENSMUSG00000032035/ENSMUSG00000032125/ENSMUSG00000020689/ENSMUSG00000034708/ENSMUSG00000050917/ENSMUSG00000023175/ENSMUSG00000021994/ENSMUSG00000034881/ENSMUSG00000028517/ENSMUSG00000031980/ENSMUSG00000036427/ENSMUSG00000026883/ENSMUSG00000030093/ENSMUSG00000031963/ENSMUSG00000015053/ENSMUSG00000000440/ENSMUSG00000028978/ENSMUSG00000002633/ENSMUSG00000022570/ENSMUSG00000034730/ENSMUSG00000059456/…	104
GO:0009895	negative regulation of catabolic process	197/7589	332/16212	0.593373	1.26759	4.62156	2.49114e-06	0.000116853	8.22599e-05	ENSMUSG00000032041/ENSMUSG00000006498/ENSMUSG00000035242/ENSMUSG00000004937/ENSMUSG00000045193/ENSMUSG00000011305/ENSMUSG00000032508/ENSMUSG00000057722/ENSMUSG00000022283/ENSMUSG00000037458/ENSMUSG00000042797/ENSMUSG00000026883/ENSMUSG00000018189/ENSMUSG00000020122/ENSMUSG00000030317/ENSMUSG00000027680/ENSMUSG00000041247/ENSMUSG00000002633/ENSMUSG00000075590/ENSMUSG00000034730/ENSMUSG00000022607/…	197
GO:0043542	endothelial cell migration	131/7589	209/16212	0.626794	1.33899	4.62728	2.50507e-06	0.000116853	8.22599e-05	ENSMUSG00000032035/ENSMUSG00000032125/ENSMUSG00000020689/ENSMUSG00000034708/ENSMUSG00000050917/ENSMUSG00000023175/ENSMUSG00000021994/ENSMUSG00000034881/ENSMUSG00000028517/ENSMUSG00000031980/ENSMUSG00000036427/ENSMUSG00000026883/ENSMUSG00000030093/ENSMUSG00000031963/ENSMUSG00000015053/ENSMUSG00000000440/ENSMUSG00000028978/ENSMUSG00000002221/ENSMUSG00000002633/ENSMUSG00000022570/ENSMUSG00000034730/…	131
GO:0048708	astrocyte differentiation	61/7589	85/16212	0.717647	1.53307	4.62261	2.58951e-06	0.00011989	8.43981e-05	ENSMUSG00000020932/ENSMUSG00000034708/ENSMUSG00000001911/ENSMUSG00000032193/ENSMUSG00000028517/ENSMUSG00000028519/ENSMUSG00000035305/ENSMUSG00000031980/ENSMUSG00000079415/ENSMUSG00000024735/ENSMUSG00000020122/ENSMUSG00000002633/ENSMUSG00000026341/ENSMUSG00000053024/ENSMUSG00000047261/ENSMUSG00000020128/ENSMUSG00000026728/ENSMUSG00000039005/ENSMUSG00000027358/ENSMUSG00000020009/ENSMUSG00000024431/…	61
GO:0030177	positive regulation of Wnt signaling pathway	87/7589	130/16212	0.669231	1.42964	4.61401	2.72627e-06	0.000125287	8.81974e-05	ENSMUSG00000000125/ENSMUSG00000021994/ENSMUSG00000003345/ENSMUSG00000032187/ENSMUSG00000028173/ENSMUSG00000050447/ENSMUSG00000037487/ENSMUSG00000020122/ENSMUSG00000037989/ENSMUSG00000030079/ENSMUSG00000027630/ENSMUSG00000022996/ENSMUSG00000002633/ENSMUSG00000046380/ENSMUSG00000030849/ENSMUSG00000056342/ENSMUSG00000044548/ENSMUSG00000021096/ENSMUSG00000027358/ENSMUSG00000019850/ENSMUSG00000015133/…	87
GO:0043434	response to peptide hormone	258/7589	449/16212	0.57461	1.22751	4.58642	2.8752e-06	0.00013116	9.23314e-05	ENSMUSG00000020689/ENSMUSG00000018634/ENSMUSG00000009545/ENSMUSG00000023175/ENSMUSG00000031805/ENSMUSG00000003068/ENSMUSG00000044254/ENSMUSG00000028530/ENSMUSG00000035212/ENSMUSG00000036792/ENSMUSG00000031980/ENSMUSG00000024052/ENSMUSG00000056515/ENSMUSG00000024942/ENSMUSG00000026185/ENSMUSG00000024830/ENSMUSG00000024913/ENSMUSG00000026791/ENSMUSG00000059486/ENSMUSG00000026751/ENSMUSG00000030087/…	258
GO:0048738	cardiac muscle tissue development	161/7589	265/16212	0.607547	1.29787	4.58651	2.99627e-06	0.000135685	9.5517e-05	ENSMUSG00000034520/ENSMUSG00000031077/ENSMUSG00000031074/ENSMUSG00000031622/ENSMUSG00000006235/ENSMUSG00000062908/ENSMUSG00000031980/ENSMUSG00000022306/ENSMUSG00000024099/ENSMUSG00000030315/ENSMUSG00000030314/ENSMUSG00000031965/ENSMUSG00000022565/ENSMUSG00000033837/ENSMUSG00000020469/ENSMUSG00000017817/ENSMUSG00000049134/ENSMUSG00000030849/ENSMUSG00000010175/ENSMUSG00000030022/ENSMUSG00000037624/…	161
GO:0048596	embryonic camera-type eye morphogenesis	25/7589	28/16212	0.892857	1.90737	4.50803	3.08213e-06	0.000138562	9.75419e-05	ENSMUSG00000030323/ENSMUSG00000038564/ENSMUSG00000010175/ENSMUSG00000039910/ENSMUSG00000015134/ENSMUSG00000030201/ENSMUSG00000029475/ENSMUSG00000008999/ENSMUSG00000024238/ENSMUSG00000008730/ENSMUSG00000045005/ENSMUSG00000061436/ENSMUSG00000063632/ENSMUSG00000001280/ENSMUSG00000032327/ENSMUSG00000066043/ENSMUSG00000020170/ENSMUSG00000024041/ENSMUSG00000038402/ENSMUSG00000021359/ENSMUSG00000027109/…	25
GO:0072006	nephron development	102/7589	157/16212	0.649682	1.38788	4.58155	3.16955e-06	0.000141467	9.95869e-05	ENSMUSG00000032036/ENSMUSG00000020689/ENSMUSG00000018486/ENSMUSG00000038146/ENSMUSG00000026556/ENSMUSG00000031980/ENSMUSG00000039509/ENSMUSG00000042797/ENSMUSG00000030082/ENSMUSG00000030087/ENSMUSG00000002633/ENSMUSG00000040552/ENSMUSG00000016494/ENSMUSG00000022770/ENSMUSG00000006932/ENSMUSG00000031616/ENSMUSG00000051367/ENSMUSG00000034460/ENSMUSG00000027358/ENSMUSG00000015619/ENSMUSG00000005583/…	102
GO:0050678	regulation of epithelial cell proliferation	217/7589	371/16212	0.584906	1.2495	4.56081	3.2966e-06	0.000146086	0.000102839	ENSMUSG00000020689/ENSMUSG00000034708/ENSMUSG00000021994/ENSMUSG00000003068/ENSMUSG00000019579/ENSMUSG00000028549/ENSMUSG00000032512/ENSMUSG00000022330/ENSMUSG00000037458/ENSMUSG00000042797/ENSMUSG00000044338/ENSMUSG00000024922/ENSMUSG00000024854/ENSMUSG00000026883/ENSMUSG00000020122/ENSMUSG00000030093/ENSMUSG00000015053/ENSMUSG00000030323/ENSMUSG00000000440/ENSMUSG00000051136/ENSMUSG00000022996/…	217
GO:0010507	negative regulation of autophagy	56/7589	77/16212	0.727273	1.55364	4.56829	3.36084e-06	0.000147877	0.0001041	ENSMUSG00000057722/ENSMUSG00000075590/ENSMUSG00000022607/ENSMUSG00000056121/ENSMUSG00000016529/ENSMUSG00000047443/ENSMUSG00000002845/ENSMUSG00000001729/ENSMUSG00000021944/ENSMUSG00000001630/ENSMUSG00000019850/ENSMUSG00000024101/ENSMUSG00000045962/ENSMUSG00000040010/ENSMUSG00000028278/ENSMUSG00000027843/ENSMUSG00000057329/ENSMUSG00000029192/ENSMUSG00000049323/ENSMUSG00000028646/ENSMUSG00000029592/…	56
GO:0071902	positive regulation of protein serine/threonine kinase activity	89/7589	134/16212	0.664179	1.41885	4.56736	3.4129e-06	0.00014911	0.000104968	ENSMUSG00000032041/ENSMUSG00000021994/ENSMUSG00000035027/ENSMUSG00000026556/ENSMUSG00000031980/ENSMUSG00000026883/ENSMUSG00000020122/ENSMUSG00000033542/ENSMUSG00000029687/ENSMUSG00000004451/ENSMUSG00000029166/ENSMUSG00000033717/ENSMUSG00000010175/ENSMUSG00000016984/ENSMUSG00000031714/ENSMUSG00000001729/ENSMUSG00000039005/ENSMUSG00000020901/ENSMUSG00000071369/ENSMUSG00000036585/ENSMUSG00000024620/…	89
GO:0032956	regulation of actin cytoskeleton organization	191/7589	322/16212	0.593168	1.26715	4.54251	3.63515e-06	0.000157677	0.000110999	ENSMUSG00000001946/ENSMUSG00000020689/ENSMUSG00000031078/ENSMUSG00000037519/ENSMUSG00000035407/ENSMUSG00000041734/ENSMUSG00000026556/ENSMUSG00000024043/ENSMUSG00000030691/ENSMUSG00000032812/ENSMUSG00000024942/ENSMUSG00000026879/ENSMUSG00000027699/ENSMUSG00000027805/ENSMUSG00000033542/ENSMUSG00000022378/ENSMUSG00000015766/ENSMUSG00000021750/ENSMUSG00000022580/ENSMUSG00000026341/ENSMUSG00000015733/…	191
GO:0021915	neural tube development	114/7589	179/16212	0.636872	1.36052	4.55001	3.65982e-06	0.000157677	0.000110999	ENSMUSG00000031995/ENSMUSG00000019428/ENSMUSG00000021994/ENSMUSG00000036180/ENSMUSG00000061887/ENSMUSG00000026556/ENSMUSG00000039509/ENSMUSG00000022286/ENSMUSG00000022297/ENSMUSG00000047407/ENSMUSG00000054611/ENSMUSG00000000247/ENSMUSG00000030323/ENSMUSG00000002633/ENSMUSG00000022568/ENSMUSG00000038564/ENSMUSG00000017009/ENSMUSG00000018209/ENSMUSG00000024985/ENSMUSG00000026640/ENSMUSG00000039239/…	114
GO:0055001	muscle cell development	138/7589	223/16212	0.618834	1.32198	4.54197	3.74807e-06	0.000160366	0.000112891	ENSMUSG00000031849/ENSMUSG00000007122/ENSMUSG00000031980/ENSMUSG00000031972/ENSMUSG00000024049/ENSMUSG00000030314/ENSMUSG00000022996/ENSMUSG00000022565/ENSMUSG00000037432/ENSMUSG00000067653/ENSMUSG00000049134/ENSMUSG00000026459/ENSMUSG00000042451/ENSMUSG00000010175/ENSMUSG00000044086/ENSMUSG00000022812/ENSMUSG00000022803/ENSMUSG00000020160/ENSMUSG00000031616/ENSMUSG00000051367/ENSMUSG00000034460/…	138
GO:0090287	regulation of cellular response to growth factor stimulus	175/7589	292/16212	0.599315	1.28029	4.53409	3.81176e-06	0.00016122	0.000113493	ENSMUSG00000050917/ENSMUSG00000020325/ENSMUSG00000019428/ENSMUSG00000021994/ENSMUSG00000003068/ENSMUSG00000035011/ENSMUSG00000033335/ENSMUSG00000031980/ENSMUSG00000039219/ENSMUSG00000024098/ENSMUSG00000026864/ENSMUSG00000026883/ENSMUSG00000031963/ENSMUSG00000000440/ENSMUSG00000031965/ENSMUSG00000027660/ENSMUSG00000012396/ENSMUSG00000059895/ENSMUSG00000024074/ENSMUSG00000027661/ENSMUSG00000024985/…	175
GO:0071900	regulation of protein serine/threonine kinase activity	145/7589	236/16212	0.614407	1.31253	4.53708	3.82002e-06	0.00016122	0.000113493	ENSMUSG00000032041/ENSMUSG00000001774/ENSMUSG00000021994/ENSMUSG00000035027/ENSMUSG00000026556/ENSMUSG00000031980/ENSMUSG00000024913/ENSMUSG00000026883/ENSMUSG00000020122/ENSMUSG00000000440/ENSMUSG00000033542/ENSMUSG00000029687/ENSMUSG00000004451/ENSMUSG00000029166/ENSMUSG00000024975/ENSMUSG00000033717/ENSMUSG00000010175/ENSMUSG00000016984/ENSMUSG00000031714/ENSMUSG00000001729/ENSMUSG00000039005/…	145
GO:0060411	cardiac septum morphogenesis	54/7589	74/16212	0.72973	1.55889	4.52045	4.23533e-06	0.00017754	0.000124981	ENSMUSG00000050288/ENSMUSG00000026556/ENSMUSG00000022306/ENSMUSG00000044338/ENSMUSG00000031965/ENSMUSG00000028978/ENSMUSG00000030849/ENSMUSG00000010175/ENSMUSG00000039239/ENSMUSG00000044674/ENSMUSG00000021944/ENSMUSG00000039910/ENSMUSG00000030201/ENSMUSG00000008999/ENSMUSG00000025810/ENSMUSG00000018604/ENSMUSG00000032179/ENSMUSG00000020644/ENSMUSG00000025969/ENSMUSG00000032744/ENSMUSG00000019789/…	54
GO:0031214	biomineral tissue development	111/7589	174/16212	0.637931	1.36278	4.51347	4.35829e-06	0.000181468	0.000127747	ENSMUSG00000025489/ENSMUSG00000031849/ENSMUSG00000035673/ENSMUSG00000001911/ENSMUSG00000028173/ENSMUSG00000022330/ENSMUSG00000037465/ENSMUSG00000061393/ENSMUSG00000030302/ENSMUSG00000022996/ENSMUSG00000028978/ENSMUSG00000030218/ENSMUSG00000046761/ENSMUSG00000059456/ENSMUSG00000037408/ENSMUSG00000024985/ENSMUSG00000030849/ENSMUSG00000026280/ENSMUSG00000022868/ENSMUSG00000025784/ENSMUSG00000025804/…	111
GO:0031589	cell-substrate adhesion	198/7589	336/16212	0.589286	1.25886	4.49816	4.46029e-06	0.000184477	0.000129865	ENSMUSG00000020689/ENSMUSG00000034664/ENSMUSG00000031078/ENSMUSG00000033335/ENSMUSG00000028553/ENSMUSG00000031980/ENSMUSG00000027962/ENSMUSG00000037966/ENSMUSG00000064080/ENSMUSG00000039286/ENSMUSG00000021750/ENSMUSG00000022570/ENSMUSG00000022580/ENSMUSG00000022607/ENSMUSG00000026383/ENSMUSG00000024076/ENSMUSG00000031841/ENSMUSG00000059456/ENSMUSG00000017009/ENSMUSG00000018209/ENSMUSG00000025082/…	198
GO:0060828	regulation of canonical Wnt signaling pathway	137/7589	222/16212	0.617117	1.31832	4.48001	5.01564e-06	0.000206073	0.000145067	ENSMUSG00000021994/ENSMUSG00000003345/ENSMUSG00000020135/ENSMUSG00000003068/ENSMUSG00000028173/ENSMUSG00000050447/ENSMUSG00000037487/ENSMUSG00000022297/ENSMUSG00000024816/ENSMUSG00000026883/ENSMUSG00000020122/ENSMUSG00000037989/ENSMUSG00000030079/ENSMUSG00000027630/ENSMUSG00000022996/ENSMUSG00000002633/ENSMUSG00000046380/ENSMUSG00000018209/ENSMUSG00000024642/ENSMUSG00000024985/ENSMUSG00000030849/…	137
GO:0050769	positive regulation of neurogenesis	175/7589	293/16212	0.59727	1.27592	4.47118	5.1138e-06	0.000208724	0.000146933	ENSMUSG00000041444/ENSMUSG00000038119/ENSMUSG00000018411/ENSMUSG00000000125/ENSMUSG00000020932/ENSMUSG00000021994/ENSMUSG00000003068/ENSMUSG00000007594/ENSMUSG00000035027/ENSMUSG00000028173/ENSMUSG00000038708/ENSMUSG00000024735/ENSMUSG00000020122/ENSMUSG00000030084/ENSMUSG00000000440/ENSMUSG00000037643/ENSMUSG00000027660/ENSMUSG00000027692/ENSMUSG00000027668/ENSMUSG00000027680/ENSMUSG00000028949/…	175
GO:0015846	polyamine transport	16/7589	16/16212	1	2.13625	4.26577	5.27122e-06	0.000212565	0.000149637	ENSMUSG00000035242/ENSMUSG00000037458/ENSMUSG00000022533/ENSMUSG00000038094/ENSMUSG00000048939/ENSMUSG00000037455/ENSMUSG00000023829/ENSMUSG00000040966/ENSMUSG00000023828/ENSMUSG00000028789/ENSMUSG00000008496/ENSMUSG00000010122/ENSMUSG00000028141/ENSMUSG00000019834/ENSMUSG00000036622/ENSMUSG00000040652	16
GO:0071559	response to transforming growth factor beta	152/7589	250/16212	0.608	1.29884	4.46717	5.27644e-06	0.000212565	0.000149637	ENSMUSG00000021994/ENSMUSG00000003068/ENSMUSG00000035011/ENSMUSG00000033335/ENSMUSG00000039219/ENSMUSG00000024098/ENSMUSG00000032812/ENSMUSG00000026864/ENSMUSG00000030093/ENSMUSG00000000440/ENSMUSG00000027660/ENSMUSG00000040760/ENSMUSG00000028978/ENSMUSG00000033837/ENSMUSG00000022607/ENSMUSG00000026383/ENSMUSG00000026341/ENSMUSG00000038552/ENSMUSG00000027661/ENSMUSG00000006205/ENSMUSG00000039239/…	152
GO:0099003	vesicle-mediated transport in synapse	168/7589	280/16212	0.6	1.28175	4.46145	5.36989e-06	0.000214934	0.000151305	ENSMUSG00000020689/ENSMUSG00000034708/ENSMUSG00000020198/ENSMUSG00000006276/ENSMUSG00000032714/ENSMUSG00000034902/ENSMUSG00000034656/ENSMUSG00000033335/ENSMUSG00000028528/ENSMUSG00000028524/ENSMUSG00000019478/ENSMUSG00000041488/ENSMUSG00000024743/ENSMUSG00000035392/ENSMUSG00000030093/ENSMUSG00000034312/ENSMUSG00000079477/ENSMUSG00000030098/ENSMUSG00000009394/ENSMUSG00000030314/ENSMUSG00000027695/…	168
GO:0010976	positive regulation of neuron projection development	133/7589	215/16212	0.618605	1.32149	4.45185	5.73128e-06	0.000227929	0.000160453	ENSMUSG00000032128/ENSMUSG00000018411/ENSMUSG00000034708/ENSMUSG00000025147/ENSMUSG00000006498/ENSMUSG00000003575/ENSMUSG00000021994/ENSMUSG00000035486/ENSMUSG00000006235/ENSMUSG00000035305/ENSMUSG00000028176/ENSMUSG00000036913/ENSMUSG00000031980/ENSMUSG00000079415/ENSMUSG00000024969/ENSMUSG00000026864/ENSMUSG00000026883/ENSMUSG00000037643/ENSMUSG00000063887/ENSMUSG00000027668/ENSMUSG00000029687/…	133
GO:0045446	endothelial cell differentiation	77/7589	114/16212	0.675439	1.44291	4.4519	5.93463e-06	0.000234512	0.000165087	ENSMUSG00000032125/ENSMUSG00000050288/ENSMUSG00000034917/ENSMUSG00000013236/ENSMUSG00000032508/ENSMUSG00000031980/ENSMUSG00000110195/ENSMUSG00000061393/ENSMUSG00000021381/ENSMUSG00000003154/ENSMUSG00000045382/ENSMUSG00000010175/ENSMUSG00000045095/ENSMUSG00000022512/ENSMUSG00000036885/ENSMUSG00000044674/ENSMUSG00000006932/ENSMUSG00000031616/ENSMUSG00000030551/ENSMUSG00000030516/ENSMUSG00000090698/…	77
GO:0097191	extrinsic apoptotic signaling pathway	134/7589	217/16212	0.617512	1.31916	4.4403	6.0421e-06	0.000237248	0.000167013	ENSMUSG00000031078/ENSMUSG00000031077/ENSMUSG00000031805/ENSMUSG00000020190/ENSMUSG00000019489/ENSMUSG00000005824/ENSMUSG00000013698/ENSMUSG00000031980/ENSMUSG00000024901/ENSMUSG00000026883/ENSMUSG00000026875/ENSMUSG00000000441/ENSMUSG00000027660/ENSMUSG00000022564/ENSMUSG00000018209/ENSMUSG00000017897/ENSMUSG00000024985/ENSMUSG00000030847/ENSMUSG00000030849/ENSMUSG00000016524/ENSMUSG00000042474/…	134
GO:0051090	regulation of DNA-binding transcription factor activity	190/7589	322/16212	0.590062	1.26052	4.42971	6.14648e-06	0.000239797	0.000168808	ENSMUSG00000032041/ENSMUSG00000050288/ENSMUSG00000003575/ENSMUSG00000020167/ENSMUSG00000021994/ENSMUSG00000048148/ENSMUSG00000034889/ENSMUSG00000004934/ENSMUSG00000035011/ENSMUSG00000047123/ENSMUSG00000001911/ENSMUSG00000032187/ENSMUSG00000032185/ENSMUSG00000028517/ENSMUSG00000032508/ENSMUSG00000035305/ENSMUSG00000028179/ENSMUSG00000032497/ENSMUSG00000022297/ENSMUSG00000024913/ENSMUSG00000056216/…	190
GO:0035051	cardiocyte differentiation	116/7589	184/16212	0.630435	1.34677	4.43786	6.18433e-06	0.000239797	0.000168808	ENSMUSG00000062908/ENSMUSG00000026556/ENSMUSG00000031980/ENSMUSG00000027962/ENSMUSG00000020122/ENSMUSG00000030314/ENSMUSG00000022565/ENSMUSG00000024975/ENSMUSG00000049134/ENSMUSG00000010175/ENSMUSG00000039239/ENSMUSG00000027770/ENSMUSG00000022812/ENSMUSG00000022803/ENSMUSG00000020160/ENSMUSG00000006932/ENSMUSG00000031616/ENSMUSG00000027358/ENSMUSG00000021944/ENSMUSG00000068614/ENSMUSG00000005583/…	116
GO:0060021	roof of mouth development	66/7589	95/16212	0.694737	1.48413	4.43967	6.30163e-06	0.000242828	0.000170941	ENSMUSG00000018486/ENSMUSG00000050288/ENSMUSG00000021994/ENSMUSG00000022330/ENSMUSG00000061393/ENSMUSG00000030093/ENSMUSG00000045294/ENSMUSG00000002633/ENSMUSG00000038564/ENSMUSG00000040268/ENSMUSG00000026638/ENSMUSG00000039239/ENSMUSG00000022770/ENSMUSG00000044674/ENSMUSG00000005583/ENSMUSG00000045680/ENSMUSG00000030201/ENSMUSG00000035569/ENSMUSG00000024247/ENSMUSG00000022676/ENSMUSG00000012282/…	66
GO:1903829	positive regulation of protein localization	281/7589	497/16212	0.565392	1.20782	4.41443	6.3589e-06	0.000243522	0.00017143	ENSMUSG00000018411/ENSMUSG00000031075/ENSMUSG00000006498/ENSMUSG00000023175/ENSMUSG00000034781/ENSMUSG00000035242/ENSMUSG00000003068/ENSMUSG00000035722/ENSMUSG00000028518/ENSMUSG00000073791/ENSMUSG00000028530/ENSMUSG00000057722/ENSMUSG00000028173/ENSMUSG00000037487/ENSMUSG00000024049/ENSMUSG00000052105/ENSMUSG00000024687/ENSMUSG00000041488/ENSMUSG00000026880/ENSMUSG00000020122/ENSMUSG00000030098/…	281
GO:0007519	skeletal muscle tissue development	117/7589	186/16212	0.629032	1.34377	4.42364	6.60003e-06	0.000251206	0.000176839	ENSMUSG00000032033/ENSMUSG00000038119/ENSMUSG00000031622/ENSMUSG00000001911/ENSMUSG00000007122/ENSMUSG00000031972/ENSMUSG00000024049/ENSMUSG00000027660/ENSMUSG00000022996/ENSMUSG00000025278/ENSMUSG00000002633/ENSMUSG00000022565/ENSMUSG00000026349/ENSMUSG00000024985/ENSMUSG00000026459/ENSMUSG00000020423/ENSMUSG00000026628/ENSMUSG00000027763/ENSMUSG00000044086/ENSMUSG00000022803/ENSMUSG00000020128/…	117
GO:0038127	ERBB signaling pathway	78/7589	116/16212	0.672414	1.43644	4.42554	6.71188e-06	0.000253905	0.000178739	ENSMUSG00000035890/ENSMUSG00000035027/ENSMUSG00000031980/ENSMUSG00000026883/ENSMUSG00000020122/ENSMUSG00000079477/ENSMUSG00000000441/ENSMUSG00000022607/ENSMUSG00000004451/ENSMUSG00000031841/ENSMUSG00000059456/ENSMUSG00000033717/ENSMUSG00000025083/ENSMUSG00000026417/ENSMUSG00000020467/ENSMUSG00000020458/ENSMUSG00000031714/ENSMUSG00000001729/ENSMUSG00000021055/ENSMUSG00000060275/ENSMUSG00000024486/…	78
GO:1902105	regulation of leukocyte differentiation	184/7589	311/16212	0.59164	1.26389	4.40819	6.80445e-06	0.000255847	0.000180106	ENSMUSG00000020689/ENSMUSG00000031077/ENSMUSG00000020325/ENSMUSG00000031805/ENSMUSG00000020198/ENSMUSG00000024002/ENSMUSG00000035011/ENSMUSG00000035678/ENSMUSG00000032187/ENSMUSG00000053318/ENSMUSG00000037465/ENSMUSG00000024958/ENSMUSG00000037966/ENSMUSG00000015053/ENSMUSG00000022996/ENSMUSG00000027671/ENSMUSG00000029810/ENSMUSG00000028949/ENSMUSG00000002633/ENSMUSG00000022556/ENSMUSG00000017697/…	184
GO:0048863	stem cell differentiation	151/7589	249/16212	0.606426	1.29548	4.40792	6.93883e-06	0.000259328	0.000182557	ENSMUSG00000000125/ENSMUSG00000036180/ENSMUSG00000001227/ENSMUSG00000040726/ENSMUSG00000026873/ENSMUSG00000030093/ENSMUSG00000029687/ENSMUSG00000002633/ENSMUSG00000012396/ENSMUSG00000030111/ENSMUSG00000026187/ENSMUSG00000024079/ENSMUSG00000024063/ENSMUSG00000030849/ENSMUSG00000026193/ENSMUSG00000039239/ENSMUSG00000022510/ENSMUSG00000030031/ENSMUSG00000027770/ENSMUSG00000022812/ENSMUSG00000044674/…	151
GO:0051091	positive regulation of DNA-binding transcription factor activity	118/7589	188/16212	0.62766	1.34084	4.4097	7.03298e-06	0.000261273	0.000183926	ENSMUSG00000032041/ENSMUSG00000050288/ENSMUSG00000003575/ENSMUSG00000020167/ENSMUSG00000021994/ENSMUSG00000035011/ENSMUSG00000047123/ENSMUSG00000032187/ENSMUSG00000032185/ENSMUSG00000028517/ENSMUSG00000032508/ENSMUSG00000035305/ENSMUSG00000028179/ENSMUSG00000032497/ENSMUSG00000024913/ENSMUSG00000026875/ENSMUSG00000000440/ENSMUSG00000060477/ENSMUSG00000037643/ENSMUSG00000022996/ENSMUSG00000033542/…	118
GO:0001837	epithelial to mesenchymal transition	102/7589	159/16212	0.641509	1.37042	4.4034	7.32314e-06	0.000268829	0.000189245	ENSMUSG00000021994/ENSMUSG00000040651/ENSMUSG00000026556/ENSMUSG00000031980/ENSMUSG00000026883/ENSMUSG00000031965/ENSMUSG00000029687/ENSMUSG00000022607/ENSMUSG00000026383/ENSMUSG00000024975/ENSMUSG00000024985/ENSMUSG00000030849/ENSMUSG00000039239/ENSMUSG00000030031/ENSMUSG00000022812/ENSMUSG00000068284/ENSMUSG00000045671/ENSMUSG00000020458/ENSMUSG00000006932/ENSMUSG00000031616/ENSMUSG00000021109/…	102
GO:0014910	regulation of smooth muscle cell migration	67/7589	97/16212	0.690722	1.47555	4.40695	7.34921e-06	0.000268829	0.000189245	ENSMUSG00000020689/ENSMUSG00000028556/ENSMUSG00000031980/ENSMUSG00000026185/ENSMUSG00000030084/ENSMUSG00000000440/ENSMUSG00000022607/ENSMUSG00000039005/ENSMUSG00000005583/ENSMUSG00000024620/ENSMUSG00000028284/ENSMUSG00000025810/ENSMUSG00000038418/ENSMUSG00000036564/ENSMUSG00000052920/ENSMUSG00000057329/ENSMUSG00000022469/ENSMUSG00000027750/ENSMUSG00000020681/ENSMUSG00000042121/ENSMUSG00000021699/…	67
GO:0072132	mesenchyme morphogenesis	42/7589	55/16212	0.763636	1.63132	4.39964	7.36637e-06	0.000268829	0.000189245	ENSMUSG00000021994/ENSMUSG00000031972/ENSMUSG00000044338/ENSMUSG00000031965/ENSMUSG00000028978/ENSMUSG00000039239/ENSMUSG00000006932/ENSMUSG00000027358/ENSMUSG00000068614/ENSMUSG00000042812/ENSMUSG00000008999/ENSMUSG00000022676/ENSMUSG00000018604/ENSMUSG00000032179/ENSMUSG00000015627/ENSMUSG00000059430/ENSMUSG00000000567/ENSMUSG00000029556/ENSMUSG00000032744/ENSMUSG00000040289/ENSMUSG00000042258/…	42
GO:0042176	regulation of protein catabolic process	198/7589	338/16212	0.585799	1.25141	4.38198	7.61587e-06	0.000276214	0.000194443	ENSMUSG00000034187/ENSMUSG00000020932/ENSMUSG00000021994/ENSMUSG00000035242/ENSMUSG00000004937/ENSMUSG00000020235/ENSMUSG00000032193/ENSMUSG00000044254/ENSMUSG00000022280/ENSMUSG00000037458/ENSMUSG00000003279/ENSMUSG00000042797/ENSMUSG00000024740/ENSMUSG00000026883/ENSMUSG00000018189/ENSMUSG00000020122/ENSMUSG00000079477/ENSMUSG00000030317/ENSMUSG00000030315/ENSMUSG00000030314/ENSMUSG00000022996/…	198
GO:0001704	formation of primary germ layer	75/7589	111/16212	0.675676	1.44341	4.39755	7.65776e-06	0.000276214	0.000194443	ENSMUSG00000020689/ENSMUSG00000000125/ENSMUSG00000021994/ENSMUSG00000066839/ENSMUSG00000028173/ENSMUSG00000024098/ENSMUSG00000036427/ENSMUSG00000012396/ENSMUSG00000026383/ENSMUSG00000034765/ENSMUSG00000026193/ENSMUSG00000026639/ENSMUSG00000026768/ENSMUSG00000006932/ENSMUSG00000068196/ENSMUSG00000031681/ENSMUSG00000027966/ENSMUSG00000021944/ENSMUSG00000042812/ENSMUSG00000008999/ENSMUSG00000024134/…	75
GO:2001236	regulation of extrinsic apoptotic signaling pathway	98/7589	152/16212	0.644737	1.37732	4.38456	8.00941e-06	0.000287227	0.000202197	ENSMUSG00000031078/ENSMUSG00000031077/ENSMUSG00000031805/ENSMUSG00000005824/ENSMUSG00000013698/ENSMUSG00000031980/ENSMUSG00000024901/ENSMUSG00000026875/ENSMUSG00000000441/ENSMUSG00000027660/ENSMUSG00000022564/ENSMUSG00000018209/ENSMUSG00000017897/ENSMUSG00000024985/ENSMUSG00000016524/ENSMUSG00000042474/ENSMUSG00000026628/ENSMUSG00000039239/ENSMUSG00000022812/ENSMUSG00000039005/ENSMUSG00000019850/…	98
GO:0031331	positive regulation of cellular catabolic process	133/7589	216/16212	0.615741	1.31538	4.37742	8.06932e-06	0.000287713	0.000202539	ENSMUSG00000003068/ENSMUSG00000011305/ENSMUSG00000047123/ENSMUSG00000032193/ENSMUSG00000028618/ENSMUSG00000044254/ENSMUSG00000028518/ENSMUSG00000023460/ENSMUSG00000024900/ENSMUSG00000028007/ENSMUSG00000030314/ENSMUSG00000004451/ENSMUSG00000036104/ENSMUSG00000041798/ENSMUSG00000033717/ENSMUSG00000030847/ENSMUSG00000027761/ENSMUSG00000022812/ENSMUSG00000022708/ENSMUSG00000025241/ENSMUSG00000028082/…	133
GO:0072073	kidney epithelium development	99/7589	154/16212	0.642857	1.3733	4.36661	8.68917e-06	0.000307024	0.000216133	ENSMUSG00000018486/ENSMUSG00000031980/ENSMUSG00000042797/ENSMUSG00000031963/ENSMUSG00000030087/ENSMUSG00000002633/ENSMUSG00000017009/ENSMUSG00000030849/ENSMUSG00000016494/ENSMUSG00000022770/ENSMUSG00000006932/ENSMUSG00000031616/ENSMUSG00000031681/ENSMUSG00000051367/ENSMUSG00000034460/ENSMUSG00000027358/ENSMUSG00000015619/ENSMUSG00000005583/ENSMUSG00000045680/ENSMUSG00000036585/ENSMUSG00000004791/…	99
GO:0071375	cellular response to peptide hormone stimulus	183/7589	310/16212	0.590323	1.26108	4.35402	8.70991e-06	0.000307024	0.000216133	ENSMUSG00000020689/ENSMUSG00000018634/ENSMUSG00000031805/ENSMUSG00000044254/ENSMUSG00000028530/ENSMUSG00000035212/ENSMUSG00000036792/ENSMUSG00000031980/ENSMUSG00000024052/ENSMUSG00000056515/ENSMUSG00000024830/ENSMUSG00000026791/ENSMUSG00000059486/ENSMUSG00000000441/ENSMUSG00000000440/ENSMUSG00000037643/ENSMUSG00000051136/ENSMUSG00000040760/ENSMUSG00000009281/ENSMUSG00000045294/ENSMUSG00000022376/…	183
GO:0002064	epithelial cell development	142/7589	233/16212	0.609442	1.30192	4.35476	8.89138e-06	0.000310499	0.000218579	ENSMUSG00000031995/ENSMUSG00000032125/ENSMUSG00000021994/ENSMUSG00000034917/ENSMUSG00000013236/ENSMUSG00000032187/ENSMUSG00000032508/ENSMUSG00000031980/ENSMUSG00000039219/ENSMUSG00000022286/ENSMUSG00000110195/ENSMUSG00000034957/ENSMUSG00000015053/ENSMUSG00000025278/ENSMUSG00000022568/ENSMUSG00000022565/ENSMUSG00000026383/ENSMUSG00000045382/ENSMUSG00000030849/ENSMUSG00000010175/ENSMUSG00000050296/…	142
GO:0048546	digestive tract morphogenesis	40/7589	52/16212	0.769231	1.64327	4.35855	8.90857e-06	0.000310499	0.000218579	ENSMUSG00000021994/ENSMUSG00000026556/ENSMUSG00000020122/ENSMUSG00000061393/ENSMUSG00000002633/ENSMUSG00000026383/ENSMUSG00000024985/ENSMUSG00000030849/ENSMUSG00000022510/ENSMUSG00000006932/ENSMUSG00000044548/ENSMUSG00000021109/ENSMUSG00000021944/ENSMUSG00000045680/ENSMUSG00000042812/ENSMUSG00000024134/ENSMUSG00000057329/ENSMUSG00000029428/ENSMUSG00000018822/ENSMUSG00000020644/ENSMUSG00000023991/…	40
GO:0051963	regulation of synapse assembly	116/7589	185/16212	0.627027	1.33949	4.35662	8.97794e-06	0.000311168	0.00021905	ENSMUSG00000045776/ENSMUSG00000021994/ENSMUSG00000013236/ENSMUSG00000013033/ENSMUSG00000047787/ENSMUSG00000030093/ENSMUSG00000034312/ENSMUSG00000034269/ENSMUSG00000030257/ENSMUSG00000049112/ENSMUSG00000051136/ENSMUSG00000063887/ENSMUSG00000052372/ENSMUSG00000021750/ENSMUSG00000033707/ENSMUSG00000034730/ENSMUSG00000022607/ENSMUSG00000026341/ENSMUSG00000059456/ENSMUSG00000030020/ENSMUSG00000029121/…	116
GO:0010721	negative regulation of cell development	158/7589	263/16212	0.60076	1.28337	4.3465	9.13778e-06	0.000314949	0.000221711	ENSMUSG00000000125/ENSMUSG00000020325/ENSMUSG00000031805/ENSMUSG00000021994/ENSMUSG00000013236/ENSMUSG00000032193/ENSMUSG00000028519/ENSMUSG00000032513/ENSMUSG00000024958/ENSMUSG00000034957/ENSMUSG00000000247/ENSMUSG00000028351/ENSMUSG00000030093/ENSMUSG00000015053/ENSMUSG00000029810/ENSMUSG00000002633/ENSMUSG00000022607/ENSMUSG00000026341/ENSMUSG00000020423/ENSMUSG00000010175/ENSMUSG00000022508/…	158
GO:0071772	response to BMP	100/7589	156/16212	0.641026	1.36939	4.34908	9.40523e-06	0.000319452	0.000224881	ENSMUSG00000020325/ENSMUSG00000019428/ENSMUSG00000031849/ENSMUSG00000021994/ENSMUSG00000001911/ENSMUSG00000066839/ENSMUSG00000024098/ENSMUSG00000061393/ENSMUSG00000031963/ENSMUSG00000000440/ENSMUSG00000031965/ENSMUSG00000027660/ENSMUSG00000012396/ENSMUSG00000024074/ENSMUSG00000024975/ENSMUSG00000024985/ENSMUSG00000006205/ENSMUSG00000045648/ENSMUSG00000044674/ENSMUSG00000031681/ENSMUSG00000021096/…	100
GO:0071773	cellular response to BMP stimulus	100/7589	156/16212	0.641026	1.36939	4.34908	9.40523e-06	0.000319452	0.000224881	ENSMUSG00000020325/ENSMUSG00000019428/ENSMUSG00000031849/ENSMUSG00000021994/ENSMUSG00000001911/ENSMUSG00000066839/ENSMUSG00000024098/ENSMUSG00000061393/ENSMUSG00000031963/ENSMUSG00000000440/ENSMUSG00000031965/ENSMUSG00000027660/ENSMUSG00000012396/ENSMUSG00000024074/ENSMUSG00000024975/ENSMUSG00000024985/ENSMUSG00000006205/ENSMUSG00000045648/ENSMUSG00000044674/ENSMUSG00000031681/ENSMUSG00000021096/…	100
[truncated: 522 more rows]

## Sheet: Supplementary File 1d
Supplementary File 1d: Dunnart enhancers and nearest gene expression (TPM)
[truncated: 27,904 more rows]

## Sheet: Supplementary File 1e
Supplementary File 1e: Dunnart promoters and nearest gene expression (TPM)
[truncated: 7,515 more rows]

[truncated: 18 more sheets: Supplementary File 1f, Supplementary File 1g, Supplementary File 1h, Supplementary File 1i, Supplementary File 1j, Supplementary File 1k, Supplementary File 1l, Supplementary File 1m, Supplementary File 1n, Supplementary File 1o, Supplementary File 1p, Supplementary File 1q, Supplementary File 1r, Supplementary File 1s, Supplementary File 1t, Supplementary File 1u, Supplementary File 1v, Supplementary File 1w]
